# Supplementary material for: Identification and validation of hub genes involved in foam cell formation and atherosclerosis development via bioinformatics
Source: PeerJ. 2023 Oct 3;11:e16122. doi: 10.7717/peerj.16122 (PMC10557941; doi:10.7717/peerj.16122)
Supplement: Supplemental Information 1 — Each dataset was screened for key genes according to the process shown in the article, as detailed in the table. [file peerj-11-16122-s001.xlsx]

## Sheet: Supplement 1
primer name	sequence
CSF1R-F	ATTCATCAACGGCTCTGGCA
CSF1R-R	AGGACCTCAGGGTATGGGTC
PLAUR-F	TAAGACCAACGGGGATTGCC
PLAUR-R	TGCATTCGAGGTAACGGCTT

## Sheet: Supplement 2
The DEGs in GSE43292 dataset
	logFC	AveExpr	t	P.Value	adj.P.Val	B	probe_id	symbol	change	ENTREZID
1	0.508192	7.68783	7.14301	9.63e-10	1.32e-05	11.9981	8007483	TMEM106A	up	113277
2	-0.935274	8.95255	-7.09161	1.19e-09	1.32e-05	11.8005	8127346	RAB23	down	51715
3	-1.06685	7.44173	-7.00561	1.69e-09	1.4e-05	11.4703	8131927	PALS2	down	51678
4	0.592028	9.94955	6.89396	2.66e-09	1.6e-05	11.0421	7932985	NRP1	up	8829
5	-1.79441	7.33395	-6.85992	3.05e-09	1.6e-05	10.9116	8077323	CNTN4	down	152330
6	-0.736863	7.60562	-6.76125	4.55e-09	1.6e-05	10.5341	7989718	RASL12	down	51285
7	-0.611788	6.70066	-6.71844	5.41e-09	1.6e-05	10.3705	8083075	PXYLP1	down	92370
8	-0.979082	5.38331	-6.69995	5.83e-09	1.6e-05	10.2999	7980861	CATSPERB	down	79820
9	-0.940642	7.65118	-6.68797	6.12e-09	1.6e-05	10.2542	7971590	CAB39L	down	81617
10	-0.590503	6.93589	-6.68372	6.23e-09	1.6e-05	10.2379	8109612	ADRA1B	down	147
12	-0.524418	5.42406	-6.61003	8.39e-09	1.67e-05	9.95691	8021695	DOK6	down	220164
14	-0.96006	7.25676	-6.5845	9.3e-09	1.67e-05	9.85968	7968307	MTUS2	down	23281
15	-1.57096	8.02192	-6.58165	9.41e-09	1.67e-05	9.8488	8121181	FHL5	down	9457
16	-0.777451	4.21482	-6.57912	9.5e-09	1.67e-05	9.83917	8023710	CDH19	down	28513
18	1.79718	7.91145	6.54506	1.09e-08	1.68e-05	9.70954	8096281	IBSP	up	3381
19	-1.14034	9.06095	-6.54124	1.11e-08	1.68e-05	9.69499	8025918	CNN1	down	1264
20	-0.921916	5.89233	-6.51803	1.22e-08	1.69e-05	9.60674	8175234	GPC3	down	2719
21	-0.857552	7.80828	-6.5044	1.28e-08	1.69e-05	9.55492	8072413	SMTN	down	6525
22	-0.719472	6.64716	-6.50353	1.29e-08	1.69e-05	9.55161	8103745	HAND2	down	9464
23	-1.18945	5.55274	-6.49124	1.35e-08	1.69e-05	9.50492	8105411	IL31RA	down	133396
24	0.789487	7.0743	6.48901	1.37e-08	1.69e-05	9.49645	7927405	WDFY4	up	57705
25	-0.773569	8.87619	-6.4673	1.49e-08	1.69e-05	9.414	8089112	FILIP1L	down	11259
27	-0.821562	9.4114	-6.44443	1.64e-08	1.69e-05	9.32722	7978586	CFL2	down	1073
28	0.730184	7.48554	6.43215	1.72e-08	1.69e-05	9.28064	7997453	PLCG2	up	5336
29	-1.10491	7.78558	-6.427	1.75e-08	1.69e-05	9.2611	7916986	NEGR1	down	257194
30	-0.885962	6.95782	-6.42457	1.77e-08	1.69e-05	9.25189	7909841	MARK1	down	4139
31	-1.13101	8.97058	-6.42432	1.77e-08	1.69e-05	9.25091	8123246	SLC22A3	down	6581
32	0.986287	7.88913	6.42346	1.78e-08	1.69e-05	9.24765	8068697	MX2	up	4600
33	-1.67641	8.5433	-6.40159	1.94e-08	1.8e-05	9.16476	7918878	CASQ2	down	845
34	0.741982	7.14674	6.36674	2.23e-08	1.94e-05	9.03276	8064716	SIGLEC1	up	6614
35	0.720134	6.44817	6.36269	2.27e-08	1.94e-05	9.01745	8048898	SP140	up	11262
36	-0.574018	7.76378	-6.35023	2.39e-08	1.94e-05	8.97028	8008208	NXPH3	down	11248
37	-0.898447	7.31926	-6.3434	2.45e-08	1.95e-05	8.94445	7943749	LAYN	down	143903
39	0.735459	7.5728	6.32883	2.6e-08	1.97e-05	8.88932	7931951	SFMBT2	up	57713
40	-1.91059	6.98487	-6.30977	2.81e-08	2.03e-05	8.8173	7954899	CNTN1	down	1272
41	-0.502833	5.29925	-6.30254	2.89e-08	2.03e-05	8.78998	8144721	C8orf48	down	157773
42	-0.824457	6.71882	-6.30163	2.9e-08	2.03e-05	8.78655	8150197	DUSP26	down	78986
43	-0.767637	8.25557	-6.29644	2.96e-08	2.03e-05	8.76693	8120402	BAG2	down	9532
44	-0.675119	8.35619	-6.29451	2.98e-08	2.03e-05	8.75963	8008547	TOM1L1	down	10040
46	-1.00781	6.57601	-6.26562	3.35e-08	2.04e-05	8.65057	8128837	METTL24	down	728464
47	0.875552	8.19643	6.26429	3.37e-08	2.04e-05	8.64554	7958884	OAS1	up	4938
48	-0.940213	8.61142	-6.26406	3.37e-08	2.04e-05	8.64468	7959102	HSPB8	down	26353
49	0.563354	6.69802	6.25904	3.44e-08	2.05e-05	8.62574	8044584	PSD4	up	23550
50	0.521364	9.31357	6.23729	3.75e-08	2.12e-05	8.54373	8082100	PARP14	up	54625
52	-0.614527	7.83524	-6.22967	3.87e-08	2.12e-05	8.51501	8081548	NECTIN3	down	25945
53	-1.16647	9.23589	-6.22937	3.87e-08	2.12e-05	8.51387	7939052	FIBIN	down	387758
54	-0.864338	6.93892	-6.22916	3.88e-08	2.12e-05	8.51311	7906501	ATP1A2	down	477
55	-0.608488	10.3776	-6.22013	4.02e-08	2.16e-05	8.47907	8135576	TES	down	26136
57	-0.769402	9.25672	-6.20125	4.33e-08	2.24e-05	8.40796	7924619	ENAH	down	55740
59	0.511066	8.99469	6.19117	4.51e-08	2.24e-05	8.37	8010426	RNF213	up	57674
60	0.822791	7.76798	6.18369	4.65e-08	2.28e-05	8.34187	7958913	OAS2	up	4939
61	-0.819266	9.15854	-6.16872	4.93e-08	2.28e-05	8.28554	8141035	SGCE	down	8910
62	-0.697354	9.56982	-6.16548	5e-08	2.28e-05	8.27338	7979204	FERMT2	down	10979
64	-0.865259	6.08994	-6.15855	5.14e-08	2.28e-05	8.24732	8133258	GALNT17	down	64409
66	-0.856797	6.0804	-6.14883	5.34e-08	2.28e-05	8.21079	8053551	REEP1	down	65055
68	-1.0755	8.11278	-6.14535	5.42e-08	2.28e-05	8.19772	8088848	PDZRN3	down	23024
70	-0.871258	5.88064	-6.13569	5.63e-08	2.28e-05	8.16143	7965686	ANKS1B	down	56899
72	-1.63283	8.15201	-6.12876	5.79e-08	2.28e-05	8.13541	8005048	MYOCD	down	93649
74	-0.677683	6.83155	-6.12455	5.88e-08	2.28e-05	8.11958	7976556	C14orf132	down	56967
75	-0.983778	7.37844	-6.121	5.97e-08	2.28e-05	8.10627	8155665	PGM5	down	5239
76	0.800977	7.38325	6.12085	5.97e-08	2.28e-05	8.10572	8138613	OSBPL3	up	26031
77	-0.722958	9.02245	-6.11597	6.09e-08	2.28e-05	8.0874	7930894	GRK5	down	2869
78	-0.84378	7.38037	-6.11388	6.14e-08	2.28e-05	8.07955	7914557	SYNC	down	81493
79	-0.665613	9.25885	-6.11271	6.17e-08	2.28e-05	8.07514	7926916	ZEB1	down	6935
80	-0.709382	6.12397	-6.10549	6.35e-08	2.31e-05	8.04806	8128371	FAXC	down	84553
81	0.558902	8.824	6.10459	6.37e-08	2.31e-05	8.04469	8163452	FKBP15	up	23307
82	-0.797861	5.97414	-6.09613	6.59e-08	2.36e-05	8.01297	8144213	VIPR2	down	7434
84	-0.584396	6.07626	-6.08339	6.93e-08	2.43e-05	7.96518	7969533	SLAIN1	down	122060
85	-0.883269	6.1023	-6.07756	7.09e-08	2.44e-05	7.94335	7910727	ACTN2	down	88
86	-0.614197	10.5213	-6.07478	7.17e-08	2.44e-05	7.93293	8107133	PAM	down	5066
88	-0.881995	9.83557	-6.06903	7.34e-08	2.45e-05	7.91137	7950933	NOX4	down	50507
89	2.43488	5.56756	6.06872	7.35e-08	2.45e-05	7.91022	8151532	FABP4	up	2167
91	0.737172	7.16333	6.05155	7.86e-08	2.57e-05	7.84593	8130768	RNASET2	up	8635
92	0.786783	7.64917	6.04062	8.21e-08	2.62e-05	7.80501	7921752	ARHGAP30	up	257106
93	-0.641563	9.22647	-6.03816	8.29e-08	2.62e-05	7.79579	8163257	LPAR1	down	1902
94	-0.951596	7.78177	-6.03679	8.34e-08	2.62e-05	7.79069	7912692	HSPB7	down	27129
96	-0.683157	6.87939	-6.01871	8.96e-08	2.71e-05	7.72305	8151101	MYBL1	down	4603
97	-1.28617	5.44707	-6.01364	9.14e-08	2.72e-05	7.7041	8077366	LRRN1	down	57633
98	-1.12682	6.01091	-6.01103	9.24e-08	2.72e-05	7.69435	7971905	PCDH20	down	64881
99	-0.56784	8.04015	-6.00759	9.36e-08	2.72e-05	7.68151	7954604	KLHL42	down	57542
101	0.7488	6.16323	6.00028	9.64e-08	2.72e-05	7.65419	8094240	CD38	up	952
102	-0.753086	12.0986	-5.99961	9.66e-08	2.72e-05	7.6517	8101659	SPARCL1	down	8404
103	-1.0292	9.9181	-5.99777	9.74e-08	2.72e-05	7.6448	7902495	NEXN	down	91624
104	-0.594725	9.78801	-5.99535	9.83e-08	2.72e-05	7.63576	8020090	TWSG1	down	57045
106	-0.558233	7.32264	-5.98705	1.02e-07	2.72e-05	7.60479	7919699	OTUD7B	down	56957
108	-0.917081	9.79326	-5.98577	1.02e-07	2.72e-05	7.59999	7980891	TC2N	down	123036
110	0.570098	6.03697	5.98027	1.04e-07	2.74e-05	7.57947	8047403	CASP10	up	843
111	-1.3735	6.71671	-5.97569	1.06e-07	2.74e-05	7.56239	8173825	RPS6KA6	down	27330
112	-0.726713	7.88787	-5.97432	1.07e-07	2.74e-05	7.55726	7931977	ITIH5	down	80760
113	-0.781481	9.98535	-5.97369	1.07e-07	2.74e-05	7.55493	7928855	BMPR1A	down	657
115	-0.928626	8.19163	-5.96445	1.11e-07	2.74e-05	7.52046	8127646	FILIP1	down	27145
116	0.519159	6.03005	5.96383	1.11e-07	2.74e-05	7.51812	7995539	NOD2	up	64127
118	0.728728	8.36924	5.96115	1.13e-07	2.74e-05	7.50813	8049246	INPP5D	up	3635
119	-0.872651	8.51897	-5.95826	1.14e-07	2.74e-05	7.49737	7961540	RERG	down	85004
120	-1.20337	6.99397	-5.95752	1.14e-07	2.74e-05	7.4946	8058591	ACADL	down	33
122	-0.935047	8.01667	-5.95464	1.15e-07	2.74e-05	7.48387	8095751	PARM1	down	25849
123	0.776859	7.2422	5.95177	1.17e-07	2.74e-05	7.47316	7958895	OAS3	up	4940
124	0.630609	7.11096	5.95177	1.17e-07	2.74e-05	7.47316	8088247	ARHGEF3	up	50650
125	-0.640321	6.39434	-5.94972	1.18e-07	2.74e-05	7.46553	8174654	KLHL13	down	90293
126	-1.03384	8.25089	-5.94732	1.19e-07	2.75e-05	7.45657	8168892	TCEAL2	down	140597
127	-1.50838	6.30524	-5.94383	1.21e-07	2.77e-05	7.44355	8098344	HAND2-AS1	down	79804
128	-0.586047	5.88714	-5.9397	1.23e-07	2.79e-05	7.42818	8104693	PDZD2	down	23037
129	0.824985	7.76308	5.9374	1.24e-07	2.8e-05	7.41962	7997427	CMIP	up	80790
130	0.827983	7.72846	5.92959	1.27e-07	2.85e-05	7.3905	8028104	HCST	up	10870
131	-0.523138	7.01093	-5.92936	1.28e-07	2.85e-05	7.38966	8102567	PRDM5	down	11107
133	0.924062	8.78989	5.91882	1.33e-07	2.91e-05	7.35043	7903980	C1orf162	up	128346
135	-0.512807	5.87605	-5.91157	1.37e-07	2.95e-05	7.32343	8083240	AGTR1	down	185
136	0.598406	9.52017	5.90995	1.38e-07	2.95e-05	7.3174	7946228	TPP1	up	1200
137	-1.02019	5.96194	-5.90891	1.38e-07	2.95e-05	7.31356	8129666	SLC2A12	down	154091
138	0.653764	10.4854	5.90594	1.4e-07	2.96e-05	7.30249	8111772	DAB2	up	1601
140	-0.682446	7.35837	-5.9036	1.41e-07	2.96e-05	7.29379	8114900	PPP2R2B	down	5521
142	0.65972	7.98143	5.89685	1.45e-07	2.98e-05	7.26868	8078405	CMTM7	up	112616
144	-0.57452	7.33152	-5.89518	1.46e-07	2.98e-05	7.26249	7938348	WEE1	down	7465
145	-0.771954	8.75669	-5.88453	1.52e-07	3.06e-05	7.2229	7942135	ANO1	down	55107
147	-0.504576	8.56098	-5.86949	1.62e-07	3.15e-05	7.16702	8020423	MIB1	down	57534
148	0.54918	6.57927	5.86886	1.62e-07	3.15e-05	7.16467	8146579	CHD7	up	55636
149	0.510281	8.99241	5.86771	1.63e-07	3.15e-05	7.16039	8082075	DTX3L	up	151636
150	-1.20091	6.36321	-5.86754	1.63e-07	3.15e-05	7.15975	8060897	PLCB4	down	5332
152	-0.529819	6.50048	-5.86226	1.66e-07	3.18e-05	7.14016	7989069	PYGO1	down	26108
154	-0.799283	8.03397	-5.85114	1.74e-07	3.19e-05	7.0989	8173917	NAP1L3	down	4675
155	-0.997556	7.73485	-5.84997	1.75e-07	3.19e-05	7.09455	7951165	PGR	down	5241
156	-0.673603	9.63816	-5.84939	1.75e-07	3.19e-05	7.09241	7943398	YAP1	down	10413
157	-0.85813	8.57056	-5.84767	1.76e-07	3.19e-05	7.08601	8085774	ZNF385D	down	79750
158	-0.606514	6.84963	-5.84513	1.78e-07	3.19e-05	7.07659	8168179	DLG3	down	1741
159	0.734153	9.19932	5.84424	1.79e-07	3.19e-05	7.07328	8078014	SLC6A6	up	6533
161	-0.611241	4.06107	-5.8432	1.79e-07	3.19e-05	7.06944	8171791	SMPX	down	23676
162	-0.976755	8.06756	-5.84303	1.79e-07	3.19e-05	7.06881	7932765	MPP7	down	143098
163	-0.974034	6.12605	-5.83555	1.85e-07	3.27e-05	7.04107	7954926	PDZRN4	down	29951
164	-0.575423	4.37123	-5.83464	1.85e-07	3.27e-05	7.03769	8169717	GRIA3	down	2892
165	0.544735	9.05157	5.83092	1.88e-07	3.28e-05	7.02389	7986350	ARRDC4	up	91947
166	-1.11464	6.27298	-5.83071	1.88e-07	3.28e-05	7.02312	7925511	PLD5	down	200150
169	-0.7512	10.3989	-5.81921	1.97e-07	3.38e-05	6.9805	7951662	CRYAB	down	1410
171	-0.856354	7.7309	-5.80979	2.04e-07	3.43e-05	6.9456	8097086	MYOZ2	down	51778
172	1.04088	7.96013	5.80865	2.05e-07	3.43e-05	6.94138	8099721	SEL1L3	up	23231
173	-0.796463	9.47653	-5.80773	2.06e-07	3.43e-05	6.93797	8117120	ID4	down	3400
175	0.833903	9.09312	5.79646	2.15e-07	3.54e-05	6.89625	8006214	ADAP2	up	55803
176	-0.744847	7.10676	-5.79554	2.16e-07	3.54e-05	6.89285	8106689	CKMT2	down	1160
177	-1.3657	6.95418	-5.79441	2.17e-07	3.54e-05	6.88865	8088866	CNTN3	down	5067
178	0.865248	8.34673	5.79296	2.18e-07	3.54e-05	6.88331	8075910	RAC2	up	5880
180	0.555496	6.74913	5.79046	2.21e-07	3.55e-05	6.87407	8085431	NUP210	up	23225
182	0.874162	8.90845	5.78691	2.24e-07	3.55e-05	6.86092	8072798	CYTH4	up	27128
184	0.580635	8.66769	5.78407	2.26e-07	3.55e-05	6.85043	8004184	XAF1	up	54739
185	-0.891221	6.89548	-5.784	2.26e-07	3.55e-05	6.85017	7953278	KCNA5	down	3741
186	-0.609628	10.2091	-5.77978	2.3e-07	3.58e-05	6.83454	8057517	NCKAP1	down	10787
190	1.61383	7.60478	5.77113	2.38e-07	3.61e-05	6.80256	8056222	DPP4	up	1803
191	-0.554248	9.26563	-5.77109	2.38e-07	3.61e-05	6.80243	8080685	SLMAP	down	7871
192	-0.58375	6.73306	-5.76991	2.39e-07	3.61e-05	6.79807	7926506	CACNB2	down	783
193	-1.13989	6.11405	-5.76872	2.4e-07	3.61e-05	6.79366	7922598	ANGPTL1	down	9068
194	-0.563379	6.79296	-5.76842	2.4e-07	3.61e-05	6.79257	8120279	LRRC1	down	55227
195	-0.908386	8.60793	-5.76675	2.42e-07	3.61e-05	6.78637	7918857	TSPAN2	down	10100
197	0.632367	8.81316	5.76346	2.45e-07	3.63e-05	6.77423	8142345	DOCK4	up	9732
199	-0.554486	8.30994	-5.75985	2.49e-07	3.65e-05	6.76088	7904830	RNF115	down	27246
201	-0.673206	6.92738	-5.75514	2.53e-07	3.68e-05	6.7435	8044882	EPB41L5	down	57669
203	0.518566	8.03036	5.74758	2.61e-07	3.74e-05	6.71559	7929282	HHEX	up	3087
204	-0.779125	7.35934	-5.74651	2.62e-07	3.74e-05	6.71164	8135990	FLNC	down	2318
207	-0.922863	10.912	-5.74446	2.64e-07	3.74e-05	6.70406	8172022	TMEM47	down	83604
210	-0.568939	8.09349	-5.72601	2.84e-07	3.97e-05	6.63599	7956658	SLC16A7	down	9194
211	1.02201	7.03169	5.72504	2.85e-07	3.97e-05	6.63242	7918157	VAV3	up	10451
212	-0.713969	9.19431	-5.72007	2.91e-07	4e-05	6.61408	8104022	PDLIM3	down	27295
213	1.13181	10.8276	5.71955	2.91e-07	4e-05	6.61218	7960794	CD163	up	9332
215	0.511578	6.68009	5.71877	2.92e-07	4e-05	6.60932	8093624	SH3BP2	up	6452
216	-0.65193	5.12784	-5.71548	2.96e-07	4.01e-05	6.59716	8128316	GPR63	down	81491
217	0.69373	7.38423	5.71519	2.96e-07	4.01e-05	6.59611	7899192	RPS6KA1	up	6195
218	1.00363	7.46432	5.71485	2.97e-07	4.01e-05	6.59485	8121257	PRDM1	up	639
219	-0.505452	4.23758	-5.71033	3.02e-07	4.04e-05	6.5782	8173059	WNK3	down	65267
222	0.732423	7.40085	5.70912	3.03e-07	4.04e-05	6.57374	7954436	IRAG2	up	4033
225	0.893061	7.63439	5.70002	3.14e-07	4.12e-05	6.54021	8174051	BTK	up	695
226	-0.791215	6.72893	-5.69936	3.15e-07	4.12e-05	6.53778	8054281	LONRF2	down	164832
229	-0.516208	8.06118	-5.69372	3.22e-07	4.14e-05	6.51703	8168580	APOOL	down	139322
230	-0.603997	6.30773	-5.69	3.27e-07	4.17e-05	6.50333	7901426	ZFYVE9	down	9372
231	-0.824618	8.32159	-5.68992	3.27e-07	4.17e-05	6.50302	8154012	KANK1	down	23189
233	-1.15764	7.09119	-5.68525	3.33e-07	4.19e-05	6.48584	8103736	SCRG1	down	11341
234	-0.545472	8.5274	-5.68458	3.34e-07	4.19e-05	6.4834	8150537	SLC20A2	down	6575
238	-0.620855	9.78217	-5.67822	3.42e-07	4.22e-05	6.45998	8100318	SGCB	down	6443
239	1.17901	7.92232	5.67461	3.47e-07	4.22e-05	6.44671	8086600	CCR1	up	1230
240	0.81214	8.07332	5.67404	3.48e-07	4.22e-05	6.44461	8126839	TNFRSF21	up	27242
241	0.511608	9.85573	5.67372	3.48e-07	4.22e-05	6.44344	7922051	CREG1	up	8804
242	-0.654574	6.9251	-5.67368	3.48e-07	4.22e-05	6.44329	7919645	SV2A	down	9900
243	-0.785783	7.9304	-5.67351	3.49e-07	4.22e-05	6.44265	7961365	MANSC1	down	54682
244	-0.651337	5.44338	-5.67254	3.5e-07	4.22e-05	6.43911	8162006	GKAP1	down	80318
248	-0.760306	11.0415	-5.66973	3.54e-07	4.22e-05	6.42876	7980908	FBLN5	down	10516
249	0.869022	7.29155	5.66934	3.54e-07	4.22e-05	6.42735	7963614	ITGB7	up	3695
251	0.81366	8.53391	5.66778	3.57e-07	4.22e-05	6.4216	8099967	RBM47	up	54502
252	0.694382	6.73467	5.66561	3.6e-07	4.25e-05	6.41361	7978366	GZMB	up	3002
254	-0.896569	6.35782	-5.66196	3.65e-07	4.28e-05	6.4002	8141016	TFPI2	down	7980
255	-1.13894	5.5079	-5.66094	3.66e-07	4.28e-05	6.39646	7983779	UNC13C	down	440279
257	-1.02701	9.52187	-5.64876	3.84e-07	4.44e-05	6.35172	8161865	PRUNE2	down	158471
258	0.799888	9.37679	5.64817	3.85e-07	4.44e-05	6.34955	8146500	LYN	up	4067
259	0.564151	9.41786	5.64604	3.88e-07	4.44e-05	6.34172	8081740	ATP6V1A	up	523
260	0.665779	7.11152	5.64516	3.89e-07	4.44e-05	6.33849	7971486	RUBCNL	up	80183
262	0.703245	7.19639	5.64274	3.93e-07	4.45e-05	6.3296	7911178	NLRP3	up	114548
263	0.555257	7.60684	5.64021	3.97e-07	4.48e-05	6.32034	8109350	SLC36A1	up	206358
264	-0.724591	10.345	-5.63896	3.99e-07	4.48e-05	6.31573	7923578	FMOD	down	2331
265	-0.766861	7.95544	-5.63841	4e-07	4.48e-05	6.31373	8083166	TRPC1	down	7220
266	-0.541242	6.08172	-5.63722	4.02e-07	4.49e-05	6.30934	7915982	BEND5	down	79656
268	0.693682	6.65463	5.63252	4.09e-07	4.54e-05	6.29209	8096116	GPAT3	up	84803
271	0.679334	7.89697	5.62354	4.24e-07	4.65e-05	6.25917	7974835	PRKCH	up	5583
272	-0.652811	8.27771	-5.62144	4.27e-07	4.65e-05	6.25146	8027760	FXYD1	down	5348
273	0.841547	6.37658	5.61979	4.3e-07	4.65e-05	6.24542	7971296	EPSTI1	up	94240
276	0.530191	8.97665	5.61667	4.35e-07	4.65e-05	6.23398	8047738	NRP2	up	8828
277	-0.551497	6.84934	-5.61626	4.36e-07	4.65e-05	6.23246	8020164	GNAL	down	2774
278	-0.633455	7.09267	-5.61621	4.36e-07	4.65e-05	6.23228	8050497	OSR1	down	130497
280	0.957631	9.42765	5.6151	4.38e-07	4.65e-05	6.22822	7955908	NCKAP1L	up	3071
281	0.647278	7.9086	5.61367	4.4e-07	4.65e-05	6.22297	8139057	ELMO1	up	9844
283	0.612099	8.04639	5.6129	4.42e-07	4.65e-05	6.22015	7995492	ADCY7	up	113
286	0.68474	8.83184	5.60888	4.49e-07	4.67e-05	6.20541	8021727	CNDP2	up	55748
287	-0.515939	9.21684	-5.6082	4.5e-07	4.67e-05	6.20292	7925531	AKT3	down	10000
288	0.504525	9.07924	5.60766	4.51e-07	4.67e-05	6.20096	7965359	ATP2B1	up	490
290	-0.76378	5.31526	-5.6031	4.59e-07	4.71e-05	6.18425	8134351	PPP1R9A	down	55607
292	0.940616	9.48176	5.60158	4.61e-07	4.71e-05	6.17869	7897620	PGD	up	5226
299	-0.565653	10.8398	-5.58462	4.93e-07	4.9e-05	6.11661	7922846	NIBAN1	down	116496
300	0.606159	9.86761	5.58368	4.95e-07	4.9e-05	6.11315	8058552	IDH1	up	3417
301	0.846483	10.4342	5.57996	5.02e-07	4.94e-05	6.09954	8036224	TYROBP	up	7305
302	-1.243	6.49343	-5.57751	5.07e-07	4.98e-05	6.0906	8005043	LINC00670	down	284034
303	-1.24371	7.05673	-5.57533	5.11e-07	4.99e-05	6.08263	7910792	RYR2	down	6262
305	0.615974	8.63076	5.57227	5.17e-07	5.01e-05	6.07141	7908125	RGL1	up	23179
306	-0.581866	7.94084	-5.57078	5.2e-07	5.01e-05	6.06599	7978407	PRKD1	down	5587
308	-1.0683	9.49681	-5.56926	5.23e-07	5.01e-05	6.0604	8096704	NPNT	down	255743
309	0.81693	8.90554	5.56903	5.24e-07	5.01e-05	6.05957	8115734	LCP2	up	3937
310	-0.584427	5.7313	-5.5687	5.24e-07	5.01e-05	6.05838	7906552	CASQ1	down	844
313	0.511897	7.34813	5.56682	5.28e-07	5.01e-05	6.05148	8084951	NRROS	up	375387
314	-0.542288	8.87088	-5.5661	5.3e-07	5.01e-05	6.04887	8147766	FZD6	down	8323
315	-0.849817	6.83132	-5.56509	5.32e-07	5.01e-05	6.04519	8083471	ARHGEF26	down	26084
316	0.844251	9.01304	5.56464	5.33e-07	5.01e-05	6.04355	8047161	NABP1	up	64859
317	0.505179	9.22158	5.56326	5.36e-07	5.01e-05	6.0385	8152867	ASAP1	up	50807
318	0.529492	6.12401	5.56308	5.36e-07	5.01e-05	6.03784	8163618	TNFSF15	up	9966
319	-0.532932	10.4682	-5.55986	5.43e-07	5.06e-05	6.02607	8062312	MYL9	down	10398
321	0.691638	7.64917	5.55569	5.52e-07	5.12e-05	6.01082	8134814	PILRA	up	29992
322	-0.691189	8.93046	-5.55325	5.57e-07	5.15e-05	6.00193	8098576	SLC25A4	down	291
325	1.10395	9.40968	5.54876	5.67e-07	5.18e-05	5.98553	8042391	PLEK	up	5341
326	0.855678	9.28029	5.54837	5.67e-07	5.18e-05	5.9841	8115076	CSF1R	up	1436
328	1.41666	8.49347	5.54586	5.73e-07	5.19e-05	5.97494	8072678	HMOX1	up	3162
332	1.87605	8.94216	5.54234	5.81e-07	5.2e-05	5.96208	8043431	IGKC	up	3514
333	0.653241	9.0795	5.54185	5.82e-07	5.2e-05	5.96029	8030374	FCGRT	up	2217
335	0.705362	8.37299	5.54028	5.86e-07	5.2e-05	5.95457	8161701	CEMIP2	up	23670
336	0.788352	7.49364	5.5389	5.89e-07	5.2e-05	5.94953	7930498	ACSL5	up	51703
337	-0.894887	8.97501	-5.53766	5.91e-07	5.2e-05	5.94499	7973850	AKAP6	down	9472
338	-0.741718	8.29074	-5.53763	5.92e-07	5.2e-05	5.94488	8156706	TMOD1	down	7111
339	0.884505	7.79456	5.5372	5.93e-07	5.2e-05	5.94333	7926786	APBB1IP	up	54518
341	0.928251	8.58653	5.53575	5.96e-07	5.2e-05	5.93802	8103601	DDX60L	up	91351
342	-1.23327	7.69213	-5.53535	5.97e-07	5.2e-05	5.93658	8104746	NPR3	down	4883
343	-0.522871	5.7099	-5.53431	5.99e-07	5.2e-05	5.93278	8168291	ITGB1BP2	down	26548
346	-0.714748	10.5698	-5.5315	6.06e-07	5.22e-05	5.92253	8096314	PKD2	down	5311
347	-1.89596	8.72107	-5.53097	6.07e-07	5.22e-05	5.9206	7946946	TPH1	down	7166
349	-0.621602	7.44241	-5.52667	6.17e-07	5.28e-05	5.90491	8016094	GJC1	down	10052
351	0.750998	7.96971	5.52496	6.21e-07	5.29e-05	5.89869	8072015	GRK3	up	157
352	-1.23526	6.81013	-5.52161	6.29e-07	5.33e-05	5.88646	8106448	PDE8B	down	8622
355	-0.61216	10.6365	-5.51981	6.34e-07	5.34e-05	5.87991	8061114	DSTN	down	11034
356	0.55814	6.61327	5.51953	6.35e-07	5.34e-05	5.87887	8164644	FAM78A	up	286336
358	0.750892	7.56088	5.51799	6.38e-07	5.34e-05	5.87327	8042416	ARHGAP25	up	9938
359	0.757286	11.082	5.51659	6.42e-07	5.35e-05	5.86817	8007620	GRN	up	2896
361	-0.581532	7.66835	-5.51533	6.45e-07	5.35e-05	5.86359	7975076	HSPA2	down	3306
362	-0.70898	11.2834	-5.51505	6.46e-07	5.35e-05	5.86256	8161044	TPM2	down	7169
363	-0.964458	6.17979	-5.51166	6.54e-07	5.39e-05	5.85021	8169115	NRK	down	203447
365	0.934829	9.35143	5.50931	6.6e-07	5.39e-05	5.84164	7953428	CD4	up	920
368	0.686363	8.71517	5.50818	6.63e-07	5.39e-05	5.83754	7994769	CORO1A	up	11151
369	-0.607408	7.09035	-5.50754	6.65e-07	5.39e-05	5.83521	8131205	SDK1	down	221935
370	0.672068	8.88924	5.50734	6.65e-07	5.39e-05	5.83446	7988921	MYO5A	up	4644
373	0.711709	7.16564	5.50435	6.73e-07	5.41e-05	5.82357	7905789	IL6R	up	3570
374	-0.621971	8.65572	-5.50293	6.77e-07	5.43e-05	5.81841	7931479	INPP5A	down	3632
375	0.911822	7.81173	5.50162	6.8e-07	5.43e-05	5.81365	8152988	SLA	up	6503
376	0.885147	9.01272	5.50153	6.8e-07	5.43e-05	5.81332	8109843	DOCK2	up	1794
377	0.664096	9.31586	5.49943	6.86e-07	5.46e-05	5.80565	7939839	PTPRJ	up	5795
378	1.0707	8.64895	5.49864	6.88e-07	5.46e-05	5.80278	7908003	NPL	up	80896
379	0.92023	8.68621	5.49831	6.89e-07	5.46e-05	5.80158	8009653	CD300A	up	11314
380	-1.16809	9.25378	-5.49784	6.9e-07	5.46e-05	5.79986	8120961	MRAP2	down	112609
381	-0.693044	6.98195	-5.49627	6.94e-07	5.48e-05	5.79418	7907053	STYXL2	down	92235
382	-0.650519	8.14602	-5.49375	7.01e-07	5.51e-05	5.785	8111892	OXCT1	down	5019
383	-0.632639	6.72544	-5.49205	7.06e-07	5.51e-05	5.77881	8174271	RAB9B	down	51209
386	0.733335	6.1542	5.49054	7.1e-07	5.51e-05	5.77329	8005809	LGALS9	up	3965
387	0.627427	8.02967	5.49052	7.1e-07	5.51e-05	5.77322	8018922	CYTH1	up	9267
388	-0.512056	10.0715	-5.48941	7.13e-07	5.52e-05	5.76919	7965123	PPP1R12A	down	4659
392	0.735355	7.78924	5.48165	7.35e-07	5.59e-05	5.74098	7938396	AMPD3	up	272
393	0.600738	7.32483	5.48156	7.35e-07	5.59e-05	5.74066	7970162	ATP11A	up	23250
398	-0.603112	7.94429	-5.47421	7.56e-07	5.68e-05	5.71392	8058258	TMEM237	down	65062
400	-0.510304	8.53949	-5.4732	7.59e-07	5.68e-05	5.71023	8154381	LURAP1L	down	286343
401	0.59761	9.84654	5.47168	7.64e-07	5.7e-05	5.70471	7922689	GLUL	up	2752
403	-0.73607	10.257	-5.46859	7.73e-07	5.73e-05	5.6935	8121749	GJA1	down	2697
404	0.506064	7.88731	5.46747	7.76e-07	5.74e-05	5.68943	8072710	APOL6	up	80830
405	0.528945	8.94724	5.46549	7.82e-07	5.77e-05	5.68222	7928171	SGPL1	up	8879
406	0.622046	5.80821	5.464	7.87e-07	5.78e-05	5.67684	8138231	THSD7A	up	221981
407	-1.04146	6.13116	-5.46351	7.88e-07	5.78e-05	5.67505	8083968	NLGN1	down	22871
408	0.768031	8.18798	5.46345	7.88e-07	5.78e-05	5.67481	8136557	TBXAS1	up	6916
410	0.581611	7.11647	5.45797	8.05e-07	5.88e-05	5.65492	7935270	BLNK	up	29760
413	-0.894212	7.43594	-5.45263	8.22e-07	5.95e-05	5.63552	8047926	MAP2	down	4133
414	0.558548	9.41634	5.45158	8.25e-07	5.96e-05	5.63173	8114225	MACROH2A1	up	9555
416	-1.16866	5.17923	-5.4488	8.34e-07	5.96e-05	5.62163	7929373	LGI1	down	9211
417	-0.84247	9.55329	-5.4478	8.37e-07	5.96e-05	5.61801	7952205	MCAM	down	4162
419	0.743765	9.63258	5.44734	8.39e-07	5.96e-05	5.61634	8176174	MPP1	up	4354
420	-0.827063	9.10699	-5.44713	8.39e-07	5.96e-05	5.61556	8091446	PFN2	down	5217
421	-0.521105	6.38149	-5.44691	8.4e-07	5.96e-05	5.61477	8092520	C3orf70	down	285382
422	-0.544358	7.09278	-5.4449	8.47e-07	5.98e-05	5.6075	8163063	CTNNAL1	down	8727
423	0.896624	9.41684	5.44489	8.47e-07	5.98e-05	5.60743	8039257	LAIR1	up	3903
427	-0.903998	7.96703	-5.4419	8.57e-07	6e-05	5.59658	7965918	NT5DC3	down	51559
428	1.38234	6.93378	5.4411	8.59e-07	6.01e-05	5.59369	8044574	IL1RN	up	3557
430	0.878753	8.65357	5.43665	8.74e-07	6.09e-05	5.57756	8153959	DOCK8	up	81704
431	0.779494	5.81277	5.43594	8.76e-07	6.09e-05	5.57498	7907657	RALGPS2	up	55103
432	0.748704	8.33069	5.43537	8.78e-07	6.09e-05	5.57291	8152764	MTSS1	up	9788
434	0.505853	7.70835	5.43425	8.82e-07	6.09e-05	5.56885	8018082	SLC39A11	up	201266
435	-1.03018	9.21832	-5.43226	8.89e-07	6.13e-05	5.56163	7917199	TTLL7	down	79739
436	0.824157	8.01892	5.43114	8.93e-07	6.14e-05	5.5576	8101757	GPRIN3	up	285513
437	0.540871	9.96168	5.43049	8.95e-07	6.14e-05	5.55521	8045247	PLEKHB2	up	55041
438	0.862424	8.17921	5.42984	8.97e-07	6.14e-05	5.55288	8115783	STK10	up	6793
440	-0.884542	6.3995	-5.42899	9e-07	6.14e-05	5.54979	8168589	ZNF711	down	7552
442	-0.911909	8.4399	-5.4261	9.1e-07	6.19e-05	5.53933	8175539	LDOC1	down	23641
447	-0.784564	6.88045	-5.42298	9.21e-07	6.19e-05	5.52799	8068620	SH3BGR	down	6450
448	-0.571049	4.72702	-5.42237	9.23e-07	6.19e-05	5.52578	8105495	PART1	down	25859
449	0.527755	8.79835	5.4217	9.26e-07	6.19e-05	5.52336	7981290	WARS1	up	7453
451	-0.918868	9.32723	-5.4198	9.33e-07	6.2e-05	5.51647	8007420	AOC3	down	8639
454	-1.01801	7.28385	-5.41813	9.39e-07	6.2e-05	5.51044	8022045	MYOM1	down	8736
457	-0.530339	9.32655	-5.41528	9.49e-07	6.25e-05	5.50011	8174985	SMARCA1	down	6594
458	0.670178	7.72369	5.41368	9.55e-07	6.27e-05	5.49433	7987475	PLCB2	up	5330
459	-0.950895	8.3556	-5.41171	9.62e-07	6.28e-05	5.4872	8046906	GULP1	down	51454
463	0.921652	8.17705	5.41064	9.66e-07	6.28e-05	5.48332	8115464	HAVCR2	up	84868
464	-0.686677	6.89843	-5.41015	9.68e-07	6.28e-05	5.48155	8022803	GAREM1	down	64762
467	0.58266	7.18606	5.40203	9.99e-07	6.44e-05	5.45217	8119132	FGD2	up	221472
469	-0.696577	7.41541	-5.39881	1.01e-06	6.48e-05	5.4405	8107850	CHSY3	down	337876
471	-0.900232	8.19893	-5.39559	1.02e-06	6.54e-05	5.42886	8118890	SCUBE3	down	222663
472	-0.558612	8.67395	-5.39457	1.03e-06	6.54e-05	5.42516	8103166	SH3D19	down	152503
473	-0.879773	6.11096	-5.39404	1.03e-06	6.54e-05	5.42326	8124211	GPLD1	down	2822
476	0.871569	7.34449	5.39175	1.04e-06	6.56e-05	5.41498	8172471	PIM2	up	11040
477	0.538639	7.59976	5.39007	1.05e-06	6.59e-05	5.40889	7949904	UNC93B1	up	81622
478	-0.574805	8.52062	-5.38942	1.05e-06	6.59e-05	5.40654	7900510	CTPS1	down	1503
479	0.762987	5.99974	5.38913	1.05e-06	6.59e-05	5.4055	8082086	PARP15	up	165631
480	-1.04524	7.77291	-5.38823	1.05e-06	6.6e-05	5.40223	8151369	SBSPON	down	157869
481	0.890374	8.50854	5.38716	1.06e-06	6.62e-05	5.39838	8080344	STAB1	up	23166
482	-0.940833	7.74651	-5.38672	1.06e-06	6.62e-05	5.3968	8090070	ADCY5	down	111
483	0.692036	8.1103	5.38503	1.07e-06	6.63e-05	5.39068	7948332	LPXN	up	9404
484	-0.653316	5.76752	-5.38456	1.07e-06	6.63e-05	5.389	8101002	BTC	down	685
485	0.750117	7.48333	5.38283	1.08e-06	6.67e-05	5.38274	7899394	THEMIS2	up	9473
486	-0.594016	7.29272	-5.38183	1.08e-06	6.68e-05	5.37912	8058695	BARD1	down	580
487	0.749338	6.79883	5.38104	1.08e-06	6.68e-05	5.37627	7994826	ITGAL	up	3683
488	0.63574	8.33519	5.38034	1.09e-06	6.68e-05	5.37373	7945132	FLI1	up	2313
489	-0.739787	12.3441	-5.37978	1.09e-06	6.68e-05	5.37172	7921916	RGS5	down	8490
490	-0.536719	8.30336	-5.37313	1.12e-06	6.76e-05	5.3477	8115756	KCNMB1	down	3779
492	0.505484	6.20637	5.37243	1.12e-06	6.76e-05	5.34515	8140782	ABCB1	up	5243
493	-0.640466	11.3846	-5.37142	1.12e-06	6.76e-05	5.34152	8169473	PLS3	down	5358
494	0.98065	5.57127	5.37064	1.13e-06	6.76e-05	5.33871	8147830	DCSTAMP	up	81501
495	-0.848575	7.54251	-5.3699	1.13e-06	6.76e-05	5.33604	8097335	HSPA4L	down	22824
496	0.565231	7.71178	5.36965	1.13e-06	6.76e-05	5.33512	8018177	CD300C	up	10871
498	-0.87455	8.80334	-5.36876	1.13e-06	6.76e-05	5.33192	8172204	MAOB	down	4129
499	0.954378	7.44557	5.36876	1.13e-06	6.76e-05	5.3319	8171896	TASL	up	80231
500	1.2887	9.47209	5.36807	1.14e-06	6.76e-05	5.32943	7981720	IGHA1	up	3493
502	-0.603626	6.65877	-5.36745	1.14e-06	6.76e-05	5.32718	8102440	ARSJ	down	79642
503	-0.509855	8.60446	-5.36743	1.14e-06	6.76e-05	5.32712	8117243	CARMIL1	down	55604
504	0.894436	7.32417	5.36739	1.14e-06	6.76e-05	5.32698	7963289	BIN2	up	51411
505	-0.851797	7.32305	-5.36699	1.14e-06	6.76e-05	5.32552	8095834	SHROOM3	down	57619
506	-0.66702	7.0866	-5.36642	1.15e-06	6.76e-05	5.32345	8113641	CDO1	down	1036
508	-0.867967	7.95496	-5.3651	1.15e-06	6.77e-05	5.3187	8042356	MEIS1	down	4211
509	-0.628699	7.69509	-5.36433	1.15e-06	6.77e-05	5.31591	7957386	ACSS3	down	79611
510	0.760305	8.62078	5.36424	1.15e-06	6.77e-05	5.3156	8092177	NCEH1	up	57552
512	0.741269	6.68561	5.36266	1.16e-06	6.79e-05	5.30989	8132819	IKZF1	up	10320
516	-0.560248	6.63066	-5.35824	1.18e-06	6.85e-05	5.29396	8043244	ATOH8	down	84913
517	-0.912284	10.6192	-5.3566	1.19e-06	6.87e-05	5.28804	8097080	SYNPO2	down	171024
519	0.958941	7.96274	5.35533	1.19e-06	6.88e-05	5.28344	7921637	CD84	up	8832
520	-0.604096	6.64783	-5.35359	1.2e-06	6.89e-05	5.27716	8083978	NAALADL2	down	254827
521	-0.697488	7.95054	-5.35201	1.21e-06	6.92e-05	5.27147	7980616	PTPN21	down	11099
524	-0.618224	6.79941	-5.34393	1.25e-06	7.11e-05	5.24235	8082869	PPP2R3A	down	5523
525	-0.884845	6.81348	-5.34185	1.26e-06	7.14e-05	5.23487	8169389	PAK3	down	5063
526	0.69982	7.9013	5.34179	1.26e-06	7.14e-05	5.23462	8007757	FMNL1	up	752
527	-0.677712	6.74231	-5.34075	1.26e-06	7.16e-05	5.23088	8128553	BVES	down	11149
528	1.01324	6.98763	5.33836	1.28e-06	7.21e-05	5.22226	8091402	TM4SF18	up	116441
530	0.674965	8.14878	5.33716	1.28e-06	7.22e-05	5.21795	7931353	PTPRE	up	5791
532	0.807736	8.11356	5.33522	1.29e-06	7.23e-05	5.21097	7953569	PTPN6	up	5777
535	0.814119	8.09246	5.33289	1.3e-06	7.26e-05	5.20258	8011826	SCIMP	up	388325
537	-0.750043	9.77168	-5.331	1.31e-06	7.27e-05	5.19575	7932796	SVIL	down	6840
539	-0.677885	8.53032	-5.33066	1.31e-06	7.27e-05	5.19454	8173217	ARHGEF9	down	23229
541	-0.709043	10.2322	-5.32873	1.32e-06	7.27e-05	5.18761	8155327	ALDH1B1	down	219
543	-0.65823	4.84732	-5.3286	1.32e-06	7.27e-05	5.18712	8056376	SCN3A	down	6328
545	0.906302	8.5746	5.32515	1.34e-06	7.33e-05	5.17471	7944152	IL10RA	up	3587
546	-0.52859	7.96617	-5.325	1.34e-06	7.33e-05	5.17418	8088979	VGLL3	down	389136
547	-0.913067	9.60638	-5.32454	1.34e-06	7.33e-05	5.17251	7923386	LMOD1	down	25802
549	-0.523919	8.73751	-5.32349	1.35e-06	7.33e-05	5.16873	8167973	HEPH	down	9843
550	0.719385	7.42727	5.32244	1.36e-06	7.35e-05	5.16494	8025076	VAV1	up	7409
552	0.855714	8.78809	5.31935	1.37e-06	7.37e-05	5.15384	8156321	SYK	up	6850
557	-1.09272	7.20444	-5.31667	1.39e-06	7.38e-05	5.14419	7905606	NPR1	down	4881
559	0.954983	9.03124	5.31648	1.39e-06	7.38e-05	5.14351	7935337	PIK3AP1	up	118788
561	-0.657999	8.264	-5.31434	1.4e-06	7.41e-05	5.13579	8127932	TBX18	down	9096
562	-0.559375	6.83702	-5.31387	1.4e-06	7.41e-05	5.13413	8001918	RRAD	down	6236
563	0.58911	7.77422	5.31299	1.41e-06	7.43e-05	5.13094	8157650	PTGS1	up	5742
564	-0.631753	8.90525	-5.31129	1.41e-06	7.45e-05	5.12483	8067233	PMEPA1	down	56937
565	0.727611	7.17107	5.31055	1.42e-06	7.45e-05	5.12218	8099841	TLR6	up	10333
566	-1.07234	10.7488	-5.3104	1.42e-06	7.45e-05	5.12163	8121729	PLN	down	5350
568	0.918192	7.63417	5.30974	1.42e-06	7.45e-05	5.11927	8113130	MCTP1	up	79772
569	0.574809	9.82125	5.30956	1.42e-06	7.45e-05	5.1186	8021208	ME2	up	4200
570	0.977404	11.3445	5.3086	1.43e-06	7.46e-05	5.11516	7977615	RNASE1	up	6035
572	0.818602	7.27722	5.30728	1.44e-06	7.48e-05	5.11041	8069541	SAMSN1	up	64092
574	-0.873356	9.1391	-5.30551	1.45e-06	7.5e-05	5.10405	8117054	CAP2	down	10486
575	0.528031	7.68838	5.30435	1.45e-06	7.5e-05	5.0999	8053484	ST3GAL5	up	8869
576	0.843485	8.91237	5.30413	1.45e-06	7.5e-05	5.09909	7898793	C1QA	up	712
578	-0.736345	8.9905	-5.30298	1.46e-06	7.5e-05	5.09496	7986385	SYNM	down	23336
579	0.684078	7.63819	5.30291	1.46e-06	7.5e-05	5.09471	8025255	STXBP2	up	6813
580	-0.623987	9.28202	-5.30141	1.47e-06	7.52e-05	5.08932	8077490	LMCD1	down	29995
583	0.548232	7.36251	5.29815	1.49e-06	7.56e-05	5.07761	8012605	GAS7	up	8522
586	0.810934	7.33288	5.29582	1.5e-06	7.58e-05	5.06923	7994131	PRKCB	up	5579
587	-0.634164	9.55119	-5.29568	1.5e-06	7.58e-05	5.06872	7956856	MSRB3	down	253827
590	0.574935	5.54889	5.29353	1.51e-06	7.6e-05	5.061	8100210	TXK	up	7294
591	-0.663382	6.20764	-5.29214	1.52e-06	7.63e-05	5.056	7979400	ARMH4	down	145407
593	-0.872289	7.49665	-5.28976	1.54e-06	7.67e-05	5.04745	8008588	HLF	down	3131
594	-0.516692	7.50357	-5.2897	1.54e-06	7.67e-05	5.04725	8059565	PID1	down	55022
595	-0.842439	7.14227	-5.28886	1.54e-06	7.67e-05	5.04423	7932420	HACD1	down	9200
596	-0.756591	7.42687	-5.28876	1.54e-06	7.67e-05	5.04389	7926875	BAMBI	down	25805
598	0.567305	8.93349	5.28598	1.56e-06	7.72e-05	5.03391	8083457	RAP2B	up	5912
599	-0.586276	7.26061	-5.2852	1.56e-06	7.73e-05	5.0311	8066393	JPH2	down	57158
602	-0.512505	8.70485	-5.27753	1.61e-06	7.9e-05	5.00357	8001410	AKTIP	down	64400
603	0.725129	8.24411	5.27729	1.61e-06	7.9e-05	5.0027	8135363	PIK3CG	up	5294
604	0.718887	9.12948	5.27418	1.63e-06	7.98e-05	4.99156	8089911	HCLS1	up	3059
606	0.756316	8.06332	5.27013	1.66e-06	8.07e-05	4.97703	8033605	MYO1F	up	4542
607	-1.27498	6.74826	-5.26946	1.66e-06	8.07e-05	4.97465	8103494	NPY1R	down	4886
608	-0.66616	8.47115	-5.26916	1.66e-06	8.07e-05	4.97354	7979524	TMEM30B	down	161291
610	-0.640868	5.27837	-5.26884	1.66e-06	8.07e-05	4.97242	8020384	GREB1L	down	80000
611	-0.617707	8.08209	-5.26844	1.67e-06	8.07e-05	4.97097	8061227	SLC24A3	down	57419
614	0.757816	9.83369	5.2663	1.68e-06	8.09e-05	4.96329	7950906	CTSC	up	1075
615	0.991795	8.96405	5.26591	1.68e-06	8.09e-05	4.96192	7995096	ITGAM	up	3684
616	-0.604198	7.35513	-5.26471	1.69e-06	8.11e-05	4.9576	8036151	HSPB6	down	126393
620	0.65874	8.77143	5.26041	1.72e-06	8.18e-05	4.94221	8152845	CYRIB	up	51571
621	0.878636	8.46815	5.25968	1.72e-06	8.19e-05	4.93958	8037374	PLAUR	up	5329
622	-0.672803	9.23698	-5.25742	1.74e-06	8.25e-05	4.93148	7901788	NFIA	down	4774
623	-0.500679	7.62863	-5.25675	1.74e-06	8.25e-05	4.92907	8165552	NSMF	down	26012
624	-0.601007	7.07748	-5.25665	1.74e-06	8.25e-05	4.92871	8166289	CDKL5	down	6792
625	-0.871903	7.25095	-5.25387	1.76e-06	8.3e-05	4.91876	8174610	LRCH2	down	57631
626	0.74333	10.7729	5.25298	1.77e-06	8.3e-05	4.91557	8166730	CYBB	up	1536
628	0.82861	8.63254	5.25287	1.77e-06	8.3e-05	4.91519	7940869	FERMT3	up	83706
629	0.60455	5.38726	5.25221	1.77e-06	8.31e-05	4.91281	8125470	HLA-DOB	up	3112
630	0.692477	8.04967	5.25176	1.78e-06	8.31e-05	4.9112	8121277	CRYBG1	up	202
631	-0.844883	7.30976	-5.24946	1.79e-06	8.33e-05	4.90298	7972601	NALCN	down	259232
633	-0.510936	9.40808	-5.24894	1.79e-06	8.33e-05	4.9011	8123678	PXDC1	down	221749
635	0.790629	7.20542	5.24618	1.81e-06	8.36e-05	4.89122	8119016	MAPK13	up	5603
637	0.60091	7.08747	5.24184	1.84e-06	8.47e-05	4.87571	8118111	HCP5	up	10866
639	0.50537	6.73104	5.24028	1.85e-06	8.51e-05	4.8701	8019486	SECTM1	up	6398
640	0.901461	7.6654	5.23988	1.86e-06	8.51e-05	4.86868	7902553	IFI44	up	10561
641	-0.857824	7.54222	-5.2393	1.86e-06	8.52e-05	4.8666	8083546	KCNAB1	down	7881
642	-0.898666	8.62508	-5.23873	1.87e-06	8.52e-05	4.86456	8086051	SUSD5	down	26032
643	0.995518	8.28685	5.2375	1.87e-06	8.54e-05	4.86016	8118324	C2	up	717
644	0.766883	7.85634	5.23731	1.88e-06	8.54e-05	4.85949	8131179	TTYH3	up	80727
646	-0.682894	8.71808	-5.23429	1.9e-06	8.58e-05	4.84868	8036473	PPP1R14A	down	94274
647	0.602241	5.89461	5.23428	1.9e-06	8.58e-05	4.84866	8102232	LEF1	up	51176
649	1.13117	4.95624	5.23393	1.9e-06	8.58e-05	4.84741	8097991	TDO2	up	6999
652	0.726689	9.52703	5.22983	1.93e-06	8.67e-05	4.83273	8112803	LHFPL2	up	10184
656	0.642209	7.07327	5.22865	1.94e-06	8.67e-05	4.82853	8030804	CD33	up	945
657	0.714965	7.31224	5.22796	1.94e-06	8.67e-05	4.82605	8069880	TIAM1	up	7074
658	0.67024	7.24319	5.22783	1.94e-06	8.67e-05	4.8256	8024572	GNA15	up	2769
659	-0.901617	9.6159	-5.22757	1.95e-06	8.67e-05	4.82467	7935188	SORBS1	down	10580
661	-0.712289	6.49823	-5.2258	1.96e-06	8.69e-05	4.81832	7928838	LDB3	down	11155
662	0.915666	10.8895	5.22561	1.96e-06	8.69e-05	4.81767	8004510	CD68	up	968
663	-0.685706	5.72755	-5.22533	1.96e-06	8.69e-05	4.81666	7971104	TRPC4	down	7223
664	-0.699469	11.0067	-5.22418	1.97e-06	8.7e-05	4.81253	8106098	MAP1B	down	4131
667	-0.571999	5.52982	-5.2216	1.99e-06	8.76e-05	4.80334	7936734	FGFR2	down	2263
669	1.17504	7.82218	5.22051	2e-06	8.76e-05	4.79943	7991335	ANPEP	up	290
670	0.500591	9.58344	5.22019	2e-06	8.76e-05	4.79829	8134552	ARPC1B	up	10095
671	-1.44587	8.23919	-5.22014	2e-06	8.76e-05	4.79812	7930714	ATRNL1	down	26033
672	0.605691	10.5079	5.2195	2.01e-06	8.76e-05	4.79582	8066117	SAMHD1	up	25939
674	0.665219	8.38814	5.21808	2.02e-06	8.8e-05	4.79074	7977933	SLC7A8	up	23428
676	-0.71922	7.71065	-5.21703	2.03e-06	8.81e-05	4.78701	7971015	SMAD9	down	4093
679	0.538745	8.90017	5.21481	2.04e-06	8.84e-05	4.77907	7980580	GALC	up	2581
680	0.533369	8.08517	5.2145	2.05e-06	8.84e-05	4.77796	7902883	LRRC8D	up	55144
683	1.47521	6.63702	5.21358	2.05e-06	8.84e-05	4.77467	8083494	MME	up	4311
684	0.573039	7.44014	5.21294	2.06e-06	8.84e-05	4.7724	8068422	DOP1B	up	9980
685	-0.696771	6.75858	-5.21288	2.06e-06	8.84e-05	4.77218	7954065	GPRC5A	down	9052
689	-0.742967	8.51756	-5.21108	2.07e-06	8.85e-05	4.76574	8105585	RNF180	down	285671
691	-0.584537	10.1863	-5.20957	2.08e-06	8.85e-05	4.76036	8098204	CPE	down	1363
692	0.503149	8.58317	5.20921	2.09e-06	8.85e-05	4.75908	8080487	PRKCD	up	5580
693	0.760689	8.01763	5.20776	2.1e-06	8.88e-05	4.7539	8072360	TCN2	up	6948
694	-0.622867	8.24665	-5.20756	2.1e-06	8.88e-05	4.75319	7913593	TCEA3	down	6920
696	0.536351	7.06711	5.20573	2.12e-06	8.91e-05	4.74663	8175177	MBNL3	up	55796
697	0.805927	9.3936	5.20551	2.12e-06	8.91e-05	4.74586	8173287	VSIG4	up	11326
698	-0.603781	8.16752	-5.20531	2.12e-06	8.91e-05	4.74515	7970569	SACS	down	26278
702	0.874049	8.93122	5.20159	2.15e-06	8.99e-05	4.73187	8111739	FYB1	up	2533
704	0.591225	8.60542	5.20063	2.16e-06	9e-05	4.72847	8004521	MPDU1	up	9526
705	0.828811	9.48765	5.20005	2.16e-06	9e-05	4.72638	7942569	SLCO2B1	up	11309
707	-0.508608	8.14532	-5.19941	2.17e-06	9e-05	4.72408	8046461	MAP3K20	down	51776
710	-0.500528	9.44442	-5.19853	2.17e-06	9e-05	4.72095	8023497	ATP8B1	down	5205
711	0.837949	9.26809	5.19663	2.19e-06	9.06e-05	4.71418	7997712	IRF8	up	3394
712	-0.623792	6.22372	-5.19518	2.2e-06	9.08e-05	4.709	8113577	TRIM36	down	55521
720	-0.557481	7.95715	-5.18582	2.28e-06	9.27e-05	4.67563	8008664	AKAP1	down	8165
722	-0.564944	8.32666	-5.18505	2.29e-06	9.27e-05	4.67289	7934477	CAMK2G	down	818
727	0.813472	9.81091	5.18277	2.31e-06	9.27e-05	4.66477	7898799	C1QC	up	714
733	0.51733	8.25278	5.18088	2.32e-06	9.3e-05	4.65806	8140971	SAMD9L	up	219285
734	0.921537	9.83072	5.17862	2.34e-06	9.37e-05	4.65	7906720	FCER1G	up	2207
735	-0.840815	8.18719	-5.17772	2.35e-06	9.38e-05	4.6468	7985522	ADAMTSL3	down	57188
738	0.507822	8.21073	5.17653	2.36e-06	9.39e-05	4.64257	7936529	SHTN1	up	57698
739	-0.932728	6.55235	-5.17644	2.36e-06	9.39e-05	4.64224	8124498	ZNF204P	down	7754
743	-0.518536	7.04751	-5.1716	2.41e-06	9.51e-05	4.625	7933010	PARD3	down	56288
744	-1.043	8.20295	-5.17108	2.41e-06	9.52e-05	4.62314	8085797	THRB	down	7068
745	-0.514064	4.76436	-5.17068	2.42e-06	9.52e-05	4.62172	8175155	FRMD7	down	90167
747	-0.67405	7.53014	-5.16983	2.42e-06	9.53e-05	4.61871	8022338	ADGRA3	down	166647
749	-0.542864	8.01326	-5.16621	2.46e-06	9.64e-05	4.6058	7974425	SAMD4A	down	23034
750	0.538714	8.01002	5.16472	2.47e-06	9.68e-05	4.6005	8050427	CYRIA	up	81553
753	0.586028	8.92461	5.16126	2.5e-06	9.77e-05	4.5882	8096004	BMP2K	up	55589
754	-0.50285	6.82122	-5.16083	2.51e-06	9.78e-05	4.58666	8145005	DMTN	down	2039
755	-0.559011	6.07723	-5.15946	2.52e-06	9.82e-05	4.5818	8083318	LOC646903	down	646903
756	0.680875	9.1729	5.15795	2.54e-06	9.84e-05	4.57641	8118158	AIF1	up	199
757	-0.580818	10.21	-5.15615	2.55e-06	9.88e-05	4.57003	7928444	VCL	down	7414
765	0.971197	9.92936	5.14916	2.62e-06	0.000100559	4.54517	8070826	ITGB2	up	3689
766	-0.525245	5.14312	-5.14869	2.63e-06	0.00010062	4.54352	8001784	CDH8	down	1006
771	0.527256	9.31215	5.1463	2.65e-06	0.000100952	4.53504	8022531	NPC1	up	4864
775	-0.560906	9.57145	-5.13901	2.72e-06	0.000103121	4.50914	8152491	EXT1	down	2131
777	0.979734	7.56086	5.13816	2.73e-06	0.000103167	4.50611	8142452	TFEC	up	22797
780	-0.628064	8.67143	-5.13548	2.76e-06	0.000103866	4.49658	7961339	LRP6	down	4040
784	0.694568	8.79315	5.13282	2.79e-06	0.000104325	4.48714	7984217	PLEKHO2	up	80301
785	-0.50689	7.39388	-5.13254	2.79e-06	0.000104325	4.48616	8058570	KANSL1L	down	151050
786	0.64399	9.09038	5.13252	2.79e-06	0.000104325	4.48609	7958019	DRAM1	up	55332
787	0.718446	6.80096	5.12985	2.82e-06	0.000105147	4.47662	7944722	UBASH3B	up	84959
788	0.666775	7.24903	5.12878	2.83e-06	0.000105457	4.4728	7963313	GALNT6	up	11226
791	0.786518	6.67496	5.1259	2.86e-06	0.00010569	4.46258	8115957	HK3	up	3101
792	0.647651	9.23275	5.12584	2.86e-06	0.00010569	4.46237	8129458	ARHGAP18	up	93663
793	-0.769124	8.13261	-5.12523	2.87e-06	0.000105814	4.46023	8109490	SGCD	down	6444
794	0.610402	6.3057	5.12443	2.88e-06	0.000105899	4.4574	8160889	CCL21	up	6366
798	-0.865388	7.90434	-5.12186	2.91e-06	0.000106463	4.44827	7929388	PLCE1	down	51196
799	0.535297	6.3393	5.12072	2.92e-06	0.000106803	4.44424	8151074	PDE7A	up	5150
801	-0.709501	9.81124	-5.1164	2.97e-06	0.000108324	4.4289	7902512	DNAJB4	down	11080
803	-0.909795	8.49781	-5.11512	2.98e-06	0.000108602	4.42439	8121850	HEY2	down	23493
807	-0.768763	9.70903	-5.11285	3.01e-06	0.000108948	4.41634	8135734	CPED1	down	79974
810	0.686532	8.52398	5.11008	3.04e-06	0.000109618	4.4065	7947815	ACP2	up	53
813	0.912959	8.04625	5.10738	3.07e-06	0.000110382	4.39694	8173444	IL2RG	up	3561
814	-0.779928	8.19659	-5.10293	3.12e-06	0.000112008	4.38119	7902023	RAVER2	down	55225
815	-0.535198	9.43797	-5.10293	3.12e-06	0.000112008	4.38118	8135594	CAV1	down	857
818	-0.843673	9.86906	-5.10097	3.14e-06	0.000112477	4.37423	7927606	PRKG1	down	5592
819	-0.550077	7.83362	-5.09763	3.18e-06	0.000113532	4.36244	8056343	COBLL1	down	22837
824	0.822831	11.12	5.08783	3.3e-06	0.000116525	4.32776	7903893	CD53	up	963
825	-0.623009	10.1754	-5.08773	3.31e-06	0.000116525	4.3274	8090098	MYLK	down	4638
826	-0.721402	7.21715	-5.08712	3.31e-06	0.000116525	4.32524	8157193	ZNF483	down	158399
828	0.511676	6.31226	5.08618	3.33e-06	0.00011679	4.32192	7906107	SEMA4A	up	64218
829	-0.546488	7.2925	-5.08491	3.34e-06	0.000117225	4.31744	8048541	DES	down	1674
832	0.587082	7.1927	5.08318	3.36e-06	0.00011762	4.31132	8072757	CSF2RB	up	1439
833	0.799875	8.40373	5.08283	3.37e-06	0.000117656	4.31006	7897236	KCNAB2	up	8514
835	-0.758011	6.7874	-5.08116	3.39e-06	0.000118089	4.30415	7981998	SNORD116-25	down	100033436
836	0.687721	7.62156	5.08101	3.39e-06	0.000118089	4.30365	8163629	TNFSF8	up	944
837	-0.532895	8.47133	-5.08041	3.4e-06	0.000118236	4.3015	8121087	PM20D2	down	135293
838	-0.50517	6.96203	-5.07914	3.41e-06	0.000118678	4.29702	7944275	TMEM25	down	84866
843	0.745672	9.15922	5.07326	3.49e-06	0.000120704	4.27625	7988789	DMXL2	up	23312
844	0.628317	7.70108	5.07122	3.52e-06	0.000121382	4.26905	7977046	TNFAIP2	up	7127
845	0.845182	8.73336	5.07047	3.53e-06	0.0001216	4.26639	8138689	SKAP2	up	8935
846	0.829598	8.39182	5.06966	3.54e-06	0.000121846	4.26352	8092392	KLHL6	up	89857
849	0.542161	11.8949	5.06563	3.59e-06	0.000123195	4.24931	8030171	FTL	up	2512
850	0.787966	7.64724	5.06514	3.6e-06	0.000123201	4.24758	8137250	GIMAP2	up	26157
855	-0.589992	7.70671	-5.06336	3.62e-06	0.000123201	4.24129	7989094	NEDD4	down	4734
858	0.625368	7.83989	5.06225	3.64e-06	0.000123201	4.23739	8035456	LRRC25	up	126364
860	0.567159	7.53595	5.05915	3.68e-06	0.000124314	4.22645	8136067	TSPAN33	up	340348
861	1.09656	6.0126	5.05851	3.69e-06	0.000124489	4.22417	7910950	KMO	up	8564
864	0.887778	7.67208	5.05506	3.74e-06	0.000125733	4.21199	8041422	RASGRP3	up	25780
865	0.594809	8.98083	5.05449	3.75e-06	0.00012584	4.21	8139859	GUSB	up	2990
866	-0.910443	7.20334	-5.05429	3.75e-06	0.00012584	4.20931	8173600	NAP1L2	down	4674
867	0.788198	8.82515	5.0534	3.76e-06	0.000126135	4.20616	8061668	HCK	up	3055
868	1.09928	8.55962	5.04935	3.82e-06	0.000127943	4.19186	8055980	CYTIP	up	9595
869	0.642683	7.40957	5.04825	3.84e-06	0.000128344	4.18798	8162759	TBC1D2	up	55357
871	0.769328	9.83702	5.04546	3.88e-06	0.00012937	4.17817	7898805	C1QB	up	713
872	-0.677033	6.5022	-5.04511	3.88e-06	0.00012937	4.17693	7908816	LGR6	down	59352
874	-0.755718	11.8196	-5.04453	3.89e-06	0.000129496	4.17489	7999674	MYH11	down	4629
876	1.04339	7.68565	5.04297	3.91e-06	0.000130001	4.16937	8112428	CD180	up	4064
878	-0.542773	6.54082	-5.04052	3.95e-06	0.000130938	4.16076	8126163	KCNK17	down	89822
879	0.793531	8.83297	5.03812	3.98e-06	0.000131995	4.15228	7990757	CTSH	up	1512
880	0.541454	8.64134	5.03649	4.01e-06	0.000132642	4.14655	8044499	SLC20A1	up	6574
881	0.636983	8.29098	5.03609	4.01e-06	0.000132642	4.14515	7951397	CASP1	up	834
882	-0.622845	4.94346	-5.03562	4.02e-06	0.000132699	4.14349	7897675	ANGPTL7	down	10218
883	-0.546334	6.17624	-5.03514	4.03e-06	0.000132699	4.14181	7951429	KBTBD3	down	143879
884	0.860266	8.18903	5.03511	4.03e-06	0.000132699	4.14171	7960771	CD163L1	up	283316
885	-0.605956	7.38604	-5.03342	4.05e-06	0.000133171	4.13573	7950005	MRGPRF	down	116535
889	0.712885	6.98253	5.03015	4.1e-06	0.000133944	4.12424	8072744	NCF4	up	4689
891	-0.561824	7.68024	-5.02979	4.11e-06	0.000133944	4.12298	8132055	MTURN	down	222166
894	0.807635	8.742	5.02835	4.13e-06	0.000134127	4.1179	7950307	UCP2	up	7351
896	-0.918382	8.41203	-5.02808	4.14e-06	0.000134127	4.11693	7988444	MYEF2	down	50804
897	0.908573	6.67146	5.02771	4.14e-06	0.000134143	4.11565	8051396	NLRC4	up	58484
899	0.771075	10.3869	5.02687	4.16e-06	0.000134143	4.11268	8017599	PECAM1	up	5175
900	-0.872014	10.879	-5.02649	4.16e-06	0.000134143	4.11134	8162394	ASPN	down	54829
902	0.53625	6.08253	5.02624	4.17e-06	0.000134143	4.11048	8021376	NEDD4L	up	23327
904	-0.587949	7.62568	-5.02598	4.17e-06	0.000134143	4.10954	8094190	CC2D2A	down	57545
905	0.800374	7.81025	5.0254	4.18e-06	0.000134174	4.10751	7963774	ZNF385A	up	25946
907	0.889255	8.04243	5.02488	4.19e-06	0.000134179	4.10567	8082035	CD86	up	942
908	0.518112	6.63543	5.02395	4.2e-06	0.000134518	4.1024	8107706	LMNB1	up	4001
911	0.67012	8.82534	5.02178	4.24e-06	0.000135067	4.09476	8034420	MAN2B1	up	4125
912	0.756454	7.97963	5.02019	4.26e-06	0.000135642	4.0892	8148059	DEPTOR	up	64798
915	0.99256	11.2479	5.01708	4.31e-06	0.000136584	4.07823	8026971	IFI30	up	10437
917	-0.570066	8.08875	-5.01584	4.33e-06	0.000136956	4.07389	8027439	ZNF507	down	22847
919	-0.52348	4.46983	-5.01474	4.35e-06	0.000137263	4.07001	8098146	NPY5R	down	4889
920	-0.80883	6.49311	-5.01406	4.36e-06	0.000137484	4.06762	7917322	SYDE2	down	84144
930	-0.580677	8.70173	-5.00689	4.48e-06	0.00013977	4.04243	7906954	PBX1	down	5087
931	-0.550683	5.36502	-5.00568	4.5e-06	0.00014011	4.03817	7982392	RYR3	down	6263
932	-0.803797	6.19272	-5.00388	4.53e-06	0.000140825	4.03186	8078529	STAC	down	6769
938	-1.01151	6.7722	-5.00034	4.59e-06	0.000141648	4.01942	8160168	FREM1	down	158326
939	1.26365	8.43029	4.99943	4.61e-06	0.000141999	4.01623	7899160	CD52	up	1043
941	-0.775203	11.3994	-4.99755	4.64e-06	0.000142595	4.00964	8148049	CCN3	down	4856
945	0.753796	5.93636	4.99539	4.68e-06	0.000143236	4.00203	8046124	DHRS9	up	10170
947	1.18604	9.32643	4.99412	4.7e-06	0.000143632	3.99759	8160297	PLIN2	up	123
948	0.895325	7.88028	4.99391	4.7e-06	0.000143632	3.99686	7921667	CD48	up	962
949	0.663224	8.39342	4.99333	4.71e-06	0.000143757	3.99481	8030277	CD37	up	951
950	0.560201	6.68965	4.99262	4.72e-06	0.000143801	3.99232	8075924	MFNG	up	4242
951	0.658672	9.4722	4.99172	4.74e-06	0.000144151	3.98919	7913694	FUCA1	up	2517
954	0.750596	9.33523	4.98785	4.81e-06	0.000145726	3.97558	7942372	FOLR2	up	2350
959	0.707638	8.23644	4.98267	4.9e-06	0.000147632	3.95743	7918487	DENND2D	up	79961
961	0.911331	7.79145	4.98105	4.93e-06	0.000148128	3.95175	8126798	ADGRF5	up	221395
962	0.674184	7.75455	4.98065	4.94e-06	0.000148133	3.95035	8073682	PARVG	up	64098
963	0.650049	11.4285	4.98056	4.94e-06	0.000148133	3.95002	7980958	LGMN	up	5641
965	0.836818	6.41291	4.97893	4.97e-06	0.000148672	3.94432	7921625	SLAMF6	up	114836
971	0.554999	8.39036	4.96977	5.15e-06	0.000152729	3.91222	7928705	TSPAN14	up	81619
973	0.832909	6.88637	4.96951	5.15e-06	0.000152729	3.9113	7918657	PTPN22	up	26191
976	-0.538494	11.2775	-4.96774	5.19e-06	0.000153198	3.9051	7923378	CSRP1	down	1465
977	0.771692	8.9472	4.96773	5.19e-06	0.000153198	3.90509	7948493	SLC15A3	up	51296
981	-0.65111	8.59474	-4.96596	5.22e-06	0.000153534	3.89888	8094789	LIMCH1	down	22998
982	-0.61478	9.12834	-4.96394	5.26e-06	0.000154563	3.89179	8078330	RBMS3	down	27303
983	0.739443	8.34538	4.96297	5.28e-06	0.000154983	3.88842	7950473	ARRB1	up	408
987	0.784644	8.30659	4.96127	5.31e-06	0.000155425	3.88245	8092169	TNFSF10	up	8743
992	0.720452	6.24028	4.95556	5.43e-06	0.000157784	3.86249	8131600	TSPAN13	up	27075
994	-0.587553	9.1221	-4.95513	5.44e-06	0.000157784	3.86097	8160088	MPDZ	down	8777
995	-0.671544	9.16987	-4.95512	5.44e-06	0.000157784	3.86094	7958253	C12orf75	down	387882
996	0.76739	6.93376	4.95393	5.46e-06	0.000158346	3.85679	8084206	B3GNT5	up	84002
997	0.76807	6.77071	4.95311	5.48e-06	0.000158618	3.85391	8099760	ARAP2	up	116984
998	-0.534993	4.76573	-4.95301	5.48e-06	0.000158618	3.85355	8139131	AMPH	down	273
999	-0.729862	9.38477	-4.95247	5.49e-06	0.000158798	3.85167	8117020	MYLIP	down	29116
1001	-0.526409	7.59568	-4.95074	5.52e-06	0.000159412	3.84561	8142524	TSPAN12	down	23554
1003	-0.566053	7.07385	-4.94646	5.61e-06	0.000161557	3.83065	7931031	TACC2	down	10579
1005	0.856618	11.288	4.94549	5.63e-06	0.000161673	3.82726	7971461	LCP1	up	3936
1008	-0.849317	4.29374	-4.94326	5.68e-06	0.000162788	3.81949	7964927	TSPAN8	down	7103
1010	0.698273	8.42094	4.94237	5.7e-06	0.00016291	3.81638	7927186	RASSF4	up	83937
1011	0.775171	7.02045	4.94228	5.7e-06	0.00016291	3.81607	8017867	FAM20A	up	54757
1012	-0.6237	5.79887	-4.94191	5.71e-06	0.00016291	3.81476	8103706	AADAT	down	51166
1014	0.626141	7.28577	4.93785	5.8e-06	0.000165025	3.80057	8086517	CDCP1	up	64866
1018	0.755538	5.99633	4.93657	5.82e-06	0.000165331	3.79613	8096602	DAPP1	up	27071
1019	0.833115	8.32527	4.93547	5.85e-06	0.00016586	3.79226	8029907	C5AR1	up	728
1021	-1.09806	6.58002	-4.93462	5.87e-06	0.00016586	3.7893	8140686	SEMA3D	down	223117
1022	-0.632122	8.11092	-4.93461	5.87e-06	0.00016586	3.78928	7901969	ROR1	down	4919
1024	-0.53403	8.95046	-4.93411	5.88e-06	0.000166006	3.78752	8098581	SNX25	down	83891
1028	0.552173	8.64874	4.93099	5.95e-06	0.000167058	3.77662	8060418	SIRPA	up	140885
1029	0.845106	10.7248	4.93082	5.95e-06	0.000167058	3.77605	8114612	CD14	up	929
1030	-0.51674	8.59915	-4.92981	5.97e-06	0.000167549	3.77251	7940565	FADS2	down	9415
1031	-0.63788	7.93989	-4.92947	5.98e-06	0.00016762	3.77132	7962579	AMIGO2	down	347902
1033	0.649893	6.99813	4.92803	6.01e-06	0.00016824	3.76628	8130539	TAGAP	up	117289
1036	-0.506144	7.86061	-4.92612	6.06e-06	0.00016892	3.75963	7980316	TGFB3	down	7043
1039	1.14032	5.71746	4.92421	6.1e-06	0.000169792	3.75297	8096415	MMRN1	up	22915
1041	0.603141	11.1924	4.92234	6.14e-06	0.00017069	3.74646	8070701	CSTB	up	1476
1043	0.562263	6.52174	4.92054	6.18e-06	0.000171264	3.74018	8020806	RNF125	up	54941
1045	-0.509043	6.13667	-4.91928	6.21e-06	0.000171641	3.73578	8098620	FAM149A	down	25854
1048	-0.679908	5.67269	-4.91741	6.26e-06	0.000172327	3.72925	7975066	AKAP5	down	9495
1052	-0.535956	7.4987	-4.91582	6.29e-06	0.000172759	3.72372	7919669	MTMR11	down	10903
1053	-0.766113	8.80953	-4.91544	6.3e-06	0.000172759	3.7224	7984704	NEO1	down	4756
1054	-0.662117	9.17429	-4.91523	6.31e-06	0.000172759	3.72166	7946589	IRAG1	down	10335
1060	-0.528783	10.9819	-4.91271	6.37e-06	0.000173445	3.71286	8084742	LPP	down	4026
1062	0.589593	7.25354	4.91174	6.39e-06	0.000173784	3.70949	8012558	PIK3R5	up	23533
1064	-0.564331	8.81398	-4.9104	6.42e-06	0.000174263	3.70483	7934570	KCNMA1	down	3778
1072	-0.671497	8.78973	-4.90527	6.54e-06	0.000176429	3.68695	8145669	RBPMS	down	11030
1074	-0.699703	7.45098	-4.9043	6.57e-06	0.000176766	3.68358	7991186	NTRK3	down	4916
1079	-0.62525	6.76491	-4.90014	6.67e-06	0.000178376	3.66908	7949124	PYGM	down	5837
1083	0.592104	8.17669	4.89694	6.75e-06	0.000179643	3.65797	8117106	RNF144B	up	255488
1086	-0.615447	10.3662	-4.89489	6.8e-06	0.00018044	3.65083	8123446	SMOC2	down	64094
1090	0.792975	6.17113	4.89214	6.87e-06	0.000181568	3.64127	8018169	CD300LB	up	124599
1091	-0.554768	6.91124	-4.89179	6.88e-06	0.000181663	3.64004	8102831	MGARP	down	84709
1093	-0.75373	10.7938	-4.89109	6.9e-06	0.000181845	3.63761	8102532	PDE5A	down	8654
1094	-0.525476	6.32018	-4.89056	6.91e-06	0.000182061	3.63575	8072039	MYO18B	down	84700
1095	-0.52428	5.44618	-4.88905	6.95e-06	0.000182938	3.63051	8174141	BEX5	down	340542
1097	0.748093	7.88958	4.88785	6.98e-06	0.000183321	3.62633	7963946	MMP19	up	4327
1098	-0.550842	7.69166	-4.88759	6.99e-06	0.000183353	3.62543	8165911	TBL1X	down	6907
1101	1.89279	9.88082	4.88505	7.05e-06	0.00018457	3.61662	8100827	JCHAIN	up	3512
1103	0.778077	10.8427	4.88475	7.06e-06	0.00018457	3.61555	8156228	CTSL	up	1514
1105	-0.801794	8.68903	-4.88395	7.08e-06	0.000184761	3.61279	8094520	PCDH7	down	5099
1106	-0.513083	7.48331	-4.88383	7.09e-06	0.000184761	3.61237	7999079	ADCY9	down	115
1112	-0.693335	9.19267	-4.87847	7.23e-06	0.000187596	3.59372	8121601	CALHM5	down	254228
1114	-0.662321	6.83254	-4.87609	7.29e-06	0.000188963	3.58545	8163149	PTPN3	down	5774
1115	0.709717	7.99957	4.8758	7.3e-06	0.000189013	3.58448	7897877	TNFRSF1B	up	7133
1116	-0.798146	11.9724	-4.87513	7.32e-06	0.000189106	3.58212	8012475	MYH10	down	4628
1118	0.617244	10.1627	4.875	7.32e-06	0.000189106	3.58169	8028791	PLD3	up	23646
1119	0.64431	8.33316	4.87405	7.35e-06	0.000189512	3.57837	8046380	ITGA6	up	3655
1126	0.53907	8.50233	4.86985	7.46e-06	0.000191442	3.56381	8091260	SLC9A9	up	285195
1127	-0.578147	7.14529	-4.86921	7.48e-06	0.000191753	3.56157	8047784	ZDBF2	down	57683
1130	-0.554583	7.35401	-4.86503	7.6e-06	0.000193973	3.54709	8132860	EGFR	down	1956
1131	0.687255	8.58375	4.86468	7.61e-06	0.000193973	3.54585	8066266	MAFB	up	9935
1133	-0.819499	10.386	-4.86414	7.62e-06	0.000194189	3.54399	7934997	PPP1R3C	down	5507
1134	0.740664	6.85204	4.86389	7.63e-06	0.000194222	3.54312	7970763	FLT1	up	2321
1135	0.850731	6.88065	4.86317	7.65e-06	0.000194591	3.54062	8090823	SLCO2A1	up	6578
1137	1.80744	9.76045	4.86224	7.68e-06	0.000194964	3.5374	8133876	CD36	up	948
1138	0.736864	8.42233	4.86082	7.72e-06	0.000195844	3.53246	7988644	ATP8B4	up	79895
1140	0.727619	7.87994	4.85905	7.77e-06	0.000196684	3.52632	7977786	SLC7A7	up	9056
1145	1.80951	9.36748	4.85492	7.89e-06	0.000198655	3.512	8063115	MMP9	up	4318
1146	-0.801513	6.09475	-4.85456	7.9e-06	0.00019877	3.51075	7938951	ANO5	down	203859
1147	-0.581269	10.0971	-4.85435	7.9e-06	0.000198773	3.51003	7981996	SNORD116-24	down	100033435
1148	-0.844257	9.19503	-4.85198	7.97e-06	0.000200371	3.50182	8171921	DMD	down	1756
1152	-0.710592	6.57562	-4.84946	8.05e-06	0.000201339	3.49308	7982000	SNORD116-26	down	100033438
1153	0.58158	7.23986	4.84906	8.06e-06	0.000201489	3.49168	8016832	MMD	up	23531
1159	-0.577415	7.06464	-4.84587	8.16e-06	0.000202813	3.48063	8114805	FGF1	down	2246
1165	0.753184	8.53133	4.84266	8.25e-06	0.000204168	3.46951	8022118	EPB41L3	up	23136
1169	1.06993	8.70815	4.84106	8.3e-06	0.000204766	3.46399	7995128	ITGAX	up	3687
1172	0.753459	8.26875	4.83926	8.36e-06	0.00020568	3.45774	8025601	ICAM1	up	3383
1173	0.63445	6.91767	4.83642	8.45e-06	0.000207167	3.44794	8126279	TREM2	up	54209
1175	-0.994709	6.5931	-4.83422	8.51e-06	0.000208468	3.4403	7964631	TAFA2	down	338811
1178	-0.632948	6.74154	-4.83292	8.56e-06	0.000208775	3.4358	8133860	GNAI1	down	2770
1180	0.811205	9.77711	4.83231	8.58e-06	0.000208867	3.43369	7948364	MPEG1	up	219972
1184	-0.679476	12.0054	-4.83172	8.59e-06	0.000208867	3.43165	7932254	ITGA8	down	8516
1185	-0.938539	7.11779	-4.83	8.65e-06	0.000209974	3.42571	7947274	MPPED2	down	744
1188	0.802965	8.91579	4.82864	8.69e-06	0.000210637	3.42102	8074237	ADA2	up	51816
1190	-0.547915	11.7884	-4.82577	8.78e-06	0.000212576	3.41107	8136347	CALD1	down	800
1194	0.569986	7.65169	4.82342	8.86e-06	0.000213185	3.40297	7925492	OPN3	up	23596
1196	0.527867	7.74236	4.82263	8.89e-06	0.000213501	3.40023	7996761	PLA2G15	up	23659
1197	0.581878	5.31247	4.822	8.91e-06	0.000213839	3.39806	8098214	TLL1	up	7092
1198	-0.993784	7.57307	-4.82181	8.91e-06	0.000213839	3.39739	8094184	C1QTNF7	down	114905
1200	0.715147	7.64168	4.82067	8.95e-06	0.000214276	3.39346	7959251	P2RX7	up	5027
1201	0.61985	6.8115	4.82047	8.96e-06	0.000214278	3.39278	7963770	GPR84	up	53831
1202	0.857545	8.29353	4.81988	8.98e-06	0.000214395	3.39072	7906486	SLAMF8	up	56833
1203	0.601463	7.57184	4.81978	8.98e-06	0.000214395	3.3904	8104570	OTULINL	up	54491
1206	1.00265	6.60929	4.81848	9.02e-06	0.000214973	3.38589	8101957	EMCN	up	51705
1207	0.560569	7.26236	4.81843	9.03e-06	0.000214973	3.38572	8114010	IRF1	up	3659
1208	-0.591514	7.50177	-4.81799	9.04e-06	0.000215108	3.38419	7932733	MKX	down	283078
1209	0.871743	8.70169	4.81787	9.04e-06	0.000215108	3.38379	8116734	LY86	up	9450
1210	0.733101	8.44911	4.81719	9.07e-06	0.000215497	3.38143	8101304	RASGEF1B	up	153020
1211	-0.536336	6.7344	-4.81654	9.09e-06	0.000215864	3.37917	8107594	SNCAIP	down	9627
1212	0.623981	7.39849	4.81596	9.11e-06	0.000216019	3.37717	8039212	LILRB2	up	10288
1215	0.748769	8.70897	4.81384	9.18e-06	0.000217146	3.36986	7968789	RGCC	up	28984
1219	0.501242	7.77305	4.81147	9.26e-06	0.000218224	3.36167	7941985	TCIRG1	up	10312
1224	-0.678853	8.82237	-4.80644	9.43e-06	0.000221368	3.34431	8099132	CYTL1	down	54360
1226	0.775058	8.97689	4.8034	9.54e-06	0.000223451	3.33383	7957570	PLXNC1	up	10154
1229	0.882485	9.60376	4.80294	9.56e-06	0.000223451	3.33225	7961440	PLBD1	up	79887
1234	-0.639261	9.61136	-4.8003	9.65e-06	0.000224578	3.32314	7932082	CCDC3	down	83643
1238	-0.608115	7.86799	-4.79831	9.72e-06	0.000225429	3.31626	8091972	MECOM	down	2122
1240	-0.830814	6.94835	-4.79643	9.79e-06	0.000226806	3.30977	8041644	PLEKHH2	down	130271
1243	-0.601029	6.72495	-4.79421	9.87e-06	0.000228191	3.30214	7981994	SNORD116-23	down	100033434
1247	-0.588875	9.62186	-4.79244	9.93e-06	0.000228889	3.29604	8097586	GAB1	down	2549
1249	-0.552911	7.23666	-4.79155	9.97e-06	0.000229156	3.29296	8048551	SPEG	down	10290
1250	0.621113	7.39404	4.79137	9.97e-06	0.000229156	3.29236	8165735	CSF2RA	up	1438
1252	-0.75577	6.55725	-4.79054	1e-05	0.000229382	3.2895	7981960	SNORD116-6	down	100033418
1256	-0.570277	8.61279	-4.78905	1.01e-05	0.000230015	3.28434	8058063	RFTN2	down	130132
1258	0.632036	8.37795	4.78536	1.02e-05	0.00023283	3.27163	8157264	SLC31A2	up	1318
1259	-0.69243	8.02407	-4.78512	1.02e-05	0.00023283	3.2708	8108716	PCDHB16	down	57717
1262	-0.52106	8.44694	-4.78331	1.03e-05	0.000233956	3.26459	7965112	PAWR	down	5074
1265	-0.578508	5.23966	-4.77936	1.04e-05	0.000236897	3.25098	8045470	THSD7B	down	80731
1266	0.625634	8.29947	4.77832	1.05e-05	0.000237258	3.24739	7947861	SPI1	up	6688
1269	1.13865	6.57104	4.77646	1.05e-05	0.000238457	3.24101	7986639	LOC102724971	up	102724971
1271	-0.533796	7.49422	-4.77566	1.06e-05	0.000238677	3.23824	8006906	ERBB2	down	2064
1272	-1.08202	8.75534	-4.77538	1.06e-05	0.000238761	3.23727	7987315	ACTC1	down	70
1275	-0.622953	9.54313	-4.77351	1.06e-05	0.000239916	3.23086	8069676	ADAMTS1	down	9510
1278	-0.597217	4.64142	-4.77283	1.07e-05	0.000240032	3.22851	7971922	PCDH9	down	5101
1280	-0.6611	6.63788	-4.77071	1.08e-05	0.000241536	3.22121	8108753	PCDHB15	down	56121
1281	-0.731666	7.97256	-4.76957	1.08e-05	0.000242275	3.21728	8145555	SCARA3	down	51435
1282	-0.704739	11.8722	-4.76846	1.08e-05	0.000243097	3.21348	8162373	OGN	down	4969
1284	0.581089	6.052	4.76807	1.09e-05	0.000243116	3.21215	8114511	MZB1	up	51237
1289	-0.530053	10.39	-4.76554	1.1e-05	0.000244176	3.20345	7981976	SNORD116-14	down	100033426
1290	0.814729	7.79531	4.76536	1.1e-05	0.000244176	3.20283	7912224	SLC2A5	up	6518
1291	0.954283	7.55049	4.7653	1.1e-05	0.000244176	3.20262	8006453	CCL8	up	6355
1292	-0.661952	4.66241	-4.76499	1.1e-05	0.000244217	3.20155	7947230	BDNF	down	627
1293	0.516541	8.66785	4.76484	1.1e-05	0.000244217	3.20102	7908917	BTG2	up	7832
1295	-0.585677	3.78808	-4.76377	1.1e-05	0.000244448	3.19735	7981974	SNORD116-13	down	100033425
1303	-0.573664	7.11464	-4.76152	1.11e-05	0.000245409	3.18962	8108744	PCDHB14	down	56122
1306	-0.6429	8.59416	-4.75679	1.13e-05	0.000249015	3.17338	8057486	PDE1A	down	5136
1307	-0.599302	5.67737	-4.75665	1.13e-05	0.000249015	3.17288	7965226	RASSF9	down	9182
1308	0.559859	9.14631	4.75589	1.14e-05	0.000249293	3.17028	7907702	SOAT1	up	6646
1311	0.754255	8.04646	4.75534	1.14e-05	0.00024946	3.16838	8137244	GIMAP4	up	55303
1312	-0.614394	5.77793	-4.75523	1.14e-05	0.00024946	3.16801	7976012	NRXN3	down	9369
1314	-0.511771	7.26746	-4.75326	1.15e-05	0.000250973	3.16124	8130422	CNKSR3	down	154043
1316	0.538601	5.33438	4.75205	1.15e-05	0.000251754	3.1571	7921434	AIM2	up	9447
1318	-0.685973	6.1284	-4.75031	1.16e-05	0.000252795	3.15111	8095986	ANXA3	down	306
1319	-0.503188	7.17681	-4.75014	1.16e-05	0.000252795	3.15053	8141872	NAPEPLD	down	222236
1320	0.619194	7.58347	4.75007	1.16e-05	0.000252795	3.1503	7969986	TNFSF13B	up	10673
1323	0.776862	6.80027	4.74892	1.17e-05	0.000253402	3.14635	8147132	CA2	up	760
1325	0.913588	8.65319	4.74846	1.17e-05	0.000253592	3.14479	8042942	HK2	up	3099
1328	0.524829	7.56197	4.74594	1.18e-05	0.000255451	3.13612	8140468	GSAP	up	54103
1331	-0.575869	7.39688	-4.74497	1.18e-05	0.000255728	3.13278	7904433	PHGDH	down	26227
1332	0.631751	7.73664	4.74486	1.18e-05	0.000255728	3.13241	8002421	VAC14	up	55697
1333	0.690273	7.4449	4.74476	1.18e-05	0.000255728	3.13207	8034873	ADGRE2	up	30817
1334	0.766259	11.8364	4.74369	1.19e-05	0.000256531	3.12841	7914270	LAPTM5	up	7805
1337	-1.03139	7.6842	-4.7411	1.2e-05	0.000258301	3.11952	8109383	GRIA1	down	2890
1341	-0.539232	7.36548	-4.73967	1.21e-05	0.000259031	3.11461	7897132	PRDM16	down	63976
1343	-0.718461	6.54694	-4.73689	1.22e-05	0.000261349	3.10507	7938608	SPON1	down	10418
1347	-0.592733	5.81529	-4.73531	1.23e-05	0.000261701	3.09968	8094759	NSUN7	down	79730
1348	-0.756729	10.3263	-4.73529	1.23e-05	0.000261701	3.0996	7908204	HMCN1	down	83872
1349	0.862105	9.75612	4.7348	1.23e-05	0.000261835	3.09792	7926410	MRC1	up	4360
1353	0.747118	9.07872	4.73307	1.24e-05	0.000262743	3.092	7927215	ALOX5	up	240
1355	0.767052	7.96088	4.73169	1.24e-05	0.000263654	3.08726	7944931	SLC37A2	up	219855
1357	0.622571	12.4364	4.73046	1.25e-05	0.000264507	3.08304	8149330	CTSB	up	1508
1360	0.617235	7.60317	4.72903	1.25e-05	0.000265387	3.07815	8154245	PDCD1LG2	up	80380
1361	0.874915	8.92753	4.72755	1.26e-05	0.000266531	3.07308	8139033	AOAH	up	313
1364	0.76589	8.20807	4.72547	1.27e-05	0.00026768	3.06595	8103508	MARCHF1	up	55016
1368	0.516922	7.52105	4.72227	1.29e-05	0.000270143	3.05502	8005171	TRPV2	up	51393
1369	-0.542538	6.53395	-4.72159	1.29e-05	0.000270649	3.05268	8127756	LCA5	down	167691
1370	-0.674491	6.9373	-4.71931	1.3e-05	0.000272575	3.04486	8108697	PCDHB5	down	26167
1374	0.56056	7.17608	4.71661	1.31e-05	0.000274253	3.03564	8175933	RENBP	up	5973
1380	-0.748474	5.93027	-4.71276	1.33e-05	0.000276913	3.02246	7943075	FAT3	down	120114
1382	-0.590994	9.82221	-4.71067	1.34e-05	0.000278685	3.01533	8135587	CAV2	down	858
1384	0.596545	7.5923	4.70928	1.35e-05	0.000279584	3.01057	8122265	TNFAIP3	up	7128
1385	0.612538	8.92493	4.70893	1.35e-05	0.000279767	3.00937	7900426	SMAP2	up	64744
1387	-0.548789	4.90843	-4.707	1.36e-05	0.000281393	3.00279	7922301	MYOC	down	4653
1388	0.518874	8.02823	4.70649	1.36e-05	0.000281744	3.00104	8105067	PTGER4	up	5734
1392	0.674369	6.24849	4.70257	1.38e-05	0.0002851	2.98764	7910022	CNIH3	up	149111
1395	0.538302	11.0608	4.70139	1.39e-05	0.000285712	2.98362	8083656	MFSD1	up	64747
1397	-0.971352	7.23082	-4.70108	1.39e-05	0.000285712	2.98253	8150428	SFRP1	down	6422
1399	0.893031	7.15705	4.7008	1.39e-05	0.000285712	2.98159	7982377	GREM1	up	26585
1400	-0.555149	8.46351	-4.69964	1.4e-05	0.000286733	2.97761	8067055	ATP9A	down	10079
1402	1.04046	7.45195	4.69922	1.4e-05	0.000286835	2.97619	8045539	KYNU	up	8942
1406	-0.721347	8.94503	-4.69693	1.41e-05	0.000288535	2.96836	8162404	ECM2	down	1842
1408	0.565337	7.20525	4.69542	1.42e-05	0.000289768	2.96323	7917561	GBP4	up	115361
1409	0.534395	8.0308	4.69419	1.42e-05	0.000290713	2.95902	8133413	LIMK1	up	3984
1413	-0.528694	6.4048	-4.69159	1.44e-05	0.000292459	2.95015	7923596	ETNK2	down	55224
1420	0.743969	8.92988	4.6872	1.46e-05	0.000295809	2.93515	8101992	SLC39A8	up	64116
1422	-0.800011	10.7495	-4.68692	1.46e-05	0.000295809	2.93422	8151816	GEM	down	2669
1423	0.871161	9.74035	4.68649	1.46e-05	0.0002961	2.93273	7922773	NCF2	up	4688
1424	0.737396	9.39894	4.68601	1.47e-05	0.000296438	2.9311	8019912	EMILIN2	up	84034
1430	0.648199	8.72546	4.682	1.49e-05	0.000299173	2.91742	7928429	PLAU	up	5328
1433	-0.692647	6.71566	-4.67929	1.5e-05	0.000301593	2.9082	8096511	BMPR1B	down	658
1440	0.602733	6.22109	4.67625	1.52e-05	0.000303671	2.89784	7918064	COL11A1	up	1301
1441	0.511755	8.20258	4.67609	1.52e-05	0.000303672	2.89728	8148572	LY6E	up	4061
1443	0.588916	7.0161	4.67483	1.53e-05	0.000304701	2.893	7974341	GNG2	up	54331
1446	0.871744	9.18568	4.67262	1.54e-05	0.000306543	2.88548	8036710	GMFG	up	9535
1447	-0.61205	11.2961	-4.67252	1.54e-05	0.000306543	2.88512	8041447	CRIM1	down	51232
1448	0.770139	8.02789	4.67225	1.54e-05	0.000306665	2.88419	7914112	FGR	up	2268
1452	0.859305	8.83072	4.6708	1.55e-05	0.000307184	2.87927	8003667	SERPINF1	up	5176
1453	0.658083	8.3585	4.66954	1.56e-05	0.000308411	2.87499	8116983	CD83	up	9308
1459	-0.681945	7.89722	-4.66663	1.57e-05	0.000309861	2.86506	7963880	ITGA7	down	3679
1460	0.853701	8.87991	4.66488	1.58e-05	0.000311659	2.8591	8138805	CPVL	up	54504
1462	0.686553	7.86206	4.66409	1.59e-05	0.00031218	2.85644	7906377	MNDA	up	4332
1463	0.991557	7.89989	4.6614	1.6e-05	0.000314884	2.84727	8131957	SNX10	up	29887
1464	0.541028	9.49831	4.66094	1.61e-05	0.00031522	2.84572	8112478	NAIP	up	4671
1465	-0.599785	7.8169	-4.6604	1.61e-05	0.000315663	2.84386	7901804	PATJ	down	10207
1467	0.537076	7.17685	4.65951	1.62e-05	0.00031631	2.84085	7981142	CLMN	up	79789
1468	0.60482	6.49835	4.65924	1.62e-05	0.000316436	2.83993	8116559	IRF4	up	3662
1469	0.823869	7.8278	4.65883	1.62e-05	0.000316726	2.83852	8129677	SGK1	up	6446
1477	-0.902042	8.5506	-4.65413	1.65e-05	0.00032049	2.82255	8054439	ST6GAL2	down	84620
1478	-0.925996	7.33755	-4.65191	1.66e-05	0.000322895	2.81502	8077499	LINC00312	down	29931
1481	0.948019	8.7189	4.65088	1.67e-05	0.000323541	2.81151	8031238	LILRB4	up	11006
1488	-1.01924	7.80535	-4.64845	1.68e-05	0.000324902	2.80324	8129071	FRK	down	2444
1492	-0.731615	10.2905	-4.6431	1.72e-05	0.000329742	2.78508	8170119	FHL1	down	2273
1493	0.667034	7.57236	4.64295	1.72e-05	0.000329742	2.78456	8143781	GIMAP6	up	474344
1494	1.13657	6.30936	4.64261	1.72e-05	0.000329951	2.78342	7922229	SELE	up	6401
1496	0.674312	8.69814	4.64075	1.73e-05	0.000331816	2.77708	7968126	LSP1	up	4046
1497	1.11638	6.12088	4.64014	1.73e-05	0.000332263	2.77503	8162059	SLC28A3	up	64078
1498	-0.790405	5.8321	-4.64006	1.73e-05	0.000332263	2.77474	8046792	DUSP19	down	142679
1503	0.741116	8.63302	4.63873	1.74e-05	0.000332916	2.77023	8003903	ARRB2	up	409
1507	1.3013	9.25804	4.63664	1.76e-05	0.000334684	2.76313	8126784	PLA2G7	up	7941
1517	0.937817	6.9477	4.62864	1.81e-05	0.000341939	2.73602	7906613	SLAMF7	up	57823
1518	-0.92811	6.27467	-4.62853	1.81e-05	0.000341939	2.73563	8146839	C8orf34	down	116328
1522	-0.595877	8.49517	-4.62728	1.82e-05	0.000342716	2.73139	8121095	ANKRD6	down	22881
1526	-0.562364	10.934	-4.62544	1.83e-05	0.000344031	2.72517	7997504	CDH13	down	1012
1528	0.553053	7.42544	4.62413	1.84e-05	0.0003451	2.72072	7928589	PPIF	up	10105
1533	0.713757	9.01082	4.62197	1.85e-05	0.000347017	2.71341	8011713	CXCL16	up	58191
1541	-0.556235	8.40419	-4.61766	1.88e-05	0.000350708	2.6988	8151496	ZNF704	down	619279
1542	-0.800174	7.59048	-4.61728	1.88e-05	0.000350991	2.69753	7901720	PRKAA2	down	5563
1544	0.598089	8.12628	4.61595	1.89e-05	0.000352304	2.69299	8143790	TMEM176B	up	28959
1546	-0.617778	6.85304	-4.61444	1.9e-05	0.000353823	2.68789	7965166	PPFIA2	down	8499
1550	-0.508838	9.11007	-4.61281	1.91e-05	0.000354927	2.68237	8166184	CA5B	down	11238
1554	-0.578401	4.59203	-4.61154	1.92e-05	0.000355589	2.67807	8173752	RTL3	down	203430
1556	0.521614	7.59001	4.61123	1.93e-05	0.000355589	2.67704	7928208	SLC29A3	up	55315
1564	-0.69171	6.56167	-4.60705	1.95e-05	0.000358922	2.6629	8167027	RGN	down	9104
1566	0.625237	11.5366	4.60685	1.96e-05	0.000358922	2.66222	7927964	SRGN	up	5552
1567	-0.576956	7.50665	-4.60667	1.96e-05	0.000358922	2.66159	7943376	CEP126	down	57562
1569	0.788629	9.75973	4.60649	1.96e-05	0.000358922	2.66101	7960865	SLC2A3	up	6515
1571	0.549466	9.87069	4.60622	1.96e-05	0.000358922	2.66007	7910680	GPR137B	up	7107
1572	0.665049	8.56248	4.60548	1.97e-05	0.000359685	2.65757	7973067	PNP	up	4860
1576	-0.505825	8.0888	-4.60342	1.98e-05	0.000361389	2.65059	8048995	ITM2C	down	81618
1578	0.698379	6.14728	4.60242	1.99e-05	0.000362301	2.64722	8089568	CD200R1	up	131450
1581	0.663183	7.58578	4.59993	2.01e-05	0.000364979	2.6388	7966127	SELPLG	up	6404
1583	-1.06529	7.23561	-4.59898	2.01e-05	0.000365839	2.63558	8095303	ADGRL3	down	23284
1587	-0.78595	6.68749	-4.59378	2.05e-05	0.00037157	2.61801	8108693	PCDHB4	down	56131
1589	0.784242	10.6339	4.59296	2.06e-05	0.000372258	2.61527	7919800	CTSS	up	1520
1591	-0.938369	7.85667	-4.59245	2.06e-05	0.000372549	2.61352	7988563	SHC4	down	399694
1593	0.607734	7.51545	4.5914	2.07e-05	0.000373556	2.60999	8174076	GLA	up	2717
1595	-0.513307	6.12053	-4.58936	2.08e-05	0.000375916	2.6031	8147057	CHMP4C	down	92421
1597	0.791817	9.80677	4.58778	2.1e-05	0.000377664	2.59775	7908553	PTPRC	up	5788
1599	0.553312	6.06191	4.58617	2.11e-05	0.000379453	2.59233	8180196	LILRA6	up	79168
1600	0.75952	7.34643	4.58517	2.12e-05	0.000380619	2.58896	8102328	CFI	up	3426
1602	-0.528315	7.47756	-4.58374	2.13e-05	0.000382181	2.58412	8078386	GPD1L	down	23171
1604	0.79323	9.50139	4.58189	2.14e-05	0.000384123	2.57788	7961829	BCAT1	up	586
1606	0.549226	7.37348	4.58115	2.15e-05	0.000384739	2.57537	8175900	ARHGAP4	up	393
1612	-0.635593	8.75297	-4.57654	2.18e-05	0.000389519	2.55983	7981949	SNORD116-1	down	100033413
1615	-0.605499	6.76389	-4.57378	2.2e-05	0.000392218	2.55055	8120932	PRSS35	down	167681
1616	0.64449	7.34338	4.57374	2.21e-05	0.000392218	2.55039	8137232	GIMAP8	up	155038
1619	-0.628966	7.97031	-4.57168	2.22e-05	0.000394501	2.54347	8047248	PLCL1	down	5334
1621	0.544258	8.34591	4.57101	2.23e-05	0.000395038	2.5412	7995258	ZNF267	up	10308
1625	0.631486	7.61651	4.57002	2.23e-05	0.00039561	2.53787	8149638	DOK2	up	9046
1629	-0.634269	6.1724	-4.56741	2.26e-05	0.000398508	2.52907	7973985	MIPOL1	down	145282
1633	0.692635	7.47334	4.56473	2.28e-05	0.000401307	2.52006	8031223	LILRB1	up	10859
1634	0.914528	6.98968	4.56453	2.28e-05	0.000401393	2.51937	7972557	GPR183	up	1880
1637	0.823661	9.7324	4.56365	2.29e-05	0.000402034	2.5164	8030866	FPR3	up	2359
1638	-0.515262	10.1935	-4.56222	2.3e-05	0.000403665	2.51159	7925954	NET1	down	10276
1644	-0.541812	7.89818	-4.56098	2.31e-05	0.000404417	2.50743	7964602	LRIG3	down	121227
1649	0.584522	7.7833	4.55872	2.33e-05	0.000406451	2.49981	8009243	MILR1	up	284021
1650	0.691236	10.6107	4.5581	2.33e-05	0.000406856	2.49773	7960874	C3AR1	up	719
1651	-0.516827	8.83188	-4.55786	2.34e-05	0.000406858	2.49692	7963567	KRT8	down	3856
1653	-0.506293	10.658	-4.55711	2.34e-05	0.000407323	2.49439	7908924	PRELP	down	5549
1657	0.79525	8.46424	4.55283	2.38e-05	0.000412569	2.48	8113358	ST8SIA4	up	7903
1662	0.64305	9.52598	4.55029	2.4e-05	0.00041529	2.47144	8125537	HLA-DMA	up	3108
1665	0.636929	7.3091	4.54744	2.42e-05	0.000418909	2.46188	7937150	ADAM8	up	101
1666	0.937282	8.26915	4.54695	2.43e-05	0.000419438	2.46022	7940237	MS4A4A	up	51338
1670	0.638248	7.78959	4.54501	2.45e-05	0.000421299	2.45372	8096808	MCUB	up	55013
1671	0.632217	6.95933	4.54482	2.45e-05	0.000421299	2.45307	7996264	CDH5	up	1003
1672	0.531468	5.81995	4.54476	2.45e-05	0.000421299	2.45287	8001133	SHCBP1	up	79801
1673	-0.606211	6.72971	-4.54471	2.45e-05	0.000421299	2.45271	7916944	PTGER3	down	5733
1674	0.757236	7.27502	4.54249	2.47e-05	0.000424459	2.44525	7939751	NR1H3	up	10062
1675	-0.714008	9.6325	-4.5418	2.47e-05	0.000425305	2.44291	8127201	COL21A1	down	81578
1683	0.540888	5.80534	4.53564	2.53e-05	0.000432823	2.42222	7923917	FCMR	up	9214
1690	0.68395	7.30147	4.53184	2.56e-05	0.000436979	2.40948	8030782	SIGLEC9	up	27180
1698	0.855368	9.62719	4.52715	2.61e-05	0.000442274	2.39376	8043197	VAMP8	up	8673
1703	0.695251	7.66887	4.52479	2.63e-05	0.000444995	2.38585	8124527	H1-5	up	3009
1704	-0.55261	7.46456	-4.52435	2.63e-05	0.000445478	2.38436	8140709	ELAPOR2	down	222223
1709	-0.609643	5.18118	-4.51984	2.68e-05	0.00045138	2.36924	7951363	CASP12	down	100506742
1715	0.975793	7.73915	4.51653	2.71e-05	0.000455156	2.35817	7945204	ST14	up	6768
1719	-0.561296	8.1802	-4.51388	2.74e-05	0.000458181	2.34929	8104035	SORBS2	down	8470
1723	0.553917	8.08195	4.5111	2.76e-05	0.000462026	2.33996	8025183	MCOLN1	up	57192
1726	0.654944	5.88876	4.50961	2.78e-05	0.000463802	2.33498	8079407	CCRL2	up	9034
1727	-0.578143	5.5511	-4.50913	2.78e-05	0.000464368	2.33337	8108981	STK32A	down	202374
1729	0.588395	6.94025	4.507	2.8e-05	0.000467452	2.32626	7922219	SELL	up	6402
1741	0.531427	10.1314	4.50174	2.86e-05	0.000473034	2.30866	8108217	TGFBI	up	7045
1742	0.501772	6.90589	4.50048	2.87e-05	0.000474117	2.30444	7898115	TMEM51	up	55092
1757	-0.636371	6.36946	-4.49398	2.94e-05	0.000481352	2.28271	8112668	GCNT4	down	51301
1761	-0.544117	8.18267	-4.49134	2.97e-05	0.000484738	2.27388	7977273	ADSS1	down	122622
1762	0.594363	8.56095	4.4912	2.97e-05	0.000484742	2.27342	8090591	PLXND1	up	23129
1764	0.783949	11.1451	4.48935	2.99e-05	0.000487235	2.26724	8123744	F13A1	up	2162
1765	0.564766	9.19911	4.48935	2.99e-05	0.000487235	2.26724	8156199	DAPK1	up	1612
1774	1.00337	8.35709	4.48598	3.02e-05	0.00049075	2.25599	8034304	ACP5	up	54
1776	0.690976	10.6933	4.48475	3.04e-05	0.000492438	2.25188	8166469	SAT1	up	6303
1777	0.600385	8.30069	4.48407	3.04e-05	0.000493403	2.2496	7898161	EFHD2	up	79180
1778	0.566587	4.56408	4.48315	3.05e-05	0.000494642	2.24655	7919787	HORMAD1	up	84072
1782	0.622342	8.62544	4.48006	3.09e-05	0.000498663	2.23624	8113214	GLRX	up	2745
1787	0.971371	8.32937	4.47839	3.11e-05	0.000500348	2.23068	8162502	FBP1	up	2203
1789	-0.602037	8.32979	-4.47803	3.11e-05	0.000500509	2.22948	7909789	TGFB2	down	7042
1794	-0.575907	9.1842	-4.47506	3.14e-05	0.000504251	2.21955	8122099	ENPP1	down	5167
1797	-0.650139	8.86703	-4.47465	3.15e-05	0.000504251	2.21818	8091306	PLSCR4	down	57088
1798	0.776731	7.30395	4.4746	3.15e-05	0.000504251	2.21804	8089771	CD80	up	941
1799	-0.502911	7.78779	-4.4736	3.16e-05	0.000505566	2.21468	8149413	DLC1	down	10395
1809	-0.604396	6.36805	-4.46657	3.24e-05	0.000515459	2.19127	8045795	KCNJ3	down	3760
1811	0.659914	10.7478	4.46603	3.25e-05	0.000515487	2.18948	8109344	GM2A	up	2760
1813	-0.63837	5.81143	-4.46569	3.25e-05	0.0005156	2.18835	8155673	PIP5K1B	down	8395
1816	-0.662338	7.07928	-4.46407	3.27e-05	0.000517869	2.18292	8168968	GPRASP1	down	9737
1818	0.633755	6.97757	4.46334	3.28e-05	0.000518727	2.18049	8132347	GPR141	up	353345
1819	0.657643	7.32319	4.4619	3.29e-05	0.000520896	2.17572	7975799	FLVCR2	up	55640
1832	0.539249	7.50731	4.45353	3.39e-05	0.000532911	2.14786	8176234	CLIC2	up	1193
1835	0.735551	8.87931	4.4529	3.4e-05	0.000533588	2.14577	7973101	RNASE6	up	6039
1837	-0.599596	5.93497	-4.45162	3.42e-05	0.00053553	2.14151	7902452	AK5	down	26289
1840	-0.527748	6.29795	-4.44871	3.45e-05	0.000540099	2.13184	8108733	PCDHB12	down	56124
1850	1.04631	7.56421	4.44188	3.54e-05	0.000550297	2.10916	8101126	CXCL10	up	3627
1852	-1.00131	9.38501	-4.43936	3.57e-05	0.000554755	2.10077	8146967	CRISPLD1	down	83690
1860	-0.530422	8.93374	-4.43602	3.61e-05	0.000559041	2.08969	8034130	KANK2	down	25959
1864	0.588427	8.60148	4.43107	3.68e-05	0.000567136	2.07326	8064790	RASSF2	up	9770
1866	0.532668	7.37157	4.43031	3.69e-05	0.000568146	2.07074	7938812	TMEM86A	up	144110
1872	0.563951	3.9645	4.42776	3.72e-05	0.000571738	2.06228	8100943	RASSF6	up	166824
1880	0.97451	6.94312	4.42208	3.8e-05	0.000580805	2.04344	7917182	ADGRL4	up	64123
1881	0.781708	8.85493	4.42204	3.8e-05	0.000580805	2.04333	8137264	TMEM176A	up	55365
1885	-0.70367	8.0382	-4.41938	3.83e-05	0.000584898	2.0345	7901272	CYP4X1	down	260293
1893	0.517424	6.73056	4.41158	3.94e-05	0.000597869	2.00867	7909455	TRAF3IP3	up	80342
1897	0.864041	7.19174	4.40985	3.97e-05	0.000600459	2.00295	7917576	GBP5	up	115362
1900	0.515945	4.29856	4.40767	4e-05	0.000604286	1.99576	8046099	NOSTRIN	up	115677
1902	0.847322	8.84938	4.40714	4e-05	0.000604894	1.99397	7952022	JAML	up	120425
1903	0.607662	8.41234	4.40682	4.01e-05	0.000605287	1.99295	7974816	SLC38A6	up	145389
1905	1.83293	7.9559	4.40608	4.02e-05	0.000606349	1.99047	7951217	MMP7	up	4316
1906	0.690153	8.62498	4.40539	4.03e-05	0.00060754	1.98822	8124531	H3C11	up	8354
1911	-0.514614	11.292	-4.40173	4.08e-05	0.000612907	1.9761	8140463	FGL2	down	10875
1912	-0.65169	9.25931	-4.40164	4.08e-05	0.000612907	1.9758	8089011	PROS1	down	5627
1913	-0.690144	10.3764	-4.40151	4.08e-05	0.000612907	1.97538	8013341	MFAP4	down	4239
1916	-0.752842	8.75751	-4.40125	4.09e-05	0.000612907	1.97452	8023727	DSEL	down	92126
1917	0.69734	5.80159	4.40114	4.09e-05	0.000612907	1.97413	8101429	PLAC8	up	51316
1918	0.650814	6.03209	4.40046	4.1e-05	0.000614107	1.97189	8140668	SEMA3A	up	10371
1920	1.4104	6.53669	4.39972	4.11e-05	0.000615159	1.96946	8147145	ATP6V0D2	up	245972
1922	0.551937	8.01935	4.39712	4.15e-05	0.000619759	1.96085	8003322	CYBA	up	1535
1925	-0.53523	9.21567	-4.39624	4.16e-05	0.000620844	1.95796	8022674	CDH2	down	1000
1926	0.739497	6.67899	4.39484	4.18e-05	0.000623295	1.95333	7974366	PTGER2	up	5732
1928	-0.513854	8.71042	-4.39385	4.2e-05	0.000623901	1.95005	8071981	KIAA1671	down	85379
1931	0.662564	8.7834	4.39255	4.22e-05	0.000625854	1.94578	8099834	TLR1	up	7096
1944	0.677588	7.9833	4.38268	4.37e-05	0.000643441	1.91318	7976443	IFI27	up	3429
1950	0.65155	7.08291	4.37871	4.43e-05	0.000650723	1.9001	8117594	H2BC14	up	8342
1955	0.556436	6.90814	4.3748	4.49e-05	0.000658334	1.88722	7929052	IFIT3	up	3437
1965	-0.553803	5.80938	-4.36908	4.58e-05	0.000667686	1.86838	8108737	PCDHB13	down	56123
1969	0.544063	11.7565	4.36603	4.63e-05	0.000674037	1.85832	7945666	CTSD	up	1509
1973	0.889869	11.4575	4.36471	4.65e-05	0.000676003	1.85398	7957023	LYZ	up	4069
1977	0.585463	7.62887	4.36343	4.67e-05	0.000677872	1.84979	7938390	ADM	up	133
1983	-0.653568	8.11075	-4.35919	4.74e-05	0.000685885	1.83583	8143127	FAM180A	down	389558
1986	0.643369	9.07389	4.35893	4.75e-05	0.000686055	1.83497	8046695	ITGA4	up	3676
1987	-0.501153	8.45095	-4.35873	4.75e-05	0.000686247	1.83431	8026139	NFIX	down	4784
1988	0.631686	5.7876	4.35829	4.76e-05	0.000687022	1.83285	7908968	LAX1	up	54900
1995	0.511961	8.23458	4.35603	4.8e-05	0.000690136	1.82542	8076690	KIAA0930	up	23313
1996	-0.506997	5.1102	-4.35574	4.8e-05	0.000690335	1.82448	8100131	GABRA4	down	2557
1999	-0.601423	8.30837	-4.35534	4.81e-05	0.000690621	1.82316	8107646	PRDM6	down	93166
2005	0.501921	5.92426	4.35122	4.88e-05	0.000698922	1.80963	8124280	RIPOR2	up	9750
2006	0.729938	6.78526	4.35021	4.9e-05	0.000701111	1.80632	7946446	NRIP3	up	56675
2015	0.504407	7.67512	4.34662	4.96e-05	0.00070642	1.7945	7953878	CLEC2D	up	29121
2016	0.774653	9.43101	4.34562	4.98e-05	0.000708305	1.79123	8014063	EVI2B	up	2124
2019	0.518859	7.11156	4.34492	4.99e-05	0.000709044	1.78894	8064451	SIRPB2	up	284759
2020	-0.700206	7.51928	-4.34484	4.99e-05	0.000709044	1.78867	8111569	RANBP3L	down	202151
2030	0.596552	6.47533	4.33841	5.11e-05	0.000721824	1.76756	7914950	CSF3R	up	1441
2034	-0.638086	9.30355	-4.33616	5.15e-05	0.000726109	1.7602	7954481	SSPN	down	8082
2036	0.560203	6.75289	4.33413	5.18e-05	0.000730542	1.75353	7928308	DDIT4	up	54541
2037	-0.67049	9.62843	-4.33408	5.18e-05	0.000730542	1.75335	8126760	RCAN2	down	10231
2038	-0.534504	6.35059	-4.33367	5.19e-05	0.000731275	1.75202	8050619	APOB	down	338
2042	0.805648	8.93417	4.33209	5.22e-05	0.000733807	1.74684	8106354	IQGAP2	up	10788
2047	-0.533511	3.65377	-4.32889	5.28e-05	0.000740556	1.73636	7981972	SNORD116-12	down	100033424
2050	0.854546	7.9327	4.32673	5.32e-05	0.000745276	1.72927	7960464	VWF	up	7450
2053	-0.513056	5.30605	-4.32454	5.36e-05	0.000750096	1.7221	7971866	DIAPH3	down	81624
2062	1.00736	7.64469	4.31895	5.47e-05	0.000761165	1.70379	7909371	CR1	up	1378
2063	-0.549101	7.21885	-4.31851	5.48e-05	0.000762006	1.70237	8167998	AR	down	367
2074	0.820265	9.82548	4.31311	5.58e-05	0.000772419	1.6847	8053417	CAPG	up	822
2075	-0.576108	7.66234	-4.31185	5.61e-05	0.000775541	1.68056	8106210	ARHGEF28	down	64283
2081	-0.568089	9.48437	-4.31014	5.64e-05	0.000778251	1.675	8152703	FBXO32	down	114907
2083	0.689719	7.30522	4.3098	5.65e-05	0.000778542	1.67388	8014066	EVI2A	up	2123
2085	0.780656	6.8533	4.30908	5.66e-05	0.000779884	1.67151	7976080	GPR65	up	8477
2104	0.515755	9.05501	4.29639	5.92e-05	0.000807384	1.63008	8075217	AP1B1	up	162
2108	0.814088	5.45765	4.29543	5.94e-05	0.000808785	1.62694	7990818	BCL2A1	up	597
2113	0.596746	7.79846	4.29049	6.04e-05	0.000819903	1.61083	7945146	KCNJ5	up	3762
2114	-0.832751	6.34217	-4.29032	6.05e-05	0.000820064	1.61026	8174598	IL13RA2	down	3598
2115	-0.576842	7.36911	-4.29002	6.05e-05	0.000820144	1.60929	7961710	ABCC9	down	10060
2116	0.53279	9.00462	4.28997	6.05e-05	0.000820144	1.60913	8054135	MGAT4A	up	11320
2117	-0.643416	6.351	-4.28985	6.06e-05	0.000820144	1.60872	7982006	SNORD116-29	down	100033821
2120	0.526064	5.24353	4.28878	6.08e-05	0.00082248	1.60526	8054580	BUB1	up	699
2124	0.727867	8.42634	4.28651	6.13e-05	0.000827688	1.59786	8145293	ADAM28	up	10863
2131	-0.513775	7.04841	-4.28403	6.18e-05	0.000832585	1.58975	8101788	UNC5C	down	8633
2137	0.517443	8.03318	4.28169	6.23e-05	0.000837379	1.58216	7943413	BIRC3	up	330
2139	0.518488	8.46553	4.28072	6.25e-05	0.000839554	1.579	8116484	MGAT1	up	4245
2140	0.63037	4.58797	4.28057	6.26e-05	0.000839662	1.5785	8131682	ABCB5	up	340273
2154	0.855824	7.49162	4.27275	6.43e-05	0.000857689	1.55302	8048283	SLC11A1	up	6556
2155	-0.57099	7.61441	-4.27098	6.47e-05	0.000862075	1.54728	8078461	FBXL2	down	25827
2157	0.629615	6.61588	4.26972	6.5e-05	0.000865189	1.54319	8069668	CYYR1	up	116159
2165	0.567283	9.25698	4.26581	6.59e-05	0.00087364	1.53046	7914127	IFI6	up	2537
2173	0.718507	8.65781	4.2635	6.64e-05	0.00087826	1.52295	8022711	DSC2	up	1824
2174	-0.676735	9.98717	-4.26317	6.65e-05	0.000878902	1.5219	8162388	OMD	down	4958
2184	0.502743	6.30168	4.26016	6.72e-05	0.000883664	1.51209	8012013	CLEC10A	up	10462
2187	-0.525344	8.73755	-4.25993	6.72e-05	0.000883664	1.51136	8041206	LBH	down	81606
2188	0.592994	7.61853	4.25967	6.73e-05	0.000884131	1.5105	7967544	SCARB1	up	949
2190	0.555323	8.50137	4.25855	6.76e-05	0.000886881	1.50688	8003171	COTL1	up	23406
2193	0.621581	5.01667	4.2574	6.78e-05	0.000889048	1.50315	7921237	FCRL5	up	83416
2212	0.68978	7.2359	4.24736	7.03e-05	0.000913766	1.47056	8139433	MYO1G	up	64005
2213	0.799245	3.97179	4.2473	7.03e-05	0.000913766	1.47037	7940253	MS4A6E	up	245802
2214	1.00755	5.94311	4.24658	7.05e-05	0.000915696	1.46804	8105084	C7	up	730
2215	-0.577636	7.44817	-4.24585	7.06e-05	0.000917692	1.46566	8108720	PCDHB9	down	56127
2217	0.582034	5.88138	4.24505	7.08e-05	0.000919181	1.46306	7906348	CD1C	up	911
2221	-0.587884	6.72155	-4.24275	7.14e-05	0.00092442	1.45561	8078155	GALNT15	down	117248
2223	1.21788	7.17799	4.24013	7.21e-05	0.000931464	1.44711	8043443	IGKV2-24	up	28923
2231	-0.66032	7.92167	-4.2352	7.33e-05	0.000944294	1.43116	8088560	ADAMTS9	down	56999
2235	0.529243	9.55474	4.2337	7.37e-05	0.000947794	1.42628	7954090	EMP1	up	2012
2237	0.768367	7.82123	4.233	7.39e-05	0.000949366	1.42403	8121515	SLC16A10	up	117247
2248	-0.553025	4.66266	-4.22719	7.54e-05	0.000963551	1.40524	7952315	MIR100	down	406892
2253	0.888021	8.31488	4.22367	7.63e-05	0.000972534	1.39384	7902541	IFI44L	up	10964
2265	-0.507289	6.64886	-4.21623	7.83e-05	0.000993404	1.36979	8173812	HMGN5	down	79366
2269	-0.627823	8.07751	-4.21278	7.93e-05	0.00100348	1.35864	8152119	NCALD	down	83988
2270	0.814852	8.51396	4.21259	7.93e-05	0.00100376	1.35803	7985317	CEMIP	up	57214
2271	0.67176	6.54041	4.21127	7.97e-05	0.00100798	1.35378	7918457	KCNA3	up	3738
2275	0.515033	5.55871	4.2094	8.02e-05	0.00101261	1.34776	7899499	RAB42	up	115273
2292	0.669792	6.71333	4.20012	8.28e-05	0.00103831	1.31782	8077899	PPARG	up	5468
2296	0.666763	10.0282	4.19735	8.36e-05	0.00104675	1.3089	7948455	MS4A6A	up	64231
2302	0.506893	12.1482	4.19254	8.5e-05	0.00105999	1.2934	8115147	CD74	up	972
2310	-0.541939	9.77024	-4.18462	8.74e-05	0.00108551	1.26792	8042788	ACTG2	down	72
2317	0.78791	6.56576	4.1799	8.88e-05	0.00110004	1.25272	7951686	IL18	up	3606
2320	0.595332	7.00682	4.17875	8.92e-05	0.00110279	1.24902	7987145	FMN1	up	342184
2325	-0.500315	8.36575	-4.17268	9.11e-05	0.00112245	1.22953	8155946	VPS13A	down	23230
2328	0.586461	6.13819	4.17223	9.12e-05	0.00112293	1.2281	7984524	PAQR5	up	54852
2330	0.530007	7.72132	4.17166	9.14e-05	0.00112433	1.22626	8148317	MYC	up	4609
2336	0.700647	8.84941	4.16721	9.28e-05	0.00113839	1.21198	7906757	FCGR2A	up	2212
2351	-0.521128	6.66439	-4.15916	9.54e-05	0.00116366	1.18615	8127502	LINC00472	down	79940
2355	0.608978	4.364	4.15692	9.62e-05	0.00117097	1.17898	8143555	OR9A2	up	135924
2358	0.748486	7.55431	4.15363	9.73e-05	0.00118261	1.16844	7905571	S100A9	up	6280
2363	-0.608213	6.79462	-4.14831	9.91e-05	0.00120148	1.1514	8144742	MICU3	down	286097
2368	0.597822	6.5908	4.14657	9.97e-05	0.00120693	1.14583	7991602	PCSK6	up	5046
2376	-0.704833	6.07048	-4.13968	0.000102077	0.00123147	1.1238	7921909	CCDC190	down	339512
2377	-1.09502	8.22015	-4.1389	0.000102352	0.00123434	1.1213	8098021	GRIA2	down	2891
2381	0.615908	6.8174	4.13663	0.000103157	0.00124156	1.11403	7953723	CLEC4A	up	50856
2382	-0.583114	5.82961	-4.1366	0.000103165	0.00124156	1.11396	8135544	FOXP2	down	93986
2394	-0.530132	9.26488	-4.12877	0.000105984	0.00127032	1.08895	7951351	PDGFD	down	80310
2408	0.909289	7.05844	4.12412	0.000107695	0.00128344	1.0741	8017843	SLC16A6	up	9120
2409	-0.739355	10.7691	-4.12395	0.000107757	0.00128372	1.07356	8057506	FRZB	down	2487
2416	0.607285	6.10566	4.11998	0.000109237	0.00129763	1.06091	7937020	MKI67	up	4288
2423	0.535194	6.04014	4.11608	0.000110712	0.00131142	1.04847	8122860	MYCT1	up	80177
2439	-0.62915	8.11038	-4.10635	0.000114476	0.00134736	1.01748	7953765	RIMKLB	down	57494
2446	-0.541051	10.5951	-4.10311	0.000115754	0.00135856	1.00718	8058869	TNS1	down	7145
2449	-0.539866	6.78301	-4.10078	0.000116684	0.00136803	0.999764	8119357	DAAM2	down	23500
2466	0.530718	8.38304	4.09097	0.000120675	0.00140395	0.96859	7988414	GATM	up	2628
2470	0.823992	8.31815	4.08673	0.00012244	0.00142037	0.95513	7906777	FCGR2B	up	2213
2495	0.689251	8.05844	4.07399	0.000127893	0.00146894	0.914748	8047677	CD28	up	940
2496	0.608088	10.3778	4.07286	0.000128391	0.00147415	0.91115	8125530	HLA-DMB	up	3109
2497	-0.50814	5.71369	-4.07253	0.000128534	0.00147529	0.910115	7972650	FGF14	down	2259
2509	-0.600322	7.41207	-4.06814	0.000130476	0.00149089	0.89622	8160040	PTPRD	down	5789
2514	0.518148	5.99394	4.06725	0.000130875	0.00149289	0.893396	8156290	CKS2	up	1164
2533	0.544493	6.45762	4.05583	0.000136078	0.00154043	0.857278	7965873	IGF1	up	3479
2544	0.704198	7.21751	4.05225	0.00013775	0.00155322	0.845969	7961120	CLEC7A	up	64581
2552	-0.589416	4.25539	-4.04541	0.000141	0.00158503	0.824371	7982094	SNORD115-44	down	100033818
2554	0.690619	8.32385	4.04344	0.00014195	0.00159464	0.818147	7937335	IFITM1	up	8519
2555	0.811264	10.3332	4.04102	0.000143125	0.00160675	0.810517	8066619	PLTP	up	5360
2559	0.643852	6.42488	4.03925	0.000143988	0.00161405	0.804948	8042637	DYSF	up	8291
2561	0.96012	7.9563	4.0389	0.000144159	0.00161509	0.803851	8144917	LPL	up	4023
2572	0.505106	6.89177	4.03604	0.00014557	0.00162488	0.794833	8039180	LILRB5	up	10990
2573	-0.688786	8.54861	-4.03558	0.000145798	0.00162664	0.793384	7943984	ZBTB16	down	7704
2596	1.40313	5.54171	4.0262	0.000150521	0.00166343	0.763865	7951246	MMP8	up	4317
2600	0.953876	8.34254	4.02549	0.000150885	0.00166507	0.761632	8051583	CYP1B1	up	1545
2605	0.922275	5.23155	4.02454	0.000151373	0.00166786	0.758641	8044212	SULT1C2	up	6819
2607	0.521021	8.53099	4.02219	0.000152591	0.00167905	0.751225	7985493	TM6SF1	up	53346
2631	0.688926	7.66876	4.00903	0.000159561	0.00173965	0.709883	7933872	EGR2	up	1959
2637	-0.569209	7.23152	-4.00544	0.000161514	0.00175749	0.698626	7918379	GSTM3	down	2947
2660	1.26032	9.12556	3.99482	0.00016743	0.00180424	0.66534	7983910	AQP9	up	366
2665	-0.561307	5.97943	-3.99437	0.000167682	0.00180488	0.663948	8115600	ZBED8	down	63920
2686	0.586017	5.96015	3.98419	0.000173557	0.00185401	0.632089	8121916	RSPO3	up	84870
2691	0.557687	5.87354	3.98126	0.000175283	0.00186944	0.622937	7948167	APLNR	up	187
2703	-0.592097	4.3477	-3.97762	0.000177453	0.00188458	0.611561	7981992	SNORD116-22	down	100033433
2711	0.595029	6.36126	3.97352	0.00017993	0.00190497	0.598741	8131550	SCIN	up	85477
2721	-0.700666	6.57704	-3.96858	0.000182956	0.00192948	0.583314	8138718	HOXA2	down	3199
2734	0.583824	6.48709	3.96473	0.000185342	0.00194557	0.571336	8124388	H3C2	up	8358
2745	-0.558567	5.8813	-3.95804	0.000189572	0.00198129	0.550472	8108703	PCDHB6	down	56130
2748	-0.521747	7.73233	-3.95715	0.000190139	0.00198471	0.547711	7933772	ANK3	down	288
2768	0.535181	6.67079	3.94848	0.000195771	0.00202939	0.520728	8067955	CXADR	up	1525
2769	-0.546545	5.67454	-3.9484	0.000195826	0.00202939	0.520469	7953284	NTF3	down	4908
2782	0.537451	6.7959	3.94234	0.000199857	0.00206154	0.501636	7924450	DUSP10	up	11221
2795	0.573837	6.27261	3.93774	0.000202975	0.00208337	0.487331	8109507	ITK	up	3702
2798	-0.529852	8.69063	-3.93615	0.000204058	0.00209256	0.482413	8017133	SKA2	down	348235
2817	-0.6872	6.82254	-3.9314	0.000207341	0.00211255	0.467669	8035825	ZNF676	down	163223
2830	0.648356	6.72857	3.92688	0.000210511	0.00213543	0.453647	8152976	TMEM71	up	137835
2859	0.63449	10.002	3.91008	0.000222705	0.00223154	0.401635	7919815	CTSK	up	1513
2860	0.649314	6.64174	3.90993	0.000222819	0.00223202	0.401161	7912145	TNFRSF9	up	3604
2867	0.630635	6.85124	3.9054	0.000226216	0.00226113	0.387189	8166065	TLR8	up	51311
2869	-0.500638	6.76783	-3.90489	0.000226605	0.00226313	0.385602	8105121	GHR	down	2690
2872	0.682159	7.52297	3.90405	0.000227245	0.00226747	0.382998	8129649	SLC18B1	up	116843
2873	0.724669	7.97119	3.90396	0.000227312	0.00226747	0.382727	8014369	CCL3	up	6348
2874	-0.572682	6.83009	-3.9038	0.000227437	0.00226793	0.382219	8095043	RASL11B	down	65997
2880	-0.523505	9.00556	-3.90198	0.000228819	0.00227665	0.376627	8102792	PCDH18	down	54510
2891	0.586451	7.55837	3.89552	0.00023382	0.00231712	0.356663	7921868	FCGR3A	up	2214
2893	-0.592387	6.89026	-3.89439	0.000234705	0.0023245	0.353178	8108729	PCDHB11	down	56125
2901	0.65865	7.50736	3.89207	0.000236528	0.0023363	0.346032	8137240	GIMAP7	up	168537
2915	-0.622647	6.81795	-3.88657	0.000240914	0.00236909	0.329071	7990545	CSPG4	down	1464
2918	0.871077	7.93068	3.88599	0.000241376	0.00237082	0.327305	8143471	CLEC5A	up	23601
2920	0.540968	8.44466	3.88543	0.000241831	0.00237319	0.325567	8059854	ARL4C	up	10123
2925	-0.532099	6.0432	-3.88069	0.00024568	0.00240671	0.31099	8035819	ZNF208	down	7757
2938	0.700003	8.56466	3.87747	0.000248337	0.00242347	0.301062	8104930	SLC1A3	up	6507
2950	0.990078	8.95716	3.86733	0.000256871	0.00249287	0.269886	8140840	STEAP4	up	79689
2953	0.600521	5.02389	3.86649	0.00025759	0.00249766	0.267308	8021245	DCC	up	1630
2970	-0.665562	7.0464	-3.85884	0.000264225	0.00254643	0.243844	8068363	LINC00310	down	114036
2971	-0.630173	8.05871	-3.85868	0.000264364	0.00254703	0.24336	7904761	ITGA10	down	8515
2977	-0.591081	6.02653	-3.85731	0.000265577	0.00255428	0.239137	8023267	MYO5B	down	4645
2995	-0.655664	8.31107	-3.84852	0.000273443	0.00261482	0.212216	8058627	ERBB4	down	2066
2999	0.735472	9.67661	3.8452	0.000276477	0.00263929	0.202038	8055465	CXCR4	up	7852
3017	0.636238	7.78139	3.83233	0.000288527	0.00273862	0.162702	8145989	HTRA4	up	203100
3034	-0.520172	6.28379	-3.82187	0.000298694	0.00281745	0.130779	8098006	GLRB	down	2743
3037	0.62887	6.72494	3.82038	0.000300164	0.00282833	0.126254	8146934	LY96	up	23643
3042	0.592363	5.19902	3.81856	0.000301982	0.00284203	0.120688	7902205	IL12RB2	up	3595
3049	0.550441	7.91081	3.81419	0.000306376	0.00287693	0.107375	7928046	TSPAN15	up	23555
3054	-0.551772	7.07832	-3.8115	0.000309108	0.00289725	0.0991955	8108724	PCDHB10	down	56126
3058	-0.560853	7.55207	-3.80881	0.00031187	0.00292106	0.0909969	8134384	DYNC1I1	down	1780
3064	-0.546061	9.06855	-3.8063	0.000314465	0.00294031	0.0833627	7899627	TINAGL1	down	64129
3069	-0.501251	8.50255	-3.80299	0.000317915	0.0029665	0.0733095	8112202	PLK2	down	10769
3082	0.781602	6.87924	3.79471	0.000326711	0.00303699	0.048168	7966621	SDS	up	10993
3088	0.664009	8.47317	3.79186	0.000329801	0.00305938	0.0394994	8048432	CYP27A1	up	1593
3089	0.675338	7.40478	3.7917	0.000329969	0.00305938	0.039029	8138466	MACC1	up	346389
3092	0.571644	6.86848	3.78982	0.000332018	0.0030743	0.0333289	7951408	CARD16	up	114769
3094	-0.749122	7.98411	-3.78779	0.000334247	0.00309306	0.0271644	8097773	MAB21L2	down	10586
3114	-0.569482	9.38999	-3.78202	0.000340657	0.00313201	0.00967121	8047596	NBEAL1	down	65065
3118	0.747568	7.56784	3.78106	0.00034173	0.00313892	0.0067777	8038899	FPR1	up	2357
3122	0.612662	4.61089	3.77808	0.000345102	0.00316465	-0.00226399	7918794	AMPD1	up	270
3127	0.76246	5.62384	3.7764	0.000347015	0.00317782	-0.00735361	8146660	DNAJC5B	up	85479
3128	-0.50068	5.13949	-3.7763	0.000347122	0.00317793	-0.0076392	8175457	MCF2	down	4168
3133	0.628619	8.76359	3.77457	0.000349101	0.00319044	-0.0128719	7968344	ALOX5AP	up	241
3151	0.762364	6.86764	3.76641	0.000358588	0.00325693	-0.0375558	8129618	VNN1	up	8876
3152	1.58419	9.64373	3.76584	0.000359263	0.00326217	-0.0392851	7951297	MMP12	up	4321
3169	0.52125	8.61228	3.75814	0.000368445	0.00332609	-0.0625146	8097903	TLR2	up	7097
3172	0.696035	10.8309	3.7571	0.000369707	0.00333518	-0.065661	8149448	MSR1	up	4481
3181	-0.780182	6.56254	-3.75063	0.000377632	0.00339655	-0.0851782	8151686	MMP16	down	4325
3186	-0.905055	6.31995	-3.74672	0.000382486	0.00343371	-0.0969293	7935613	HPSE2	down	60495
3188	1.11877	6.73426	3.74541	0.000384133	0.00344616	-0.100881	8145317	ADAMDEC1	up	27299
3247	-0.569812	7.38163	-3.72257	0.000413889	0.0036468	-0.169504	8056323	FIGN	down	55137
3250	-0.71727	7.59066	-3.72215	0.000414462	0.00364879	-0.170775	8105596	RGS7BP	down	401190
3258	0.588195	5.52383	3.7162	0.000422577	0.00370961	-0.188602	8094278	NCAPG	up	64151
3299	-0.583964	5.69817	-3.69865	0.000447416	0.00387958	-0.241099	7934434	MYOZ1	down	58529
3303	0.592837	6.88221	3.69791	0.000448498	0.00388492	-0.243319	8040080	RSAD2	up	91543
3317	0.581555	7.9761	3.69344	0.000455056	0.00392539	-0.256657	8092726	CLDN1	up	9076
3333	0.510719	10.1753	3.6858	0.000466478	0.0040042	-0.279432	8111915	SELENOP	up	6414
3366	0.866242	7.98375	3.66763	0.000494765	0.00419617	-0.3335	7946579	LYVE1	up	10894
3367	0.577796	5.94054	3.66608	0.000497262	0.00421628	-0.338123	8014974	TOP2A	up	7153
3398	0.720528	3.95576	3.65085	0.00052233	0.00438528	-0.38327	7957962	SPIC	up	121599
3404	-1.20105	6.43806	-3.64921	0.000525111	0.00440086	-0.388143	7921690	ITLN1	down	55600
3415	0.735921	6.22805	3.64407	0.000533884	0.00445421	-0.403347	8103769	HPGD	up	3248
3427	-0.544311	8.70873	-3.63825	0.000543996	0.00451819	-0.420562	8152297	ANGPT1	down	284
3431	0.532812	5.96469	3.63528	0.000549218	0.00455588	-0.429327	8064471	SIRPB1	up	10326
3441	0.716777	9.88463	3.62938	0.00055975	0.00463171	-0.446751	8029530	APOE	up	348
3444	0.60084	9.48303	3.62768	0.000562828	0.00465256	-0.451782	8008885	MIR21	up	406991
3498	1.10152	8.55321	3.60048	0.000614163	0.00498897	-0.531809	7908388	RGS1	up	5996
3503	0.741625	10.5266	3.59958	0.000615938	0.00499729	-0.534453	8006433	CCL2	up	6347
3515	0.933277	8.40675	3.59235	0.00063035	0.00509684	-0.555649	8126303	TREM1	up	54210
3519	-0.505892	7.46536	-3.58964	0.000635833	0.0051312	-0.563585	8131631	HDAC9	down	9734
3531	0.52348	6.27455	3.5853	0.000644716	0.00518654	-0.576295	8091715	LXN	up	56925
3543	0.512753	7.42277	3.58012	0.00065547	0.00525476	-0.591449	8045563	ARHGAP15	up	55843
3549	1.28636	9.22608	3.57812	0.000659679	0.00528013	-0.597312	7923547	CHI3L1	up	1116
3552	0.587021	7.30759	3.57692	0.000662196	0.00529645	-0.600799	8101780	HPGDS	up	27306
3566	0.627735	9.13789	3.56752	0.000682345	0.00542115	-0.628248	8103254	SFRP2	up	6423
3578	-0.553023	9.20252	-3.56312	0.000691989	0.00547947	-0.641098	8028872	LTBP4	down	8425
3597	0.526743	5.92147	3.55431	0.000711647	0.0056058	-0.66674	7953835	KLRG1	up	10219
3605	0.512375	5.99171	3.5518	0.000717351	0.00563879	-0.674047	8029136	CD79A	up	973
3616	0.514408	6.71649	3.54759	0.000727009	0.00569984	-0.686287	7903227	PALMD	up	54873
3656	0.598165	8.27226	3.52901	0.000771142	0.0059755	-0.740202	8000184	IGSF6	up	10261
3657	-0.515386	10.009	-3.52849	0.000772408	0.00598113	-0.741702	8133372	ELN	down	2006
3662	0.770791	7.36475	3.52383	0.000783899	0.00605884	-0.755208	8054722	IL1B	up	3553
3669	0.612313	5.60525	3.52176	0.000789045	0.00608731	-0.761191	8099850	TMEM156	up	80008
3676	0.555533	5.95163	3.52012	0.000793156	0.00610206	-0.765943	7953218	RAD51AP1	up	10635
3682	0.723872	12.6962	3.51737	0.000800077	0.00614253	-0.773886	8096301	SPP1	up	6696
3686	0.51382	6.01767	3.51442	0.000807576	0.00619296	-0.782416	8023361	MRO	up	83876
3688	0.801631	5.3153	3.51322	0.000810628	0.00621208	-0.785864	8115445	TIMD4	up	91937
3691	0.545229	7.23979	3.5123	0.000812991	0.00622589	-0.788525	8100393	KDR	up	3791
3715	0.600843	7.96365	3.49966	0.000846083	0.00643197	-0.824991	7957850	GAS2L3	up	283431
3744	-1.4897	6.48455	-3.4889	0.000875234	0.00659607	-0.855939	8106088	CARTPT	down	9607
3760	0.575179	6.12751	3.47956	0.000901323	0.00676084	-0.882768	8129573	MOXD1	up	26002
3761	0.648513	6.446	3.4793	0.000902058	0.00676482	-0.883512	7961083	CLEC2B	up	9976
3772	-0.817817	5.73613	-3.4757	0.000912314	0.00682176	-0.893835	8108995	SCGB3A2	down	117156
3800	0.812769	7.3296	3.46356	0.000947735	0.00703606	-0.928611	7961075	CD69	up	969
3808	0.798731	6.99004	3.45983	0.000958869	0.00709925	-0.939271	8083260	CPA3	up	1359
3814	0.590467	7.63375	3.45911	0.00096104	0.00710632	-0.941335	7934979	ANKRD1	up	27063
3831	0.585484	6.79547	3.4509	0.00098605	0.00725901	-0.96478	7972157	EDNRB	up	1910
3842	-0.53943	7.61192	-3.44677	0.000998841	0.00733158	-0.976539	7985786	ACAN	down	176
3850	-0.519444	6.8016	-3.44231	0.00101287	0.0074122	-0.989261	8143144	PTN	down	5764
3876	0.503381	6.84061	3.43191	0.00104627	0.00760815	-1.01885	7944185	CD3G	up	917
3894	-0.700529	7.47186	-3.42437	0.00107112	0.00774992	-1.04025	7997336	VAT1L	down	57687
3932	0.649365	7.00655	3.40774	0.00112796	0.00808563	-1.08738	8079392	CCR2	up	729230
3979	0.621062	9.61004	3.38466	0.0012116	0.00856711	-1.15253	8162940	ABCA1	up	19
4003	0.94959	7.21732	3.37571	0.00124556	0.00874967	-1.17769	7920244	S100A8	up	6279
4006	-0.741547	5.68644	-3.3747	0.00124945	0.00876959	-1.18053	8101699	PPM1K	down	152926
4085	0.784553	7.59096	3.34766	0.00135797	0.00932485	-1.2563	8104901	IL7R	up	3575
4105	0.56519	4.97906	3.34015	0.00138967	0.00949358	-1.27728	7967322	HCAR3	up	8843
4112	-0.538743	8.25906	-3.33665	0.00140467	0.00957644	-1.28704	8081235	COL8A1	down	1295
4119	-0.795781	6.66569	-3.3334	0.00141875	0.00965266	-1.29611	8099476	PROM1	down	8842
4139	-0.562185	6.40512	-3.32612	0.00145072	0.00982599	-1.31635	7957140	LGR5	down	8549
4148	-0.548446	4.88558	-3.32183	0.0014699	0.00992963	-1.32829	8140650	SEMA3E	down	9723
4157	-0.557123	6.48022	-3.3166	0.0014936	0.0100653	-1.34282	8157027	NIPSNAP3B	down	55335
4170	-0.672234	9.91914	-3.31134	0.00151778	0.0101931	-1.3574	8021081	SLC14A1	down	6563
4173	0.500278	4.98764	3.31063	0.0015211	0.0102051	-1.35939	7953901	CLEC12A	up	160364
4190	0.702521	5.10465	3.30387	0.0015528	0.0103802	-1.37812	8030860	FPR2	up	2358
4196	0.630066	7.5271	3.30219	0.00156076	0.0104208	-1.38276	8091723	RARRES1	up	5918
4219	-0.551148	7.8283	-3.29224	0.00160876	0.0106814	-1.41026	8112971	HAPLN1	down	1404
4257	0.755116	8.73104	3.27267	0.00170733	0.0112169	-1.4642	8044773	MARCO	up	8685
4271	0.595147	7.15253	3.26479	0.00174857	0.0114363	-1.48584	7931914	IL2RA	up	3559
4314	0.643288	8.90466	3.25126	0.00182165	0.01178	-1.52295	7964834	CPM	up	1368
4362	0.551184	8.2349	3.22598	0.00196586	0.0125541	-1.59196	8166059	TLR7	up	51284
4388	0.929533	7.58571	3.21067	0.00205836	0.0130472	-1.63357	8095680	CXCL8	up	3576
4400	0.5119	6.85686	3.20672	0.00208284	0.0131648	-1.64427	8081564	CD96	up	10225
4481	0.500395	6.64433	3.17161	0.00231314	0.0143535	-1.73907	8023757	CD226	up	10666
4482	0.89209	7.44604	3.17139	0.00231467	0.0143603	-1.73967	8160879	CCL19	up	6363
4564	0.714134	9.08759	3.13798	0.00255592	0.0155527	-1.82917	7929816	SCD	up	6319
4596	0.919188	8.23009	3.12303	0.00267127	0.016122	-1.86898	7923562	CHIT1	up	1118
4642	0.536191	5.85662	3.10049	0.00285448	0.0169967	-1.92876	7973110	RNASE2	up	6036
4698	-0.513305	6.73359	-3.07421	0.00308297	0.0181143	-1.99808	8092661	MASP1	down	5648
4778	-0.794904	6.23068	-3.04262	0.00338006	0.0194897	-2.08079	8090690	CPNE4	down	131034
4797	0.52479	9.67604	3.03597	0.00344597	0.0197858	-2.09814	8093053	TFRC	up	7037
4880	0.506349	8.6943	2.99804	0.00384498	0.0216957	-2.19646	7994052	HS3ST2	up	9956
4968	0.578875	6.24972	2.96128	0.0042723	0.0236304	-2.29086	8100994	CXCL2	up	2920
4984	0.591128	10.5625	2.95372	0.0043655	0.024054	-2.31017	7965410	DCN	up	1634
5098	0.745528	6.52241	2.91696	0.00484605	0.0260887	-2.40352	8129637	VNN2	up	8875
5170	0.525004	6.01995	2.89468	0.00516066	0.0273535	-2.45967	8168531	GPR174	up	84636
5302	0.563302	4.69565	2.84151	0.00598918	0.0309085	-2.5923	8146092	IDO1	up	3620
5395	-0.632402	7.55679	-2.80464	0.00663406	0.0335961	-2.68318	8175531	CDR1	down	1038
5587	-0.574513	5.81927	-2.71763	0.00841653	0.0409835	-2.89394	7961595	RERGL	down	79785
5692	-0.559191	9.00291	-2.67833	0.00935734	0.0445884	-2.98743	7961580	LMO3	down	55885
5728	0.698803	8.67971	2.66691	0.00964815	0.0455939	-3.01439	8029536	APOC1	up	341
5811	0.667432	6.77896	2.63709	0.010447	0.0485963	-3.08437	8006459	CCL13	up	6357
5815	0.659259	7.42161	2.63493	0.010507	0.0488339	-3.0894	8105331	GZMK	up	3003
5843	-0.681078	5.75043	-2.62764	0.0107123	0.0495377	-3.1064	7981945	PWAR6	down	100506965

## Sheet: Supplement 3
The DEGs in GSE28829 dataset
	logFC	AveExpr	t	P.Value	adj.P.Val	B	probe_id	symbol	change	ENTREZID
1	-0.914195	5.40118	-9.26658	2.69e-10	4.1e-06	13.3443	206206_at	CD180	down	4064
2	-1.13361	5.69925	-9.22159	3e-10	4.1e-06	13.2439	221081_s_at	DENND2D	down	79961
3	-1.64465	8.33017	-8.34316	2.66e-09	1.14e-05	11.2234	209906_at	C3AR1	down	719
4	-1.86147	7.54625	-8.33451	2.72e-09	1.14e-05	11.2029	202546_at	VAMP8	down	8673
5	-0.509911	7.33616	-7.80914	1.05e-08	2.2e-05	9.93914	215075_s_at	GRB2	down	2885
6	-1.32299	8.69987	-7.79473	1.09e-08	2.2e-05	9.90392	218345_at	TMEM176A	down	55365
7	-1.47827	9.82671	-7.77964	1.13e-08	2.2e-05	9.867	202075_s_at	PLTP	down	5360
8	-1.11393	5.40221	-7.77382	1.15e-08	2.2e-05	9.85277	203507_at	CD68	down	968
9	-0.869694	7.04153	-7.74204	1.25e-08	2.2e-05	9.77488	203236_s_at	LGALS9	down	3965
10	-2.24666	6.67271	-7.71993	1.33e-08	2.2e-05	9.72063	202833_s_at	SERPINA1	down	5265
11	-1.59039	6.66594	-7.7075	1.37e-08	2.2e-05	9.6901	204661_at	CD52	down	1043
12	-1.23199	7.06007	-7.70744	1.37e-08	2.2e-05	9.68995	205988_at	CD84	down	8832
13	-0.69129	5.28901	-7.68387	1.46e-08	2.2e-05	9.63199	206219_s_at	VAV1	down	7409
14	-1.24698	6.70291	-7.65671	1.57e-08	2.2e-05	9.56512	219358_s_at	ADAP2	down	55803
15	-0.883663	6.68877	-7.65499	1.57e-08	2.2e-05	9.56089	218543_s_at	PARP12	down	64761
16	0.879829	7.28486	7.64855	1.6e-08	2.2e-05	9.54501	219902_at	BHMT2	up	23743
17	-0.740979	6.94185	-7.62822	1.69e-08	2.2e-05	9.49486	223402_at	DUSP23	down	54935
18	-0.539144	8.50045	-7.62773	1.69e-08	2.2e-05	9.49365	218231_at	NAGK	down	55577
19	-0.828774	9.29859	-7.60149	1.81e-08	2.2e-05	9.42884	202087_s_at	CTSL	down	1514
20	-0.828692	5.16205	-7.59416	1.85e-08	2.2e-05	9.41071	207091_at	P2RX7	down	5027
21	-1.91642	9.38314	-7.58598	1.89e-08	2.2e-05	9.39048	201422_at	IFI30	down	10437
22	-1.7479	8.99002	-7.57875	1.92e-08	2.2e-05	9.37259	201743_at	CD14	down	929
23	-1.083	4.41159	-7.52902	2.19e-08	2.35e-05	9.24933	229635_at	LINC01094	down	100505702
24	-0.654858	6.16449	-7.52166	2.24e-08	2.35e-05	9.23108	227353_at	TMC8	down	147138
25	-0.643893	9.42465	-7.49199	2.42e-08	2.49e-05	9.15734	201954_at	ARPC1B	down	10095
26	-1.10769	7.74444	-4.96399	2.6e-05	0.00191938	2.55151	219685_at	TMEM35A	down	59353
27	-1.2608	6.78886	-7.44645	2.73e-08	2.71e-05	9.04397	207992_s_at	AMPD3	down	272
28	-0.641625	6.84978	-7.44001	2.78e-08	2.71e-05	9.0279	202329_at	CSK	down	1445
29	-1.96951	8.84577	-7.38847	3.18e-08	2.91e-05	8.89921	202953_at	C1QB	down	713
30	-1.22335	8.66238	-7.33604	3.66e-08	3.15e-05	8.76794	203028_s_at	CYBA	down	1535
31	-1.11583	6.98544	-7.33571	3.66e-08	3.15e-05	8.76711	223303_at	FERMT3	down	83706
32	0.573331	8.87499	7.33261	3.69e-08	3.15e-05	8.75933	212215_at	PREPL	up	9581
33	-0.446948	9.06708	-7.31	3.92e-08	3.25e-05	8.70261	201900_s_at	AKR1A1	stable	10327
34	-0.719988	5.83992	-7.30942	3.93e-08	3.25e-05	8.70114	235085_at	PRAG1	down	157285
35	0.65922	9.11432	7.29216	4.11e-08	3.35e-05	8.65778	209209_s_at	FERMT2	up	10979
36	-1.12241	8.37735	-7.28773	4.16e-08	3.35e-05	8.64665	219243_at	GIMAP4	down	55303
37	-2.07133	7.73571	-7.26956	4.37e-08	3.4e-05	8.60096	1555349_a_at	ITGB2	down	3689
38	1.1638	7.78574	7.25965	4.49e-08	3.4e-05	8.57603	209406_at	BAG2	up	9532
39	-1.98084	6.50985	-7.25564	4.53e-08	3.4e-05	8.56592	205098_at	CCR1	down	1230
40	-1.85649	8.06688	-7.25555	4.54e-08	3.4e-05	8.5657	203240_at	FCGBP	down	8857
41	-0.741936	6.95893	-7.24983	4.61e-08	3.4e-05	8.5513	203402_at	KCNAB2	down	8514
42	-0.668087	6.03549	-7.24058	4.72e-08	3.4e-05	8.528	205504_at	BTK	down	695
43	0.625401	7.31425	7.20665	5.17e-08	3.67e-05	8.44245	212851_at	DCUN1D4	up	23142
44	-2.18772	6.81272	-7.16663	5.76e-08	3.97e-05	8.34132	214511_x_at	FCGR1B	down	2210
45	-0.891956	6.0757	-7.16536	5.78e-08	3.97e-05	8.33811	204923_at	SASH3	down	54440
46	-1.32381	8.3141	-7.15051	6.01e-08	4.06e-05	8.30055	201487_at	CTSC	down	1075
47	-1.32599	6.42219	-7.11965	6.53e-08	4.22e-05	8.22237	204118_at	CD48	down	962
48	-1.50991	8.94071	-7.11772	6.56e-08	4.22e-05	8.21748	218232_at	C1QA	down	712
49	-0.882691	6.12605	-7.07309	7.4e-08	4.5e-05	8.10423	223562_at	PARVG	down	64098
50	-0.730288	5.9894	-7.05198	7.84e-08	4.66e-05	8.05057	204328_at	TMC6	down	11322
51	-0.859892	7.73611	-6.98122	9.49e-08	5.03e-05	7.87032	204588_s_at	SLC7A7	down	9056
52	-1.11125	6.65309	-6.97901	9.54e-08	5.03e-05	7.86468	213733_at	MYO1F	down	4542
53	1.11702	7.37357	6.9778	9.57e-08	5.03e-05	7.86158	224339_s_at	ANGPTL1	up	9068
54	-0.92597	10.5865	-6.9252	1.1e-07	5.6e-05	7.72718	200701_at	NPC2	down	10577
55	-0.8869	6.70835	-6.89395	1.2e-07	5.92e-05	7.64719	206687_s_at	PTPN6	down	5777
56	-1.50903	8.14344	-6.87894	1.25e-07	6.06e-05	7.60871	203932_at	HLA-DMB	down	3109
57	-0.897731	9.41008	-6.87541	1.26e-07	6.06e-05	7.59968	200678_x_at	GRN	down	2896
58	-0.93676	6.71142	-6.8485	1.36e-07	6.24e-05	7.53062	224451_x_at	ARHGAP9	down	64333
59	-0.535468	6.48313	-6.84564	1.37e-07	6.24e-05	7.52327	208071_s_at	LAIR1	down	3903
60	1.46409	7.23376	6.82671	1.44e-07	6.46e-05	7.47467	232298_at	MBNL1-AS1	up	401093
61	-1.15799	5.77858	-6.78993	1.59e-07	6.94e-05	7.38008	219385_at	SLAMF8	down	56833
62	-0.682477	4.92562	-6.7622	1.72e-07	7.4e-05	7.30865	207224_s_at	SIGLEC7	down	27036
63	0.438305	8.50691	6.72887	1.88e-07	7.98e-05	7.22271	203885_at	RAB21	stable	23011
64	0.271653	11.8886	6.71137	1.98e-07	8.31e-05	7.17752	226091_s_at	MRFAP1	stable	93621
65	-1.11358	8.38528	-6.6915	2.09e-07	8.71e-05	7.12621	205020_s_at	ARL4A	down	10124
66	-1.18803	8.34201	-6.68707	2.11e-07	8.74e-05	7.11475	213502_x_at	GUSBP11	down	91316
67	-1.47326	10.8843	-6.66072	2.27e-07	9.09e-05	7.04661	201785_at	RNASE1	down	6035
68	-1.11364	7.81568	-6.65737	2.29e-07	9.09e-05	7.03793	204924_at	TLR2	down	7097
69	-1.27222	10.0162	-6.61751	2.55e-07	0.000100168	6.93467	201847_at	LIPA	down	3988
70	-1.73755	8.37303	-6.61338	2.58e-07	0.000100168	6.92396	204122_at	TYROBP	down	7305
71	-1.7243	8.74026	-6.57109	2.9e-07	0.000107898	6.81421	203416_at	CD53	down	963
72	-1.09405	6.54732	-6.56616	2.94e-07	0.00010863	6.80141	221666_s_at	PYCARD	down	29108
73	-0.974929	6.4128	-6.56278	2.97e-07	0.000108905	6.79264	235359_at	NRROS	down	375387
74	-0.389597	6.90688	-6.5559	3.02e-07	0.000110245	6.77475	203490_at	ELF4	stable	2000
75	-0.85163	6.15916	-6.5404	3.16e-07	0.000113527	6.73446	207697_x_at	LILRB2	down	10288
76	-1.25663	10.9297	-6.52784	3.27e-07	0.000115987	6.7018	200838_at	CTSB	down	1508
77	-1.35688	6.13157	-6.51382	3.4e-07	0.000117697	6.66532	218035_s_at	RBM47	down	54502
78	-1.01764	5.22481	-6.50154	3.51e-07	0.000120013	6.63334	219956_at	GALNT6	down	11226
79	-1.07391	6.97814	-6.47884	3.74e-07	0.000126175	6.57419	204220_at	GMFG	down	9535
80	-0.61528	7.54361	-6.46121	3.92e-07	0.000130044	6.52824	204043_at	TCN2	down	6948
81	-1.90523	8.49515	-6.45414	4e-07	0.000131014	6.5098	203381_s_at	APOE	down	348
82	-2.18392	8.01391	-6.44701	4.08e-07	0.00013282	6.49118	210072_at	CCL19	down	6363
83	-0.727101	8.31582	-6.43702	4.2e-07	0.00013408	6.46512	218831_s_at	FCGRT	down	2217
84	0.301268	7.10638	6.42686	4.31e-07	0.000136349	6.43859	219940_s_at	PCID2	stable	55795
85	1.27866	5.2698	6.41002	4.52e-07	0.000141204	6.39459	205632_s_at	PIP5K1B	up	8395
86	-1.71476	9.26821	-6.39191	4.75e-07	0.000145939	6.34725	201720_s_at	LAPTM5	down	7805
87	-0.452672	4.98452	-6.38534	4.84e-07	0.000147783	6.33006	206991_s_at	CCR5	stable	1234
88	-0.411561	8.14426	-6.38043	4.9e-07	0.000148966	6.31723	226679_at	SLC26A11	stable	284129
89	-0.865603	8.0474	-6.35839	5.21e-07	0.000156548	6.25956	212658_at	LHFPL2	down	10184
90	-1.1076	8.4612	-6.34532	5.4e-07	0.000159427	6.22534	203963_at	CA12	down	771
91	-0.881669	8.63422	-6.3416	5.46e-07	0.000159427	6.2156	204881_s_at	UGCG	down	7357
92	-0.567366	7.49531	-6.29376	6.23e-07	0.000173317	6.09017	210314_x_at	TNFSF13	down	8741
93	-0.557115	6.42809	-6.28941	6.31e-07	0.000173317	6.07877	204981_at	SLC22A18	down	5002
94	-1.11257	6.67578	-6.28207	6.44e-07	0.000174562	6.0595	204103_at	CCL4	down	6351
95	-1.48873	5.60492	-6.27743	6.52e-07	0.000174562	6.04731	204192_at	CD37	down	951
96	-0.506507	7.3183	-6.2657	6.74e-07	0.000177016	6.01653	220731_s_at	NECAP2	down	55707
97	-1.42886	6.53326	-6.26477	6.75e-07	0.000177016	6.01408	208018_s_at	HCK	down	3055
98	-1.15764	5.63013	-6.26248	6.8e-07	0.000177016	6.00807	226219_at	ARHGAP30	down	257106
99	-2.06788	6.76119	-6.26237	6.8e-07	0.000177016	6.00779	204638_at	ACP5	down	54
100	-1.53795	8.59415	-6.24481	7.14e-07	0.000184099	5.96163	217478_s_at	HLA-DMA	down	3108
101	-0.658139	5.23016	-6.23001	7.44e-07	0.000188258	5.92275	203379_at	RPS6KA1	down	6195
102	-1.61733	6.69258	-6.22355	7.57e-07	0.000190247	5.90575	205859_at	LY86	down	9450
103	0.675067	10.8793	6.2229	7.59e-07	0.000190247	5.90405	209283_at	CRYAB	up	1410
104	0.480744	9.79182	6.22112	7.62e-07	0.000190317	5.89937	203303_at	DYNLT3	stable	6990
105	-0.654528	5.87028	-6.18736	8.37e-07	0.000199023	5.81053	1559502_s_at	LRRC25	down	126364
106	-0.432504	7.19172	-6.18239	8.49e-07	0.000200051	5.79744	222143_s_at	MTMR14	stable	64419
107	-0.940352	6.14097	-6.17999	8.55e-07	0.000200522	5.79113	209879_at	SELPLG	down	6404
108	-1.09463	6.33485	-6.1698	8.79e-07	0.0002042	5.7643	209083_at	CORO1A	down	11151
109	-0.483252	6.68701	-6.13913	9.57e-07	0.000218089	5.68347	205965_at	BATF	stable	10538
110	0.439959	12.0228	6.1322	9.76e-07	0.000219814	5.6652	212509_s_at	MXRA7	stable	439921
111	-1.9126	5.91798	-6.11834	1.01e-06	0.000227289	5.62863	221210_s_at	NPL	down	80896
112	-1.83271	8.86074	-6.11148	1.03e-06	0.000230725	5.61053	225353_s_at	C1QC	down	714
113	0.37381	8.778	6.1002	1.07e-06	0.000235203	5.58076	212131_at	LSM14A	stable	26065
114	0.871466	8.9194	6.09765	1.07e-06	0.000235248	5.57404	200790_at	ODC1	up	4953
115	-2.60677	8.68019	-6.09496	1.08e-06	0.000235248	5.56692	209924_at	CCL18	down	6362
116	-0.647045	12.0943	-6.08979	1.1e-06	0.000237336	5.55328	217733_s_at	TMSB10	down	9168
117	-1.26991	6.87896	-6.08421	1.12e-06	0.000240104	5.53854	212543_at	CRYBG1	down	202
118	0.830175	9.10288	6.07119	1.16e-06	0.000246061	5.50417	224352_s_at	CFL2	up	1073
119	0.86506	5.15292	6.06832	1.17e-06	0.000246867	5.49658	208456_s_at	RRAS2	up	22800
120	-0.895011	10.066	-6.05437	1.21e-06	0.000251671	5.45973	200736_s_at	GPX1	down	2876
121	-0.924511	10.1	-6.05346	1.22e-06	0.000251671	5.45731	201508_at	IGFBP4	down	3487
122	0.451624	7.64953	6.04011	1.26e-06	0.000257263	5.42202	226541_at	FBXO30	stable	84085
123	0.355861	8.14839	6.03884	1.27e-06	0.000257263	5.41868	218386_x_at	USP16	stable	10600
124	0.508519	5.56409	6.03492	1.28e-06	0.000258538	5.40831	219616_at	ACSS3	up	79611
125	-0.847087	5.3127	-6.03441	1.28e-06	0.000258538	5.40696	203922_s_at	CYBB	down	1536
126	0.495287	8.24959	6.01651	1.35e-06	0.000268803	5.3596	209362_at	MED21	stable	9412
127	-0.972149	4.53704	-6.00616	1.39e-06	0.000274667	5.33223	206545_at	CD28	down	940
128	-0.933453	6.67106	-5.98481	1.47e-06	0.000289439	5.2757	203508_at	TNFRSF1B	down	7133
129	0.421165	8.38433	5.9822	1.48e-06	0.000289775	5.2688	209139_s_at	PRKRA	stable	8575
130	-1.70041	8.0872	-5.95631	1.59e-06	0.000304646	5.20022	202345_s_at	FABP5	down	2171
131	-0.587365	6.08569	-5.9473	1.63e-06	0.000308103	5.17634	203047_at	STK10	down	6793
132	0.8217	6.73179	5.94328	1.65e-06	0.000309449	5.16569	226018_at	MTURN	up	222166
133	0.674949	8.52378	5.93494	1.69e-06	0.000314595	5.14357	203881_s_at	DMD	up	1756
134	-0.556127	7.32331	-5.92817	1.72e-06	0.000318435	5.12563	218072_at	COMMD9	down	29099
135	-1.00196	7.66584	-5.92373	1.75e-06	0.000321333	5.11383	205542_at	STEAP1	down	26872
136	-1.26899	6.92657	-5.91076	1.81e-06	0.000328766	5.07945	203139_at	DAPK1	down	1612
137	-0.973396	7.29858	-5.90688	1.83e-06	0.00033013	5.06914	229860_x_at	C4orf48	down	401115
138	-0.931193	4.6668	-5.90573	1.84e-06	0.00033013	5.06611	209626_s_at	OSBPL3	down	26031
139	-0.660448	5.22288	-5.90209	1.85e-06	0.000331218	5.05643	205349_at	GNA15	down	2769
140	0.681123	9.16389	5.89459	1.89e-06	0.000335073	5.03653	219093_at	PID1	up	55022
141	-0.617423	7.56825	-5.88881	1.92e-06	0.000338344	5.0212	201853_s_at	CDC25B	down	994
142	-0.451401	6.99855	-5.88387	1.95e-06	0.00034115	5.00808	203286_at	RNF44	stable	22838
143	-0.887572	10.7857	-5.88356	1.95e-06	0.00034115	5.00728	201201_at	CSTB	down	1476
144	-1.11441	6.7423	-5.88089	1.97e-06	0.000342619	5.00018	204057_at	IRF8	down	3394
145	-0.803136	7.03925	-5.87585	2e-06	0.000346383	4.98679	205656_at	PCDH17	down	27253
146	-1.04983	4.1619	-5.87136	2.02e-06	0.000348906	4.97488	206420_at	IGSF6	down	10261
147	-1.90499	8.99165	-5.86314	2.07e-06	0.000355535	4.95306	201631_s_at	IER3	down	8870
148	-1.54462	7.51477	-5.858	2.1e-06	0.000359562	4.93939	208146_s_at	CPVL	down	54504
149	-0.421602	6.03394	-5.85569	2.11e-06	0.000360759	4.93327	220918_at	RUNX1-IT1	stable	80215
150	-0.651062	5.5081	-5.83449	2.24e-06	0.000380449	4.87694	227055_at	METTL7B	down	196410
151	-0.723735	6.31806	-5.83105	2.26e-06	0.000382935	4.86781	1552315_at	GIMAP1	down	170575
152	-0.565472	7.15464	-5.82735	2.29e-06	0.000385735	4.85797	222817_at	HSD3B7	down	80270
153	-1.06369	11.8861	-5.80247	2.45e-06	0.000404836	4.79183	203649_s_at	PLA2G2A	down	5320
154	-0.861842	5.80494	-5.7991	2.47e-06	0.000406358	4.78286	211434_s_at	CCRL2	down	9034
155	-1.48791	9.12263	-5.79898	2.47e-06	0.000406358	4.78255	204787_at	VSIG4	down	11326
156	-0.66718	5.3578	-5.79433	2.51e-06	0.000409229	4.77019	210058_at	MAPK13	down	5603
157	-2.06158	6.83545	-5.79326	2.51e-06	0.000409244	4.76732	210889_s_at	FCGR2B	down	2213
158	-1.22147	7.26277	-5.77853	2.62e-06	0.000420325	4.72814	205819_at	MARCO	down	8685
159	0.626103	6.43383	5.77699	2.63e-06	0.000420818	4.72406	205231_s_at	EPM2A	up	7957
160	-0.509413	8.62577	-5.76703	2.71e-06	0.000430217	4.69757	202120_x_at	AP2S1	down	1175
161	-0.868538	4.29306	-5.75168	2.83e-06	0.000445268	4.65669	1554240_a_at	ITGAL	down	3683
162	-0.655741	7.31592	-5.7498	2.84e-06	0.000446337	4.65169	204265_s_at	GPSM3	down	63940
163	-1.12329	6.71772	-5.74644	2.87e-06	0.000448126	4.64275	210992_x_at	FCGR2C	down	9103
164	-0.763934	6.78883	-5.74366	2.89e-06	0.00044892	4.63536	201489_at	PPIF	down	10105
165	-1.45431	10.576	-5.73699	2.94e-06	0.000453535	4.61761	208894_at	HLA-DRA	down	3122
166	-0.643686	6.86359	-5.73253	2.98e-06	0.000456676	4.60572	226111_s_at	ZNF385A	down	25946
167	-0.680263	5.37859	-5.73127	2.99e-06	0.000457018	4.60236	219471_at	RUBCNL	down	80183
168	0.505008	7.95691	5.7154	3.13e-06	0.000472553	4.56009	225798_at	JAZF1	up	221895
169	-0.845068	7.70824	-5.71224	3.16e-06	0.000474143	4.55167	202023_at	EFNA1	down	1942
170	-1.60301	6.16841	-5.70962	3.18e-06	0.000476328	4.54471	232024_at	GIMAP2	down	26157
171	-1.05952	9.17475	-5.70331	3.24e-06	0.000483518	4.52789	201212_at	LGMN	down	5641
172	0.484454	6.87361	5.69656	3.3e-06	0.000488762	4.5099	219038_at	MORC4	stable	79710
173	-0.549332	6.66669	-5.66558	3.6e-06	0.00051775	4.42734	203123_s_at	SLC11A2	down	4891
174	-2.25411	6.95178	-5.6549	3.71e-06	0.000526591	4.39887	209395_at	CHI3L1	down	1116
175	-0.739954	5.91064	-5.65162	3.74e-06	0.00053009	4.39012	204629_at	PARVB	down	29780
176	-0.900888	6.57573	-5.65	3.76e-06	0.000531136	4.38579	209734_at	NCKAP1L	down	3071
177	0.262556	10.5307	5.64592	3.8e-06	0.000535869	4.37492	200693_at	YWHAQ	stable	10971
178	-0.425391	7.7514	-5.64437	3.82e-06	0.00053683	4.37078	203233_at	IL4R	stable	3566
179	-1.29057	8.17592	-5.63609	3.91e-06	0.00054526	4.3487	208885_at	LCP1	down	3936
180	-1.0699	6.50719	-5.63026	3.97e-06	0.000550053	4.33315	204440_at	CD83	down	9308
181	0.873324	7.09707	5.61441	4.15e-06	0.000569759	4.29087	226360_at	ZNRF3	up	84133
182	-1.13767	6.27753	-5.61261	4.18e-06	0.000570809	4.28606	219519_s_at	SIGLEC1	down	6614
183	-0.761076	7.04909	-5.61042	4.2e-06	0.000572903	4.28021	219593_at	SLC15A3	down	51296
184	-0.730432	7.74972	-5.59981	4.33e-06	0.000585855	4.25192	209166_s_at	MAN2B1	down	4125
185	-0.578675	6.96674	-5.5697	4.71e-06	0.000626767	4.17154	217755_at	JPT1	down	51155
186	-0.870096	6.10794	-5.56809	4.73e-06	0.00062809	4.16724	207540_s_at	SYK	down	6850
187	-0.955662	7.46494	-5.56647	4.75e-06	0.000629394	4.16291	227923_at	SHANK3	down	85358
188	0.586567	6.7438	5.56272	4.8e-06	0.000629991	4.15292	209198_s_at	SYT11	up	23208
189	0.922454	4.80117	5.55934	4.85e-06	0.0006339	4.14389	200930_s_at	VCL	up	7414
190	-0.381188	6.89044	-5.55781	4.87e-06	0.0006339	4.13979	204046_at	PLCB2	stable	5330
191	-0.487546	7.95572	-5.55714	4.88e-06	0.0006339	4.13801	202239_at	PARP4	stable	143
192	-0.421847	4.16871	-5.5495	4.99e-06	0.000644589	4.11761	207354_at	CCL16	stable	6360
193	-0.779225	5.9863	-5.52321	5.37e-06	0.000677768	4.04738	228094_at	JAML	down	120425
194	-0.698932	5.25436	-5.52252	5.38e-06	0.000677768	4.04556	203472_s_at	SLCO2B1	down	11309
195	-1.64862	6.35899	-5.52094	5.4e-06	0.000677768	4.04132	205159_at	CSF2RB	down	1439
196	-0.906429	8.00284	-5.52081	5.41e-06	0.000677768	4.04099	203523_at	LSP1	down	4046
197	-1.79986	7.40375	-5.51964	5.42e-06	0.000677768	4.03785	1555728_a_at	MS4A4A	down	51338
198	-0.582023	6.11609	-5.4954	5.81e-06	0.000715049	3.97309	201564_s_at	FSCN1	down	6624
199	0.889558	6.19797	5.49463	5.82e-06	0.000715049	3.97102	220595_at	PDZRN4	up	29951
200	0.380698	7.8666	5.49085	5.88e-06	0.000718815	3.96093	225326_at	RBM27	stable	54439
201	-1.42935	8.35598	-5.47237	6.2e-06	0.000747526	3.91153	220532_s_at	TMEM176B	down	28959
202	-0.649425	11.3674	-5.46352	6.35e-06	0.000755855	3.88789	214022_s_at	IFITM1	down	8519
203	0.383154	8.80599	5.46339	6.35e-06	0.000755855	3.88754	202919_at	MOB4	stable	25843
204	-1.18813	4.6276	-5.45947	6.43e-06	0.000762045	3.87707	206214_at	PLA2G7	down	7941
205	-1.17234	6.33403	-5.4551	6.5e-06	0.000768164	3.86537	209696_at	FBP1	down	2203
206	0.53235	6.46737	5.4474	6.65e-06	0.000783308	3.84479	213386_at	PGAP4	up	84302
207	-1.43246	7.77161	-5.43212	6.94e-06	0.000805548	3.80394	219666_at	MS4A6A	down	64231
208	0.394987	9.08013	5.43139	6.95e-06	0.000805548	3.80199	204688_at	SGCE	stable	8910
209	-0.938778	7.7204	-5.42463	7.09e-06	0.000815849	3.78391	204829_s_at	FOLR2	down	2350
210	-0.992445	4.76725	-5.41609	7.26e-06	0.000830459	3.76109	226804_at	FAM20A	down	54757
211	-0.682942	4.77728	-5.41189	7.35e-06	0.000835123	3.74984	205801_s_at	RASGRP3	down	25780
212	-0.816261	7.99179	-5.40957	7.4e-06	0.000836916	3.74364	213923_at	RAP2B	down	5912
213	0.968934	6.73287	5.40892	7.41e-06	0.000836916	3.7419	219377_at	GAREM1	up	64762
214	0.512323	7.72645	5.40281	7.54e-06	0.000846199	3.72556	202069_s_at	IDH3A	up	3419
215	-0.892783	6.35307	-5.39997	7.6e-06	0.000848424	3.71797	204116_at	IL2RG	down	3561
216	-0.480378	8.1642	-5.39441	7.72e-06	0.000854548	3.70311	208987_s_at	KDM2A	stable	22992
217	0.461213	9.31955	5.39378	7.73e-06	0.000854548	3.7014	204036_at	LPAR1	stable	1902
218	0.345176	6.69836	5.38021	8.03e-06	0.00087665	3.66511	203446_s_at	OCRL	stable	4952
219	0.563628	6.59095	5.3792	8.06e-06	0.000877374	3.66243	218795_at	ACP6	up	51205
220	1.11722	7.75981	5.37551	8.14e-06	0.000880591	3.65254	204979_s_at	SH3BGR	up	6450
221	-1.26752	9.35198	-5.37455	8.16e-06	0.000880591	3.64998	1558034_s_at	CP	down	1356
222	-1.28194	7.07449	-5.37369	8.18e-06	0.000880591	3.64768	209933_s_at	CD300A	down	11314
223	-0.416889	8.58202	-5.37122	8.24e-06	0.000884989	3.64108	201642_at	IFNGR2	stable	3460
224	-0.724398	7.1808	-5.36881	8.3e-06	0.000889296	3.63461	226243_at	PTRHD1	down	391356
225	-0.42877	6.29986	-5.36593	8.36e-06	0.000894783	3.62692	202545_at	PRKCD	stable	5580
226	0.594707	7.64919	5.35862	8.54e-06	0.000909856	3.60735	203661_s_at	TMOD1	up	7111
227	0.709741	6.81996	5.35535	8.62e-06	0.000916491	3.59861	219343_at	CDC37L1	up	55664
228	1.02489	5.59216	5.35113	8.72e-06	0.000923864	3.58732	207453_s_at	DNAJB5	up	25822
229	-0.885976	7.76023	-5.34825	8.79e-06	0.000929571	3.57963	218627_at	DRAM1	down	55332
230	-0.462205	4.72421	-5.34591	8.85e-06	0.000933924	3.57337	1553706_at	HTRA4	stable	203100
231	-0.333376	7.76911	-5.33374	9.16e-06	0.00095911	3.54081	204034_at	ETHE1	stable	23474
232	-0.697805	4.88758	-5.32933	9.27e-06	0.00096925	3.52901	219159_s_at	SLAMF7	down	57823
233	1.00505	6.23455	4.37703	0.000134978	0.00574761	0.991714	203104_at	CSF1R	up	1436
234	0.545883	7.88903	5.31065	9.77e-06	0.00100817	3.47903	202780_at	OXCT1	up	5019
235	-0.895929	7.25937	-5.30796	9.85e-06	0.00101216	3.47182	202637_s_at	ICAM1	down	3383
236	-0.808102	7.50257	-5.30792	9.85e-06	0.00101216	3.4717	205479_s_at	PLAU	down	5328
237	-0.468044	6.02991	-5.30458	9.94e-06	0.00101981	3.46278	231780_at	GBGT1	stable	26301
238	-0.384051	10.1954	-5.30311	9.98e-06	0.0010202	3.45885	201779_s_at	RNF13	stable	11342
239	0.374336	7.55087	5.30152	1e-05	0.00102289	3.45458	202055_at	KPNA1	stable	3836
240	0.382199	9.3182	5.29408	1.02e-05	0.00103435	3.43467	201092_at	RBBP7	stable	5931
241	-1.92772	8.34618	-5.29362	1.03e-05	0.00103435	3.43345	217148_x_at	IGLV2-14	down	28815
242	-1.35667	8.36701	-5.28646	1.05e-05	0.00104896	3.41428	204174_at	ALOX5AP	down	241
243	-0.69397	7.11409	-5.28594	1.05e-05	0.00104896	3.4129	207104_x_at	LILRB1	down	10859
244	-1.91609	7.81804	-5.2845	1.05e-05	0.00104896	3.40905	215946_x_at	IGLL3P	down	91353
245	-1.28371	4.69242	-5.28409	1.05e-05	0.00104896	3.40796	225502_at	DOCK8	down	81704
246	-1.05071	7.75521	-5.27293	1.09e-05	0.0010708	3.37808	218736_s_at	PALMD	down	54873
247	0.541324	6.93364	5.26881	1.1e-05	0.00108138	3.36704	213342_at	YAP1	up	10413
248	-1.77762	4.78562	-5.26671	1.11e-05	0.00108196	3.36143	206134_at	ADAMDEC1	down	27299
249	0.431081	4.41445	5.25866	1.13e-05	0.00109471	3.33989	1552299_at	AK9	stable	221264
250	-0.57032	6.51095	-5.25814	1.13e-05	0.00109471	3.33849	212873_at	ARHGAP45	down	23526
251	-0.435721	6.30049	-5.25699	1.14e-05	0.00109632	3.33543	206074_s_at	HMGA1	stable	3159
252	0.630206	4.18567	5.25061	1.16e-05	0.00111426	3.31835	206698_at	XK	up	7504
253	0.616958	10.8651	5.2477	1.17e-05	0.00111755	3.31055	201116_s_at	CPE	up	1363
254	0.76363	8.08871	5.24558	1.17e-05	0.00112229	3.30488	218820_at	C14orf132	up	56967
255	-0.403807	8.57629	-5.24344	1.18e-05	0.00112433	3.29917	201649_at	UBE2L6	stable	9246
256	1.31967	7.08941	5.2428	1.18e-05	0.00112433	3.29744	206068_s_at	ACADL	up	33
257	-0.483486	6.91341	-5.23168	1.22e-05	0.00114499	3.26768	224674_at	TTYH3	stable	80727
258	-0.659341	9.31093	-5.22905	1.23e-05	0.00114776	3.26063	202838_at	FUCA1	down	2517
259	-0.859911	6.65265	-5.22475	1.25e-05	0.00115779	3.24915	213524_s_at	G0S2	down	50486
260	-0.44879	6.56601	-5.21758	1.27e-05	0.00117423	3.22995	206868_at	STARD8	stable	9754
261	0.372693	7.01712	5.21577	1.28e-05	0.00117423	3.2251	221904_at	FAM131A	stable	131408
262	-1.53309	5.93974	-5.21098	1.29e-05	0.00118551	3.21228	209949_at	NCF2	down	4688
263	-1.78043	8.18218	-5.20509	1.32e-05	0.00119521	3.19652	209201_x_at	CXCR4	down	7852
264	-1.53953	5.37688	-5.20507	1.32e-05	0.00119521	3.19646	219890_at	CLEC5A	down	23601
265	-0.700063	6.24725	-5.20348	1.32e-05	0.00119521	3.1922	223657_at	FAM167B	down	84734
266	-1.53099	7.47834	-5.20278	1.32e-05	0.00119521	3.19035	206584_at	LY96	down	23643
267	0.475641	8.23934	5.18962	1.37e-05	0.00122949	3.15512	224850_at	ATAD1	stable	84896
268	0.286271	9.97497	5.18945	1.38e-05	0.00122949	3.15465	201133_s_at	PJA2	stable	9867
269	-0.72734	4.16401	-5.18764	1.38e-05	0.00123312	3.14982	214467_at	GPR65	down	8477
270	0.706127	5.90568	5.18327	1.4e-05	0.00124235	3.13811	227506_at	SLC16A9	up	220963
271	-0.441074	5.75095	-5.18072	1.41e-05	0.00124726	3.13129	208189_s_at	MYO7A	stable	4647
272	0.371166	7.66698	5.17501	1.43e-05	0.00126435	3.11602	201099_at	USP9X	stable	8239
273	0.530017	8.84802	5.16433	1.48e-05	0.00129789	3.08742	227029_at	FAM177A1	up	283635
274	0.515297	6.26741	5.1631	1.48e-05	0.00130029	3.08414	207839_s_at	TMEM8B	up	51754
275	-0.397272	6.93406	-5.16131	1.49e-05	0.00130269	3.07935	204169_at	IMPDH1	stable	3614
276	-0.427756	6.93943	-5.16025	1.49e-05	0.00130452	3.0765	228593_at	MTMR9LP	stable	339483
277	-1.13655	8.96026	-5.15904	1.5e-05	0.00130689	3.07326	218559_s_at	MAFB	down	9935
278	-1.84188	7.18	-5.15022	1.54e-05	0.00133555	3.04966	223501_at	TNFSF13B	down	10673
279	-1.84911	7.89151	-5.14523	1.56e-05	0.00135017	3.03632	204416_x_at	APOC1	down	341
280	-0.416571	10.5668	-5.1398	1.58e-05	0.00136454	3.02177	200975_at	PPT1	stable	5538
281	-0.581572	9.99213	-5.13789	1.59e-05	0.00136792	3.01667	212188_at	KCTD12	down	115207
282	-0.899104	7.29314	-5.13677	1.6e-05	0.00136792	3.01367	216250_s_at	LPXN	down	9404
283	-1.29315	8.72102	-5.13611	1.6e-05	0.00136792	3.0119	221019_s_at	COLEC12	down	81035
284	0.738847	7.4575	5.13558	1.6e-05	0.00136792	3.01048	219929_s_at	ZFYVE21	up	79038
285	-0.43377	7.47003	-5.13487	1.6e-05	0.00136853	3.00858	221002_s_at	TSPAN14	stable	81619
286	-0.393904	4.59929	-5.12684	1.64e-05	0.00139556	2.98709	220162_s_at	CARD9	stable	64170
287	0.661228	7.36777	5.12005	1.67e-05	0.00142028	2.96894	204832_s_at	BMPR1A	up	657
288	0.560337	4.51351	5.11407	1.7e-05	0.00143912	2.95291	207326_at	BTC	up	685
289	-0.483721	7.39461	-5.1123	1.71e-05	0.00144273	2.94818	203964_at	NMI	stable	9111
290	-0.435851	12.8628	-5.11027	1.72e-05	0.0014481	2.94275	201666_at	TIMP1	stable	7076
291	0.507218	5.25175	5.10171	1.76e-05	0.00147389	2.91985	225130_at	ZRANB1	up	54764
292	-0.464838	8.07107	-5.0975	1.78e-05	0.00148814	2.90859	200078_s_at	ATP6V0B	stable	533
293	-0.310207	6.57301	-5.09651	1.79e-05	0.00149005	2.90592	219125_s_at	SLC50A1	stable	55974
294	-0.396624	4.03814	-5.09371	1.8e-05	0.00149731	2.89843	1552553_a_at	NLRC4	stable	58484
295	-1.18437	10.0422	-5.09259	1.81e-05	0.00149816	2.89545	201137_s_at	HLA-DPB1	down	3115
296	-0.787632	8.1696	-5.09243	1.81e-05	0.00149816	2.89501	224739_at	PIM3	down	415116
297	-1.46091	7.53522	-5.09047	1.82e-05	0.00149971	2.88978	201850_at	CAPG	down	822
298	-0.8257	8.40927	-5.09045	1.82e-05	0.00149971	2.88972	200766_at	CTSD	down	1509
299	0.682832	7.33462	5.08378	1.85e-05	0.00151903	2.87188	222918_at	RAB9B	up	51209
300	-0.51569	8.45814	-5.07863	1.88e-05	0.00153665	2.8581	203857_s_at	PDIA5	down	10954
301	-0.621826	7.65352	-5.07365	1.91e-05	0.00155142	2.84478	203615_x_at	SULT1A1	down	6817
302	-0.600063	8.56488	-5.07284	1.91e-05	0.00155265	2.84262	224724_at	SULF2	down	55959
303	0.557607	8.06088	5.06573	1.95e-05	0.00157942	2.82359	225889_at	AEBP2	up	121536
304	-0.501377	4.31953	-5.06512	1.95e-05	0.00157982	2.82194	204825_at	MELK	down	9833
305	-0.56579	6.33829	-5.06167	1.97e-05	0.00159288	2.81273	202659_at	PSMB10	down	5699
306	-2.68809	6.41283	-5.06104	1.98e-05	0.00159336	2.81105	212592_at	JCHAIN	down	3512
307	-0.72367	6.22699	-5.05975	1.98e-05	0.00159684	2.80757	205147_x_at	NCF4	down	4689
308	0.725134	6.48412	5.05648	2e-05	0.00160687	2.79885	205934_at	PLCL1	up	5334
309	0.99324	6.8483	5.04971	2.04e-05	0.00163213	2.78072	203861_s_at	ACTN2	up	88
310	-0.598166	4.30202	-5.04909	2.04e-05	0.00163213	2.77907	202705_at	CCNB2	down	9133
311	-1.12402	8.07226	-5.04699	2.06e-05	0.00163758	2.77346	202957_at	HCLS1	down	3059
312	-0.403215	10.7107	-5.04666	2.06e-05	0.00163758	2.77257	200660_at	S100A11	stable	6282
313	-1.3535	4.76479	-5.04446	2.07e-05	0.00164228	2.76669	223484_at	C15orf48	down	84419
314	1.2984	6.93588	5.0441	2.07e-05	0.00164228	2.76572	205421_at	SLC22A3	up	6581
315	0.73077	6.06669	5.03792	2.11e-05	0.00166393	2.74918	206374_at	DUSP8	up	1850
316	-0.486263	8.90751	-5.03173	2.15e-05	0.00168109	2.73263	209124_at	MYD88	stable	4615
317	-0.69781	7.56299	-5.02592	2.18e-05	0.00170156	2.71708	214430_at	GLA	down	2717
318	-0.315608	10.398	-5.02208	2.21e-05	0.0017055	2.70683	200086_s_at	COX4I1	stable	1327
319	0.589864	4.77528	5.02207	2.21e-05	0.0017055	2.70681	1554415_at	TAF5L	up	27097
320	-0.493729	7.91739	-5.01987	2.22e-05	0.00171372	2.70091	1557370_s_at	MYCBP2	stable	23077
321	0.859222	7.43288	5.01058	2.28e-05	0.001748	2.67605	200884_at	CKB	up	1152
322	-0.73743	8.07214	-5.01035	2.28e-05	0.001748	2.67545	209365_s_at	ECM1	down	1893
323	0.43127	7.45613	5.00879	2.29e-05	0.00175323	2.67129	218364_at	LRRFIP2	stable	9209
324	0.444633	6.76141	5.00589	2.31e-05	0.00176025	2.66352	219156_at	SYNJ2BP	stable	55333
325	-0.384376	3.65498	-5.004	2.32e-05	0.00176717	2.65848	203755_at	BUB1B	stable	701
326	-0.499896	6.78827	-5.00186	2.33e-05	0.00177295	2.65274	205090_s_at	NAGPA	stable	51172
327	-1.00901	6.65421	-5.00128	2.34e-05	0.00177337	2.6512	204912_at	IL10RA	down	3587
328	0.556	6.31083	4.9918	2.4e-05	0.00180887	2.62585	202514_at	DLG1	up	1739
329	0.611973	9.62658	4.99028	2.41e-05	0.00181364	2.62178	203688_at	PKD2	up	5311
330	-1.22492	5.3478	-4.98905	2.42e-05	0.00181548	2.61848	205997_at	ADAM28	down	10863
331	-1.31922	6.96028	-4.97853	2.49e-05	0.00185988	2.59038	226818_at	MPEG1	down	219972
332	0.294872	6.78307	4.97464	2.52e-05	0.00187786	2.57996	226945_at	RHBDD1	stable	84236
333	-1.14864	11.3552	-4.97306	2.53e-05	0.00188367	2.57574	211990_at	HLA-DPA1	down	3113
334	0.513126	4.77059	4.96619	2.58e-05	0.0019127	2.55738	216350_s_at	ZNF10	up	7556
335	0.292127	7.98342	4.96462	2.59e-05	0.00191857	2.55319	225074_at	RAB2B	stable	84932
336	1.33393	5.50075	7.46469	2.6e-08	2.63e-05	9.0894	210845_s_at	PLAUR	up	5329
337	1.07328	4.86119	4.95433	2.67e-05	0.00195654	2.52567	232054_at	PCDH20	up	64881
338	0.883516	6.33982	4.95207	2.69e-05	0.0019664	2.51963	226413_at	LINC00938	up	400027
339	-0.344202	7.11094	-4.94672	2.73e-05	0.00197773	2.50534	226738_at	WDR81	stable	124997
340	-0.463038	4.69837	-4.94364	2.75e-05	0.00198033	2.49711	1554285_at	HAVCR2	stable	84868
341	-1.76047	7.55902	-4.94005	2.78e-05	0.00199409	2.48752	1554899_s_at	FCER1G	down	2207
342	-0.404657	7.84189	-4.93578	2.81e-05	0.00201131	2.47609	203979_at	CYP27A1	stable	1593
343	0.496545	7.23808	4.93561	2.81e-05	0.00201131	2.47565	225216_at	FAM199X	stable	139231
344	0.371683	6.74799	4.92635	2.89e-05	0.00205375	2.4509	226805_at	FITM2	stable	128486
345	-0.598613	6.39794	-4.9249	2.9e-05	0.00205897	2.44703	229296_at	LINC01503	down	100506119
346	0.330645	4.88479	4.92416	2.91e-05	0.00205897	2.44504	1320_at	PTPN21	stable	11099
347	-0.848915	7.4806	-4.92361	2.91e-05	0.00205897	2.44358	202877_s_at	CD93	down	22918
348	0.406489	7.09571	4.92308	2.92e-05	0.00205931	2.44217	214436_at	FBXL2	stable	25827
349	-0.984239	7.58078	-4.92263	2.92e-05	0.00205931	2.44097	210042_s_at	CTSZ	down	1522
350	0.565698	6.33713	4.91142	3.01e-05	0.00211083	2.41101	206498_at	OCA2	up	4948
351	-0.433519	4.66175	-4.9103	3.02e-05	0.00211305	2.40803	227002_at	FAM78A	stable	286336
352	-0.38766	8.47534	-4.90606	3.06e-05	0.0021235	2.39669	203454_s_at	ATOX1	stable	475
353	-0.764321	7.09362	-4.9049	3.07e-05	0.00212644	2.39359	203547_at	CD4	down	920
354	-0.439307	5.15495	-4.90445	3.07e-05	0.00212645	2.39238	205192_at	MAP3K14	stable	9020
355	0.465322	7.98431	4.8978	3.13e-05	0.00214305	2.37463	203120_at	TP53BP2	stable	7159
356	0.373006	7.1565	4.89772	3.13e-05	0.00214305	2.37441	223340_at	ATL1	stable	51062
357	0.859096	6.60387	4.89721	3.14e-05	0.0021431	2.37306	1556325_at	FILIP1	up	27145
358	-0.586633	5.15885	-4.89549	3.15e-05	0.00215087	2.36845	235709_at	GAS2L3	down	283431
359	2.00732	6.88084	4.893	3.17e-05	0.00216056	2.36182	1563933_a_at	PLD5	up	200150
360	-0.735867	9.64358	-4.89076	3.19e-05	0.00216616	2.35584	218109_s_at	MFSD1	down	64747
361	-0.557176	6.11585	-4.88999	3.2e-05	0.00216819	2.35377	231835_at	PRXL2B	down	127281
362	0.356152	7.8536	4.88893	3.21e-05	0.00217053	2.35094	218310_at	RABGEF1	stable	27342
363	-0.673294	10.3954	-4.88615	3.24e-05	0.00217993	2.34353	201506_at	TGFBI	down	7045
364	1.44372	7.28822	4.88375	3.26e-05	0.00218499	2.3371	203295_s_at	ATP1A2	up	477
365	0.469786	8.71719	4.8828	3.27e-05	0.00218558	2.33458	212510_at	GPD1L	stable	23171
366	0.604031	6.38397	4.88238	3.27e-05	0.00218558	2.33345	227434_at	GALNT17	up	64409
367	-0.702867	11.4791	-4.88235	3.27e-05	0.00218558	2.33337	201502_s_at	NFKBIA	down	4792
368	-0.341272	6.85686	-4.8734	3.35e-05	0.00222416	2.30948	226728_at	SLC27A1	stable	376497
369	-0.711467	5.62023	-4.87099	3.38e-05	0.0022346	2.30304	1558290_a_at	PVT1	down	5820
370	0.411494	7.96707	4.87016	3.38e-05	0.0022346	2.30083	212690_at	DDHD2	stable	23259
371	-0.522565	4.92025	-4.85722	3.51e-05	0.00230417	2.26627	223655_at	CD163L1	down	283316
372	0.46954	6.87443	4.85695	3.51e-05	0.00230417	2.26555	202786_at	STK39	stable	27347
373	0.496796	6.05932	4.85409	3.54e-05	0.0023185	2.25791	226443_at	PABIR1	stable	116224
374	0.699059	11.3301	4.85348	3.55e-05	0.0023197	2.25629	203088_at	FBLN5	up	10516
375	-0.499061	5.86966	-4.85285	3.55e-05	0.00232101	2.25462	222173_s_at	TBC1D2	stable	55357
376	-0.620414	8.11749	-4.85079	3.57e-05	0.00232897	2.24911	204436_at	PLEKHO2	down	80301
377	-1.20938	5.5717	-4.83474	3.74e-05	0.0024101	2.20628	218404_at	SNX10	down	29887
378	-0.727948	7.38155	-4.83313	3.76e-05	0.00241321	2.20199	202357_s_at	CFB	down	629
379	0.535255	7.91238	4.8326	3.76e-05	0.00241397	2.20057	212441_at	KIAA0232	up	9778
380	0.469539	7.52496	4.83101	3.78e-05	0.00241631	2.19632	204344_s_at	SEC23A	stable	10484
381	0.663777	6.22648	4.8268	3.82e-05	0.00242944	2.1851	1555543_a_at	CLCC1	up	23155
382	-0.48204	6.57316	-4.82619	3.83e-05	0.00242944	2.18346	209665_at	CYB561D2	stable	11068
383	0.469075	8.0686	4.82468	3.85e-05	0.00243696	2.17944	206874_s_at	SLK	stable	9748
384	-0.75346	8.59033	-4.82232	3.87e-05	0.00244469	2.17314	219622_at	RAB20	down	55647
385	-0.361582	8.3016	-4.8159	3.94e-05	0.00248073	2.156	202180_s_at	MVP	stable	9961
386	-1.20546	6.77297	-4.81285	3.98e-05	0.00249438	2.14787	218858_at	DEPTOR	down	64798
387	0.300017	4.52855	4.81237	3.98e-05	0.00249438	2.14658	1561942_x_at	ERVK13-1	stable	100507321
388	-1.44123	6.89298	-4.81191	3.99e-05	0.00249438	2.14537	204774_at	EVI2A	down	2123
389	0.375608	4.50298	4.81069	4e-05	0.00249999	2.14211	1553603_s_at	ATL2	stable	64225
390	-0.370398	5.9376	-4.80828	4.03e-05	0.00250843	2.13568	205467_at	CASP10	stable	843
391	-0.813846	6.11166	-4.80682	4.04e-05	0.0025105	2.13178	210166_at	TLR5	down	7100
392	-0.550075	7.03497	-4.80601	4.05e-05	0.0025105	2.12962	225929_s_at	RNF213	down	57674
393	-0.802955	4.59316	-4.80598	4.05e-05	0.0025105	2.12956	1555758_a_at	CDKN3	down	1033
394	-0.411324	7.27171	-4.80555	4.06e-05	0.00251074	2.12839	209546_s_at	APOL1	stable	8542
395	-0.436649	8.41535	-4.79852	4.14e-05	0.00255798	2.10966	209579_s_at	MBD4	stable	8930
396	0.620187	8.03008	4.79731	4.15e-05	0.00256383	2.10642	218823_s_at	KCTD9	up	54793
397	-1.41208	6.63	-4.79554	4.18e-05	0.00257081	2.10171	219434_at	TREM1	down	54210
398	-0.425226	5.52935	-4.79198	4.22e-05	0.00259381	2.09221	206617_s_at	RENBP	stable	5973
399	-0.635032	6.53765	-4.79074	4.23e-05	0.00259991	2.08892	225671_at	SPNS2	down	124976
400	-0.574012	5.54594	-4.78962	4.25e-05	0.00260053	2.08591	204039_at	CEBPA	down	1050
401	0.505312	7.72846	4.78666	4.28e-05	0.00261647	2.07802	209015_s_at	DNAJB6	up	10049
402	-1.31591	5.33221	-4.78578	4.29e-05	0.00261886	2.07567	202901_x_at	CTSS	down	1520
403	-0.448079	9.95799	-4.78356	4.32e-05	0.00262369	2.06976	201527_at	ATP6V1F	stable	9296
404	-0.498128	6.21791	-4.78354	4.32e-05	0.00262369	2.06971	226474_at	NLRC5	stable	84166
405	0.782407	7.04534	4.77222	4.46e-05	0.00268178	2.03953	226925_at	PXYLP1	up	92370
406	0.288701	8.45731	4.76637	4.53e-05	0.00272026	2.02395	203909_at	SLC9A6	stable	10479
407	-0.518339	5.42589	-4.7631	4.57e-05	0.00273943	2.01523	229686_at	P2RY8	down	286530
408	-0.751438	7.24881	-4.76205	4.59e-05	0.00274449	2.01244	218211_s_at	MLPH	down	79083
409	0.457115	4.41848	4.76092	4.6e-05	0.00275029	2.00941	231131_at	FAM133A	stable	286499
410	-0.682414	10.4968	-4.75941	4.62e-05	0.00275897	2.00539	201438_at	COL6A3	down	1293
411	-0.247756	13.4368	-4.75425	4.69e-05	0.00279013	1.99165	212788_x_at	FTL	stable	2512
412	0.790755	7.4243	4.74227	4.85e-05	0.00286706	1.95972	218706_s_at	GRAMD2B	up	65983
413	0.302306	9.81434	4.74109	4.87e-05	0.00286874	1.95659	200711_s_at	SKP1	stable	6500
414	-0.331547	7.60232	-4.73987	4.88e-05	0.002874	1.95335	218248_at	FAM111A	stable	63901
415	-1.40267	7.47981	-4.73918	4.89e-05	0.00287655	1.95149	223454_at	CXCL16	down	58191
416	0.800141	4.07654	4.73559	4.94e-05	0.0028995	1.94193	1556194_a_at	HSPA4L	up	22824
417	-0.480016	5.49067	-4.73431	4.96e-05	0.002905	1.93854	1555486_a_at	PRR5L	stable	79899
418	0.4806	8.56854	4.73415	4.96e-05	0.002905	1.9381	217988_at	CCNB1IP1	stable	57820
419	-0.520903	8.95627	-4.72784	5.05e-05	0.0029446	1.9213	201272_at	AKR1B1	down	231
420	0.383262	7.32344	4.72364	5.11e-05	0.0029667	1.91012	225968_at	PRICKLE2	stable	166336
421	-0.562226	7.09063	-4.72308	5.12e-05	0.00296823	1.90863	1552256_a_at	SCARB1	down	949
422	0.472369	11.8577	4.72145	5.14e-05	0.00297873	1.90428	202336_s_at	PAM	stable	5066
423	-0.692216	8.79746	-4.71975	5.17e-05	0.00298806	1.89975	201050_at	PLD3	down	23646
424	-1.05523	5.44933	-4.71958	5.17e-05	0.00298806	1.89931	1555852_at	PSMB8-AS1	down	100507463
425	-0.827684	7.41941	-4.71604	5.22e-05	0.00300115	1.88987	219117_s_at	FKBP11	down	51303
426	-0.819939	7.11538	-4.71381	5.25e-05	0.00301202	1.88393	201578_at	PODXL	down	5420
427	-0.755435	4.68655	-4.713	5.27e-05	0.00301202	1.88179	210176_at	TLR1	down	7096
428	0.935701	5.02108	4.71195	5.28e-05	0.00301543	1.87898	221104_s_at	NIPSNAP3B	up	55335
429	-0.397448	3.90371	-4.71186	5.28e-05	0.00301543	1.87874	1554508_at	PIK3AP1	stable	118788
430	-0.715879	7.35641	-4.7087	5.33e-05	0.00303452	1.87033	203510_at	MET	down	4233
431	-0.749626	7.88429	-4.70862	5.33e-05	0.00303452	1.87014	203470_s_at	PLEK	down	5341
432	-0.575956	4.56184	-4.70792	5.34e-05	0.00303631	1.86826	203213_at	CDK1	down	983
433	-0.519666	6.51102	-4.70753	5.35e-05	0.00303648	1.86722	202894_at	EPHB4	down	2050
434	-1.55801	6.9105	-4.70165	5.44e-05	0.00308029	1.85158	213566_at	RNASE6	down	6039
435	-1.20315	6.98064	-4.70133	5.44e-05	0.00308029	1.85072	228071_at	GIMAP7	down	168537
436	0.418573	10.1647	4.70054	5.45e-05	0.00308104	1.84863	217795_s_at	TMEM43	stable	79188
437	0.421896	6.63209	4.69899	5.48e-05	0.003091	1.84449	214553_s_at	ARPP19	stable	10776
438	0.446926	8.33524	4.69624	5.52e-05	0.00310539	1.83717	212673_at	METAP1	stable	23173
439	-0.526596	4.29736	-4.69338	5.57e-05	0.00311756	1.82958	220066_at	NOD2	down	64127
440	-0.590176	6.99168	-4.6918	5.59e-05	0.00312823	1.82537	209575_at	IL10RB	down	3588
441	0.631168	5.17285	4.68986	5.62e-05	0.00313788	1.82019	1554579_a_at	MYO18B	up	84700
442	-0.72576	6.20346	-4.68962	5.62e-05	0.00313788	1.81955	221664_s_at	F11R	down	50848
443	0.747386	5.97753	4.68906	5.63e-05	0.00313846	1.81806	228233_at	FREM1	up	158326
444	0.875795	7.11665	4.68508	5.7e-05	0.0031573	1.80748	220955_x_at	RAB23	up	51715
445	0.490895	4.21556	4.68358	5.72e-05	0.00316571	1.80349	206264_at	GPLD1	stable	2822
446	-0.428952	6.0504	-4.68042	5.77e-05	0.00318752	1.79508	204425_at	ARHGAP4	stable	393
447	0.363011	7.351	4.67594	5.84e-05	0.00322133	1.78318	221522_at	ANKRD27	stable	84079
448	-0.510256	7.52958	-4.67393	5.88e-05	0.00322664	1.77781	204088_at	P2RX4	down	5025
449	-0.597124	7.75799	-4.67328	5.89e-05	0.00322926	1.77609	209050_s_at	RALGDS	down	5900
450	0.398724	7.40042	4.6677	5.98e-05	0.00327211	1.76125	212791_at	C1orf216	stable	127703
451	0.249298	3.52271	4.66678	6e-05	0.00327563	1.7588	224195_at	TTTY12	stable	83867
452	-0.334409	7.26696	-4.65986	6.11e-05	0.00332333	1.7404	207122_x_at	SULT1A2	stable	6799
453	-0.535808	7.32392	-4.6577	6.15e-05	0.00334024	1.73466	204336_s_at	RGS19	down	10287
454	-1.01989	4.51744	-4.65656	6.17e-05	0.00334634	1.73162	205269_at	LCP2	down	3937
455	-0.407281	7.40469	-4.65634	6.18e-05	0.00334634	1.73105	234974_at	GALM	stable	130589
456	-1.03068	6.8131	-4.65332	6.23e-05	0.00337153	1.72302	226676_at	ZNF521	down	25925
457	-0.51845	9.17268	-4.65261	6.24e-05	0.00337487	1.72114	200661_at	CTSA	down	5476
458	0.686972	6.53229	4.65211	6.25e-05	0.00337627	1.71981	204485_s_at	TOM1L1	up	10040
459	-0.330156	7.12668	-4.64565	6.36e-05	0.00342453	1.70265	224578_at	RCC2	stable	55920
460	-0.460671	7.83792	-4.64497	6.38e-05	0.0034277	1.70084	218999_at	TMEM140	stable	55281
461	0.548857	10.7141	4.64445	6.39e-05	0.00342937	1.69945	1553678_a_at	ITGB1	up	3688
462	0.396638	7.50433	4.63647	6.53e-05	0.00348652	1.67824	202915_s_at	FAM20B	stable	9917
463	0.483468	8.01664	4.63367	6.58e-05	0.00350373	1.67081	201124_at	ITGB5	stable	3693
464	1.01252	6.71218	4.63274	6.6e-05	0.00350951	1.66833	219882_at	TTLL7	up	79739
465	-0.394677	9.61868	-4.62532	6.74e-05	0.00356946	1.64862	201923_at	PRDX4	stable	10549
466	-0.346657	4.00653	-4.62455	6.75e-05	0.00357265	1.64657	218662_s_at	NCAPG	stable	64151
467	-0.59557	6.0059	-4.62093	6.82e-05	0.00359369	1.63697	228770_at	GPR146	down	115330
468	0.338258	8.07069	4.61827	6.87e-05	0.00361219	1.62988	218373_at	AKTIP	stable	64400
469	-0.601455	9.76034	-4.61473	6.94e-05	0.00362793	1.6205	202428_x_at	DBI	down	1622
470	-1.35583	7.90137	-4.61265	6.98e-05	0.0036353	1.61497	201739_at	SGK1	down	6446
471	0.337254	9.75265	4.61166	7e-05	0.00364197	1.61233	201176_s_at	ARCN1	stable	372
472	0.859075	7.48848	4.61016	7.03e-05	0.00365377	1.60837	202613_at	CTPS1	up	1503
473	-0.67988	5.87964	-4.60585	7.12e-05	0.00368777	1.59691	204689_at	HHEX	down	3087
474	-0.639	7.67146	-4.60535	7.13e-05	0.00368942	1.59559	230800_at	ADCY4	down	196883
475	-0.292802	9.48381	-4.59666	7.3e-05	0.00377335	1.57252	200803_s_at	TMBIM6	stable	7009
476	-0.35891	6.63315	-4.59509	7.33e-05	0.00378639	1.56836	220189_s_at	MGAT4B	stable	11282
477	-0.950502	8.25997	-4.59165	7.4e-05	0.0038123	1.55923	203666_at	CXCL12	down	6387
478	-0.517116	6.09477	-4.58615	7.52e-05	0.00386068	1.54463	1557116_at	APOL6	down	80830
479	1.06803	6.91585	4.58112	7.63e-05	0.00390817	1.53129	203304_at	BAMBI	up	25805
480	0.966697	9.68569	4.57952	7.66e-05	0.00391713	1.52704	1552309_a_at	NEXN	up	91624
481	-0.413162	7.48728	-4.57922	7.67e-05	0.00391713	1.52623	218189_s_at	NANS	stable	54187
482	-0.893931	7.2192	-4.57908	7.67e-05	0.00391713	1.52587	203760_s_at	SLA	down	6503
483	-0.456084	4.55657	-4.57883	7.68e-05	0.00391713	1.52521	223767_at	GPR84	stable	53831
484	-1.26956	4.76127	-4.57464	7.77e-05	0.00395389	1.5141	202503_s_at	PCLAF	down	9768
485	-0.365933	3.40123	-4.57045	7.86e-05	0.0039858	1.50298	219918_s_at	ASPM	stable	259266
486	0.440887	7.55029	4.56756	7.92e-05	0.00400401	1.49531	209537_at	EXTL2	stable	2135
487	-0.406079	7.44984	-4.56428	8e-05	0.00403044	1.48661	210589_s_at	GBAP1	stable	2630
488	-0.550866	6.5491	-4.56235	8.04e-05	0.00404724	1.48151	226531_at	ORAI1	down	84876
489	-1.46335	6.50734	-4.55231	8.27e-05	0.00413234	1.45489	219777_at	GIMAP6	down	474344
490	0.306536	9.36193	4.55045	8.31e-05	0.00413962	1.44995	202432_at	PPP3CB	stable	5532
491	-0.674377	9.69927	-4.55038	8.31e-05	0.00413962	1.44977	206332_s_at	IFI16	down	3428
492	-0.361738	9.8896	-4.54969	8.33e-05	0.00414384	1.44795	208374_s_at	CAPZA1	stable	829
493	-0.525982	7.41082	-4.54692	8.39e-05	0.004161	1.4406	224701_at	PARP14	down	54625
494	0.397778	5.92553	4.544	8.46e-05	0.0041725	1.43286	211325_x_at	DSTNP2	stable	171220
495	0.878891	5.97613	4.54316	8.48e-05	0.00417855	1.43064	205534_at	PCDH7	up	5099
496	0.549109	10.4498	4.53872	8.59e-05	0.00421185	1.41888	204992_s_at	PFN2	up	5217
497	-0.434869	9.92713	-4.53734	8.62e-05	0.00421439	1.41522	203753_at	TCF4	stable	6925
498	-0.566259	6.56333	-4.53722	8.63e-05	0.00421439	1.41489	205936_s_at	HK3	down	3101
499	-0.902528	7.3002	-4.53659	8.64e-05	0.00421439	1.41324	204137_at	GPR137B	down	7107
500	-1.02809	6.13768	-4.5343	8.7e-05	0.00422643	1.40717	212311_at	SEL1L3	down	23231
501	-0.887187	4.12684	-4.53389	8.71e-05	0.00422754	1.40608	204170_s_at	CKS2	down	1164
502	-0.595664	6.35262	-4.53184	8.76e-05	0.00424427	1.40066	203920_at	NR1H3	down	10062
503	0.335286	7.68538	4.52846	8.84e-05	0.00427711	1.3917	227748_at	RBMXL1	stable	494115
504	0.622125	8.9367	4.52514	8.92e-05	0.00430762	1.38291	227758_at	RERG	up	85004
505	0.760189	9.57667	4.52466	8.93e-05	0.00430762	1.38164	221667_s_at	HSPB8	up	26353
506	-1.71172	8.09963	-4.52308	8.97e-05	0.00432292	1.37745	223343_at	MS4A7	down	58475
507	-0.919569	7.824	-4.52033	9.04e-05	0.00434109	1.37016	224779_s_at	CIAO2A	down	84191
508	-0.669314	5.68073	-4.51844	9.09e-05	0.00434878	1.36517	208130_s_at	TBXAS1	down	6916
509	-0.304645	4.2913	-4.51588	9.16e-05	0.00437456	1.35839	220111_s_at	ANO2	stable	57101
510	-1.20387	6.34117	-4.51389	9.21e-05	0.00439303	1.35312	1558397_at	PECAM1	down	5175
511	-0.557016	5.7526	-4.51137	9.27e-05	0.00441262	1.34644	204458_at	PLA2G15	down	23659
512	0.483106	6.06594	4.51088	9.29e-05	0.00441272	1.34515	203368_at	CRELD1	stable	78987
513	0.415693	8.53292	4.50781	9.37e-05	0.00444516	1.33703	201660_at	ACSL3	stable	2181
514	-0.547025	5.83764	-4.50634	9.4e-05	0.00445958	1.33315	204445_s_at	ALOX5	down	240
515	-0.446065	8.82682	-4.5034	9.48e-05	0.00448869	1.32536	202425_x_at	PPP3CA	stable	5530
516	-0.457663	7.13573	-4.50163	9.53e-05	0.00450713	1.32066	225214_at	LOC100129034	stable	100129034
517	0.337793	6.76642	4.49957	9.58e-05	0.00452921	1.31522	208832_at	ATXN10	stable	25814
518	-0.413398	5.84776	-4.49913	9.6e-05	0.00453094	1.31405	214054_at	DOK2	stable	9046
519	-0.748476	8.62924	-4.49827	9.62e-05	0.00453557	1.31179	213629_x_at	MT1F	down	4494
520	0.630436	6.68138	4.49753	9.64e-05	0.00453722	1.30982	232570_s_at	ADAM33	up	80332
521	-0.845418	7.0272	-4.4974	9.64e-05	0.00453722	1.30948	203828_s_at	IL32	down	9235
522	0.480085	6.60217	4.49542	9.7e-05	0.00454129	1.30425	225623_at	CIPC	stable	85457
523	-0.782976	5.92377	-4.49523	9.7e-05	0.00454129	1.30373	219256_s_at	SH3TC1	down	54436
524	0.577493	7.7812	4.49522	9.7e-05	0.00454129	1.30371	224720_at	MIB1	up	57534
525	0.421511	6.64963	4.49463	9.72e-05	0.00454129	1.30215	219081_at	ANKHD1	stable	54882
526	-0.65585	8.59227	-4.4875	9.91e-05	0.00461725	1.28328	213125_at	OLFML2B	down	25903
527	-0.567082	11.0963	-4.48724	9.92e-05	0.00461725	1.2826	217801_at	ATP5F1E	down	514
528	-1.25847	7.6271	-4.48521	9.98e-05	0.00463869	1.27725	202643_s_at	TNFAIP3	down	7128
529	-0.428327	8.21904	-4.48396	0.000100123	0.0046478	1.27394	224413_s_at	TM2D2	stable	83877
530	-0.893585	4.50993	-4.48258	0.00010051	0.00465712	1.27029	205306_x_at	KMO	down	8564
531	0.827825	5.8187	4.4803	0.000101155	0.00468302	1.26425	1557223_at	RBPMS	up	11030
532	-0.434085	5.29023	-4.47118	0.000103768	0.00478931	1.24014	205937_at	CGREF1	stable	10669
533	-0.415577	6.00691	-4.47106	0.000103801	0.00478931	1.23984	202787_s_at	MAPKAPK3	stable	7867
534	0.27099	3.11374	4.47048	0.00010397	0.00479307	1.2383	1562301_at	C8orf34	stable	116328
535	-0.780931	6.62565	-4.47001	0.000104108	0.00479536	1.23705	225763_at	RCSD1	down	92241
536	-0.556238	7.94208	-4.46857	0.000104529	0.00481073	1.23323	202181_at	SUSD6	down	9766
537	-0.446176	6.64796	-4.46256	0.000106301	0.00487627	1.21735	201613_s_at	AP1G2	stable	8906
538	-1.10058	6.32099	-4.46252	0.00010631	0.00487627	1.21726	214435_x_at	RALA	down	5898
539	0.31543	8.15245	4.46189	0.000106499	0.00488083	1.21559	223236_at	NSRP1	stable	84081
540	1.016	11.4997	4.46103	0.000106755	0.00488847	1.21332	1555725_a_at	RGS5	up	8490
541	-0.528369	5.50236	-4.45928	0.00010728	0.00490775	1.20868	227799_at	MYO1G	down	64005
542	-0.951612	6.14927	-4.45877	0.000107432	0.00490775	1.20735	201668_x_at	MARCKS	down	4082
543	-0.385749	4.60436	-4.45696	0.000107977	0.0049181	1.20256	203046_s_at	TIMELESS	stable	8914
544	-0.643621	7.14129	-4.45678	0.000108032	0.0049181	1.20208	204639_at	ADA	down	100
545	-1.55095	6.84306	-4.45479	0.000108634	0.0049373	1.19683	234103_at	KCNT2	down	343450
546	0.494623	5.78974	4.45177	0.000109556	0.00497094	1.18884	203997_at	PTPN3	stable	5774
547	-1.02978	7.11062	-4.44493	0.000111668	0.00503652	1.1708	225355_at	NEURL1B	down	54492
548	0.743002	9.38506	4.44425	0.000111881	0.00503652	1.169	212730_at	SYNM	up	23336
549	-0.637293	5.19604	-4.42873	0.00011684	0.00521063	1.12802	207419_s_at	RAC2	down	5880
550	0.449283	6.67295	4.42679	0.000117474	0.00522754	1.12291	228583_at	LIN52	stable	91750
551	-0.515248	7.72502	-4.42474	0.000118147	0.00524753	1.11751	202145_at	LY6E	down	4061
552	-0.310135	7.71645	-4.4191	0.000120025	0.00530506	1.10261	218243_at	RUFY1	stable	80230
553	-0.482913	9.71772	-4.41777	0.00012047	0.00531491	1.09911	204806_x_at	HLA-F	stable	3134
554	1.01184	6.94918	4.41552	0.00012123	0.00532475	1.09317	210875_s_at	ZEB1	up	6935
555	-0.288741	7.80151	-4.41503	0.000121395	0.00532687	1.09189	218403_at	TRIAP1	stable	51499
556	0.355141	7.38472	4.41374	0.000121834	0.00533758	1.08848	203105_s_at	DNM1L	stable	10059
557	-0.676166	6.94041	-4.41101	0.000122768	0.00536988	1.08126	204858_s_at	TYMP	down	1890
558	-0.552483	6.82497	-4.40879	0.00012353	0.00539456	1.07542	203554_x_at	PTTG1	down	9232
559	-0.812037	8.11124	-4.4082	0.000123733	0.00539913	1.07387	203058_s_at	PAPSS2	down	9060
560	0.413147	7.37419	4.40403	0.000125181	0.00543706	1.06288	218496_at	RNASEH1	stable	246243
561	-0.573655	5.9194	-4.40398	0.000125199	0.00543706	1.06274	226448_at	FAM89A	down	375061
562	-0.616425	6.8628	-4.4001	0.000126563	0.00547101	1.05251	208997_s_at	UCP2	down	7351
563	-0.958207	5.13582	-4.40005	0.000126581	0.00547101	1.05237	215925_s_at	CD72	down	971
564	0.215046	3.56989	4.39921	0.000126877	0.00547512	1.05017	1560407_at	MARK1	stable	4139
565	0.44696	9.43598	4.39805	0.00012729	0.00548865	1.0471	217761_at	ADI1	stable	55256
566	-0.47374	7.37326	-4.39709	0.000127631	0.00549898	1.04458	223591_at	RNF135	stable	84282
567	-0.399884	9.72027	-4.39431	0.000128624	0.00553308	1.03725	202727_s_at	IFNGR1	stable	3459
568	0.713893	4.82971	4.39331	0.000128983	0.00554415	1.03462	1553194_at	NEGR1	up	257194
569	-0.900005	4.14893	-4.39049	0.000130003	0.00557485	1.02718	206715_at	TFEC	down	22797
570	-0.99914	7.1386	-4.38863	0.00013068	0.0055951	1.02227	202687_s_at	TNFSF10	down	8743
571	0.404104	8.22885	4.38739	0.000131133	0.00560571	1.01901	212508_at	MOAP1	stable	64112
572	-0.334938	5.71093	-4.38576	0.000131728	0.00562674	1.01473	205209_at	ACVR1B	stable	91
573	-1.02302	9.77048	-4.37706	0.000134966	0.00574761	0.991796	208335_s_at	ACKR1	down	2532
574	-1.19448	7.57263	-5.31302	9.71e-06	0.00100526	3.48535	232099_at	PCDHB16	down	57717
575	0.757061	5.83762	4.37436	0.000135984	0.00577696	0.984701	204753_s_at	HLF	up	3131
576	0.442228	4.7352	4.37049	0.000137461	0.00583064	0.974501	226809_at	FAR2P2	stable	100216479
577	-1.03405	7.78898	-4.36696	0.00013882	0.0058746	0.965215	218729_at	LXN	down	56925
578	1.87817	6.36804	4.36626	0.00013909	0.00588148	0.963378	213906_at	MYBL1	up	4603
579	0.847539	7.8742	4.36341	0.000140202	0.00591475	0.955864	212325_at	LIMCH1	up	22998
580	-1.16711	6.02887	-4.36259	0.000140521	0.00592029	0.953719	209869_at	ADRA2A	down	150
581	1.09983	6.56446	4.35869	0.00014206	0.00595183	0.943431	205478_at	PPP1R1A	up	5502
582	-0.433351	5.70603	-4.35605	0.000143106	0.00598484	0.936503	205831_at	CD2	stable	914
583	-0.441928	7.24845	-4.35588	0.000143176	0.00598484	0.936041	218597_s_at	CISD1	stable	55847
584	-0.707029	4.89418	-4.35358	0.000144095	0.00600509	0.930004	227210_at	SFMBT2	down	57713
585	-0.447658	8.53675	-4.35357	0.0001441	0.00600509	0.929969	203175_at	RHOG	stable	391
586	-0.540983	7.76185	-4.35052	0.000145329	0.00603791	0.92195	202974_at	MPP1	down	4354
587	0.858436	7.65753	4.34802	0.000146346	0.00607248	0.915373	229084_at	CNTN4	up	152330
588	0.339731	7.81382	4.34688	0.000146813	0.00607248	0.912361	200813_s_at	PAFAH1B1	stable	5048
589	-0.421231	3.63932	-4.34657	0.000146939	0.00607248	0.911555	218542_at	CEP55	stable	55165
590	-0.356113	6.58815	-4.34536	0.000147435	0.00608376	0.908375	220358_at	BATF3	stable	55509
591	-0.315237	8.15625	-4.345	0.000147583	0.00608528	0.907427	217792_at	SNX5	stable	27131
592	-1.12187	5.75841	-4.34078	0.000149327	0.00614332	0.896334	1556314_a_at	ZNF366	down	167465
593	-0.344051	5.97861	-4.33995	0.000149674	0.00615297	0.894142	1552846_s_at	RAB42	stable	115273
594	-0.577634	4.35255	-4.32493	0.000156066	0.00637261	0.854672	1554519_at	CD80	down	941
595	0.618527	9.30046	4.32411	0.000156425	0.00638248	0.852507	212742_at	RNF115	up	27246
596	0.466644	5.61942	4.32335	0.000156755	0.00639119	0.850516	226370_at	KLHL15	stable	80311
597	-0.499709	5.7335	-4.32206	0.000157318	0.00640937	0.847131	205285_s_at	FYB1	stable	2533
598	-0.38843	7.90443	-4.31633	0.000159849	0.0064911	0.832069	208012_x_at	SP110	stable	3431
599	-0.446262	10.1102	-4.31379	0.000160984	0.00652952	0.825396	201944_at	HEXB	stable	3074
600	0.5577	11.6148	4.31221	0.000161692	0.00655337	0.821255	200621_at	CSRP1	up	1465
601	-0.298402	8.05196	-4.31188	0.000161841	0.00655455	0.820385	213729_at	PRPF40A	stable	55660
602	0.568726	8.09649	4.31031	0.000162547	0.00656518	0.816278	218686_s_at	RHBDF1	up	64285
603	0.632097	6.45423	4.31026	0.000162573	0.00656518	0.816127	212701_at	TLN2	up	83660
604	-1.06706	6.08814	-4.30969	0.000162827	0.00656518	0.814652	1405_i_at	CCL5	down	6352
605	0.586341	5.79912	4.30936	0.000162979	0.00656518	0.813772	224798_s_at	FAM219B	up	57184
606	-0.386521	6.6359	-4.30853	0.000163356	0.00656518	0.81159	209354_at	TNFRSF14	stable	8764
607	-0.585393	7.53631	-4.30818	0.000163514	0.00656518	0.810681	227791_at	SLC9A9	down	285195
608	-0.858498	5.73386	-4.30812	0.000163544	0.00656518	0.810507	204527_at	MYO5A	down	4644
609	-0.869692	6.61552	-4.30444	0.000165224	0.00660352	0.800864	202855_s_at	SLC16A3	down	9123
610	1.12593	6.55626	4.30327	0.000165765	0.00662032	0.797777	219140_s_at	RBP4	up	5950
611	0.407096	8.04536	4.30023	0.000167171	0.00664481	0.789809	202983_at	HLTF	stable	6596
612	0.450286	7.7945	4.29855	0.000167955	0.00666696	0.785395	212970_at	APBB2	stable	323
613	0.330234	5.55055	4.29839	0.00016803	0.00666696	0.784972	1554509_a_at	MINDY3	stable	80013
614	0.41018	7.43461	4.2976	0.0001684	0.00667193	0.7829	225574_at	RWDD4	stable	201965
615	-0.374482	4.49358	-4.28845	0.000172741	0.00679958	0.758887	206483_at	DNAAF11	stable	23639
616	1.0114	6.91254	4.2872	0.000173343	0.00681345	0.755608	225016_at	APCDD1	up	147495
617	-0.587978	8.22576	-4.28278	0.000175486	0.00688284	0.744017	201641_at	BST2	down	684
618	-0.457075	5.14333	-4.27936	0.000177159	0.00692858	0.735066	202954_at	UBE2C	stable	11065
619	-0.420486	5.94153	-4.27593	0.000178856	0.006975	0.726074	204385_at	KYNU	stable	8942
620	-0.45318	10.4463	-4.27466	0.000179489	0.00699423	0.722741	202948_at	IL1R1	stable	3554
621	0.689543	12.3977	4.26862	0.000182527	0.007102	0.706912	204083_s_at	TPM2	up	7169
622	-1.00106	7.7767	-4.26841	0.000182632	0.007102	0.706366	218454_at	PLBD1	down	79887
623	-0.479155	7.11441	-4.2663	0.000183706	0.00713362	0.700836	221188_s_at	CIDEB	stable	27141
624	0.522958	6.57891	4.26553	0.000184102	0.00713496	0.698808	224836_at	TP53INP2	up	58476
625	-0.661361	5.12323	-4.26528	0.000184229	0.00713496	0.698155	205685_at	CD86	down	942
626	0.504456	4.0616	4.26511	0.000184315	0.00713496	0.697714	1556190_s_at	LOC100507516	up	100507516
627	0.951367	8.83061	4.26362	0.00018508	0.00715648	0.693808	222108_at	AMIGO2	up	347902
628	1.05697	4.39597	4.2629	0.000185454	0.00715703	0.691908	228737_at	TOX2	up	84969
629	-0.411118	11.676	-4.26232	0.000185749	0.00715703	0.690407	212067_s_at	C1R	stable	715
630	-0.453613	7.45715	-4.25935	0.000187288	0.00721126	0.682624	220980_s_at	ADPGK	stable	83440
631	-0.278564	8.72585	-4.25817	0.000187903	0.00722983	0.679535	226146_at	HEIH	stable	100859930
632	0.440263	12.3865	4.25426	0.000189957	0.00729348	0.66928	201021_s_at	DSTN	stable	11034
633	-0.890396	7.21578	-4.25342	0.000190397	0.00730446	0.667102	218870_at	ARHGAP15	down	55843
634	0.777449	7.45269	4.25321	0.000190511	0.00730446	0.666538	225548_at	SHROOM3	up	57619
635	0.685771	12.2466	4.25075	0.000191814	0.00734928	0.660108	201841_s_at	HSPB1	up	3315
636	0.763795	4.49909	4.24759	0.000193505	0.00740889	0.651831	225996_at	LONRF2	up	164832
637	0.472521	5.29881	4.24383	0.000195537	0.00746652	0.641981	205833_s_at	PART1	stable	25859
638	-0.320704	7.03451	-4.24267	0.00019617	0.00748043	0.638935	218188_s_at	TIMM13	stable	26517
639	-0.342046	6.5706	-4.24221	0.000196419	0.00748043	0.637737	203981_s_at	ABCD4	stable	5826
640	0.391076	9.95432	4.24219	0.000196431	0.00748043	0.63768	203323_at	CAV2	stable	858
641	-0.247559	3.76404	-4.24184	0.00019662	0.00748101	0.636774	207734_at	LAX1	stable	54900
642	-1.68816	6.84708	-4.24134	0.000196895	0.00748624	0.635459	211742_s_at	EVI2B	down	2124
643	-0.239564	11.5772	-4.23571	0.000199996	0.00757114	0.620723	221700_s_at	UBA52	stable	7311
644	0.570346	7.18382	4.23001	0.00020318	0.00764547	0.605833	218309_at	CAMK2N1	up	55450
645	0.377829	8.80436	4.22805	0.000204289	0.00767665	0.6007	225125_at	MMGT1	stable	93380
646	-0.839198	8.42408	-4.22765	0.000204519	0.00768	0.599641	228665_at	CYYR1	down	116159
647	-0.623813	10.1269	-4.22205	0.000207717	0.00777653	0.585017	204955_at	SRPX	down	8406
648	-0.488533	10.0178	-4.21855	0.000209742	0.00780644	0.575869	209230_s_at	NUPR1	stable	26471
649	-0.347443	7.97919	-4.21816	0.000209969	0.00780955	0.574852	201576_s_at	GLB1	stable	2720
650	-0.345733	8.74505	-4.21586	0.000211316	0.00785431	0.568825	211068_x_at	WASHC2C	stable	253725
651	0.596634	6.49212	4.21001	0.000214769	0.0079486	0.553546	201823_s_at	RNF14	up	9604
652	-2.08402	7.1423	-4.20984	0.00021487	0.0079486	0.553103	209374_s_at	IGHM	down	3507
653	-0.755788	7.26439	-4.20818	0.000215863	0.00796149	0.54876	223640_at	HCST	down	10870
654	-0.355155	10.0399	-4.20804	0.000215947	0.00796149	0.548393	217962_at	NOP10	stable	55505
655	-0.946009	5.29332	-4.20426	0.000218219	0.00802902	0.538528	218039_at	NUSAP1	down	51203
656	1.05915	11.2885	4.20385	0.000218469	0.00803282	0.537449	203951_at	CNN1	up	1264
657	0.359445	10.3009	4.19978	0.000220945	0.00810748	0.526831	201425_at	ALDH2	stable	217
658	-1.65824	4.60114	-4.19904	0.000221398	0.00811781	0.524901	1568574_x_at	SPP1	down	6696
659	-0.339316	6.82817	-4.19884	0.000221523	0.00811781	0.524367	1555736_a_at	AGTRAP	stable	57085
660	-1.1334	6.41379	-4.19837	0.000221812	0.00812295	0.523139	1552701_a_at	CARD16	down	114769
661	-0.373337	8.46641	-4.1973	0.000222467	0.0081415	0.520358	217751_at	GSTK1	stable	373156
662	-0.668284	7.62493	-4.19353	0.000224808	0.00819898	0.510495	229910_at	SHE	down	126669
663	-0.888311	7.95403	-4.1932	0.000225011	0.00819898	0.509645	202411_at	IFI27	down	3429
664	-0.684485	5.90895	-4.19285	0.000225228	0.00819898	0.508736	206082_at	HCP5	down	10866
665	-0.372586	6.30931	-4.19284	0.000225238	0.00819898	0.508697	227060_at	RELT	stable	84957
666	-0.416583	4.98256	-4.19152	0.000226063	0.00821808	0.50525	225622_at	PAG1	stable	55824
667	-1.4288	7.1751	-4.19108	0.00022634	0.00822269	0.504097	206710_s_at	EPB41L3	down	23136
668	-0.540086	9.17595	-4.18705	0.00022888	0.00829841	0.493582	202603_at	ADAM10	down	102
669	-0.307844	10.0293	-4.18525	0.000230019	0.00832868	0.488903	208689_s_at	RPN2	stable	6185
670	-0.305006	9.70645	-4.1844	0.000230563	0.00834285	0.486678	218190_s_at	UQCR10	stable	29796
671	0.678269	6.93118	4.18242	0.000231829	0.00837757	0.48152	202541_at	AIMP1	up	9255
672	1.19845	8.40608	4.18188	0.000232179	0.0083813	0.480098	204364_s_at	REEP1	up	65055
673	-0.985461	6.94762	-4.18177	0.000232251	0.0083813	0.479806	219725_at	TREM2	down	54209
674	-0.371463	5.15498	-4.17955	0.000233684	0.0084057	0.474013	203744_at	HMGB3	stable	3149
675	-1.29891	6.5797	-4.17596	0.000236016	0.00846175	0.464657	202206_at	ARL4C	down	10123
676	0.345836	6.57172	4.17492	0.000236696	0.00848058	0.461947	213327_s_at	USP12	stable	219333
677	-0.315914	8.25413	-4.17402	0.000237288	0.00849064	0.459595	201126_s_at	MGAT1	stable	4245
678	-1.33227	9.09469	-4.16746	0.000241631	0.00861385	0.442507	212190_at	SERPINE2	down	5270
679	-1.41937	6.11234	-4.16632	0.0002424	0.00861708	0.439516	213060_s_at	CHI3L2	down	1117
680	0.34751	9.2792	4.16586	0.000242703	0.00861708	0.438338	203420_at	FAM8A1	stable	51439
681	-0.948124	5.05264	-4.16561	0.000242872	0.00861708	0.437682	204026_s_at	ZWINT	down	11130
682	-0.347818	4.98004	-4.16538	0.000243028	0.00861708	0.437081	204197_s_at	RUNX3	stable	864
683	0.748581	6.85485	4.16064	0.000246239	0.00865977	0.424716	203895_at	PLCB4	up	5332
684	0.44299	6.89493	4.16056	0.000246291	0.00865977	0.424518	217981_s_at	TIMM10B	stable	26515
685	0.834534	6.48503	4.15832	0.000247825	0.00869135	0.41867	203263_s_at	ARHGEF9	up	23229
686	-1.04736	7.56983	-4.15769	0.000248257	0.00869534	0.41703	219697_at	HS3ST2	down	9956
687	-0.446999	4.77808	-4.15455	0.000250418	0.00875345	0.408865	219684_at	RTP4	stable	64108
688	0.40098	3.9238	4.1536	0.000251076	0.00876041	0.406396	202965_s_at	CAPN6	stable	827
689	-0.502077	3.90853	-4.15245	0.000251875	0.00877711	0.403401	206978_at	CCR2	down	729230
690	0.399952	3.87137	4.15179	0.000252341	0.00878773	0.401662	1555279_at	ARMC8	stable	25852
691	-0.491384	4.73482	-4.15128	0.000252692	0.00879144	0.400353	207857_at	LILRA2	stable	11027
692	0.290617	8.95068	4.14881	0.000254427	0.00883227	0.393907	224641_at	FYTTD1	stable	84248
693	-0.358111	9.68497	-4.14726	0.000255522	0.00885203	0.389864	208626_s_at	VAT1	stable	10493
694	-0.564245	7.19159	-4.14223	0.000259095	0.00894884	0.376789	203704_s_at	RREB1	down	6239
695	0.321545	7.74251	4.1389	0.000261494	0.00900894	0.368109	212936_at	FAM172A	stable	83989
696	-1.18966	7.29315	-4.13649	0.000263244	0.00905014	0.361831	217235_x_at	IGLV@	down	3546
697	-0.287794	4.11952	-4.13617	0.000263473	0.00905014	0.36101	204092_s_at	AURKA	stable	6790
698	-0.300027	5.78688	-4.13611	0.000263518	0.00905014	0.360851	202509_s_at	TNFAIP2	stable	7127
699	-0.363118	6.6744	-4.13498	0.000264341	0.00906703	0.357914	219952_s_at	MCOLN1	stable	57192
700	0.23677	7.43841	4.13415	0.00026495	0.00908224	0.355746	213117_at	KLHL9	stable	55958
701	-0.249092	8.34912	-4.13172	0.000266736	0.00912056	0.349424	201716_at	SNX1	stable	6642
702	0.325716	7.24381	4.12943	0.000268429	0.00915511	0.343465	218626_at	EIF4ENIF1	stable	56478
703	-0.232332	8.72325	-4.12899	0.000268751	0.00915511	0.342338	223060_at	C14orf119	stable	55017
704	0.38184	6.63111	4.12804	0.000269457	0.00916541	0.339865	213970_at	RABL3	stable	285282
705	0.579306	6.08602	4.12695	0.000270272	0.00918404	0.337024	227688_at	LRCH2	up	57631
706	-0.51902	6.49508	-4.12627	0.000270784	0.0091908	0.335243	223158_s_at	NEK6	down	10783
707	0.389277	6.23231	4.12623	0.000270807	0.0091908	0.335161	219855_at	NUDT11	stable	55190
708	0.388986	4.12456	4.12524	0.00027155	0.0092103	0.332583	1552327_at	ARMCX4	stable	100131755
709	0.503457	4.74599	4.12412	0.000272392	0.00923313	0.329668	230893_at	DNAJC21	up	134218
710	0.4663	10.0157	4.12387	0.000272582	0.00923383	0.329013	200662_s_at	TOMM20	stable	9804
711	-1.79643	7.53581	-4.12204	0.000273966	0.00925198	0.324244	216207_x_at	IGKV1D-13	down	28902
712	0.681604	7.68051	4.12189	0.000274074	0.00925198	0.323872	1555191_a_at	FHL5	up	9457
713	-0.46184	5.63825	-4.12161	0.00027429	0.00925198	0.323133	218727_at	SLC38A7	stable	55238
714	0.439037	5.15349	4.12097	0.00027477	0.00926206	0.321485	212715_s_at	MICAL3	stable	57553
715	-0.750969	6.28235	-4.11974	0.000275709	0.00928799	0.318273	218322_s_at	ACSL5	down	51703
716	-0.518133	8.21773	-4.11909	0.000276205	0.00929896	0.316582	203167_at	TIMP2	down	7077
717	-1.95358	7.26479	-4.11672	0.000278017	0.0093542	0.310428	217378_x_at	IGKV1OR2-108	down	28862
718	-0.411082	5.49907	-4.11531	0.000279099	0.00938485	0.30677	218913_s_at	GMIP	stable	51291
719	-0.28729	7.89805	-4.10782	0.000284933	0.00954578	0.287299	224887_at	GNPTG	stable	84572
720	0.986974	6.07789	4.1037	0.00028819	0.00962065	0.276603	205413_at	MPPED2	up	744
721	0.674421	7.75623	4.10344	0.0002884	0.00962065	0.275919	204160_s_at	ENPP4	up	22875
722	-0.440868	7.44844	-4.10256	0.000289096	0.00963585	0.27365	238025_at	MLKL	stable	197259
723	0.450293	7.03527	4.1013	0.000290106	0.00965989	0.270368	218187_s_at	C8orf33	stable	65265
724	-0.273004	3.67498	-4.09989	0.000291238	0.0096858	0.266701	204962_s_at	CENPA	stable	1058
725	-0.448253	6.6328	-4.09547	0.00029481	0.00977012	0.255231	226007_at	ISCA2	stable	122961
726	-1.18618	6.54504	-4.09494	0.00029524	0.00977724	0.25386	203474_at	IQGAP2	down	10788
727	-0.657417	6.7317	-4.09402	0.000295993	0.00978562	0.251462	204134_at	PDE2A	down	5138
728	0.206991	5.83863	4.09288	0.000296922	0.00980326	0.248514	208957_at	ERP44	stable	23071
729	-0.286879	7.04364	-4.09186	0.000297759	0.00980441	0.245866	202841_x_at	OGFR	stable	11054
730	-0.466861	6.37146	-4.09165	0.00029793	0.00980441	0.245326	203879_at	PIK3CD	stable	5293
731	-0.980853	7.63823	-4.08539	0.000303117	0.00992392	0.229083	226789_at	EMB	down	133418
732	-0.466374	6.88935	-4.08311	0.00030503	0.00998058	0.223163	225638_at	COA6	stable	388753
733	-0.528705	6.25937	-4.08225	0.000305758	0.00999604	0.220923	204674_at	IRAG2	down	4033
734	-0.401653	6.26486	-4.08056	0.000307182	0.0100232	0.216551	221080_s_at	DENND1C	stable	79958
735	0.785951	7.50265	4.07763	0.000309673	0.0100722	0.208952	204749_at	NAP1L3	up	4675
736	-1.99373	7.16801	-4.07735	0.000309912	0.010074	0.208227	203936_s_at	MMP9	down	4318
737	-0.286939	5.99261	-4.07687	0.000310322	0.0100808	0.206983	203228_at	PAFAH1B3	stable	5050
738	-0.818508	9.48864	-4.07509	0.000311848	0.0101072	0.202369	202295_s_at	CTSH	down	1512
739	-0.417386	6.06279	-4.0739	0.00031287	0.010116	0.19929	238062_at	GPIHBP1	stable	338328
740	0.691225	6.47165	4.07323	0.000313449	0.0101287	0.197551	209242_at	PEG3	up	5178
741	0.319126	5.14239	4.07161	0.000314851	0.010162	0.193352	220311_at	N6AMT1	stable	29104
742	0.647906	5.2637	4.06834	0.000317705	0.010236	0.184865	220334_at	RGS17	up	26575
743	-1.0228	6.70338	-4.06724	0.000318663	0.0102548	0.182032	205798_at	IL7R	down	3575
744	-0.249941	6.02883	-4.06494	0.000320693	0.010308	0.17606	218399_s_at	CDCA4	stable	55038
745	0.345824	6.44931	4.06456	0.000321027	0.0103127	0.17508	212666_at	SMURF1	stable	57154
746	-0.774535	6.53096	-4.06411	0.00032143	0.0103135	0.1739	213716_s_at	SECTM1	down	6398
747	-0.526375	5.13292	-4.06262	0.000322746	0.010341	0.170058	215501_s_at	DUSP10	down	11221
748	0.964062	6.00422	4.0625	0.000322854	0.010341	0.169744	1553132_a_at	TC2N	up	123036
749	-0.521357	7.58301	-4.05536	0.000329261	0.0104909	0.151261	218825_at	EGFL7	down	51162
750	-0.853497	5.21459	-4.05478	0.000329794	0.0105017	0.149742	219403_s_at	HPSE	down	10855
751	-0.747968	8.02948	-4.05309	0.000331328	0.0105444	0.145378	205326_at	RAMP3	down	10268
752	-0.415388	6.62819	-4.05108	0.000333165	0.0105797	0.140178	219344_at	SLC29A3	stable	55315
753	0.52782	5.85036	4.05031	0.000333873	0.0105885	0.138181	221003_s_at	CAB39L	up	81617
754	-0.414439	8.67339	-4.04951	0.000334609	0.0106057	0.13611	218066_at	SLC12A7	stable	10723
755	-0.337244	8.01588	-4.0468	0.000337117	0.0106666	0.129089	222216_s_at	MRPL17	stable	63875
756	0.411525	7.80013	4.04612	0.000337747	0.0106804	0.127332	217830_s_at	NSFL1C	stable	55968
757	-0.80615	7.1295	-4.04401	0.000339714	0.0107211	0.121873	228153_at	RNF144B	down	255488
758	-0.54712	6.61017	-4.04387	0.000339841	0.0107211	0.121522	202005_at	ST14	down	6768
759	0.924732	6.36534	4.04328	0.000340394	0.0107211	0.119993	234980_at	TLCD4	up	148534
760	0.59711	4.52271	4.0431	0.00034057	0.0107211	0.119508	1554755_a_at	MTUS2	up	23281
761	-0.463241	4.32931	-4.04136	0.000342196	0.0107588	0.115028	230252_at	LPAR5	stable	57121
762	0.214	9.381	4.04093	0.000342607	0.0107641	0.113901	201174_s_at	TERF2IP	stable	54386
763	-0.337535	6.27232	-4.04077	0.000342758	0.0107641	0.113485	205418_at	FES	stable	2242
764	-0.48858	7.31987	-4.03973	0.000343742	0.0107888	0.110789	221539_at	EIF4EBP1	stable	1978
765	-0.434674	3.95343	-4.03837	0.000345029	0.0108106	0.107275	218755_at	KIF20A	stable	10112
766	0.903139	9.92369	4.03238	0.000350754	0.0109154	0.091805	225911_at	NPNT	up	255743
767	-0.91104	6.03256	-4.03237	0.00035077	0.0109154	0.0917602	204971_at	CSTA	down	1475
768	0.530455	5.28741	4.03177	0.000351349	0.0109272	0.0902115	227848_at	PEBP4	up	157310
769	0.813061	7.66469	4.03126	0.000351843	0.0109359	0.0888907	203108_at	GPRC5A	up	9052
770	-0.767305	6.81074	-4.03107	0.000352028	0.0109359	0.0883951	219761_at	CLEC1A	down	51267
771	-0.904157	7.95894	-4.02919	0.000353851	0.0109676	0.0835408	204249_s_at	LMO2	down	4005
772	-0.424768	8.60189	-4.0281	0.00035491	0.0109897	0.0807322	201089_at	ATP6V1B2	stable	526
773	-0.755212	6.8865	-4.02786	0.000355147	0.0109897	0.0801039	203320_at	SH2B3	down	10019
774	0.516095	6.67326	4.02739	0.000355603	0.0109897	0.0788985	218675_at	SLC22A17	up	51310
775	-0.309032	4.76149	-4.02713	0.000355857	0.0109897	0.0782269	231776_at	EOMES	stable	8320
776	-0.418041	8.68941	-4.02669	0.000356291	0.0109897	0.0770798	202605_at	GUSB	stable	2990
777	-0.605457	11.4523	-4.02666	0.000356316	0.0109897	0.0770154	200872_at	S100A10	down	6281
778	-0.588529	8.60383	-4.0266	0.000356373	0.0109897	0.0768639	1553906_s_at	FGD2	down	221472
779	-0.373317	8.50824	-4.02386	0.000359076	0.0110481	0.0697619	218086_at	NPDC1	stable	56654
780	0.597798	5.79134	4.02269	0.000360224	0.0110772	0.0667611	1568954_s_at	C16orf72	up	29035
781	0.451245	8.02895	4.02227	0.000360644	0.0110839	0.0656651	218323_at	RHOT1	stable	55288
782	-0.415399	7.31082	-4.02123	0.000361677	0.0110907	0.0629766	213061_s_at	NTAN1	stable	123803
783	-0.332958	6.69175	-4.01861	0.000364289	0.011152	0.0562127	202860_at	DENND4B	stable	9909
784	0.186329	3.23779	4.01813	0.000364769	0.0111604	0.054977	1553423_a_at	SLFN13	stable	146857
785	-0.643726	7.26746	-4.01709	0.00036582	0.0111738	0.0522725	209040_s_at	PSMB8	down	5696
786	1.0455	6.77631	4.01452	0.000368408	0.0112404	0.045645	221276_s_at	SYNC	up	81493
787	-0.519963	11.5109	-4.01096	0.000372024	0.0113191	0.0364661	201852_x_at	COL3A1	down	1281
788	0.54637	7.92967	4.00925	0.000373782	0.0113458	0.0320364	204042_at	WASF3	up	10810
789	0.533582	6.69181	4.00816	0.0003749	0.0113629	0.0292299	213547_at	CAND2	up	23066
790	-0.271189	4.72191	-4.00393	0.000379277	0.0114886	0.0183225	206805_at	SEMA3A	stable	10371
791	0.84703	5.95265	4.00304	0.000380212	0.0115106	0.0160074	228062_at	NAP1L5	up	266812
792	-1.42862	6.26565	-4.00283	0.000380434	0.0115109	0.0154603	209606_at	CYTIP	down	9595
793	0.412573	4.77316	4.00047	0.000382906	0.0115537	0.00937357	223593_at	AADAT	stable	51166
794	0.618611	6.63039	3.99935	0.000384076	0.0115735	0.00650528	213549_at	PDZD8	up	118987
795	0.439333	7.37098	3.99832	0.000385171	0.0115901	0.00383043	227386_s_at	TMEM200B	stable	399474
796	0.392853	7.8914	3.99552	0.000388138	0.011673	-0.00337846	201462_at	SCRN1	stable	9805
797	-0.285926	7.97764	-3.99375	0.000390035	0.0117193	-0.00796029	204168_at	MGST2	stable	4258
798	-0.356209	6.51259	-3.99349	0.000390311	0.0117193	-0.00862451	223173_at	SPNS1	stable	83985
799	-0.373521	10.2732	-3.99169	0.00039224	0.0117575	-0.0132558	200983_x_at	CD59	stable	966
800	-1.01326	8.06143	-3.98997	0.000394099	0.0118003	-0.0176969	218501_at	ARHGEF3	down	50650
801	0.796641	6.05195	3.9891	0.000395035	0.0118154	-0.0199257	227705_at	TCEAL7	up	56849
802	-1.14084	7.10691	-3.98655	0.000397815	0.011879	-0.0265142	202934_at	HK2	down	3099
803	0.909091	6.88719	3.98541	0.000399063	0.0119098	-0.0294561	1569149_at	PDLIM7	up	9260
804	0.504671	10.8852	3.98257	0.000402179	0.0119767	-0.0367643	212233_at	MAP1B	up	4131
805	-0.506303	7.25258	-3.98091	0.000404012	0.0120051	-0.0410361	218614_at	RESF1	down	55196
806	-0.562357	3.58446	-3.97897	0.000406172	0.0120562	-0.0460447	1552365_at	SCIN	down	85477
807	0.387366	6.74534	3.97467	0.000410992	0.0121775	-0.057124	212641_at	HIVEP2	stable	3097
808	-0.246595	10.7278	-3.97427	0.000411441	0.0121775	-0.0581504	207157_s_at	GNG5	stable	2787
809	0.607888	5.63975	3.97413	0.000411595	0.0121775	-0.0585007	226946_at	NADK2	up	133686
810	0.568366	6.30157	3.97324	0.000412607	0.0121945	-0.0608086	218499_at	STK26	up	51765
811	1.15526	7.2319	3.97323	0.000412616	0.0121945	-0.0608281	227819_at	LGR6	up	59352
812	-0.297526	3.85112	-3.97248	0.000413467	0.012213	-0.0627641	204750_s_at	DSC2	stable	1824
813	-0.785471	6.3417	-3.96503	0.000421987	0.0124195	-0.0819198	203388_at	ARRB2	down	409
814	-0.61321	5.37082	-3.96498	0.000422049	0.0124195	-0.0820567	219414_at	CLSTN2	down	64084
815	0.30244	6.93885	3.96236	0.000425088	0.012489	-0.0887956	206853_s_at	MAP3K7	stable	6885
816	0.333939	10.6672	3.96216	0.000425323	0.012489	-0.0893142	201599_at	OAT	stable	4942
817	0.469355	8.16476	3.95698	0.000431398	0.0126335	-0.10263	202704_at	TOB1	stable	10140
818	0.381093	6.00324	3.95387	0.000435093	0.0126938	-0.11064	225972_at	TMEM64	stable	169200
819	-0.453363	8.8993	-3.95229	0.000436985	0.0127084	-0.114712	218495_at	UXT	stable	8409
820	-0.51046	5.11605	-3.95201	0.000437313	0.0127084	-0.115418	214755_at	UAP1L1	down	91373
821	0.46878	6.8569	3.95194	0.000437398	0.0127084	-0.1156	203581_at	RAB4A	stable	5867
822	-0.365075	7.90064	-3.95154	0.000437874	0.0127084	-0.116622	202382_s_at	GNPDA1	stable	10007
823	0.226083	3.84575	3.95151	0.000437909	0.0127084	-0.116697	203223_at	RABEP1	stable	9135
824	0.270747	7.66648	3.95075	0.000438827	0.0127283	-0.118661	207614_s_at	CUL1	stable	8454
825	0.381015	7.17415	3.94997	0.000439764	0.0127487	-0.120665	204400_at	EFS	stable	10278
826	0.957985	4.96564	3.94832	0.000441756	0.0127929	-0.124906	219772_s_at	SMPX	up	23676
827	0.300749	5.50894	3.94391	0.00044712	0.0129242	-0.136238	1558604_a_at	SSBP2	stable	23635
828	0.382326	7.16407	3.94382	0.000447237	0.0129242	-0.136483	205047_s_at	ASNS	stable	440
829	-2.41981	7.39552	-3.94266	0.000448656	0.012932	-0.139457	211645_x_at	IGKV1-17	down	28937
830	-1.4366	9.09354	-3.94244	0.000448924	0.012932	-0.140018	203305_at	F13A1	down	2162
831	0.461026	6.33524	3.93511	0.000458023	0.0131525	-0.158854	203641_s_at	COBLL1	stable	22837
832	0.522585	7.32311	3.93421	0.000459151	0.0131772	-0.161161	202165_at	PPP1R2	up	5504
833	0.639261	6.04829	3.93388	0.000459563	0.0131772	-0.162003	1559477_s_at	MEIS1	up	4211
834	-0.274178	5.5908	-3.93385	0.000459604	0.0131772	-0.162088	205129_at	NPM3	stable	10360
835	0.338866	8.76253	3.93316	0.000460466	0.013195	-0.163846	212229_s_at	FBXO21	stable	23014
836	-0.910095	7.90519	-3.9298	0.000464722	0.0132917	-0.172481	212950_at	ADGRF5	down	221395
837	-0.630838	3.95222	-3.92834	0.000466578	0.013299	-0.176222	220146_at	TLR7	down	51284
838	-1.14388	6.82556	-3.92704	0.000468236	0.0133268	-0.179552	219032_x_at	OPN3	down	23596
839	0.277663	9.06315	3.9266	0.0004688	0.0133283	-0.18068	204640_s_at	SPOP	stable	8405
840	0.429841	4.69789	3.92643	0.00046902	0.0133283	-0.181122	235004_at	RBM24	stable	221662
841	0.194458	4.7374	3.92526	0.000470528	0.0133573	-0.184134	232294_at	TMEM254-AS1	stable	219347
842	-0.722476	10.0343	-3.9237	0.000472543	0.0133998	-0.188144	202992_at	C7	down	730
843	-0.315845	8.08456	-3.92353	0.000472761	0.0133998	-0.188577	202185_at	PLOD3	stable	8985
844	0.372583	6.61563	3.9222	0.00047448	0.0134346	-0.191982	226258_at	AMN1	stable	196394
845	-1.21543	7.23383	-3.91978	0.00047763	0.0134958	-0.198191	235306_at	GIMAP8	down	155038
846	0.349695	4.7644	3.91581	0.000482843	0.0135981	-0.208378	1569796_s_at	ATRNL1	stable	26033
847	-0.460073	5.42448	-3.91551	0.00048324	0.0135981	-0.209149	214390_s_at	BCAT1	stable	586
848	0.207409	3.80717	3.91293	0.000486656	0.0136731	-0.215759	1555350_at	PPHLN1	stable	51535
849	-0.327028	5.68055	-3.91099	0.000489235	0.013734	-0.220717	203036_s_at	MTSS1	stable	9788
850	-0.320695	4.33384	-3.91037	0.000490064	0.0137477	-0.222306	203276_at	LMNB1	stable	4001
851	-1.13576	9.34222	-3.91011	0.00049042	0.0137506	-0.222986	201645_at	TNC	down	3371
852	0.585314	10.4654	3.90945	0.000491306	0.0137563	-0.22468	201539_s_at	FHL1	up	2273
853	0.513637	6.05989	3.90832	0.000492826	0.0137826	-0.227579	1557795_s_at	NTRK3	up	4916
854	-0.416789	4.52406	-3.90608	0.000495843	0.0138388	-0.233304	210164_at	GZMB	stable	3002
855	0.309484	3.69449	3.90531	0.00049689	0.013849	-0.235282	215307_at	ZNF529	stable	57711
856	0.53006	6.6556	3.905	0.000497306	0.0138513	-0.236067	212957_s_at	LINC01278	up	92249
857	-0.638787	7.21209	-3.90433	0.000498226	0.0138699	-0.237802	223220_s_at	PARP9	down	83666
858	0.327576	5.55111	3.89867	0.000505987	0.0140431	-0.252302	209556_at	NCDN	stable	23154
859	-0.503496	6.03608	-3.8971	0.000508155	0.0140889	-0.256312	221058_s_at	CKLF	down	51192
860	-0.299918	7.27852	-3.89174	0.000515639	0.0142293	-0.270025	221073_s_at	NOD1	stable	10392
861	0.698908	7.10806	3.88933	0.000519052	0.0142774	-0.276213	205805_s_at	ROR1	up	4919
862	-0.535886	6.23495	-3.88927	0.00051913	0.0142774	-0.276353	219202_at	RHBDF2	down	79651
863	-0.612947	8.18749	-3.88816	0.000520707	0.0143135	-0.279198	225415_at	DTX3L	down	151636
864	0.455841	3.77767	3.886	0.000523788	0.0143621	-0.284731	214725_at	SBSPON	stable	157869
865	0.27748	8.55254	3.88534	0.000524728	0.0143807	-0.286412	212333_at	FAM98A	stable	25940
866	-0.422041	3.97905	-3.88497	0.00052526	0.0143881	-0.287363	204285_s_at	PMAIP1	stable	5366
867	1.04872	5.95866	3.88446	0.000525993	0.0144009	-0.288671	1554757_a_at	INPP5A	up	3632
868	-0.429735	4.12349	-3.88403	0.000526606	0.0144055	-0.289762	220005_at	P2RY13	stable	53829
869	-0.371826	5.35027	-3.88397	0.000526685	0.0144055	-0.289903	203716_s_at	DPP4	stable	1803
870	0.436898	4.84184	3.88311	0.000527922	0.0144321	-0.292104	229313_at	ANO5	stable	203859
871	0.289613	8.46577	3.88275	0.000528442	0.0144374	-0.293026	201142_at	EIF2S1	stable	1965
872	-0.448739	5.9527	-3.88261	0.000528643	0.0144374	-0.293384	203110_at	PTK2B	stable	2185
873	-0.225884	7.85875	-3.88242	0.000528925	0.0144378	-0.293883	201771_at	SCAMP3	stable	10067
874	0.216304	11.1264	3.88218	0.000529276	0.0144402	-0.294505	200627_at	PTGES3	stable	10728
875	0.624014	6.83864	3.88178	0.000529841	0.0144449	-0.295506	1555270_a_at	WFS1	up	7466
876	0.38907	11.2634	3.88169	0.000529977	0.0144449	-0.295746	208669_s_at	EID1	stable	23741
877	-1.04838	7.04484	-3.87971	0.000532843	0.0145085	-0.300803	208850_s_at	THY1	down	7070
878	-0.287488	8.99078	-3.87834	0.000534838	0.0145484	-0.304308	218563_at	NDUFA3	stable	4696
879	-1.40254	5.46661	-3.87764	0.000535865	0.0145691	-0.306106	205681_at	BCL2A1	down	597
880	0.333866	9.06359	3.87736	0.000536276	0.014573	-0.306825	1554868_s_at	PCNP	stable	57092
881	-0.302725	4.17514	-3.87638	0.000537704	0.0145901	-0.309319	239287_at	LINC01857	stable	102724714
882	-0.299888	8.96241	-3.87582	0.000538524	0.0146051	-0.310748	223017_at	TXNDC12	stable	51060
883	-1.1759	6.55563	-3.87507	0.000539637	0.0146193	-0.312684	214038_at	CCL8	down	6355
884	-0.476733	5.67939	-3.87269	0.000543143	0.0146996	-0.318755	204200_s_at	PDGFB	stable	5155
885	-0.231483	7.69557	-3.8708	0.000545949	0.0147261	-0.323587	209302_at	POLR2H	stable	5437
886	-0.356621	5.37602	-3.86733	0.000551143	0.0148442	-0.332463	218872_at	TESC	stable	54997
887	0.163034	3.29261	3.86631	0.000552663	0.0148716	-0.335046	229160_at	PWWP3B	stable	139221
888	-0.631113	8.47017	-3.86629	0.000552704	0.0148716	-0.335115	206662_at	GLRX	down	2745
889	0.243948	6.82783	3.86419	0.000555864	0.0149419	-0.340459	224486_s_at	CDIN1	stable	84529
890	-1.21341	5.29243	-3.8622	0.000558895	0.0150013	-0.345556	235751_s_at	VMO1	down	284013
891	0.441483	7.80945	3.86012	0.000562072	0.0150644	-0.350871	219440_at	RAI2	stable	10742
892	0.370518	4.85992	3.8594	0.000563171	0.015079	-0.352701	222016_s_at	ZSCAN31	stable	64288
893	-0.941817	4.1783	-3.85905	0.000563713	0.0150862	-0.353603	201890_at	RRM2	down	6241
894	-0.288173	10.842	-3.85416	0.000571269	0.0152585	-0.366083	202252_at	RAB13	stable	5872
895	0.449499	6.87394	3.8513	0.000575731	0.0153702	-0.373375	202959_at	MMUT	stable	4594
896	-0.249878	8.10766	-3.85019	0.000577481	0.0154019	-0.37622	216483_s_at	MYDGF	stable	56005
897	0.596648	5.31853	3.84963	0.000578355	0.0154105	-0.377637	230920_at	TRABD2B	up	388630
898	-0.48051	5.90263	-3.84285	0.000589129	0.0156438	-0.394934	238226_at	TMEM255B	stable	348013
899	-1.3661	9.19794	-3.84191	0.000590629	0.0156608	-0.397316	203645_s_at	CD163	down	9332
900	0.388707	5.38813	3.84076	0.000592491	0.015695	-0.400266	227976_at	SMIM10	stable	644538
901	-0.691856	9.22734	-3.83919	0.000595022	0.0157364	-0.404259	221529_s_at	PLVAP	down	83483
902	0.51521	5.36371	3.83822	0.000596585	0.0157576	-0.406718	224365_s_at	TIGD7	up	91151
903	0.535101	6.0064	3.83742	0.000597891	0.0157769	-0.408767	1556121_at	NAP1L1	up	4673
904	-0.313787	8.27829	-3.83625	0.000599797	0.0158043	-0.411749	206656_s_at	APMAP	stable	57136
905	-0.274888	5.95681	-3.83234	0.000606207	0.0159501	-0.421708	205291_at	IL2RB	stable	3560
906	0.331057	7.21434	3.83213	0.000606551	0.0159515	-0.422239	202814_s_at	HEXIM1	stable	10614
907	-0.379099	7.54523	-3.83167	0.000607308	0.0159637	-0.423408	201584_s_at	DDX39A	stable	10212
908	-0.353536	8.07021	-3.83101	0.000608406	0.0159772	-0.425099	213682_at	NUP50	stable	10762
909	-0.765613	6.58035	-3.8302	0.000609753	0.0160049	-0.427172	224414_s_at	CARD6	down	84674
910	0.345345	5.09149	3.82989	0.000610265	0.0160107	-0.427958	219998_at	LGALSL	stable	29094
911	0.881632	5.67804	3.82885	0.000611984	0.0160404	-0.430593	226803_at	CHMP4C	up	92421
912	0.444453	6.18852	3.82707	0.000614953	0.0160991	-0.435127	223594_at	TMEM117	stable	84216
913	-0.416267	3.48419	-3.82625	0.00061633	0.0160991	-0.437222	205884_at	ITGA4	stable	3676
914	0.613422	8.68853	3.82615	0.00061649	0.0160991	-0.437465	202719_s_at	TES	up	26136
915	0.319909	13.3747	3.82576	0.000617158	0.0160991	-0.43848	200974_at	ACTA2	stable	59
916	0.922823	9.02768	3.82561	0.00061741	0.0160991	-0.438863	201559_s_at	CLIC4	up	25932
917	0.523179	5.75891	3.82384	0.000620376	0.0161519	-0.443351	205610_at	MYOM1	up	8736
918	-0.412661	6.47758	-3.82178	0.000623864	0.016235	-0.448603	230807_at	ODAD3	stable	115948
919	-0.745545	7.33207	-3.82122	0.000624815	0.016252	-0.45003	204070_at	PLAAT4	down	5920
920	0.667945	5.69681	3.81877	0.000628987	0.0163372	-0.456263	213040_s_at	NPTXR	up	23467
921	-0.437242	8.22287	-3.81741	0.000631312	0.0163634	-0.45972	200846_s_at	PPP1CA	stable	5499
922	-0.347647	5.02064	-3.81722	0.000631632	0.0163634	-0.460194	210321_at	GZMH	stable	2999
923	-0.89504	9.07813	-3.81676	0.000632421	0.0163634	-0.461363	210512_s_at	VEGFA	down	7422
924	-0.588119	6.74903	-3.81607	0.00063361	0.0163718	-0.463123	217897_at	FXYD6	down	53826
925	0.510103	5.45648	3.81199	0.000640682	0.0164834	-0.473517	226610_at	CENPV	up	201161
926	-0.502841	8.04937	-3.81142	0.000641677	0.0164882	-0.474971	201410_at	PLEKHB2	down	55041
927	0.442238	7.96082	3.80962	0.000644806	0.0165287	-0.479526	202930_s_at	SUCLA2	stable	8803
928	0.463777	5.16167	3.80701	0.000649391	0.0166251	-0.486161	219973_at	ARSJ	stable	79642
929	0.668373	4.36846	3.80055	0.000660877	0.0168344	-0.502578	236644_at	RNF180	up	285671
930	0.537716	8.12795	3.80045	0.000661061	0.0168344	-0.502838	205330_at	MN1	up	4330
931	0.822107	10.7226	3.79935	0.000663047	0.0168671	-0.505646	204938_s_at	PLN	up	5350
932	-1.57799	6.59186	-3.79922	0.000663268	0.0168671	-0.505959	205568_at	AQP9	down	366
933	0.336479	7.10558	3.79691	0.000667442	0.0169496	-0.511832	225679_at	NAA30	stable	122830
934	0.344045	8.08917	3.79656	0.000668072	0.0169498	-0.512715	202123_s_at	ABL1	stable	25
935	-0.456202	3.98233	-3.79605	0.000669	0.0169582	-0.514015	214710_s_at	CCNB1	stable	891
936	-0.364348	7.97543	-3.79544	0.000670106	0.0169582	-0.515562	225272_at	SAT2	stable	112483
937	-0.548918	9.44949	-3.79536	0.000670263	0.0169582	-0.515781	200742_s_at	TPP1	down	1200
938	0.593055	8.37938	3.79476	0.000671341	0.0169648	-0.517285	227917_at	LOC100506990	up	100506990
939	0.607442	4.95126	3.79402	0.000672692	0.0169882	-0.519168	212797_at	SORT1	up	6272
940	-0.669006	8.01785	-3.79128	0.000677707	0.0170675	-0.52612	203066_at	CHST15	down	51363
941	-0.524681	7.05644	-3.78998	0.00068011	0.0171121	-0.529433	228677_s_at	RASAL3	down	64926
942	0.36224	8.17335	3.78981	0.000680415	0.0171121	-0.529853	1555780_a_at	RHEB	stable	6009
943	-1.47237	8.49979	-3.78919	0.000681569	0.0171332	-0.531439	203868_s_at	VCAM1	down	7412
944	-0.161461	4.18984	-3.78899	0.000681937	0.0171346	-0.531945	223901_at	SYT3	stable	84258
945	0.574683	7.69698	3.78631	0.000686901	0.0172274	-0.538734	208740_at	SAP18	up	10284
946	-0.294803	7.40612	-3.78557	0.000688282	0.0172437	-0.540614	218291_at	LAMTOR2	stable	28956
947	0.541214	8.69435	3.78479	0.000689747	0.0172647	-0.542604	225658_at	SPOPL	up	339745
948	-0.293835	9.31426	-3.78442	0.000690432	0.0172647	-0.543533	227998_at	S100A16	stable	140576
949	-0.322085	9.12952	-3.78434	0.000690587	0.0172647	-0.543743	200055_at	TAF10	stable	6881
950	-0.484403	7.41803	-3.78348	0.000692196	0.017297	-0.545922	210044_s_at	LYL1	stable	4066
951	-0.303811	6.5489	-3.78184	0.000695276	0.0173581	-0.550077	205247_at	NOTCH4	stable	4855
952	-0.426321	11.4607	-3.78084	0.000697177	0.0173836	-0.552632	200958_s_at	SDCBP	stable	6386
953	1.08812	6.97444	3.77649	0.000705441	0.0175478	-0.56366	218824_at	PNMA8A	up	55228
954	-0.323122	5.34714	-3.77376	0.000710678	0.0176539	-0.570582	203528_at	SEMA4D	stable	10507
955	-1.28375	6.41955	-3.77335	0.000711469	0.0176656	-0.571623	209596_at	MXRA5	down	25878
956	-0.533188	7.02725	-3.77209	0.000713891	0.0177016	-0.574804	234725_s_at	SEMA4B	down	10509
957	-0.279354	3.3552	-3.77168	0.000714686	0.0177133	-0.575845	219493_at	SHCBP1	stable	79801
958	-0.414279	10.2077	-3.77146	0.000715108	0.0177157	-0.576397	201004_at	SSR4	stable	6748
959	-0.571006	6.34781	-3.77026	0.000717448	0.0177656	-0.579454	219191_s_at	BIN2	down	51411
960	-0.356795	5.4033	-3.7695	0.000718929	0.0177942	-0.581383	220471_s_at	MYCT1	stable	80177
961	0.76621	6.4333	3.76868	0.000720516	0.0178215	-0.583446	228182_at	ADCY5	up	111
962	-0.46095	5.96489	-3.76856	0.000720744	0.0178215	-0.583743	203927_at	NFKBIE	stable	4794
963	0.418385	6.52585	3.76836	0.000721141	0.0178215	-0.584258	212818_s_at	ASB1	stable	51665
964	0.475142	8.28672	3.76795	0.000721936	0.0178221	-0.585288	212062_at	ATP9A	stable	10079
965	0.322904	7.94698	3.76792	0.00072201	0.0178221	-0.585385	225128_at	POGLUT3	stable	143888
966	0.718322	10.2602	3.76681	0.00072417	0.0178493	-0.58818	226769_at	FIBIN	up	387758
967	-0.406637	3.82891	-3.76673	0.000724339	0.0178493	-0.588398	218585_s_at	DTL	stable	51514
968	-0.278912	6.96331	-3.76595	0.00072586	0.0178768	-0.590361	205508_at	SCN1B	stable	6324
969	-0.983042	6.02725	-3.7641	0.000729506	0.0179474	-0.595048	227300_at	TMEM119	down	338773
970	0.402906	5.45825	3.76373	0.000730234	0.0179474	-0.595981	227699_at	L3HYPDH	stable	112849
971	-0.478044	3.61797	-3.76366	0.000730368	0.0179474	-0.596153	201291_s_at	TOP2A	stable	7153
972	-0.402363	7.6479	-3.76323	0.000731232	0.0179605	-0.597259	227853_at	PLBD2	stable	196463
973	-0.384394	7.64705	-3.75864	0.000740374	0.0181199	-0.608883	212794_s_at	WASHC4	stable	23325
974	-0.426592	6.32158	-3.7536	0.000750535	0.0183031	-0.621634	210629_x_at	LST1	stable	7940
975	0.508087	4.58396	3.75268	0.000752403	0.0183404	-0.623959	205893_at	NLGN1	up	22871
976	-0.384072	5.90659	-3.75187	0.00075406	0.0183726	-0.626016	204867_at	GCHFR	stable	2644
977	0.32422	8.57467	3.74948	0.000758952	0.0184507	-0.632065	205120_s_at	SGCB	stable	6443
978	0.601133	8.57575	3.74699	0.000764079	0.0185506	-0.638362	202118_s_at	CPNE3	up	8895
979	-0.581582	7.35863	-3.74531	0.000767553	0.0185854	-0.642604	221814_at	ADGRA2	down	25960
980	-0.413742	5.94714	-3.74476	0.000768695	0.0186049	-0.643996	206099_at	PRKCH	stable	5583
981	0.465386	8.10881	3.74442	0.00076939	0.0186135	-0.644841	212533_at	WEE1	stable	7465
982	-1.19114	6.58392	-3.74409	0.000770077	0.0186218	-0.645675	202888_s_at	ANPEP	down	290
983	0.281195	9.49644	3.73921	0.000780304	0.0188441	-0.658012	201023_at	TAF7	stable	6879
984	-0.488799	6.89565	-3.73887	0.000781033	0.0188489	-0.658886	211518_s_at	BMP4	stable	652
985	0.703591	9.14836	3.73728	0.000784385	0.0188824	-0.66289	203810_at	DNAJB4	up	11080
986	-0.535771	6.45256	-3.73716	0.000784649	0.0188824	-0.663206	232154_at	ADM5	down	199800
987	-0.863329	10.543	-3.73307	0.000793371	0.0190541	-0.673541	202112_at	VWF	down	7450
988	0.804776	7.01725	3.73286	0.000793809	0.0190541	-0.674058	205872_x_at	PDE4DIP	up	9659
989	-0.212902	8.65463	-3.7323	0.000795022	0.0190732	-0.675485	217978_s_at	UBE2Q1	stable	55585
990	-0.253152	4.85821	-3.72555	0.000809647	0.0193139	-0.692527	223583_at	TNFAIP8L2	stable	79626
991	-0.230628	7.25111	-3.72539	0.000809999	0.0193139	-0.692934	203985_at	ZNF212	stable	7988
992	-0.92158	6.87048	-3.72505	0.000810735	0.019323	-0.693783	218802_at	MCUB	down	55013
993	-0.37548	3.78474	-3.72487	0.000811119	0.0193237	-0.694226	208075_s_at	CCL7	stable	6354
994	-0.33394	4.28258	-3.71516	0.000832656	0.0196909	-0.718721	205891_at	ADORA2B	stable	136
995	-0.289922	3.63514	-3.71471	0.000833676	0.0197065	-0.719864	215966_x_at	GK3P	stable	2713
996	0.504066	6.29087	3.71256	0.000838515	0.0197953	-0.725274	213217_at	ADCY2	up	108
997	0.76145	7.63538	3.71235	0.000839007	0.0197983	-0.725822	225567_at	INAFM2	up	100505573
998	0.739637	7.29215	3.70998	0.000844384	0.0198888	-0.731792	225978_at	RIMKLB	up	57494
999	-0.432297	7.10109	-3.70971	0.000844998	0.0198888	-0.732472	209509_s_at	DPAGT1	stable	1798
1000	0.414891	5.94704	3.70905	0.000846512	0.0198981	-0.734144	230121_at	SERTAD4-AS1	stable	574036
1001	0.435489	4.07882	3.70846	0.000847844	0.0199209	-0.735613	233527_at	ESAM-AS1	stable	101929340
1002	-0.316957	7.58357	-3.70773	0.000849516	0.0199516	-0.737455	218168_s_at	COQ8A	stable	56997
1003	0.271044	11.1026	3.70716	0.000850818	0.0199592	-0.738886	200609_s_at	WDR1	stable	9948
1004	-0.882669	6.51138	-3.70663	0.00085205	0.0199682	-0.740238	204606_at	CCL21	down	6366
1005	-0.303637	9.24299	-3.70449	0.000856968	0.0200663	-0.745616	223376_s_at	BRI3	stable	25798
1006	-0.531354	6.15076	-3.704	0.000858107	0.0200843	-0.746857	206856_at	LILRB5	down	10990
1007	-0.511682	5.99244	-3.70381	0.000858543	0.0200859	-0.747332	213539_at	CD3D	down	915
1008	-0.429996	8.05545	-3.69904	0.000869648	0.020285	-0.75934	223306_at	EBPL	stable	84650
1009	0.651891	7.4574	3.69863	0.000870615	0.0202989	-0.760379	238021_s_at	CRNDE	up	643911
1010	-0.757695	6.44024	-3.69704	0.000874347	0.0203603	-0.764374	204205_at	APOBEC3G	down	60489
1011	-0.400664	6.19889	-3.69679	0.000874931	0.0203603	-0.764999	204269_at	PIM2	stable	11040
1012	-0.568504	6.24266	-3.69598	0.000876846	0.020392	-0.767041	218815_s_at	TMEM51	down	55092
1013	-0.321402	4.56205	-3.6932	0.000883443	0.0205105	-0.774043	239237_at	TRG-AS1	stable	100506776
1014	-0.914613	6.36172	-3.6929	0.00088415	0.0205125	-0.774791	219892_at	TM6SF1	down	53346
1015	0.35252	6.57311	3.69233	0.000885523	0.0205326	-0.77624	201948_at	GNL2	stable	29889
1016	-0.328864	7.43164	-3.69068	0.000889468	0.0205979	-0.780393	221006_s_at	SNX27	stable	81609
1017	-0.243813	9.86262	-3.6894	0.000892524	0.020659	-0.783597	200652_at	SSR2	stable	6746
1018	-0.628196	7.71951	-3.68915	0.000893126	0.020659	-0.784227	205756_s_at	F8	down	2157
1019	-0.239452	5.44823	-3.68893	0.000893653	0.0206598	-0.784777	203728_at	BAK1	stable	578
1020	-0.510648	7.58296	-3.68776	0.000896481	0.0207077	-0.787728	204158_s_at	TCIRG1	down	10312
1021	-0.448021	7.01684	-3.68557	0.000901779	0.0207949	-0.793233	202767_at	ACP2	stable	53
1022	0.324642	6.00043	3.6836	0.000906572	0.0208702	-0.798184	221790_s_at	LDLRAP1	stable	26119
1023	-0.890917	5.873	-3.6833	0.000907314	0.0208785	-0.798948	214560_at	FPR3	down	2359
1024	0.265323	4.02829	3.68019	0.000914948	0.02101	-0.806773	1569013_s_at	BMS1P20	stable	96610
1025	-1.47178	6.97094	-3.67576	0.000925923	0.0211997	-0.817908	206697_s_at	HP	down	3240
1026	0.394103	3.68646	3.6755	0.000926563	0.0212055	-0.818554	207178_s_at	FRK	stable	2444
1027	0.768484	5.49482	3.67415	0.000929942	0.021265	-0.821953	228654_at	SPIN4	up	139886
1028	0.52944	6.20223	3.67318	0.000932352	0.0213112	-0.82437	214951_at	SLC26A10	up	65012
1029	-0.365584	5.12929	-3.67062	0.000938803	0.0214228	-0.830808	219799_s_at	DHRS9	stable	10170
1030	-0.582803	7.88168	-3.6701	0.000940111	0.0214437	-0.832108	225414_at	RNF149	down	284996
1031	-0.60746	4.80455	-3.66751	0.000946674	0.0215485	-0.838603	205488_at	GZMA	down	3001
1032	0.415031	6.88908	3.66448	0.000954423	0.0216935	-0.846214	1558027_s_at	PRKAB2	stable	5565
1033	-0.797173	6.56547	-3.6643	0.000954879	0.0216935	-0.84666	1554168_a_at	SH3KBP1	down	30011
1034	-0.376524	5.04251	-3.66409	0.000955427	0.0216935	-0.847196	202870_s_at	CDC20	stable	991
1035	0.298263	6.99741	3.66252	0.000959462	0.0217556	-0.851131	219913_s_at	CRNKL1	stable	51340
1036	-0.479945	4.53648	-3.66212	0.000960506	0.0217607	-0.852146	204493_at	BID	stable	637
1037	-0.826123	5.90683	-3.6613	0.000962618	0.0217711	-0.854196	225864_at	LRATD2	down	157638
1038	-0.444632	9.6054	-3.66033	0.000965143	0.0218142	-0.856641	221269_s_at	SH3BGRL3	stable	83442
1039	-0.401091	6.00783	-3.66018	0.000965528	0.0218142	-0.857014	213715_s_at	KANK3	stable	256949
1040	-0.707179	8.05831	-3.65848	0.000969944	0.0218778	-0.861273	209955_s_at	FAP	down	2191
1041	-0.295151	9.17707	-3.65809	0.000970951	0.0218824	-0.862242	201762_s_at	PSME2	stable	5721
1042	0.208845	3.80504	3.65765	0.000972106	0.0218994	-0.863352	1559073_at	KDM4B	stable	23030
1043	-0.334352	6.93176	-3.65746	0.000972615	0.0219003	-0.863841	207375_s_at	IL15RA	stable	3601
1044	-0.397336	8.20849	-3.65733	0.000972944	0.0219003	-0.864157	209263_x_at	TSPAN4	stable	7106
1045	-1.57783	6.36193	-3.65687	0.000974145	0.0219083	-0.865308	214777_at	IGKV4-1	down	28908
1046	0.340194	7.69015	3.65602	0.000976365	0.0219316	-0.867432	201501_s_at	GRSF1	stable	2926
1047	-0.930809	10.7211	-3.65379	0.000982233	0.0220187	-0.873025	201744_s_at	LUM	down	4060
1048	-0.304654	5.81953	-3.65298	0.000984376	0.0220577	-0.87506	219040_at	CORO7	stable	79585
1049	-1.42765	6.31442	-3.65237	0.000985986	0.0220735	-0.876585	223620_at	GPR34	down	2857
1050	-0.610655	5.09165	-3.65164	0.000987935	0.0221012	-0.878428	219452_at	DPEP2	down	64174
1051	-0.892175	7.6915	-3.64967	0.000993156	0.0221712	-0.883347	228532_at	C1orf162	down	128346
1052	-0.49937	7.60171	-3.64877	0.00099556	0.0222005	-0.885604	212919_at	DCP2	stable	167227
1053	-0.52961	4.38847	-3.6486	0.00099603	0.0222005	-0.886044	219947_at	CLEC4A	down	50856
1054	0.304345	7.68631	3.64785	0.000998027	0.022236	-0.887913	221090_s_at	OGFOD1	stable	55239
1055	0.446703	5.26897	3.64683	0.00100077	0.0222581	-0.890472	207066_at	HRC	stable	3270
1056	0.43492	4.60951	3.64657	0.00100146	0.0222581	-0.891119	223652_at	AS3MT	stable	57412
1057	0.418163	6.76644	3.64479	0.00100627	0.0223468	-0.895588	202816_s_at	SS18	stable	6760
1058	-0.190516	3.16125	-3.64306	0.00101094	0.022405	-0.899909	1552899_at	LINC01312	stable	154089
1059	0.338092	5.79378	3.64042	0.00101812	0.0224954	-0.906516	226966_at	PRPF40B	stable	25766
1060	-0.266941	5.53613	-3.64035	0.00101831	0.0224954	-0.906689	228139_at	RIPK3	stable	11035
1061	-0.377052	4.08657	-3.63998	0.00101933	0.022501	-0.907622	1554503_a_at	OSCAR	stable	126014
1062	0.466365	6.47324	3.63996	0.00101939	0.022501	-0.907674	1555460_a_at	SLC39A6	stable	25800
1063	0.282796	4.11927	3.63919	0.00102149	0.0225293	-0.909599	215024_at	CCZ1B	stable	221960
1064	0.293099	10.6857	3.63847	0.00102347	0.0225546	-0.911399	208671_at	SERINC1	stable	57515
1065	0.346997	7.6473	3.63822	0.00102415	0.0225606	-0.912023	209142_s_at	UBE2G1	stable	7326
1066	0.660719	6.23926	3.63453	0.00103435	0.0227394	-0.921265	208213_s_at	KCNAB1	up	7881
1067	0.497954	5.44479	3.63399	0.00103584	0.0227519	-0.922616	235014_at	ILF3-DT	stable	147727
1068	0.367595	6.28562	3.63354	0.0010371	0.0227575	-0.923748	231764_at	CHRAC1	stable	54108
1069	-0.251331	4.3103	-3.63348	0.00103725	0.0227575	-0.923882	205268_s_at	ADD2	stable	119
1070	0.279796	9.07736	3.6332	0.00103805	0.0227659	-0.924603	224502_s_at	KIAA1191	stable	57179
1071	0.43071	7.00758	3.63225	0.00104068	0.0227971	-0.92696	213295_at	CYLD	stable	1540
1072	-1.17132	6.26725	-3.6308	0.00104473	0.0228758	-0.930589	204567_s_at	ABCG1	down	9619
1073	0.299498	10.1829	3.62935	0.00104882	0.0229348	-0.934232	202522_at	PITPNB	stable	23760
1074	-0.409741	8.22289	-3.62917	0.00104933	0.0229348	-0.934684	225955_at	METRNL	stable	284207
1075	0.490531	9.15103	3.62865	0.00105079	0.0229348	-0.935976	204045_at	TCEAL1	stable	9338
1076	0.463574	7.26085	3.62816	0.00105215	0.0229555	-0.937188	201397_at	PHGDH	stable	26227
1077	-1.26457	5.57547	-3.62394	0.00106412	0.0231336	-0.94774	212657_s_at	IL1RN	down	3557
1078	-0.388535	7.53783	-3.6214	0.00107141	0.0232459	-0.95411	223626_x_at	IFI27L2	stable	83982
1079	-0.38776	6.57895	-3.62086	0.00107295	0.0232607	-0.955445	225775_at	TSPAN33	stable	340348
1080	-0.373452	5.79702	-3.6203	0.00107456	0.0232772	-0.956845	212801_at	CIT	stable	11113
1081	-0.608587	5.79992	-3.62003	0.00107534	0.0232848	-0.95752	230966_at	IL4I1	down	259307
1082	-0.233908	4.08122	-3.61965	0.00107643	0.0232992	-0.958464	1562415_a_at	SPOCD1	stable	90853
1083	0.615929	6.77733	3.61659	0.00108531	0.0234635	-0.966126	207469_s_at	PIR	up	8544
1084	0.712993	6.73065	3.61642	0.0010858	0.0234649	-0.966551	209674_at	CRY1	up	1407
1085	0.38765	7.53724	3.61529	0.00108909	0.0234988	-0.969369	219431_at	ARHGAP10	stable	79658
1086	-0.767736	7.59014	-3.61187	0.0010991	0.0236587	-0.977896	202202_s_at	LAMA4	down	3910
1087	-0.252908	8.71335	-3.6112	0.00110107	0.0236918	-0.979567	200837_at	BCAP31	stable	10134
1088	-0.331387	7.13566	-3.6107	0.00110253	0.023712	-0.980808	227580_s_at	TECPR1	stable	25851
1089	-0.332201	10.2613	-3.61049	0.00110315	0.023712	-0.981333	200822_x_at	TPI1	stable	7167
1090	0.120136	3.15716	3.61044	0.00110331	0.023712	-0.981462	1569272_at	PIK3C3	stable	5289
1091	-0.415412	6.94287	-3.61002	0.00110457	0.0237298	-0.982528	218321_x_at	STYXL1	stable	51657
1092	-0.780591	9.94097	-3.60877	0.00110826	0.0237717	-0.985638	213800_at	CFH	down	3075
1093	-0.578926	6.07975	-3.60815	0.00111009	0.0238015	-0.987174	219884_at	LHX6	down	26468
1094	-0.408745	8.72404	-3.60457	0.00112078	0.0239559	-0.996115	218473_s_at	COLGALT1	stable	79709
1095	-0.70264	7.43526	-3.60457	0.00112079	0.0239559	-0.996122	202082_s_at	SEC14L1	down	6397
1096	-0.427016	4.03903	-3.60369	0.00112343	0.0239926	-0.998311	201340_s_at	ENC1	stable	8507
1097	0.742814	5.41222	3.60356	0.00112382	0.0239926	-0.99864	239093_at	HOGA1	up	112817
1098	0.408127	7.14809	3.60282	0.00112604	0.0240213	-1.00048	212213_x_at	OPA1	stable	4976
1099	0.382883	3.809	3.60118	0.00113101	0.0241103	-1.00458	1569290_s_at	GRIA3	stable	2892
1100	-1.05657	5.71853	-3.59884	0.00113811	0.024204	-1.01041	226301_at	SLC18B1	down	116843
1101	0.447358	4.34915	3.59736	0.00114261	0.024261	-1.01409	1554020_at	BICD1	stable	636
1102	-0.245823	3.87023	-3.5972	0.00114309	0.0242618	-1.01448	227985_at	MACC1-DT	stable	100506098
1103	-0.574897	4.72733	-3.59585	0.00114723	0.0243308	-1.01786	218883_s_at	CENPU	down	79682
1104	-0.400457	7.34246	-3.59502	0.00114978	0.0243566	-1.01993	224659_at	SELENON	stable	57190
1105	-0.760407	7.08467	-3.59488	0.00115021	0.0243566	-1.02027	225282_at	SMAP2	down	64744
1106	0.609657	10.3956	3.59465	0.00115091	0.0243566	-1.02084	209343_at	EFHD1	up	80303
1107	0.379654	6.06678	3.59458	0.00115112	0.0243566	-1.02101	1553956_at	TMEM237	stable	65062
1108	-0.265988	5.13922	-3.59417	0.00115239	0.0243646	-1.02204	204817_at	ESPL1	stable	9700
1109	-0.56411	6.6958	-3.59286	0.00115643	0.0244217	-1.0253	224991_at	CMIP	down	80790
1110	-0.326295	6.18606	-3.59071	0.0011631	0.0245341	-1.03066	204647_at	HOMER3	stable	9454
1111	1.11991	7.87368	3.59034	0.00116425	0.024544	-1.03158	224049_at	KCNK17	up	89822
1112	0.639378	6.46002	3.58725	0.0011739	0.0246574	-1.03928	223877_at	C1QTNF7	up	114905
1113	-0.298749	6.58642	-3.58633	0.00117679	0.0246895	-1.04156	221552_at	ABHD6	stable	57406
1114	-0.431826	5.74318	-3.58563	0.00117899	0.0247168	-1.04331	206120_at	CD33	stable	945
1115	0.158164	3.41701	3.58535	0.00117989	0.0247261	-1.04402	214204_at	PACRG	stable	135138
1116	-0.182357	3.30865	-3.58497	0.00118108	0.0247322	-1.04496	209642_at	BUB1	stable	699
1117	-0.376101	4.58625	-3.58468	0.001182	0.0247419	-1.04568	210031_at	CD247	stable	919
1118	0.492116	9.9769	3.58418	0.00118358	0.024756	-1.04693	227279_at	TCEAL3	stable	85012
1119	-0.343507	8.28797	-3.58311	0.00118698	0.0248176	-1.0496	202592_at	BLOC1S1	stable	2647
1120	0.70032	7.7724	3.58217	0.00118994	0.02487	-1.05192	221935_s_at	EOGT	up	285203
1121	-0.327808	11.5013	-3.57997	0.00119696	0.0249785	-1.0574	200823_x_at	RPL29	stable	6159
1122	-0.846527	11.4501	-3.57933	0.001199	0.025002	-1.05899	217767_at	C3	down	718
1123	0.346111	9.09245	3.57824	0.00120249	0.0250557	-1.0617	205417_s_at	DAG1	stable	1605
1124	0.319981	6.54366	3.57644	0.00120831	0.0251233	-1.06619	218906_x_at	KLC2	stable	64837
1125	-0.594391	4.99223	-3.57373	0.00121706	0.0252438	-1.07292	206470_at	PLXNC1	down	10154
1126	-0.659594	4.52455	-3.57152	0.00122425	0.0253642	-1.07841	227860_at	CPXM1	down	56265
1127	-0.700567	9.68764	-3.57119	0.00122534	0.0253696	-1.07923	202465_at	PCOLCE	down	5118
1128	-0.612954	10.0963	-3.57116	0.00122544	0.0253696	-1.07931	202450_s_at	CTSK	down	1513
1129	0.201339	12.9408	3.57	0.00122925	0.0254131	-1.0822	208980_s_at	UBC	stable	7316
1130	-0.308798	11.9702	-3.56986	0.0012297	0.0254131	-1.08254	208812_x_at	HLA-C	stable	3107
1131	-0.645221	7.38761	-3.56947	0.00123098	0.0254265	-1.08351	227779_at	ECSCR	down	641700
1132	0.473824	5.26587	3.56515	0.00124526	0.0256904	-1.09425	1559388_a_at	LYNX1	stable	66004
1133	0.358318	5.84888	3.56503	0.00124564	0.0256904	-1.09454	209221_s_at	OSBPL2	stable	9885
1134	-0.422981	5.112	-3.56356	0.00125055	0.0257722	-1.0982	1559034_at	SIRPB2	stable	284759
1135	0.407418	5.59251	3.56338	0.00125113	0.0257745	-1.09863	1555334_s_at	SLC30A5	stable	64924
1136	-0.310969	4.35243	-3.5625	0.00125407	0.0258156	-1.10082	229625_at	GBP5	stable	115362
1137	0.434745	7.00989	3.56026	0.00126161	0.0259485	-1.1064	219372_at	IFT81	stable	28981
1138	0.901435	10.3188	3.56013	0.00126203	0.0259485	-1.10671	202274_at	ACTG2	up	72
1139	-0.491511	5.77052	-3.55977	0.00126326	0.0259559	-1.10762	230283_at	NEURL2	stable	140825
1140	-0.395527	3.60408	-3.55919	0.0012652	0.0259861	-1.10905	207165_at	HMMR	stable	3161
1141	0.225185	8.99459	3.55542	0.00127797	0.0261599	-1.1184	208030_s_at	ADD1	stable	118
1142	-0.191758	3.2255	-3.55458	0.00128086	0.0262017	-1.1205	206914_at	CRTAM	stable	56253
1143	0.402762	5.84564	3.55328	0.0012853	0.0262804	-1.12372	1554148_a_at	SLC33A1	stable	9197
1144	0.747841	8.83528	3.5523	0.00128864	0.0263225	-1.12614	211276_at	TCEAL2	up	140597
1145	0.931507	6.33598	3.55132	0.00129203	0.026354	-1.12859	238763_at	RBM20	up	282996
1146	-0.3483	8.34006	-3.55045	0.00129502	0.0263609	-1.13074	202040_s_at	KDM5A	stable	5927
1147	-0.26526	7.77038	-3.55045	0.00129502	0.0263609	-1.13074	225403_at	RPP25L	stable	138716
1148	-0.231099	5.19832	-3.54993	0.00129679	0.0263788	-1.13202	219719_at	HIGD1B	stable	51751
1149	-0.6696	5.96545	-3.54991	0.00129687	0.0263788	-1.13207	227474_at	PAX8-AS1	down	654433
1150	-0.684894	7.13359	-3.54957	0.00129805	0.026391	-1.13291	204279_at	PSMB9	down	5698
1151	-0.424549	6.25948	-3.54859	0.00130144	0.0264325	-1.13535	205507_at	ARHGEF15	stable	22899
1152	-0.695874	6.36339	-3.5478	0.00130419	0.026463	-1.13731	204466_s_at	SNCA	down	6622
1153	-0.741789	5.80088	-3.54772	0.00130447	0.026463	-1.13751	206666_at	GZMK	down	3003
1154	0.62007	8.29549	3.54766	0.00130467	0.026463	-1.13765	201481_s_at	PYGB	up	5834
1155	-0.289484	6.80487	-3.54724	0.00130613	0.0264786	-1.13869	219579_at	RAB3IL1	stable	5866
1156	0.3026	5.57241	3.5457	0.00131152	0.0265681	-1.14253	207359_at	CAMKK2	stable	10645
1157	-0.928453	5.78855	-3.54521	0.00131322	0.0265803	-1.14374	207571_x_at	THEMIS2	down	9473
1158	-0.581454	5.39056	-3.54511	0.00131358	0.0265803	-1.14399	227154_at	IGSF21	down	84966
1159	0.570936	6.40853	3.54462	0.0013153	0.0265954	-1.1452	208920_at	SRI	up	6717
1160	1.1802	6.17307	3.54307	0.00132074	0.0266364	-1.14905	1554789_a_at	PDE8B	up	8622
1161	-0.342247	6.70237	-3.54171	0.00132552	0.0267008	-1.15241	209320_at	ADCY3	stable	109
1162	0.265724	7.76462	3.54099	0.00132806	0.026725	-1.15419	219137_s_at	MFF	stable	56947
1163	-1.01444	9.55677	-3.54064	0.00132929	0.0267398	-1.15505	1554452_a_at	HILPDA	down	29923
1164	0.209327	3.74439	3.5405	0.0013298	0.0267403	-1.15541	1554677_s_at	CMTM4	stable	146223
1165	0.714149	10.5014	3.53966	0.00133276	0.0267899	-1.15748	227006_at	PPP1R14A	up	94274
1166	-0.269511	8.84903	-3.53884	0.00133568	0.0268191	-1.15952	218088_s_at	RRAGC	stable	64121
1167	0.479259	9.65018	3.5355	0.0013476	0.0270207	-1.16779	204235_s_at	GULP1	stable	51454
1168	-0.221663	12.3283	-3.53442	0.00135149	0.0270656	-1.17047	201033_x_at	RPLP0	stable	6175
1169	0.333014	7.9159	3.5344	0.00135153	0.0270656	-1.1705	214703_s_at	MAN2B2	stable	23324
1170	0.70368	7.2773	3.53425	0.00135209	0.0270656	-1.17088	204671_s_at	ANKRD6	up	22881
1171	0.28975	8.22046	3.53416	0.00135242	0.0270656	-1.17111	205273_s_at	PITRM1	stable	10531
1172	0.441049	7.96103	3.53358	0.0013545	0.0270876	-1.17254	1554678_s_at	HNRNPDL	stable	9987
1173	0.299498	11.5268	3.53199	0.00136026	0.0271928	-1.17649	201667_at	GJA1	stable	2697
1174	0.358337	6.54335	3.53174	0.00136115	0.0271992	-1.1771	219297_at	WDR44	stable	54521
1175	-0.735619	5.41811	-3.53133	0.00136262	0.0272102	-1.1781	1555638_a_at	SAMSN1	down	64092
1176	-0.253891	8.67366	-3.53086	0.00136434	0.0272245	-1.17928	218606_at	ZDHHC7	stable	55625
1177	-0.380295	6.5715	-3.52901	0.00137108	0.0273292	-1.18386	202847_at	PCK2	stable	5106
1178	0.276949	7.77204	3.52873	0.00137209	0.0273393	-1.18455	212785_s_at	LARP7	stable	51574
1179	0.486309	6.9266	3.52845	0.00137311	0.0273497	-1.18524	1554691_a_at	PACSIN2	stable	11252
1180	-0.602262	6.05775	-3.52667	0.00137962	0.0274494	-1.18964	219284_at	HSPBAP1	down	79663
1181	0.327087	7.98915	3.52608	0.00138178	0.0274822	-1.19109	203335_at	PHYH	stable	5264
1182	-0.899479	4.65584	-3.52419	0.00138874	0.0275805	-1.19577	207038_at	SLC16A6	down	9120
1183	0.264229	8.85722	3.52405	0.00138926	0.027581	-1.19612	218042_at	COPS4	stable	51138
1184	-0.467149	11.5742	-3.52368	0.00139064	0.0275982	-1.19704	208729_x_at	HLA-B	stable	3106
1185	-0.331995	6.76463	-3.52251	0.00139497	0.027654	-1.19993	202645_s_at	MEN1	stable	4221
1186	-0.454526	5.9527	-3.52224	0.00139595	0.0276635	-1.20059	204401_at	KCNN4	stable	3783
1187	-0.261096	6.853	-3.52138	0.00139915	0.0276767	-1.20272	203010_at	STAT5A	stable	6776
1188	-0.437534	11.9488	-3.51481	0.00142381	0.0281136	-1.21897	200092_s_at	RPL37	stable	6167
1189	0.468398	7.74759	3.5145	0.00142497	0.0281264	-1.21973	215440_s_at	BEX4	stable	56271
1190	-0.71062	5.54116	-3.51177	0.00143535	0.0282599	-1.22648	206011_at	CASP1	down	834
1191	0.14153	3.85617	3.51106	0.00143807	0.028293	-1.22824	207528_s_at	SLC7A11	stable	23657
1192	-0.362309	7.16033	-3.50949	0.00144406	0.0283803	-1.23211	205423_at	AP1B1	stable	162
1193	0.324992	3.77369	3.50811	0.00144937	0.0284744	-1.23552	204953_at	SNAP91	stable	9892
1194	0.323814	13.0999	3.5069	0.001454	0.028545	-1.23849	200795_at	SPARCL1	stable	8404
1195	0.14133	3.46852	3.50625	0.00145653	0.0285843	-1.2401	244758_at	ZBED9	stable	114821
1196	0.287281	7.12185	3.50418	0.00146454	0.0287003	-1.2452	208950_s_at	ALDH7A1	stable	501
1197	0.25215	6.84507	3.50367	0.00146653	0.0287084	-1.24646	202129_s_at	RIOK3	stable	8780
1198	-0.297444	3.85838	-3.50341	0.00146753	0.0287177	-1.2471	218806_s_at	VAV3	stable	10451
1199	-0.348048	5.90884	-3.50287	0.00146966	0.0287389	-1.24845	226575_at	ZNF462	stable	58499
1200	-0.596015	6.42135	-3.50076	0.00147792	0.0288626	-1.25366	228158_at	LSP1P5	down	645166
1201	-0.330727	6.38988	-3.49688	0.00149319	0.0290741	-1.26322	206335_at	GALNS	stable	2588
1202	-0.533794	5.98542	-3.49658	0.00149438	0.029087	-1.26396	209670_at	TRAC	down	28755
1203	-0.332947	6.20509	-3.49517	0.00149999	0.0291754	-1.26744	219480_at	SNAI1	stable	6615
1204	0.204782	7.79018	3.49468	0.00150193	0.0292026	-1.26864	217908_s_at	DCAF6	stable	55827
1205	0.158859	4.5923	3.49437	0.00150314	0.0292159	-1.26939	1556377_s_at	LMO7	stable	4008
1206	0.288618	5.79175	3.49318	0.0015079	0.0292876	-1.27233	1566110_at	PIEZO1	stable	9780
1207	0.256555	3.65525	3.49289	0.00150907	0.0292894	-1.27305	213424_at	KIAA0895	stable	23366
1208	-0.255091	4.34654	-3.49271	0.0015098	0.0292933	-1.2735	227189_at	CPNE5	stable	57699
1209	-0.25949	5.4605	-3.49236	0.00151119	0.0293097	-1.27435	205975_s_at	HOXD1	stable	3231
1210	0.251979	4.98853	3.49094	0.00151689	0.0293995	-1.27786	1555487_a_at	ACTR3B	stable	57180
1211	-0.307022	7.72237	-3.49078	0.00151755	0.0294018	-1.27826	223120_at	FUCA2	stable	2519
1212	-0.292887	4.40305	-3.49062	0.00151818	0.0294036	-1.27865	206244_at	CR1	stable	1378
1213	-0.786052	7.91773	-3.49021	0.00151984	0.029412	-1.27966	206049_at	SELP	down	6403
1214	-1.7135	6.76529	-3.48997	0.00152082	0.029412	-1.28026	202988_s_at	RGS1	down	5996
1215	-0.313183	6.02934	-3.48977	0.00152159	0.029412	-1.28073	218282_at	EDEM2	stable	55741
1216	0.401929	8.57612	3.48971	0.00152184	0.029412	-1.28089	201120_s_at	PGRMC1	stable	10857
1217	0.308152	6.56531	3.48951	0.00152267	0.0294176	-1.28139	204421_s_at	FGF2	stable	2247
1218	-0.388174	5.49393	-3.4893	0.00152349	0.0294231	-1.28189	205639_at	AOAH	stable	313
1219	0.529247	4.36821	3.48785	0.00152937	0.0295262	-1.28547	1554878_a_at	ABCD3	up	5825
1220	0.328508	6.96488	3.48677	0.00153374	0.0295897	-1.28812	221781_s_at	DNAJC10	stable	54431
1221	-0.164525	3.57498	-3.48553	0.00153878	0.0296701	-1.29118	206364_at	KIF14	stable	9928
1222	-0.554114	4.50482	-3.48548	0.00153899	0.0296701	-1.2913	207850_at	CXCL3	down	2921
1223	0.335208	6.22231	3.48178	0.00155416	0.0298678	-1.30042	203597_s_at	WBP4	stable	11193
1224	-0.297714	6.38332	-3.48144	0.00155554	0.0298733	-1.30124	218498_s_at	ERO1A	stable	30001
1225	-0.339137	8.25905	-3.47994	0.00156174	0.0299347	-1.30494	227139_s_at	HPS3	stable	84343
1226	-0.381784	6.25769	-3.47987	0.00156203	0.0299347	-1.30511	204487_s_at	KCNQ1	stable	3784
1227	0.282375	3.60849	3.47968	0.00156283	0.0299397	-1.30559	1553533_at	JPH1	stable	56704
1228	0.261708	7.05501	3.47889	0.00156608	0.0299914	-1.30752	218016_s_at	POLR3E	stable	55718
1229	-0.45852	11.8062	-3.4787	0.00156689	0.0299964	-1.308	1556499_s_at	COL1A1	stable	1277
1230	-0.392667	9.35221	-3.47706	0.0015737	0.0301057	-1.31203	201338_x_at	GTF3A	stable	2971
1231	-0.315857	8.2005	-3.47663	0.00157549	0.0301293	-1.31308	202424_at	MAP2K2	stable	5605
1232	-0.231322	4.02988	-3.47647	0.00157617	0.0301318	-1.31348	205339_at	STIL	stable	6491
1233	0.390405	8.26153	3.47581	0.0015789	0.0301735	-1.31509	209781_s_at	KHDRBS3	stable	10656
1234	-0.276156	9.817	-3.47526	0.00158123	0.0301969	-1.31646	210501_x_at	EIF3K	stable	27335
1235	0.355355	6.25263	3.47452	0.0015843	0.030245	-1.31827	220230_s_at	CYB5R2	stable	51700
1236	-0.272211	4.5112	-3.47393	0.0015868	0.0302722	-1.31973	218693_at	TSPAN15	stable	23555
1237	0.399105	5.34533	3.47392	0.00158683	0.0302722	-1.31975	1564308_a_at	MPP7	stable	143098
1238	-0.402646	7.43333	-3.47348	0.0015887	0.0302915	-1.32084	203127_s_at	SPTLC2	stable	9517
1239	-0.202934	10.0177	-3.47342	0.00158895	0.0302915	-1.32099	208737_at	ATP6V1G1	stable	9550
1240	-0.394791	6.72694	-3.47285	0.00159133	0.0303025	-1.32238	226056_at	ARHGAP31	stable	57514
1241	0.623806	6.75141	3.47275	0.00159175	0.0303025	-1.32262	226338_at	PIP4P2	up	55529
1242	-0.398461	4.42666	-3.47275	0.00159175	0.0303025	-1.32262	224428_s_at	CDCA7	stable	83879
1243	0.628941	4.54344	3.47143	0.00159733	0.030377	-1.32588	1553859_at	TPH1	up	7166
1244	-0.326875	8.76848	-3.47113	0.00159862	0.0303865	-1.32662	204386_s_at	MRPL57	stable	78988
1245	0.364677	7.45656	3.46982	0.00160414	0.0304186	-1.32983	205672_at	XPA	stable	7507
1246	0.250413	3.1901	3.4693	0.00160637	0.0304326	-1.33112	1558522_at	PALS2	stable	51678
1247	0.472934	5.44404	3.46784	0.00161259	0.0305186	-1.33471	207620_s_at	CASK	stable	8573
1248	0.687199	5.32772	3.46591	0.00162081	0.0306318	-1.33944	209493_at	PDZD2	up	23037
1249	-0.287823	3.89571	-3.46549	0.00162264	0.0306452	-1.34048	203418_at	CCNA2	stable	890
1250	-0.318475	4.326	-3.464	0.00162902	0.0307445	-1.34413	207075_at	NLRP3	stable	114548
1251	0.372079	5.95854	3.4633	0.00163205	0.0307803	-1.34585	209577_at	PCYT2	stable	5833
1252	-0.175814	7.04961	-3.46264	0.00163492	0.0308132	-1.34748	217929_s_at	KIAA0319L	stable	79932
1253	0.722269	7.09487	3.4607	0.00164331	0.03095	-1.35224	213110_s_at	COL4A5	up	1287
1254	-0.268846	4.12079	-3.45864	0.00165227	0.0310676	-1.35729	205101_at	CIITA	stable	4261
1255	-0.489056	6.73631	-3.45844	0.00165317	0.0310676	-1.3578	214180_at	MAN1C1	stable	57134
1256	0.344747	6.96306	3.45836	0.00165349	0.0310676	-1.35798	218013_x_at	DCTN4	stable	51164
1257	0.271041	4.41877	3.45801	0.00165502	0.0310676	-1.35883	208460_at	GJC1	stable	10052
1258	-0.190244	3.46454	-3.45687	0.00166002	0.0311147	-1.36164	1557197_a_at	LGALS3	stable	3958
1259	-0.321689	6.93199	-3.45632	0.00166242	0.0311396	-1.36298	204929_s_at	VAMP5	stable	10791
1260	0.281611	8.53995	3.45526	0.00166711	0.0312048	-1.36559	201518_at	CBX1	stable	10951
1261	-0.93766	7.68234	-3.45429	0.00167137	0.0312663	-1.36796	219436_s_at	EMCN	down	51705
1262	-0.401765	7.52622	-3.45387	0.00167326	0.0312663	-1.36901	204173_at	MYL6B	stable	140465
1263	-0.236358	8.04467	-3.4495	0.00169265	0.0315531	-1.37971	219590_x_at	DPH5	stable	51611
1264	0.611997	6.66235	3.44751	0.0017016	0.0316363	-1.38461	232235_at	DSEL	up	92126
1265	-0.309808	4.98074	-3.44748	0.00170174	0.0316363	-1.38468	205400_at	WAS	stable	7454
1266	-0.467433	7.14556	-3.44603	0.00170824	0.0317248	-1.38822	218950_at	ARAP3	stable	64411
1267	-1.37779	8.35968	-3.44536	0.00171126	0.0317487	-1.38987	204438_at	MRC1	down	4360
1268	0.418075	6.82457	3.44505	0.00171265	0.0317636	-1.39062	1565681_s_at	DIP2C	stable	22982
1269	0.663992	5.03819	3.44396	0.00171761	0.0318232	-1.3933	238165_at	PDZRN3-AS1	up	101927249
1270	-0.261941	7.96912	-3.44238	0.00172477	0.0319234	-1.39716	201953_at	CIB1	stable	10519
1271	0.352431	6.13409	3.44133	0.00172956	0.0320012	-1.39974	224506_s_at	PLPP7	stable	84814
1272	0.243882	8.18839	3.44018	0.00173482	0.0320769	-1.40256	221641_s_at	ACOT9	stable	23597
1273	-0.239993	12.6941	-3.43989	0.00173613	0.0320902	-1.40326	200062_s_at	RPL30	stable	6156
1274	-0.376452	6.794	-3.43908	0.00173987	0.0321485	-1.40526	220213_at	TSHZ2	stable	128553
1275	0.293454	7.44436	3.43636	0.00175238	0.032325	-1.41191	218616_at	INTS12	stable	57117
1276	-0.241172	6.45554	-3.43486	0.00175936	0.0324429	-1.4156	221582_at	H2AW	stable	92815
1277	-0.23379	3.2602	-3.43468	0.00176017	0.0324468	-1.41602	222848_at	CENPK	stable	64105
1278	0.334928	5.87471	3.43423	0.00176225	0.0324634	-1.41712	211952_at	IPO5	stable	3843
1279	0.46355	4.02815	3.43353	0.0017655	0.0325097	-1.41883	237116_at	LOC646903	stable	646903
1280	0.338427	7.16245	3.43322	0.00176696	0.0325097	-1.4196	218877_s_at	TRMT11	stable	60487
1281	0.245695	4.50116	3.4309	0.00177782	0.0326001	-1.42529	1557192_at	COX10-DT	stable	100874058
1282	-0.621827	4.13252	-3.43024	0.00178088	0.0326307	-1.42688	207387_s_at	GK	down	2710
1283	-0.39533	6.26339	-3.43024	0.00178089	0.0326307	-1.42688	220430_at	FAM110D	stable	79927
1284	0.444496	5.71225	3.42844	0.00178939	0.0327646	-1.43131	219880_at	CTC-338M12.4	stable	101928649
1285	-0.778485	7.31904	-3.42799	0.00179151	0.0327809	-1.4324	204677_at	CDH5	down	1003
1286	-0.241819	4.82259	-3.42787	0.00179208	0.0327809	-1.4327	206185_at	CRYBB1	stable	1414
1287	0.321192	7.35314	3.42718	0.00179534	0.0328295	-1.43438	203035_s_at	PIAS3	stable	10401
1288	-0.223687	3.31945	-3.42668	0.00179768	0.0328613	-1.43559	1561365_at	NRP1	stable	8829
1289	-0.39789	8.29241	-3.42642	0.00179894	0.0328733	-1.43624	226748_at	LYSMD2	stable	256586
1290	0.358137	5.14608	3.42215	0.0018193	0.0331554	-1.44668	228448_at	MAP6	stable	4135
1291	-0.437337	6.73354	-3.42074	0.00182605	0.0332244	-1.45012	208436_s_at	IRF7	stable	3665
1292	-0.842368	9.57816	-3.42043	0.00182755	0.0332393	-1.45089	201860_s_at	PLAT	down	5327
1293	-0.603074	6.18117	-3.41929	0.00183304	0.0332852	-1.45367	202531_at	IRF1	down	3659
1294	0.291468	5.47121	3.41762	0.00184113	0.0334068	-1.45775	223219_s_at	CNOT10	stable	25904
1295	-1.34379	7.52021	-3.41753	0.00184157	0.0334068	-1.45798	220088_at	C5AR1	down	728
1296	0.39344	7.61709	3.41652	0.00184643	0.0334727	-1.46042	201035_s_at	HADH	stable	3033
1297	0.407079	7.4661	3.4153	0.00185237	0.0335581	-1.4634	213701_at	C12orf29	stable	91298
1298	0.299871	10.3045	3.41483	0.00185471	0.0335782	-1.46457	208847_s_at	ADH5	stable	128
1299	-0.172977	3.64609	-3.41395	0.001859	0.0336448	-1.46671	205553_s_at	CSRP3	stable	8048
1300	0.860828	7.12668	3.4114	0.00187149	0.0338037	-1.47293	209645_s_at	ALDH1B1	up	219
1301	0.358503	5.9641	3.41081	0.00187443	0.0338258	-1.47438	224461_s_at	AIFM2	stable	84883
1302	0.292411	4.9943	3.41024	0.00187725	0.0338487	-1.47577	1555105_a_at	MIER1	stable	57708
1303	0.315204	13.3009	3.40975	0.00187963	0.0338724	-1.47695	1555724_s_at	TAGLN	stable	6876
1304	-0.319618	9.78203	-3.40883	0.00188418	0.0339432	-1.47919	200814_at	PSME1	stable	5720
1305	0.310496	4.78069	3.40774	0.00188963	0.0340013	-1.48187	227992_s_at	SPACA6	stable	147650
1306	0.242209	4.5479	3.40768	0.0018899	0.0340013	-1.482	221308_at	FRS2	stable	10818
1307	0.618539	5.14372	3.40611	0.00189774	0.03412	-1.48584	220273_at	IL17B	up	27190
1308	0.574693	7.04332	3.40584	0.00189909	0.0341209	-1.4865	212731_at	ANKRD46	up	157567
1309	0.405671	4.60665	3.40416	0.00190748	0.0342388	-1.49059	210015_s_at	MAP2	stable	4133
1310	0.477365	6.83646	3.40316	0.00191253	0.0342845	-1.49304	204321_at	NEO1	stable	4756
1311	0.392088	4.02018	3.40244	0.00191613	0.0343152	-1.49479	222121_at	ARHGEF26	stable	26084
1312	0.256642	4.57464	3.40188	0.00191898	0.0343438	-1.49616	1563983_at	TPT1-AS1	stable	100190939
1313	-0.333849	7.21358	-3.40074	0.00192473	0.0344129	-1.49894	202279_at	ATP5MJ	stable	9556
1314	-0.35496	7.6663	-3.39978	0.00192958	0.0344545	-1.50127	218632_at	HECTD3	stable	79654
1315	-0.487367	6.82574	-3.39754	0.00194098	0.034591	-1.50673	214438_at	HLX	stable	3142
1316	-0.4121	5.34749	-3.39551	0.00195136	0.0347187	-1.51168	214084_x_at	NCF1	stable	653361
1317	0.517164	4.81718	3.39467	0.00195569	0.0347731	-1.51373	235562_at	C3orf70	up	285382
1318	-0.647652	6.33507	-3.39359	0.00196122	0.0348416	-1.51635	221286_s_at	MZB1	down	51237
1319	0.421285	6.9211	3.39301	0.00196424	0.0348794	-1.51778	218395_at	ACTR6	stable	64431
1320	0.308941	7.32463	3.3922	0.00196841	0.0349198	-1.51974	224280_s_at	MTFR1L	stable	56181
1321	0.242176	6.62087	3.3913	0.00197306	0.0349796	-1.52193	218122_s_at	SENP2	stable	59343
1322	0.723976	8.26537	3.38815	0.00198947	0.0351792	-1.52961	209663_s_at	ITGA7	up	3679
1323	-0.216984	3.35201	-3.38671	0.00199697	0.0352321	-1.5331	214716_at	BMP2K	stable	55589
1324	-1.05209	5.71067	-3.38559	0.0020029	0.0353139	-1.53584	230081_at	PLCXD3	down	345557
1325	0.249739	6.35568	3.38485	0.00200675	0.0353705	-1.53762	225635_s_at	EBLN3P	stable	100506710
1326	0.232713	6.78472	3.38409	0.00201075	0.0354181	-1.53947	217896_s_at	PSME3IP1	stable	80011
1327	-1.47806	6.68744	-3.38158	0.00202404	0.0356063	-1.54557	211798_x_at	IGLJ3	down	28831
1328	0.616783	6.2968	3.38112	0.00202649	0.0356379	-1.54669	202708_s_at	H2BC21	up	8349
1329	0.323955	5.07528	3.37965	0.00203434	0.035753	-1.55028	230458_at	SLC45A1	stable	50651
1330	-0.395929	7.79187	-3.37953	0.00203499	0.035753	-1.55058	202679_at	NPC1	stable	4864
1331	-0.207931	4.07267	-3.37505	0.00205902	0.0360708	-1.56145	209464_at	AURKB	stable	9212
1332	0.262956	4.29474	3.37257	0.00207247	0.0362483	-1.56748	1555256_at	EVC2	stable	132884
1333	-0.60182	7.84612	-3.37148	0.00207842	0.0363145	-1.57014	219213_at	JAM2	down	58494
1334	-0.742131	6.92024	-3.37139	0.00207891	0.0363145	-1.57036	218966_at	MYO5C	down	55930
1335	-0.395186	6.15158	-3.36962	0.00208856	0.0364481	-1.57465	218676_s_at	PCTP	stable	58488
1336	0.491876	5.3737	3.36888	0.00209259	0.0364486	-1.57643	223634_at	RASD2	stable	23551
1337	0.257148	6.3754	3.36847	0.00209487	0.0364719	-1.57744	208459_s_at	XPO7	stable	23039
1338	0.360178	3.86801	3.3684	0.00209525	0.0364719	-1.57761	1557167_at	HCG11	stable	493812
1339	-0.266608	5.32573	-3.36485	0.00211481	0.0367771	-1.58622	220160_s_at	KPTN	stable	11133
1340	0.495371	6.62208	3.36142	0.00213389	0.0370618	-1.59454	210751_s_at	RGN	stable	9104
1341	0.613453	5.04713	3.36069	0.00213798	0.0371211	-1.59631	229407_at	SDK1	up	221935
1342	0.334814	7.90019	3.35793	0.00215353	0.0373673	-1.60302	1554167_a_at	GOLGA7	stable	51125
1343	-0.936663	4.54114	-3.35585	0.00216527	0.0375536	-1.60806	207655_s_at	BLNK	down	29760
1344	-0.227019	10.8987	-3.35573	0.00216594	0.0375536	-1.60834	217756_x_at	SERF2	stable	10169
1345	-0.686721	5.92224	-3.35521	0.0021689	0.0375835	-1.60961	227295_at	IKBIP	down	121457
1346	0.648522	9.29451	3.35483	0.00217107	0.0375835	-1.61053	228176_at	S1PR3	up	1903
1347	0.375486	8.50895	3.35441	0.00217345	0.0375835	-1.61155	212914_at	CBX7	stable	23492
1348	-0.243198	7.95824	-3.35331	0.00217972	0.0376544	-1.61421	202292_x_at	LYPLA2	stable	11313
1349	-0.91908	8.53381	-3.35319	0.00218042	0.0376546	-1.61451	225241_at	CCDC80	down	151887
1350	0.34967	3.57219	3.35094	0.00219329	0.0378649	-1.61996	224484_s_at	BRMS1L	stable	84312
1351	0.326813	7.63332	3.34969	0.00220048	0.037977	-1.62299	1554806_a_at	FBXO8	stable	26269
1352	0.406856	7.41558	3.34732	0.00221412	0.0381626	-1.62871	1557961_s_at	C8orf88	stable	100127983
1353	0.236034	7.50816	3.34712	0.00221528	0.0381626	-1.6292	202811_at	STAMBP	stable	10617
1354	0.338436	7.59959	3.34698	0.00221612	0.0381626	-1.62955	223005_s_at	TMEM245	stable	23731
1355	-0.252551	7.11638	-3.3463	0.00222005	0.0382063	-1.63119	209650_s_at	TBC1D22A	stable	25771
1356	-0.302728	6.36905	-3.34091	0.00225154	0.0386947	-1.64422	211121_s_at	DOK1	stable	1796
1357	-0.53678	3.71406	-3.33919	0.00226169	0.0388006	-1.64839	206693_at	IL7	down	3574
1358	0.473659	8.29274	3.33869	0.00226463	0.0388268	-1.64959	204099_at	SMARCD3	stable	6604
1359	0.269522	10.5486	3.33835	0.00226667	0.0388495	-1.65042	217783_s_at	YPEL5	stable	51646
1360	-0.402005	7.58729	-3.33691	0.00227519	0.0389539	-1.6539	205405_at	SEMA5A	stable	9037
1361	-0.546416	7.59956	-3.33545	0.00228392	0.0390675	-1.65744	204683_at	ICAM2	down	3384
1362	-0.735739	5.57176	-3.33412	0.00229187	0.0391709	-1.66065	229510_at	MS4A14	down	84689
1363	-1.23779	6.2301	-3.33335	0.00229644	0.0392246	-1.6625	206638_at	HTR2B	down	3357
1364	0.342661	4.56312	3.3331	0.002298	0.0392389	-1.66313	1555202_a_at	RPRD1A	stable	55197
1365	-0.830559	8.3617	-3.33293	0.00229901	0.0392421	-1.66353	219134_at	ADGRL4	down	64123
1366	0.232271	8.43409	3.33251	0.00230149	0.039255	-1.66453	202224_at	CRK	stable	1398
1367	0.348683	6.57927	3.33224	0.00230316	0.039255	-1.6652	213943_at	TWIST1	stable	7291
1368	0.590399	9.22205	3.33076	0.00231205	0.0393804	-1.66877	208096_s_at	COL21A1	up	81578
1369	0.473305	9.69307	3.32874	0.00232426	0.0395072	-1.67364	225381_at	MIR100HG	stable	399959
1370	-0.623941	5.47624	-3.32874	0.00232426	0.0395072	-1.67364	221601_s_at	FCMR	down	9214
1371	0.746658	11.1623	3.3287	0.00232455	0.0395072	-1.67376	203766_s_at	LMOD1	up	25802
1372	-0.483149	10.2107	-3.32826	0.00232721	0.0395402	-1.67481	219762_s_at	RPL36	stable	25873
1373	-0.258666	7.90395	-3.32782	0.00232987	0.039573	-1.67587	225156_at	ELOF1	stable	84337
1374	0.404079	5.94258	3.3273	0.00233302	0.0396143	-1.67712	209576_at	GNAI1	stable	2770
1375	-0.575061	7.94454	-3.32522	0.00234576	0.0398058	-1.68216	223773_s_at	SNHG12	down	85028
1376	-0.371306	7.45465	-3.32454	0.00234992	0.0398392	-1.6838	218027_at	MRPL15	stable	29088
1377	0.756565	5.5324	3.32156	0.00236822	0.0400994	-1.69097	224367_at	BEX2	up	84707
1378	0.42022	9.19588	3.32125	0.00237016	0.0401078	-1.69173	201968_s_at	PGM1	stable	5236
1379	0.255828	5.66827	3.31952	0.00238088	0.0402518	-1.6959	213363_at	CA5BP1	stable	340591
1380	-0.431983	9.59298	-3.31924	0.00238265	0.0402693	-1.69659	1555419_a_at	ASAH1	stable	427
1381	-0.334277	11.8911	-3.3189	0.00238474	0.0402922	-1.6974	213932_x_at	HLA-A	stable	3105
1382	0.154311	3.47457	3.31841	0.00238777	0.0403219	-1.69858	1559313_at	ANKRD18A	stable	253650
1383	-1.45668	8.47633	-3.31826	0.00238871	0.0403219	-1.69894	218002_s_at	CXCL14	down	9547
1384	-0.702599	11.0874	-3.31766	0.00239243	0.0403723	-1.70038	201427_s_at	SELENOP	down	6414
1385	0.756424	10.3476	3.31596	0.0024031	0.0404697	-1.7045	214954_at	SUSD5	up	26032
1386	0.417721	7.84894	3.31591	0.00240339	0.0404697	-1.70461	217781_s_at	ZNF106	stable	64397
1387	-0.274724	6.26167	-3.31536	0.00240687	0.0404811	-1.70595	223222_at	SLC25A19	stable	60386
1388	0.289577	8.93273	3.31444	0.00241265	0.0405574	-1.70817	205158_at	RNASE4	stable	6038
1389	-0.386105	4.00493	-3.31419	0.00241422	0.0405579	-1.70877	205476_at	CCL20	stable	6364
1390	-0.325259	5.50831	-3.31284	0.00242271	0.0406699	-1.71202	205266_at	LIF	stable	3976
1391	-0.352258	7.25067	-3.31132	0.00243232	0.0407239	-1.71567	202307_s_at	TAP1	stable	6890
1392	0.674336	5.58846	3.31127	0.00243263	0.0407239	-1.71579	1564053_a_at	YTHDF3	up	253943
1393	0.352228	6.9912	3.31065	0.00243655	0.0407644	-1.71728	209818_s_at	HABP4	stable	22927
1394	-0.381756	7.4444	-3.31054	0.0024373	0.0407645	-1.71756	208926_at	NEU1	stable	4758
1395	0.711712	4.73233	3.30971	0.00244258	0.0408278	-1.71957	229302_at	TMEM178A	up	130733
1396	-0.206508	7.29613	-3.30734	0.00245766	0.0409672	-1.72526	200739_s_at	SUMO3	stable	6612
1397	0.546777	10.0108	3.30719	0.00245861	0.0409706	-1.72561	209655_s_at	TMEM47	up	83604
1398	-0.270194	6.22572	-3.30677	0.0024613	0.041003	-1.72663	228410_at	GAB3	stable	139716
1399	-0.875097	5.55416	-3.30646	0.00246334	0.041012	-1.72739	227742_at	CLIC6	down	54102
1400	0.396703	4.6285	3.30586	0.00246715	0.0410628	-1.72882	1552627_a_at	ARHGAP5	stable	394
1401	0.301922	11.6615	3.30334	0.00248344	0.0412837	-1.73491	201994_at	MORF4L2	stable	9643
1402	0.258535	9.37846	3.30279	0.00248695	0.0413295	-1.73621	224690_at	FAM210B	stable	116151
1403	-0.187628	3.13249	-3.30197	0.0024923	0.0413594	-1.7382	219263_at	RNF128	stable	79589
1404	-0.801387	7.15629	-3.30112	0.00249779	0.0414341	-1.74023	213056_at	FRMD4B	down	23150
1405	-0.34039	6.99097	-3.30047	0.00250206	0.0414672	-1.74181	1558685_a_at	CH17-340M24.3	stable	158960
1406	-0.373144	4.76765	-3.29925	0.00250997	0.0415856	-1.74473	1553043_a_at	CD300LF	stable	146722
1407	0.265397	4.26913	3.29886	0.00251257	0.0415986	-1.74568	229364_at	PRDX6-AS1	stable	101928673
1408	0.512207	5.729	3.29835	0.00251587	0.041625	-1.7469	220340_at	GREB1L	up	80000
1409	0.42739	7.18869	3.29813	0.00251733	0.041625	-1.74743	230254_at	CALHM5	stable	254228
1410	-0.205267	3.36834	-3.29791	0.00251873	0.0416277	-1.74795	219148_at	PBK	stable	55872
1411	-0.392411	6.98137	-3.29733	0.00252254	0.0416425	-1.74935	206829_x_at	ZNF430	stable	80264
1412	-1.20507	5.92765	-3.29647	0.00252822	0.0416984	-1.75142	215214_at	IGLV3-25	down	28793
1413	0.474835	7.87186	3.29508	0.00253742	0.0418028	-1.75478	218930_s_at	TMEM106B	stable	54664
1414	-0.501874	7.9794	-3.29505	0.00253761	0.0418028	-1.75485	227419_x_at	PLAC9	down	219348
1415	0.635095	10.9008	3.2922	0.00255644	0.0419993	-1.76168	218730_s_at	OGN	up	4969
1416	0.361559	6.56898	3.29035	0.00256882	0.042152	-1.76615	203829_at	ELP4	stable	26610
1417	-0.414128	6.8041	-3.28747	0.00258812	0.0424177	-1.77306	209310_s_at	CASP4	stable	837
1418	0.690645	8.13205	3.28647	0.00259484	0.0424717	-1.77546	203865_s_at	ADARB1	up	104
1419	0.261442	9.41151	3.28629	0.00259608	0.0424717	-1.7759	212345_s_at	CREB3L2	stable	64764
1420	-0.223559	4.71843	-3.28568	0.00260017	0.0425132	-1.77735	232227_at	HSPC324	stable	101928612
1421	-0.794654	6.55944	-3.28525	0.0026031	0.0425275	-1.77839	226992_at	NOSTRIN	down	115677
1422	0.533241	8.41064	3.28475	0.00260646	0.0425634	-1.77959	204442_x_at	LTBP4	up	8425
1423	0.379559	6.17125	3.28447	0.00260837	0.0425634	-1.78026	204428_s_at	LCAT	stable	3931
1424	0.551085	8.7018	3.28421	0.00261014	0.0425634	-1.78089	225732_at	KLHL42	up	57542
1425	-0.483017	5.29876	-3.2831	0.00261764	0.0426249	-1.78354	226264_at	SUSD1	stable	64420
1426	0.367244	7.46574	3.2831	0.00261766	0.0426249	-1.78355	225949_at	NRBP2	stable	340371
1427	-0.221447	12.3735	-3.28306	0.00261792	0.0426249	-1.78364	200003_s_at	RPL28	stable	6158
1428	0.911957	8.54592	3.28292	0.00261891	0.0426284	-1.78399	204916_at	RAMP1	up	10267
1429	-0.66568	7.09619	-3.28227	0.00262329	0.0426871	-1.78554	206331_at	CALCRL	down	10203
1430	0.368317	7.12086	3.28152	0.00262846	0.0427584	-1.78735	203356_at	CAPN7	stable	23473
1431	0.234102	4.13161	3.27903	0.0026455	0.042959	-1.79332	220783_at	MMP27	stable	64066
1432	0.29085	11.7702	3.27789	0.00265336	0.0430104	-1.79606	208655_at	CCNI	stable	10983
1433	-0.215324	5.69572	-3.27765	0.00265502	0.0430114	-1.79664	218951_s_at	PLCXD1	stable	55344
1434	-0.476747	4.40736	-3.27764	0.00265503	0.0430114	-1.79664	207610_s_at	ADGRE2	stable	30817
1435	0.339969	8.26913	3.27339	0.00268454	0.0433483	-1.80685	201485_s_at	RCN2	stable	5955
1436	0.274384	6.40189	3.27305	0.00268685	0.0433635	-1.80765	221548_s_at	ILKAP	stable	80895
1437	-0.350071	8.34955	-3.27187	0.00269516	0.0434516	-1.8105	211779_x_at	AP2A2	stable	161
1438	0.490439	9.45919	3.27167	0.00269652	0.0434516	-1.81097	228376_at	GGTA1	stable	2681
1439	-0.310787	8.97888	-3.2716	0.00269705	0.0434516	-1.81115	222997_s_at	MRPS21	stable	54460
1440	-0.709723	5.4547	-3.27121	0.00269977	0.0434786	-1.81208	219540_at	ZNF267	down	10308
1441	0.624821	5.85289	3.27096	0.00270152	0.043491	-1.81268	205257_s_at	AMPH	up	273
1442	0.576515	7.77704	3.27009	0.0027076	0.0435254	-1.81475	225421_at	PM20D2	up	135293
1443	-0.388457	5.14104	-3.26956	0.00271131	0.0435618	-1.81602	1552575_a_at	C6orf141	stable	135398
1444	-0.663631	8.62087	-3.26839	0.00271955	0.0436558	-1.81882	202497_x_at	SLC2A3	down	6515
1445	0.506011	6.5401	3.26676	0.00273109	0.0437884	-1.82273	227347_x_at	HES4	up	57801
1446	-0.334031	6.48494	-3.26413	0.00274976	0.0440114	-1.82902	206910_x_at	CFHR2	stable	3080
1447	0.470883	7.84367	3.26237	0.00276233	0.0441799	-1.83323	203157_s_at	GLS	stable	2744
1448	0.410337	6.18525	3.26226	0.00276317	0.0441799	-1.83351	203207_s_at	MTFR1	stable	9650
1449	-0.886549	6.50971	-3.26221	0.00276352	0.0441799	-1.83363	208438_s_at	FGR	down	2268
1450	0.312869	7.74645	3.26121	0.00277071	0.044282	-1.83603	203689_s_at	FMR1	stable	2332
1451	0.456549	5.69941	3.2593	0.00278446	0.0444757	-1.8406	225521_at	ANAPC7	stable	51434
1452	0.301165	4.90989	3.25906	0.00278621	0.0444906	-1.84118	1561539_at	FZD4-DT	stable	100506368
1453	0.272869	6.6526	3.258	0.00279384	0.0445474	-1.8437	226168_at	ZFAND2B	stable	130617
1454	-0.261004	8.79389	-3.2573	0.00279893	0.0445955	-1.84538	221263_s_at	SF3B5	stable	83443
1455	-1.01479	6.5129	-3.257	0.00280109	0.0446111	-1.84609	204204_at	SLC31A2	down	1318
1456	-0.175097	5.15627	-3.25666	0.00280354	0.044634	-1.8469	204562_at	IRF4	stable	3662
1457	-0.650926	7.34034	-3.25586	0.00280936	0.0446906	-1.84881	221009_s_at	ANGPTL4	down	51129
1458	0.728115	6.76222	3.25468	0.00281798	0.044773	-1.85164	204730_at	RIMS3	up	9783
1459	0.337833	7.44303	3.25432	0.00282064	0.0447788	-1.85251	204369_at	PIK3CA	stable	5290
1460	-0.239587	3.52203	-3.25264	0.00283294	0.0449589	-1.85653	218888_s_at	NETO2	stable	81831
1461	0.226422	6.52307	3.25251	0.00283386	0.0449589	-1.85683	225689_at	POMGNT2	stable	84892
1462	-0.406117	5.54859	-3.25227	0.00283562	0.0449624	-1.8574	223683_at	ZMYND15	stable	84225
1463	1.11412	8.72225	3.25199	0.00283765	0.044963	-1.85806	207317_s_at	CASQ2	up	845
1464	0.438595	7.0917	3.25039	0.0028495	0.045106	-1.86191	227113_at	ADHFE1	stable	137872
1465	-0.367883	5.91676	-3.24875	0.00286156	0.0452411	-1.8658	230200_at	NSUN6	stable	221078
1466	-0.979731	5.59015	-3.24856	0.002863	0.0452411	-1.86627	223361_at	ABRACL	down	58527
1467	0.40777	6.25222	3.24835	0.00286456	0.0452527	-1.86677	1552663_a_at	ERC1	stable	23085
1468	-0.236453	3.99059	-3.24814	0.00286608	0.0452545	-1.86726	220832_at	TLR8	stable	51311
1469	-0.208765	4.31403	-3.24795	0.0028675	0.0452599	-1.86772	1555416_a_at	ALOX15B	stable	247
1470	-2.55987	5.46551	-3.24656	0.00287788	0.0453713	-1.87105	204580_at	MMP12	down	4321
1471	0.730104	5.49945	3.24624	0.00288023	0.0453823	-1.87181	232752_at	LOXL1-AS1	up	100287616
1472	-0.26385	5.11058	-3.2461	0.00288127	0.0453856	-1.87214	210448_s_at	P2RX5	stable	5026
1473	-0.298857	6.41059	-3.2451	0.00288877	0.0454596	-1.87454	232172_at	CD99P1	stable	401577
1474	-0.170493	3.43437	-3.24115	0.00291846	0.0458057	-1.88397	219306_at	KIF15	stable	56992
1475	0.307925	8.33635	3.24082	0.00292089	0.0458118	-1.88474	212337_at	TUG1	stable	55000
1476	0.381323	4.21918	3.24047	0.00292357	0.0458209	-1.88558	219532_at	ELOVL4	stable	6785
1477	-1.19619	7.76122	-3.24041	0.00292399	0.0458209	-1.88572	206391_at	RARRES1	down	5918
1478	-1.65734	6.23273	-3.24011	0.00292631	0.0458441	-1.88645	209728_at	HLA-DRB4	down	3126
1479	0.365274	5.98743	3.23896	0.00293498	0.0459521	-1.88918	232166_at	CEP126	stable	57562
1480	0.21822	8.42675	3.23829	0.00294012	0.0459946	-1.89079	201263_at	TARS1	stable	6897
1481	0.319382	4.02639	3.2377	0.00294458	0.0460381	-1.89219	219645_at	CASQ1	stable	844
1482	0.415912	6.89633	3.23586	0.00295864	0.0462363	-1.89658	201556_s_at	VAMP2	stable	6844
1483	-0.234377	7.53031	-3.23582	0.00295896	0.0462363	-1.89668	218069_at	DCTPP1	stable	79077
1484	0.32827	12.0073	3.23531	0.00296286	0.0462765	-1.8979	201215_at	PLS3	stable	5358
1485	-0.559293	4.30238	-3.23526	0.00296322	0.0462765	-1.89801	219014_at	PLAC8	down	51316
1486	-0.523698	4.77938	-3.23101	0.00299592	0.0466543	-1.90813	210119_at	KCNJ15	down	3772
1487	-0.346756	5.59853	-3.23101	0.00299594	0.0466543	-1.90814	204233_s_at	CHKA	stable	1119
1488	0.242878	3.94508	3.23068	0.0029985	0.0466808	-1.90893	1553646_at	HDX	stable	139324
1489	0.525259	6.43101	3.22963	0.00300665	0.0467547	-1.91143	1555269_a_at	ANO1	up	55107
1490	0.235252	4.02887	3.22955	0.00300731	0.0467547	-1.91163	206428_s_at	ZNF143	stable	7702
1491	-0.883639	6.635	-3.2292	0.00300995	0.0467547	-1.91244	202625_at	LYN	down	4067
1492	0.307198	9.7154	3.2292	0.00300999	0.0467547	-1.91245	201542_at	SAR1A	stable	56681
1493	0.242849	8.74234	3.22881	0.00301301	0.0467796	-1.91338	212904_at	LRRC47	stable	57470
1494	0.235185	7.59754	3.2286	0.00301463	0.0467796	-1.91388	201914_s_at	SEC63	stable	11231
1495	-0.489262	4.59644	-3.22843	0.00301597	0.0467796	-1.91428	214581_x_at	TNFRSF21	stable	27242
1496	-0.263579	5.87634	-3.22781	0.00302085	0.046842	-1.91578	228742_at	LOC101928092	stable	101928092
1497	-0.271619	4.2877	-3.22694	0.00302765	0.0469255	-1.91785	206316_s_at	KNTC1	stable	9735
1498	0.421562	9.32174	3.22659	0.00303038	0.0469498	-1.91868	208924_at	RNF11	stable	26994
1499	-0.315928	5.19616	-3.22571	0.00303722	0.047013	-1.92076	220694_at	ASAP1-IT1	stable	29065
1500	-0.274243	4.44998	-3.22552	0.00303875	0.047013	-1.92122	219544_at	BORA	stable	79866
1501	-1.0868	4.39732	-3.22443	0.00304733	0.0471191	-1.92383	205267_at	POU2AF1	down	5450
1502	-0.368268	4.36389	-3.22386	0.00305177	0.0471552	-1.92517	214081_at	PLXDC1	stable	57125
1503	-0.398442	6.81764	-3.22345	0.00305503	0.0471714	-1.92615	212516_at	ARAP1	stable	116985
1504	0.320794	6.55187	3.22203	0.00306626	0.047318	-1.92953	223021_x_at	VTA1	stable	51534
1505	-1.1245	6.54103	-3.22161	0.00306961	0.0473564	-1.93054	205419_at	GPR183	down	1880
1506	-0.31936	7.21762	-3.22133	0.00307179	0.0473633	-1.9312	202990_at	PYGL	stable	5836
1507	0.476225	6.25878	3.21963	0.00308526	0.0474923	-1.93523	228984_at	CARNS1	stable	57571
1508	0.227736	10.681	3.21962	0.00308537	0.0474923	-1.93526	200945_s_at	SEC31A	stable	22872
1509	-0.607333	7.21224	-3.21948	0.0030865	0.0474963	-1.9356	209030_s_at	CADM1	down	23705
1510	-0.26742	4.88996	-3.21808	0.00309767	0.0475837	-1.93893	204767_s_at	FEN1	stable	2237
1511	-0.372849	9.8347	-3.218	0.00309827	0.0475837	-1.93911	218213_s_at	TMEM258	stable	746
1512	0.491721	7.90134	3.21562	0.00311737	0.0477696	-1.94477	204497_at	ADCY9	stable	115
1513	0.334074	6.091	3.21438	0.00312739	0.0478829	-1.94773	201790_s_at	DHCR7	stable	1717
1514	0.195246	3.44915	3.21421	0.00312877	0.0478907	-1.94814	204709_s_at	KIF23	stable	9493
1515	-0.228146	11.8148	-3.21221	0.00314496	0.0480447	-1.95289	200715_x_at	RPL13A	stable	23521
1516	0.488436	6.62218	3.21199	0.00314674	0.0480447	-1.95342	209454_s_at	TEAD3	stable	7005
1517	-0.277858	9.02609	-3.21164	0.00314951	0.0480602	-1.95423	202152_x_at	USF2	stable	7392
1518	-0.745385	8.15567	-3.21137	0.00315171	0.0480646	-1.95487	206481_s_at	LDB2	down	9079
1519	0.220742	5.5883	3.21109	0.003154	0.0480646	-1.95554	1558914_at	DESI2	stable	51029
1520	0.414588	7.76062	3.21107	0.0031542	0.0480646	-1.9556	213447_at	IPW	stable	3653
1521	-0.547504	7.95471	-3.20957	0.00316641	0.0482103	-1.95916	205055_at	ITGAE	down	3682
1522	0.346104	6.68471	3.20625	0.00319365	0.048544	-1.96705	203711_s_at	HIBCH	stable	26275
1523	0.371396	6.65537	3.20606	0.00319518	0.0485538	-1.96749	202616_s_at	MECP2	stable	4204
1524	-0.42682	5.10003	-3.20481	0.00320546	0.0486559	-1.97045	205312_at	SPI1	stable	6688
1525	0.409053	6.02574	3.20141	0.00323372	0.0489986	-1.97854	214849_at	KCTD20	stable	222658
1526	-0.870704	6.9277	-3.20101	0.003237	0.0489986	-1.97947	225541_at	RPL22L1	down	200916
1527	-1.03916	7.37941	-3.19947	0.00324986	0.0491389	-1.98313	203665_at	HMOX1	down	3162
1528	0.32857	4.20534	3.19767	0.00326501	0.0492862	-1.98741	223799_at	MSANTD4	stable	84437
1529	-0.292451	9.39023	-3.19648	0.00327502	0.0493843	-1.99023	201216_at	ERP29	stable	10961
1530	0.285385	8.31457	3.19627	0.00327674	0.0493843	-1.99071	202967_at	GSTA4	stable	2941
1531	-0.190721	3.60695	-3.19616	0.00327772	0.0493843	-1.99099	1568943_at	INPP5D	stable	3635
1532	-0.375061	3.92646	-3.19202	0.00331278	0.0497736	-2.00079	206337_at	CCR7	stable	1236
1533	-0.242159	5.01832	-3.18972	0.00333248	0.0500146	-2.00625	205505_at	GCNT1	stable	2650
1534	-0.32165	4.89868	-3.1895	0.00333438	0.0500157	-2.00678	1554258_a_at	DNAJC5B	stable	85479
1535	0.35787	6.83037	3.18865	0.00334166	0.050096	-2.00878	217593_at	ZSCAN18	stable	65982
1536	-0.184259	4.54823	-3.18825	0.00334506	0.0501182	-2.00972	228281_at	DDIAS	stable	220042
1537	-0.218477	9.27609	-3.18682	0.00335738	0.0502147	-2.01311	217868_s_at	METTL9	stable	51108
1538	-0.165067	3.21345	-3.18671	0.00335837	0.0502147	-2.01338	223381_at	NUF2	stable	83540
1539	-0.208772	4.56653	-3.18637	0.00336134	0.0502348	-2.01419	219687_at	HHAT	stable	55733
1540	-0.83369	4.54913	-3.18631	0.00336185	0.0502348	-2.01433	204259_at	MMP7	stable	4316
1541	-0.50626	6.7461	-3.18566	0.00336744	0.0502771	-2.01586	206359_at	SOCS3	stable	9021
1542	0.204984	4.19718	3.18544	0.00336932	0.0502773	-2.01637	208106_x_at	PSG6	stable	5675
1543	0.843702	5.14915	3.18459	0.00337672	0.0503469	-2.01839	1555123_at	ST6GAL2	stable	84620
1544	0.245542	6.63037	3.18173	0.00340164	0.0506494	-2.02516	205526_s_at	KATNA1	stable	11104
1545	0.259822	7.60043	3.18029	0.00341421	0.0507261	-2.02856	200848_at	AHCYL1	stable	10768
1546	-0.460656	7.52895	-3.17887	0.00342669	0.0508562	-2.03192	226244_at	CLEC14A	stable	161198
1547	0.578736	6.83448	3.17529	0.00345839	0.0511909	-2.04039	204187_at	GMPR	stable	2766
1548	-0.199111	8.5736	-3.17503	0.00346072	0.0511962	-2.04101	202487_s_at	H2AZ2	stable	94239
1549	0.264765	9.50982	3.17482	0.00346252	0.0512073	-2.04149	200992_at	IPO7	stable	10527
1550	0.46129	4.42649	3.17324	0.00347667	0.0513962	-2.04524	213325_at	NECTIN3	stable	25945
1551	0.239131	12.7686	3.17308	0.00347804	0.0513962	-2.04561	201162_at	IGFBP7	stable	3490
1552	0.428991	6.2176	3.17307	0.00347811	0.0513962	-2.04563	224974_at	SUDS3	stable	64426
1553	-0.224355	3.67903	-3.17157	0.00349155	0.0515251	-2.04918	220085_at	HELLS	stable	3070
1554	0.407485	9.44094	3.16896	0.00351504	0.0517995	-2.05535	212698_s_at	SEPTIN10	stable	151011
1555	-0.206481	6.5568	-3.16874	0.00351704	0.0518033	-2.05587	225505_s_at	PCED1A	stable	64773
1556	-0.265941	5.84652	-3.16779	0.00352561	0.0518527	-2.05811	218844_at	ACSF2	stable	80221
1557	-0.254264	8.95708	-3.16763	0.00352708	0.0518527	-2.05849	208091_s_at	VOPP1	stable	81552
1558	-0.256206	4.01367	-3.16761	0.00352725	0.0518527	-2.05854	207777_s_at	SP140	stable	11262
1559	-0.377212	6.79721	-3.16672	0.00353528	0.0519321	-2.06063	225898_at	WDR54	stable	84058
1560	0.390407	6.78652	3.16654	0.00353696	0.0519429	-2.06107	213341_at	FEM1C	stable	56929
1561	0.3663	10.2023	3.16405	0.00355957	0.0522329	-2.06693	201234_at	ILK	stable	3611
1562	0.222179	9.62155	3.16364	0.0035633	0.0522598	-2.06789	225793_at	LIX1L	stable	128077
1563	0.743405	7.08032	3.1629	0.00357011	0.0522933	-2.06965	205208_at	ALDH1L1	stable	10840
1564	-0.461241	5.5315	-3.16206	0.00357779	0.0523736	-2.07163	220108_at	GNA14	stable	9630
1565	0.249886	6.87371	3.15903	0.00360571	0.0526815	-2.07878	223249_at	CLDN12	stable	9069
1566	-1.10954	6.49327	-3.1588	0.00360787	0.0526815	-2.07933	202859_x_at	CXCL8	stable	3576
1567	0.249534	4.03761	3.15863	0.00360942	0.0526815	-2.07972	209532_at	PLAA	stable	9373
1568	0.331498	5.56335	3.15794	0.00361581	0.0527466	-2.08135	219116_s_at	DCUN1D2	stable	55208
1569	-0.31131	9.85368	-3.15755	0.00361938	0.0527706	-2.08226	224637_at	OST4	stable	100128731
1570	-0.416606	11.8324	-3.15736	0.00362121	0.0527832	-2.08272	203083_at	THBS2	stable	7058
1571	0.358999	4.93371	3.15711	0.00362351	0.0528026	-2.08331	1557918_s_at	SLC16A1	stable	6566
1572	0.235354	6.26341	3.15659	0.00362832	0.0528233	-2.08453	218176_at	MAGEF1	stable	64110
1573	0.190765	4.97459	3.15654	0.00362877	0.0528233	-2.08464	214537_at	H1-3	stable	3007
1574	-0.37627	8.77612	-3.15632	0.00363081	0.0528233	-2.08516	201998_at	ST6GAL1	stable	6480
1575	-0.262675	6.86593	-3.15583	0.00363537	0.0528628	-2.08631	218749_s_at	SLC8B1	stable	80024
1576	0.255652	9.25843	3.15521	0.00364115	0.0529327	-2.08777	209384_at	PLPBP	stable	11212
1577	-0.12389	3.37478	-3.15491	0.003644	0.0529459	-2.08849	1559221_at	LINC01013	stable	100507254
1578	0.576712	4.53719	3.15234	0.00366802	0.0532082	-2.09453	218772_x_at	TMEM38B	stable	55151
1579	-0.207715	9.10832	-3.15162	0.00367483	0.0532691	-2.09624	208693_s_at	GARS1	stable	2617
1580	-0.278468	7.03447	-3.15019	0.00368828	0.0534003	-2.0996	213464_at	SHC2	stable	25759
1581	0.420007	9.68683	3.14869	0.00370245	0.0535817	-2.10313	212647_at	RRAS	stable	6237
1582	0.595992	6.0946	3.14776	0.00371135	0.0536536	-2.10533	204058_at	ME1	stable	4199
1583	-0.443095	8.53677	-3.14718	0.00371685	0.0536764	-2.1067	210993_s_at	SMAD1	stable	4086
1584	-0.308032	4.14001	-3.14695	0.00371905	0.0536798	-2.10724	238439_at	ANKRD22	stable	118932
1585	0.525853	5.96116	3.14641	0.00372414	0.0537249	-2.1085	219368_at	NAP1L2	stable	4674
1586	-0.360658	8.20031	-3.14624	0.00372579	0.0537339	-2.10891	1555041_a_at	NAGA	stable	4668
1587	0.473625	7.86012	3.14614	0.00372673	0.0537339	-2.10914	203803_at	PCYOX1	stable	51449
1588	-0.878483	4.64918	-3.14566	0.00373135	0.0537524	-2.11028	211633_x_at	IGHG1	stable	3500
1589	0.304428	7.36331	3.14561	0.00373178	0.0537524	-2.11038	213012_at	NEDD4	stable	4734
1590	0.588885	9.71401	3.14559	0.00373195	0.0537524	-2.11042	227167_s_at	RASSF3	stable	283349
1591	0.45276	6.44263	3.14536	0.00373416	0.0537701	-2.11097	203427_at	ASF1A	stable	25842
1592	0.537721	5.54656	3.14523	0.0037354	0.0537738	-2.11127	221542_s_at	ERLIN2	stable	11160
1593	0.975081	8.15401	3.14502	0.00373743	0.0537889	-2.11177	229339_at	MYOCD	stable	93649
1594	-1.14824	6.03959	-3.1439	0.00374813	0.0539286	-2.1144	205612_at	MMRN1	stable	22915
1595	-0.300943	6.17926	-3.14355	0.00375152	0.0539349	-2.11523	228244_at	BLOC1S3	stable	388552
1596	-0.20535	7.60201	-3.14259	0.00376078	0.0540395	-2.1175	210386_s_at	MTX1	stable	4580
1597	-0.286903	6.54816	-3.14237	0.00376282	0.0540547	-2.118	218838_s_at	TTC31	stable	64427
1598	0.348093	8.33676	3.14218	0.00376465	0.0540667	-2.11844	218127_at	NFYB	stable	4801
1599	0.232759	7.57064	3.1394	0.00379151	0.0543669	-2.12498	226996_at	LCLAT1	stable	253558
1600	-0.598476	11.2642	-3.13708	0.00381417	0.0545464	-2.13046	202283_at	SERPINF1	stable	5176
1601	0.191013	6.43301	3.13705	0.00381442	0.0545464	-2.13052	204651_at	NRF1	stable	4899
1602	0.325588	6.5399	3.13703	0.00381461	0.0545464	-2.13056	204824_at	ENDOG	stable	2021
1603	0.724461	5.26908	3.13701	0.00381479	0.0545464	-2.13061	1552737_s_at	WWP2	stable	11060
1604	0.15737	4.05354	3.13699	0.003815	0.0545464	-2.13066	210080_x_at	CELA3A	stable	10136
1605	-0.250336	3.47245	-3.1364	0.00382076	0.0546001	-2.13204	242714_at	LOC101928429	stable	101928429
1606	0.685751	6.95033	3.13593	0.00382535	0.0546313	-2.13315	205357_s_at	AGTR1	stable	185
1607	-0.430029	6.25858	-3.13587	0.00382594	0.0546313	-2.13329	203234_at	UPP1	stable	7378
1608	-0.805625	6.30754	-3.13524	0.00383212	0.05468	-2.13477	212820_at	DMXL2	stable	23312
1609	0.642182	7.62087	3.13519	0.00383263	0.05468	-2.13489	219743_at	HEY2	stable	23493
1610	0.320494	9.51401	3.13404	0.00384385	0.0548012	-2.13758	217800_s_at	NDFIP1	stable	80762
1611	-0.343354	6.93715	-3.13289	0.00385522	0.0549319	-2.14029	202813_at	TARBP1	stable	6894
1612	-0.196336	12.8073	-3.13237	0.0038603	0.054964	-2.1415	203107_x_at	RPS2	stable	6187
1613	0.26633	6.41052	3.13208	0.00386316	0.0549904	-2.14218	214194_at	DIS3	stable	22894
1614	0.278833	7.32182	3.13096	0.0038742	0.0551189	-2.14481	212458_at	SPRED2	stable	200734
1615	-0.271202	4.84096	-3.13028	0.00388099	0.0552012	-2.14642	204592_at	DLG4	stable	1742
1616	0.223645	4.21297	3.13002	0.00388357	0.055209	-2.14703	1559050_at	HCG27	stable	253018
1617	0.312944	6.74982	3.12955	0.00388818	0.0552459	-2.14812	201961_s_at	RNF41	stable	10193
1618	0.409887	5.4505	3.12908	0.00389293	0.0552717	-2.14924	221207_s_at	NBEA	stable	26960
1619	-0.24509	7.94036	-3.12869	0.00389679	0.0552964	-2.15015	223396_at	TMEM60	stable	85025
1620	0.439018	3.93498	3.12722	0.00391145	0.0554613	-2.1536	241873_at	UNC5C-AS1	stable	105377335
1621	0.461347	5.5732	3.1255	0.00392868	0.055621	-2.15764	218266_s_at	NCS1	stable	23413
1622	0.336198	3.91786	3.12546	0.00392907	0.055621	-2.15773	230930_at	LOC105376486	stable	105376486
1623	0.481788	10.1154	3.12538	0.00392983	0.055621	-2.15791	212865_s_at	COL14A1	stable	7373
1624	-0.693901	6.48524	-3.12126	0.00397145	0.056025	-2.16758	209324_s_at	RGS16	stable	6004
1625	0.156672	3.70496	3.12061	0.00397797	0.0560602	-2.16909	1564459_at	DDC-AS1	stable	100129427
1626	-0.298438	5.66231	-3.12058	0.0039783	0.0560602	-2.16917	205131_x_at	CLEC11A	stable	6320
1627	0.261418	9.17806	3.11985	0.00398576	0.0561364	-2.17089	223336_s_at	RAB18	stable	22931
1628	0.312204	7.98592	3.11936	0.00399065	0.0561619	-2.17202	209155_s_at	NT5C2	stable	22978
1629	0.228838	7.94557	3.11864	0.00399805	0.0561917	-2.17372	1553218_a_at	ZNF512	stable	84450
1630	0.418034	9.91636	3.11856	0.00399891	0.0561917	-2.17391	201554_x_at	GYG1	stable	2992
1631	-0.223419	5.94896	-3.11855	0.00399894	0.0561917	-2.17392	218777_at	REEP4	stable	80346
1632	-0.363951	5.66399	-3.1174	0.00401075	0.0563205	-2.17663	207650_x_at	PTGER1	stable	5731
1633	-0.26151	4.17915	-3.11731	0.00401164	0.0563205	-2.17683	226132_s_at	MANEAL	stable	149175
1634	0.277444	5.6484	3.11693	0.00401551	0.0563232	-2.17772	1554807_a_at	SPIRE1	stable	56907
1635	-0.322485	6.68882	-3.11532	0.00403207	0.0564805	-2.1815	223615_at	ABI3	stable	51225
1636	-0.187652	10.1861	-3.11505	0.0040348	0.0564924	-2.18212	208659_at	CLIC1	stable	1192
1637	0.274798	6.99403	3.11461	0.00403934	0.0565214	-2.18315	225997_at	MOB1B	stable	92597
1638	-0.650639	5.73372	-3.11428	0.00404274	0.0565267	-2.18392	202869_at	OAS1	stable	4938
1639	-0.165669	12.2737	-3.11366	0.0040491	0.0565912	-2.18537	211628_x_at	FTH1P5	stable	2509
1640	-0.296285	4.54444	-3.11036	0.0040834	0.0570122	-2.19311	219788_at	PILRA	stable	29992
1641	-0.279892	7.45048	-3.10939	0.0040935	0.0571386	-2.19538	227366_at	RILP	stable	83547
1642	-0.31171	4.64714	-3.10884	0.0040992	0.057189	-2.19666	219874_at	SLC12A8	stable	84561
1643	0.314965	5.72514	3.1084	0.0041038	0.0572242	-2.19769	205911_at	PTH1R	stable	5745
1644	0.265815	6.95783	3.10651	0.00412356	0.0574229	-2.2021	212357_at	FAM168A	stable	23201
1645	-0.892526	9.33606	-3.10599	0.00412909	0.0574741	-2.20333	223121_s_at	SFRP2	stable	6423
1646	0.139725	3.94916	3.10496	0.00413987	0.0575947	-2.20572	1570186_at	TAMALIN-AS1	stable	692159
1647	-0.438457	8.87159	-3.1035	0.00415537	0.0577757	-2.20915	217933_s_at	LAP3	stable	51056
1648	0.461486	7.31408	3.1034	0.00415635	0.0577757	-2.20937	219443_at	TASP1	stable	55617
1649	0.292971	3.84618	3.10331	0.00415735	0.0577757	-2.20959	1554915_a_at	PDE12	stable	201626
1650	-0.538446	5.95654	-3.10283	0.00416244	0.0577837	-2.21072	209679_s_at	SMAGP	stable	57228
1651	-0.238123	4.35792	-3.1024	0.00416695	0.0578243	-2.21171	229534_at	ACOT4	stable	122970
1652	-0.312264	5.16469	-3.10156	0.00417591	0.0579193	-2.21368	1561336_at	DNASE1L3	stable	1776
1653	0.20983	4.55306	3.10092	0.0041827	0.0579987	-2.21517	1556494_at	LINC01365	stable	101927007
1654	0.416072	5.95163	3.10056	0.00418651	0.0580368	-2.21601	1555240_s_at	GNG12	stable	55970
1655	0.249518	6.97223	3.10032	0.00418909	0.058058	-2.21657	218338_at	PHC1	stable	1911
1656	-0.230981	7.52449	-3.09801	0.00421386	0.0582845	-2.22198	203466_at	MPV17	stable	4358
1657	-0.553427	5.1276	-3.09643	0.00423077	0.0584431	-2.22566	223500_at	CPLX1	stable	10815
1658	-1.23142	6.4421	-3.09444	0.00425228	0.0586068	-2.23031	206100_at	CPM	stable	1368
1659	0.486423	6.7835	3.09326	0.00426501	0.0587231	-2.23305	203627_at	IGF1R	stable	3480
1660	0.456668	6.05861	3.09208	0.0042779	0.0588807	-2.23582	1558102_at	HDGFL3	stable	50810
1661	-0.337842	3.99469	-3.09159	0.00428323	0.0589294	-2.23697	238091_at	RPH3AL-AS1	stable	100506388
1662	-0.373928	6.4304	-3.09128	0.00428654	0.0589602	-2.23768	219257_s_at	SPHK1	stable	8877
1663	-0.242257	7.51626	-3.09075	0.00429241	0.0589618	-2.23893	201818_at	LPCAT1	stable	79888
1664	0.458922	4.21628	3.0905	0.00429509	0.0589621	-2.2395	240633_at	DOK7	stable	285489
1665	-0.224491	4.52994	-3.09048	0.00429531	0.0589621	-2.23955	203145_at	SPAG5	stable	10615
1666	0.241469	5.49423	3.08647	0.00433931	0.0593277	-2.2489	1554468_s_at	FBF1	stable	85302
1667	0.799607	4.96193	3.08591	0.00434547	0.0593972	-2.2502	219728_at	MYOT	stable	9499
1668	0.256163	9.39883	3.08492	0.00435649	0.0595138	-2.25253	218047_at	OSBPL9	stable	114883
1669	-0.195551	3.39414	-3.08391	0.00436764	0.0596321	-2.25487	241986_at	BMPER	stable	168667
1670	0.333137	8.78708	3.08351	0.00437209	0.0596566	-2.2558	223170_at	TMEM98	stable	26022
1671	0.195725	8.0864	3.08252	0.0043831	0.0597769	-2.25811	201198_s_at	PSMD1	stable	5707
1672	0.370514	6.46355	3.08235	0.00438502	0.0597883	-2.25851	1553974_at	C22orf39	stable	128977
1673	-0.336636	4.75425	-3.08193	0.0043896	0.0598358	-2.25947	228636_at	BHLHE22	stable	27319
1674	0.34434	8.30613	3.08176	0.00439156	0.0598476	-2.25988	225785_at	REEP3	stable	221035
1675	0.34269	7.52458	3.08061	0.00440437	0.0599986	-2.26255	201276_at	RAB5B	stable	5869
1676	-0.186552	3.77992	-3.07981	0.00441333	0.0600993	-2.26441	1553635_s_at	DYNLT5	stable	200132
1677	0.566514	5.45217	3.07943	0.00441759	0.0601274	-2.2653	213622_at	COL9A2	stable	1298
1678	-0.357011	9.42924	-3.07748	0.00443951	0.0604107	-2.26984	207643_s_at	TNFRSF1A	stable	7132
1679	-0.364683	5.74346	-3.07595	0.00445677	0.0605904	-2.27339	208510_s_at	PPARG	stable	5468
1680	0.225477	7.60965	3.07511	0.00446635	0.0606853	-2.27536	209455_at	FBXW11	stable	23291
1681	0.365792	5.59429	3.07289	0.00449158	0.060948	-2.28053	203894_at	TUBG2	stable	27175
1682	0.235672	8.27818	3.07269	0.00449388	0.060948	-2.281	227554_at	MAGI2-AS3	stable	100505881
1683	-0.145243	3.86766	-3.07262	0.0044946	0.060948	-2.28115	219705_at	QSER1	stable	79832
1684	1.01644	7.48937	3.07112	0.00451177	0.061119	-2.28464	227091_at	CCDC146	stable	57639
1685	-0.332641	8.35251	-3.07103	0.0045128	0.061119	-2.28485	218983_at	C1RL	stable	51279
1686	-0.189623	4.51534	-3.06923	0.00453348	0.0613281	-2.28904	1558770_a_at	PIK3R6	stable	146850
1687	0.20554	6.67871	3.06903	0.00453575	0.0613387	-2.2895	203943_at	KIF3B	stable	9371
1688	0.36379	8.56069	3.06831	0.00454408	0.0614361	-2.29118	202536_at	CHMP2B	stable	25978
1689	0.420347	10.2214	3.06805	0.00454703	0.0614607	-2.29178	209191_at	TUBB6	stable	84617
1690	-0.250887	7.1173	-3.06762	0.00455195	0.0615121	-2.29277	205546_s_at	TYK2	stable	7297
1691	0.233549	6.81228	3.06741	0.00455439	0.0615299	-2.29326	204460_s_at	RAD1	stable	5810
1692	0.217988	4.49771	3.06723	0.00455646	0.0615302	-2.29368	1558333_at	C22orf15	stable	150248
1693	0.246555	4.33174	3.06711	0.00455786	0.0615302	-2.29396	1552775_at	GPRC6A	stable	222545
1694	0.16297	3.58867	3.06679	0.00456159	0.0615302	-2.29471	1563171_at	GNA14-AS1	stable	101927422
1695	0.461597	9.36982	3.06673	0.0045623	0.0615302	-2.29485	204834_at	FGL2	stable	10875
1696	0.316154	8.3595	3.06623	0.00456807	0.0615778	-2.29601	212459_x_at	SUCLG2	stable	8801
1697	0.192963	7.89793	3.06588	0.00457215	0.0616176	-2.29683	222516_at	AP3M1	stable	26985
1698	0.552567	7.47793	3.06554	0.00457607	0.0616551	-2.29761	229963_at	BEX5	stable	340542
1699	-0.258193	7.6425	-3.06496	0.00458278	0.0617304	-2.29896	227402_s_at	UTP23	stable	84294
1700	0.387838	3.63973	3.06398	0.00459415	0.0618682	-2.30123	225939_at	EIF4E3	stable	317649
1701	0.201463	12.3947	3.06372	0.00459719	0.0618939	-2.30183	207243_s_at	CALM2	stable	805
1702	-0.241794	5.89151	-3.06284	0.00460747	0.0619866	-2.30388	238638_at	SLC37A2	stable	219855
1703	-0.355092	9.49603	-3.06229	0.00461393	0.0620582	-2.30516	217436_x_at	HLA-J	stable	3137
1704	0.20848	9.57488	3.06144	0.00462379	0.0621619	-2.30712	212813_at	JAM3	stable	83700
1705	0.246385	9.60061	3.05927	0.00464937	0.0623967	-2.31217	202646_s_at	CSDE1	stable	7812
1706	0.252345	10.0305	3.05887	0.00465408	0.0624334	-2.3131	205353_s_at	PEBP1	stable	5037
1707	0.518087	7.86074	3.05754	0.0046697	0.0625339	-2.31617	218919_at	ZFAND1	stable	79752
1708	0.25884	6.29007	3.05753	0.00466988	0.0625339	-2.31621	217905_at	MCMBP	stable	79892
1709	0.25879	6.13899	3.05581	0.00469023	0.0627295	-2.32019	212340_at	YIPF6	stable	286451
1710	0.564893	7.34445	3.05475	0.00470283	0.0628673	-2.32265	221214_s_at	NSMF	stable	26012
1711	0.221615	3.55067	3.05412	0.00471036	0.0629506	-2.32412	1563466_at	MYLK	stable	4638
1712	0.319791	5.58681	3.05402	0.00471159	0.0629506	-2.32435	202744_at	SLC20A2	stable	6575
1713	0.342626	5.47965	3.05261	0.00472834	0.0630849	-2.32761	220773_s_at	GPHN	stable	10243
1714	0.3103	7.65013	3.05086	0.00474939	0.0632391	-2.33167	202893_at	UNC13B	stable	10497
1715	-0.338564	6.50563	-3.05077	0.00475047	0.0632391	-2.33188	212908_at	DNAJC16	stable	23341
1716	0.22875	8.45301	3.04942	0.00476669	0.0633955	-2.33501	208093_s_at	NDEL1	stable	81565
1717	0.386308	9.94385	3.04783	0.00478591	0.0635584	-2.33869	218718_at	PDGFC	stable	56034
1718	0.305577	5.00076	3.04714	0.00479424	0.0636381	-2.34028	223805_at	OSBPL6	stable	114880
1719	-0.57144	6.48281	-3.04652	0.00480176	0.0637224	-2.34172	204358_s_at	FLRT2	stable	23768
1720	0.405193	6.50624	3.04609	0.00480698	0.0637593	-2.34271	210540_s_at	B4GALT4	stable	8702
1721	0.264095	6.08385	3.04358	0.00483762	0.0640582	-2.34853	201677_at	HMCES	stable	56941
1722	0.347648	11.1572	3.04234	0.00485286	0.0641824	-2.35141	202228_s_at	NPTN	stable	27020
1723	0.133995	5.00326	3.04214	0.00485521	0.0641979	-2.35186	1569536_at	FLVCR2	stable	55640
1724	0.396044	7.61057	3.0418	0.00485942	0.0642226	-2.35265	218212_s_at	MOCS2	stable	4338
1725	0.479536	8.33829	3.04141	0.00486425	0.0642709	-2.35356	202804_at	ABCC1	stable	4363
1726	0.2303	6.90301	3.0412	0.00486676	0.0642825	-2.35403	204125_at	NDUFAF1	stable	51103
1727	0.382146	4.91944	3.04062	0.00487395	0.0643233	-2.35538	201370_s_at	CUL3	stable	8452
1728	0.314453	4.77132	3.04016	0.00487962	0.0643648	-2.35645	205741_s_at	DTNA	stable	1837
1729	-0.189959	5.21239	-3.04007	0.00488078	0.0643648	-2.35667	244084_at	AIFM3	stable	150209
1730	0.729786	9.94738	3.03757	0.00491161	0.064709	-2.36243	227226_at	MRAP2	stable	112609
1731	0.714031	8.24088	3.03743	0.00491335	0.0647163	-2.36275	212669_at	CAMK2G	stable	818
1732	-0.211553	8.9291	-3.03699	0.00491888	0.0647669	-2.36379	225083_at	GTF3C6	stable	112495
1733	-0.231035	7.99965	-3.03693	0.00491956	0.0647669	-2.36391	218556_at	ORMDL2	stable	29095
1734	-0.844309	5.38581	-3.03664	0.00492316	0.064781	-2.36458	1558881_at	LINC00924	stable	145820
1735	0.240206	4.04157	3.03655	0.00492438	0.064781	-2.36481	1568849_at	LINC00165	stable	727701
1736	0.24921	7.38315	3.03293	0.00496948	0.0652073	-2.37315	201856_s_at	ZFR	stable	51663
1737	0.282008	7.83319	3.0324	0.00497623	0.0652457	-2.3744	223208_at	KCTD10	stable	83892
1738	0.183553	9.12605	3.03189	0.00498264	0.0652829	-2.37557	209702_at	FTO	stable	79068
1739	0.275245	8.85139	3.03173	0.00498458	0.0652928	-2.37593	207431_s_at	DEGS1	stable	8560
1740	0.553101	8.52671	3.03065	0.00499817	0.0654237	-2.37842	212565_at	STK38L	stable	23012
1741	-0.324012	5.50213	-3.0292	0.00501655	0.0655701	-2.38178	1555907_at	AGAP2-AS1	stable	100130776
1742	0.646838	8.7596	3.02675	0.00504766	0.0658654	-2.38744	213479_at	NPTX2	stable	4885
1743	0.335916	11.77	3.02673	0.00504787	0.0658654	-2.38748	208636_at	ACTN1	stable	87
1744	0.340109	6.76348	3.02666	0.00504878	0.0658654	-2.38764	207081_s_at	PI4KA	stable	5297
1745	-0.357883	5.33685	-3.02634	0.0050528	0.0659022	-2.38837	219557_s_at	NRIP3	stable	56675
1746	0.380997	8.44297	3.02577	0.00506017	0.0659825	-2.3897	223016_x_at	ZRANB2	stable	9406
1747	0.448941	7.85956	3.02364	0.00508738	0.06629	-2.39461	212364_at	MYO1B	stable	4430
1748	0.350528	6.35008	3.02263	0.00510033	0.0664112	-2.39694	219267_at	GLTP	stable	51228
1749	-0.364792	6.16173	-3.02093	0.00512224	0.0666489	-2.40086	220193_at	SH3D21	stable	79729
1750	-0.41392	5.04779	-3.01971	0.00513803	0.0667994	-2.40367	228450_at	PLEKHA7	stable	144100
1751	-0.332834	5.23136	-3.01943	0.0051416	0.0667994	-2.40431	203317_at	PSD4	stable	23550
1752	0.25673	9.68323	3.01941	0.00514198	0.0667994	-2.40438	202939_at	ZMPSTE24	stable	10269
1753	0.501648	11.0078	3.01891	0.00514844	0.0668465	-2.40553	204894_s_at	AOC3	stable	8639
1754	0.251666	9.45574	3.01747	0.00516714	0.0670098	-2.40884	200694_s_at	DDX24	stable	57062
1755	0.375869	5.67601	3.01701	0.00517315	0.06704	-2.40991	1552388_at	SCUBE1	stable	80274
1756	-0.210972	5.18673	-3.01674	0.00517657	0.0670685	-2.41051	219849_at	ZNF671	stable	79891
1757	0.241708	8.51881	3.01336	0.00522091	0.067515	-2.41831	203211_s_at	MTMR2	stable	8898
1758	0.432323	7.34348	3.01306	0.00522481	0.0675448	-2.41899	219179_at	DACT1	stable	51339
1759	-0.434236	4.94723	-3.01202	0.00523859	0.0676622	-2.4214	228275_at	LINC00888	stable	100505687
1760	-0.54523	7.97382	-3.01191	0.00523997	0.0676622	-2.42164	205483_s_at	ISG15	stable	9636
1761	-1.04582	5.26056	-3.01184	0.00524096	0.0676622	-2.42182	209351_at	KRT14	stable	3861
1762	0.346238	5.30117	3.0108	0.00525468	0.0678234	-2.42421	207984_s_at	MPP2	stable	4355
1763	-0.247476	5.54427	-3.01058	0.00525751	0.0678438	-2.4247	209114_at	TSPAN1	stable	10103
1764	-0.50181	7.33665	-3.01006	0.0052645	0.0679118	-2.42591	204079_at	TPST2	stable	8459
1765	0.303355	4.95835	3.00925	0.00527516	0.0679913	-2.42776	203722_at	ALDH4A1	stable	8659
1766	-0.464189	8.50607	-3.00871	0.00528239	0.06806	-2.42902	225049_at	BLOC1S2	stable	282991
1767	-0.21393	3.856	-3.00866	0.00528297	0.06806	-2.42912	207110_at	KCNJ12	stable	3768
1768	0.446073	6.87125	3.00856	0.0052843	0.068061	-2.42935	1558093_s_at	MATR3	stable	9782
1769	0.21448	3.46656	3.00752	0.00529815	0.0682032	-2.43174	226794_at	STXBP5	stable	134957
1770	-0.267355	6.83528	-3.00745	0.00529908	0.0682032	-2.4319	223382_s_at	ZNRF1	stable	84937
1771	-0.816346	6.83525	-3.0069	0.00530645	0.0682304	-2.43317	204114_at	NID2	stable	22795
1772	-0.186153	7.03008	-3.0064	0.00531316	0.0682879	-2.43433	202337_at	PMF1	stable	11243
1773	-0.426461	7.76536	-3.00524	0.00532865	0.0684388	-2.43699	201577_at	NME1	stable	4830
1774	0.218036	4.39728	3.00495	0.00533253	0.0684725	-2.43765	1555139_a_at	OTUD7B	stable	56957
1775	-0.326284	5.25968	-3.00355	0.0053514	0.0686987	-2.44088	218810_at	ZC3H12A	stable	80149
1776	0.392313	7.21171	3.00336	0.00535399	0.0687158	-2.44133	227443_at	LURAP1L	stable	286343
1777	0.348863	4.864	3.00282	0.00536125	0.0687767	-2.44257	206996_x_at	CACNB1	stable	782
1778	-0.273734	7.84321	-3.00247	0.00536597	0.0687889	-2.44337	226348_at	FUT11	stable	170384
1779	0.289806	8.56389	3.00159	0.00537775	0.0689075	-2.44537	225684_at	SKA2	stable	348235
1780	-0.299798	6.33808	-3.0015	0.00537907	0.0689083	-2.4456	222052_at	C19orf54	stable	284325
1781	0.242992	3.50961	3.0012	0.00538304	0.068943	-2.44627	209631_s_at	GPR37	stable	2861
1782	0.513186	4.72601	3.0011	0.00538445	0.0689449	-2.44651	205712_at	PTPRD	stable	5789
1783	-0.420296	4.65312	-2.99915	0.00541089	0.0692024	-2.45099	204860_s_at	NAIP	stable	4671
1784	0.255255	5.0745	2.99869	0.0054172	0.0692669	-2.45205	208496_x_at	H3C8	stable	8355
1785	0.375426	3.87018	2.99836	0.00542165	0.0692793	-2.4528	213469_at	PGAP1	stable	80055
1786	-0.460269	8.14703	-2.99834	0.00542197	0.0692793	-2.45286	221087_s_at	APOL3	stable	80833
1787	-0.271321	12.3593	-2.99637	0.00544885	0.0695528	-2.45738	201665_x_at	RPS17	stable	6218
1788	0.503651	4.94846	2.99521	0.00546472	0.069683	-2.46004	1567213_at	PNN	stable	5411
1789	0.515159	6.50239	2.9951	0.00546631	0.069683	-2.4603	223341_s_at	SCOC	stable	60592
1790	-0.372636	9.54035	-2.99483	0.00546991	0.0697127	-2.4609	208308_s_at	GPI	stable	2821
1791	-0.494218	8.57407	-2.99438	0.00547614	0.0697433	-2.46194	212907_at	SLC30A1	stable	7779
1792	0.198483	8.86636	2.99396	0.00548192	0.0698006	-2.46291	225629_s_at	ZBTB4	stable	57659
1793	-0.311049	6.39451	-2.99279	0.00549802	0.0699404	-2.46559	201702_s_at	PPP1R10	stable	5514
1794	0.193791	4.31544	2.99146	0.00551651	0.0700616	-2.46866	230941_at	C2orf92	stable	728537
1795	-0.491263	7.39724	-2.98989	0.00553818	0.0702775	-2.47224	209119_x_at	NR2F2	stable	7026
1796	0.17164	4.04374	2.98986	0.00553865	0.0702775	-2.47232	220105_at	RSPH14	stable	27156
1797	0.238453	11.1052	2.98869	0.00555499	0.0703054	-2.47501	209009_at	ESD	stable	2098
1798	0.178697	3.43651	2.98859	0.00555632	0.0703054	-2.47523	1554199_at	PTPRO	stable	5800
1799	-0.316073	7.27475	-2.98851	0.00555738	0.0703054	-2.4754	209945_s_at	GSK3B	stable	2932
1800	-0.152091	3.56765	-2.98767	0.00556912	0.0704059	-2.47733	1552946_at	ZNF114	stable	163071
1801	-0.302857	10.6673	-2.98762	0.00556991	0.0704059	-2.47746	200866_s_at	PSAP	stable	5660
1802	-0.360788	3.36116	-2.98677	0.00558172	0.0705131	-2.47939	1552691_at	ARL11	stable	115761
1803	-0.742935	7.82995	-2.98636	0.00558754	0.0705703	-2.48034	200644_at	MARCKSL1	stable	65108
1804	0.247882	3.69702	2.98576	0.005596	0.0706445	-2.48173	206465_at	ACSBG1	stable	23205
1805	0.1658	7.83432	2.98216	0.00564673	0.071137	-2.48997	201671_x_at	USP14	stable	9097
1806	0.245051	5.34006	2.98059	0.005669	0.0713355	-2.49356	205252_at	ZNF174	stable	7727
1807	-0.546691	8.21799	-2.98037	0.00567206	0.0713575	-2.49406	219091_s_at	MMRN2	stable	79812
1808	0.238853	4.84186	2.98016	0.00567513	0.0713634	-2.49455	1569322_at	LINC00857	stable	439990
1809	-0.413553	4.00293	-2.97908	0.00569049	0.0714861	-2.49702	204470_at	CXCL1	stable	2919
1810	0.607764	5.64129	2.97877	0.00569494	0.0714992	-2.49773	219829_at	ITGB1BP2	stable	26548
1811	0.543752	5.4597	2.97774	0.00570966	0.0716492	-2.50009	214823_at	ZNF204P	stable	7754
1812	-0.210828	6.38589	-2.97521	0.00574599	0.0719071	-2.50588	203155_at	SETDB1	stable	9869
1813	-0.356903	6.49631	-2.97489	0.0057506	0.071939	-2.50661	204735_at	PDE4A	stable	5141
1814	0.340673	11.8538	2.97432	0.00575876	0.0720175	-2.50791	200665_s_at	SPARC	stable	6678
1815	0.295557	8.4672	2.97296	0.00577836	0.072213	-2.51101	226464_at	DIPK2A	stable	205428
1816	0.357744	6.96492	2.97236	0.00578713	0.0722592	-2.5124	203500_at	GCDH	stable	2639
1817	-0.800908	4.50633	-2.97234	0.00578735	0.0722592	-2.51243	204469_at	PTPRZ1	stable	5803
1818	0.205349	4.39361	2.97147	0.00579995	0.0724001	-2.51442	1559017_at	LOC100507351	stable	100507351
1819	-0.909249	6.46048	-2.96971	0.00582557	0.0726535	-2.51844	211650_x_at	IGK	stable	50802
1820	0.412492	7.58138	2.96853	0.0058429	0.0728198	-2.52115	225570_at	SLC41A1	stable	254428
1821	-0.135753	3.19735	-2.96825	0.00584694	0.0728536	-2.52178	1558691_a_at	DOCK4	stable	9732
1822	0.412038	7.9485	2.96643	0.00587365	0.0731364	-2.52594	1554126_at	MSRB3	stable	253827
1823	0.343667	5.41738	2.9663	0.00587554	0.0731433	-2.52623	220200_s_at	KMT5A	stable	387893
1824	0.214262	8.71247	2.9652	0.00589181	0.0732913	-2.52876	207812_s_at	GORASP2	stable	26003
1825	0.235566	8.72321	2.96427	0.00590547	0.0733736	-2.53087	203075_at	SMAD2	stable	4087
1826	-0.541549	6.89258	-2.96408	0.00590825	0.0733736	-2.5313	220027_s_at	RASIP1	stable	54922
1827	0.156736	3.27534	2.96375	0.00591316	0.0734016	-2.53206	220194_at	NSUN7	stable	79730
1828	-0.764266	6.43955	-2.96371	0.00591375	0.0734016	-2.53215	204236_at	FLI1	stable	2313
1829	0.156156	3.82781	2.96347	0.00591734	0.0734129	-2.53271	1561612_at	LINC02549	stable	101928280
1830	-0.21711	6.38883	-2.96263	0.00592972	0.0735331	-2.53461	221189_s_at	TARS2	stable	80222
1831	-0.226025	4.73459	-2.96119	0.00595116	0.0737154	-2.53791	210288_at	KLRG1	stable	10219
1832	0.304936	5.63961	2.96097	0.0059544	0.0737299	-2.5384	1554597_at	LIG3	stable	3980
1833	0.621275	6.9265	2.96002	0.00596861	0.0738467	-2.54058	204736_s_at	CSPG4	stable	1464
1834	-0.354765	7.14625	-2.95968	0.00597368	0.0738467	-2.54135	225530_at	MOB3A	stable	126308
1835	0.351517	4.30243	2.95966	0.00597393	0.0738467	-2.54139	1557146_a_at	SSTR5-AS1	stable	146336
1836	0.731855	6.69822	2.95957	0.00597527	0.0738467	-2.54159	228399_at	OSR1	stable	130497
1837	0.438364	4.47453	2.95623	0.00602546	0.0742154	-2.54923	203032_s_at	FH	stable	2271
1838	-0.391302	5.10942	-2.95554	0.00603586	0.0743267	-2.5508	204857_at	MAD1L1	stable	8379
1839	0.657098	6.79323	2.95525	0.00604025	0.074364	-2.55146	225539_at	ZBTB21	stable	49854
1840	-0.244439	5.78871	-2.95427	0.00605506	0.0744832	-2.5537	225124_at	PPP1R9B	stable	84687
1841	-0.281523	6.75372	-2.95417	0.00605655	0.0744832	-2.55392	223266_at	STRADB	stable	55437
1842	-0.237327	3.81618	-2.95388	0.00606082	0.0744999	-2.55456	210116_at	SH2D1A	stable	4068
1843	0.202459	9.98347	2.95334	0.00606904	0.0745069	-2.5558	200996_at	ACTR3	stable	10096
1844	0.318115	6.07919	2.9524	0.0060834	0.0745925	-2.55796	219310_at	SYNDIG1	stable	79953
1845	0.272952	8.40485	2.95237	0.00608374	0.0745925	-2.55801	202318_s_at	SENP6	stable	26054
1846	0.33528	4.86154	2.95085	0.00610695	0.0747886	-2.56148	205918_at	SLC4A3	stable	6508
1847	0.136592	3.39362	2.95068	0.00610953	0.0747886	-2.56186	1555397_at	MYO1D	stable	4642
1848	-0.252459	3.36479	-2.95049	0.00611241	0.0747886	-2.56229	204146_at	RAD51AP1	stable	10635
1849	0.299615	7.03943	2.94877	0.00613878	0.0750232	-2.56622	221771_s_at	MPHOSPH8	stable	54737
1850	-1.22957	6.44731	-2.94863	0.00614089	0.0750232	-2.56653	1555564_a_at	CFI	stable	3426
1851	-0.907224	6.37213	-2.94837	0.00614492	0.0750443	-2.56713	204007_at	FCGR3B	stable	2215
1852	-0.245325	6.9602	-2.94768	0.00615544	0.075156	-2.56869	221061_at	PKD2L1	stable	9033
1853	-0.380907	4.13996	-2.94485	0.00619907	0.0755648	-2.57513	207085_x_at	CSF2RA	stable	1438
1854	-0.300726	6.53734	-2.94465	0.00620216	0.0755648	-2.57559	201087_at	PXN	stable	5829
1855	0.342622	4.69254	2.94432	0.00620724	0.0755971	-2.57633	238454_at	ZNF540	stable	163255
1856	0.338697	8.28899	2.94411	0.00621055	0.0756094	-2.57682	225450_at	AMOTL1	stable	154810
1857	0.265274	7.18306	2.94345	0.00622074	0.0757167	-2.57831	212480_at	SPECC1L	stable	23384
1858	-0.377538	8.14965	-2.94257	0.00623447	0.075833	-2.58032	207843_x_at	CYB5A	stable	1528
1859	-0.680934	6.29015	-2.94192	0.00624462	0.0759295	-2.58181	219681_s_at	RAB11FIP1	stable	80223
1860	-0.189301	9.21002	-2.94188	0.00624517	0.0759295	-2.58189	218059_at	ZNF706	stable	51123
1861	-0.211201	7.32701	-2.9399	0.00627605	0.0761862	-2.58638	218335_x_at	TNIP2	stable	79155
1862	0.504544	8.87136	2.939	0.00629029	0.0763252	-2.58845	215785_s_at	CYFIP2	stable	26999
1863	0.714486	10.2449	2.93874	0.00629427	0.0763566	-2.58903	212670_at	ELN	stable	2006
1864	-0.275829	7.7735	-2.93793	0.00630706	0.0764779	-2.59088	214030_at	CRYBG3	stable	131544
1865	-0.497868	8.19176	-2.93676	0.00632544	0.0765991	-2.59353	202430_s_at	PLSCR1	stable	5359
1866	-0.45175	6.49449	-2.93652	0.00632915	0.0766031	-2.59406	220272_at	BNC2	stable	54796
1867	-0.356961	7.76455	-2.93647	0.00633	0.0766031	-2.59419	200961_at	SEPHS2	stable	22928
1868	0.541485	6.19349	2.93587	0.00633949	0.0766671	-2.59555	203890_s_at	DAPK3	stable	1613
1869	0.213439	7.96959	2.93509	0.00635188	0.076766	-2.59733	209018_s_at	PINK1	stable	65018
1870	0.40675	3.75108	2.93492	0.0063545	0.0767709	-2.59771	223667_at	FKBP7	stable	51661
1871	0.370632	4.67066	2.93462	0.00635919	0.0768034	-2.59838	206871_at	ELANE	stable	1991
1872	-0.624052	8.4066	-2.93328	0.00638054	0.0770395	-2.60143	1566342_at	SOD2	stable	6648
1873	0.218243	5.65427	2.93317	0.00638227	0.0770395	-2.60168	209246_at	ABCF2	stable	10061
1874	0.161693	4.53383	2.93299	0.00638508	0.0770395	-2.60208	228430_at	BOLA3-DT	stable	100507171
1875	-1.03883	8.01862	-2.93299	0.00638511	0.0770395	-2.60209	203535_at	S100A9	stable	6280
1876	-0.192752	3.23561	-2.93295	0.00638579	0.0770395	-2.60218	210279_at	GPR18	stable	2841
1877	-0.296975	5.40656	-2.93276	0.0063888	0.0770589	-2.60261	238055_at	LOC100505549	stable	100505549
1878	-0.328165	5.79222	-2.93162	0.00640704	0.0771813	-2.60521	205205_at	RELB	stable	5971
1879	0.427108	4.43244	2.93159	0.00640742	0.0771813	-2.60527	207119_at	PRKG1	stable	5592
1880	0.792674	7.64903	2.93119	0.00641391	0.0772123	-2.60619	1552455_at	PRUNE2	stable	158471
1881	0.235918	4.02393	2.93102	0.00641655	0.0772182	-2.60656	207786_at	CYP2R1	stable	120227
1882	-0.503008	8.40134	-2.93096	0.00641755	0.0772182	-2.60671	226722_at	FAM20C	stable	56975
1883	0.235948	6.09764	2.93077	0.00642057	0.0772205	-2.60713	221573_at	C7orf25	stable	79020
1884	-0.327192	6.72773	-2.93062	0.00642298	0.0772326	-2.60748	209417_s_at	IFI35	stable	3430
1885	0.301316	7.90601	2.93025	0.00642885	0.0772692	-2.60831	212017_at	FAM168B	stable	130074
1886	0.231755	4.60997	2.92931	0.00644387	0.0774157	-2.61043	243680_at	LOC100506476	stable	100506476
1887	-0.253432	6.96788	-2.92895	0.00644967	0.0774345	-2.61125	221734_at	PRRC1	stable	133619
1888	-0.146476	4.29456	-2.92829	0.00646034	0.0775283	-2.61276	206867_at	GCKR	stable	2646
1889	0.23157	8.28636	2.92609	0.00649572	0.0778333	-2.61774	225494_at	DYNLL2	stable	140735
1890	0.463347	5.4579	2.92567	0.00650256	0.0778923	-2.61869	218111_s_at	CMAS	stable	55907
1891	0.23446	4.88931	2.92561	0.00650349	0.0778923	-2.61882	205109_s_at	ARHGEF4	stable	50649
1892	-0.227541	5.07311	-2.92456	0.00652054	0.0779997	-2.62121	207067_s_at	HDC	stable	3067
1893	0.413204	6.49421	2.92447	0.00652196	0.0779997	-2.62141	207098_s_at	MFN1	stable	55669
1894	0.388093	4.49607	2.92416	0.00652703	0.0780375	-2.62212	204675_at	SRD5A1	stable	6715
1895	0.357874	7.52651	2.92344	0.00653875	0.0781435	-2.62375	205548_s_at	BTG3	stable	10950
1896	0.180039	3.89107	2.92313	0.00654389	0.0781877	-2.62447	236051_at	LOC105373085	stable	105373085
1897	0.429509	4.20356	2.92265	0.00655157	0.0782394	-2.62553	1554614_a_at	PTBP2	stable	58155
1898	-0.2548	8.8679	-2.9226	0.0065525	0.0782394	-2.62566	210514_x_at	HLA-G	stable	3135
1899	-0.515946	6.8465	-2.92232	0.00655704	0.0782557	-2.6263	204821_at	BTN3A3	stable	10384
1900	-0.265038	7.17749	-2.9219	0.00656395	0.0782557	-2.62725	218030_at	GIT1	stable	28964
1901	0.352067	5.70996	2.92171	0.00656699	0.0782557	-2.62768	223629_at	PCDHB5	stable	26167
1902	0.408057	7.11908	2.92169	0.00656727	0.0782557	-2.62771	225399_at	TSEN15	stable	116461
1903	0.211782	8.61456	2.92164	0.00656818	0.0782557	-2.62784	203156_at	AKAP11	stable	11215
1904	0.313573	4.5732	2.92063	0.00658467	0.0783497	-2.63013	1555609_a_at	ZMAT3	stable	64393
1905	-0.692517	7.42861	-2.91913	0.00660929	0.0785742	-2.63352	201656_at	ITGA6	stable	3655
1906	-0.485246	10.5749	-2.91892	0.0066127	0.0785933	-2.63399	211726_s_at	FMO2	stable	2327
1907	-0.817493	6.58365	-2.91884	0.00661403	0.0785933	-2.63418	206407_s_at	CCL13	stable	6357
1908	0.266711	9.93651	2.91848	0.00661991	0.0786321	-2.63499	200976_s_at	TAX1BP1	stable	8887
1909	0.358229	6.95326	2.91808	0.00662656	0.0786696	-2.6359	223852_s_at	STK40	stable	83931
1910	0.208471	4.1769	2.91803	0.00662738	0.0786696	-2.63601	230450_at	SEPTIN7-DT	stable	101928545
1911	0.327252	8.19245	2.91752	0.0066357	0.0787171	-2.63716	224820_at	COX20	stable	116228
1912	0.257796	6.80033	2.91738	0.00663804	0.0787277	-2.63748	212866_at	R3HCC1	stable	203069
1913	-0.130826	3.67421	-2.91651	0.00665245	0.0788132	-2.63945	219971_at	IL21R	stable	50615
1914	0.219154	3.83871	2.91613	0.00665877	0.078871	-2.64032	208305_at	PGR	stable	5241
1915	0.32546	5.3556	2.91567	0.00666632	0.0789432	-2.64135	238440_at	CLYBL	stable	171425
1916	-0.191796	9.83059	-2.91517	0.00667469	0.079024	-2.64249	207988_s_at	ARPC2	stable	10109
1917	-0.449491	10.5425	-2.9142	0.00669075	0.0791544	-2.64468	200989_at	HIF1A	stable	3091
1918	0.30732	4.54333	2.91304	0.00671009	0.079307	-2.64731	231750_at	PCDHB4	stable	56131
1919	0.674849	5.6158	2.9117	0.00673241	0.0795021	-2.65033	1562031_at	JAK2	stable	3717
1920	0.382119	4.07511	2.91127	0.00673953	0.0795519	-2.65129	236521_at	LOC105369889	stable	105369889
1921	0.313668	8.19252	2.91127	0.00673954	0.0795519	-2.65129	205105_at	MAN2A1	stable	4124
1922	0.130407	5.3778	2.91069	0.00674939	0.0796509	-2.65262	1569305_a_at	LINC01834	stable	107985280
1923	0.525423	5.0847	2.91014	0.0067585	0.0797413	-2.65385	1553175_s_at	PDE5A	stable	8654
1924	0.227187	8.95662	2.90956	0.00676824	0.079839	-2.65516	1554149_at	CLDND1	stable	56650
1925	0.577386	5.60733	2.90817	0.00679165	0.0800461	-2.65831	227875_at	KLHL13	stable	90293
1926	0.248816	7.66529	2.90755	0.00680221	0.0801186	-2.65972	225070_at	NUS1	stable	116150
1927	0.218442	7.38773	2.90591	0.00682986	0.0802727	-2.66341	225154_at	SYAP1	stable	94056
1928	-0.418925	7.78873	-2.90555	0.00683597	0.0803087	-2.66423	1555037_a_at	IDH1	stable	3417
1929	-0.14108	11.926	-2.90474	0.00684968	0.0804352	-2.66605	200663_at	CD63	stable	967
1930	0.474586	5.2114	2.90464	0.00685155	0.0804398	-2.6663	226096_at	FNDC5	stable	252995
1931	0.45074	5.16973	2.90403	0.00686182	0.0805086	-2.66766	218744_s_at	PACSIN3	stable	29763
1932	-0.513362	5.13967	-2.90301	0.0068792	0.0806184	-2.66996	219888_at	SPAG4	stable	6676
1933	0.46138	6.12355	2.90293	0.00688062	0.0806184	-2.67015	220240_s_at	TMCO3	stable	55002
1934	0.326887	7.38018	2.90275	0.00688375	0.0806274	-2.67056	209388_at	PAPOLA	stable	10914
1935	-0.230719	6.92596	-2.90243	0.00688915	0.0806735	-2.67128	204080_at	TOE1	stable	114034
1936	-0.210662	3.87924	-2.90067	0.00691929	0.0809474	-2.67525	221388_at	OR1A1	stable	8383
1937	-0.284352	7.50478	-2.90063	0.00691995	0.0809474	-2.67534	226768_at	GIGYF1	stable	64599
1938	-0.356479	12.0051	-2.90004	0.00693018	0.0810497	-2.67668	213377_x_at	RPS12	stable	6206
1939	0.455697	8.56784	2.8988	0.00695148	0.0812294	-2.67947	202825_at	SLC25A4	stable	291
1940	0.381042	7.27023	2.89788	0.00696733	0.0813654	-2.68155	218185_s_at	ARMC1	stable	55156
1941	-0.256307	5.82696	-2.89705	0.00698174	0.0814506	-2.68343	221810_at	RAB15	stable	376267
1942	-0.181837	4.17356	-2.89691	0.00698405	0.0814506	-2.68373	1560706_at	NEDD9	stable	4739
1943	-0.222905	4.13384	-2.89665	0.00698866	0.0814506	-2.68433	228601_at	HAGLR	stable	401022
1944	0.238499	7.75257	2.89627	0.00699521	0.081467	-2.68518	208066_s_at	GTF2B	stable	2959
1945	0.323432	4.42024	2.89609	0.00699831	0.081467	-2.68558	207797_s_at	LRP2BP	stable	55805
1946	0.878138	6.85626	2.89591	0.00700143	0.081467	-2.68599	206012_at	LEFTY2	stable	7044
1947	0.177338	10.2153	2.8959	0.00700161	0.081467	-2.68601	217883_at	MMADHC	stable	27249
1948	0.202917	12.0643	2.8958	0.00700329	0.0814691	-2.68623	212082_s_at	MYL6	stable	4637
1949	0.243411	7.82211	2.89528	0.00701244	0.0815152	-2.68742	214077_x_at	MEIS3P1	stable	4213
1950	0.326247	7.74032	2.89523	0.00701322	0.0815152	-2.68752	218449_at	UFSP2	stable	55325
1951	-1.10273	9.26567	-2.89486	0.00701962	0.081555	-2.68835	216598_s_at	CCL2	stable	6347
1952	0.158346	3.76152	2.89439	0.00702784	0.0816331	-2.68941	231386_at	FAM228A	stable	653140
1953	0.302259	5.61	2.89386	0.00703708	0.0816884	-2.69061	228144_at	ZNF300	stable	91975
1954	0.37314	5.93175	2.89364	0.00704087	0.0817005	-2.6911	206308_at	TRDMT1	stable	1787
1955	-0.33663	4.83992	-2.89293	0.00705339	0.0817909	-2.69271	228799_at	NCK1-DT	stable	101927597
1956	-0.677949	5.8765	-2.89263	0.00705857	0.0817974	-2.69338	204513_s_at	ELMO1	stable	9844
1957	0.244955	9.1777	2.89154	0.00707764	0.0819505	-2.69584	217742_s_at	WAC	stable	51322
1958	0.201928	5.30345	2.88996	0.00710534	0.0821202	-2.69939	1569973_at	SEPTIN7P2	stable	641977
1959	-0.286424	6.38	-2.88994	0.00710582	0.0821202	-2.69945	227570_at	TMEM86A	stable	144110
1960	-0.228565	5.48174	-2.88935	0.0071161	0.0821868	-2.70076	207015_s_at	ALDH1A2	stable	8854
1961	0.16808	11.1071	2.88779	0.00714358	0.082253	-2.70427	209075_s_at	ISCU	stable	23479
1962	0.31003	5.64572	2.88778	0.00714385	0.082253	-2.7043	205074_at	SLC22A5	stable	6584
1963	-0.532109	7.21528	-2.88775	0.00714439	0.082253	-2.70437	218638_s_at	SPON2	stable	10417
1964	0.271026	6.69833	2.8876	0.00714708	0.0822667	-2.70472	226528_at	MTX3	stable	345778
1965	-0.345009	5.60811	-2.88697	0.00715826	0.0823434	-2.70614	218921_at	SIGIRR	stable	59307
1966	0.520641	4.69093	2.88685	0.00716024	0.0823487	-2.70639	1555976_s_at	MYL12A	stable	10627
1967	1.01607	8.07608	2.88481	0.00719647	0.0826437	-2.71098	207148_x_at	MYOZ2	stable	51778
1968	0.185353	5.69053	2.8846	0.00720026	0.0826542	-2.71146	206709_x_at	GPT	stable	2875
1969	0.107643	3.01285	2.88428	0.00720606	0.0826845	-2.71219	1555517_at	GABRG3	stable	2567
1970	-0.662752	6.21259	-2.88415	0.00720836	0.0826897	-2.71248	218113_at	CEMIP2	stable	23670
1971	-0.287292	7.86302	-2.88204	0.00724602	0.0828951	-2.71722	221688_s_at	IMP3	stable	55272
1972	-0.220251	8.75255	-2.88143	0.00725706	0.0829736	-2.7186	225331_at	CCDC50	stable	152137
1973	-0.348854	5.14643	-2.88118	0.00726149	0.0829895	-2.71915	203971_at	SLC31A1	stable	1317
1974	-0.268196	9.27958	-2.88	0.0072827	0.0831971	-2.72181	209043_at	PAPSS1	stable	9061
1975	-0.202557	4.89863	-2.87965	0.00728896	0.0832513	-2.72259	203921_at	CHST2	stable	9435
1976	-0.746368	7.41619	-2.87929	0.00729552	0.0832914	-2.7234	218625_at	NRN1	stable	51299
1977	-0.357972	8.08411	-2.87734	0.00733072	0.0835014	-2.72778	218005_at	ZNF22	stable	7570
1978	-0.676265	5.93738	-2.87711	0.00733499	0.0835117	-2.72831	227609_at	EPSTI1	stable	94240
1979	0.903012	6.94872	2.87704	0.0073362	0.0835117	-2.72846	202222_s_at	DES	stable	1674
1980	-0.128818	3.82768	-2.87552	0.00736386	0.083714	-2.73188	1553734_at	AK7	stable	122481
1981	-0.452446	6.80059	-2.87545	0.00736503	0.083714	-2.73202	209281_s_at	ATP2B1	stable	490
1982	-0.51449	7.77926	-2.87544	0.00736517	0.083714	-2.73204	212956_at	TBC1D9	stable	23158
1983	0.384844	7.5057	2.87539	0.00736621	0.083714	-2.73217	1556034_s_at	MTMR11	stable	10903
1984	-0.322414	6.47342	-2.87516	0.00737032	0.0837258	-2.73268	204166_at	SBNO2	stable	22904
1985	0.951743	7.04199	2.87469	0.00737892	0.0837887	-2.73374	229831_at	CNTN3	stable	5067
1986	0.220631	7.40406	2.87409	0.00738987	0.0838956	-2.73508	226758_at	LUC7L2	stable	51631
1987	0.126174	3.6839	2.87338	0.00740291	0.0840262	-2.73669	1565836_at	MAP3K9-DT	stable	100506411
1988	0.187006	4.12811	2.87321	0.00740601	0.0840439	-2.73707	203684_s_at	BCL2	stable	596
1989	0.341319	4.77131	2.8728	0.00741352	0.0841117	-2.73799	223498_at	SPECC1	stable	92521
1990	0.619288	7.25714	2.87229	0.00742284	0.0841825	-2.73913	223749_at	C1QTNF2	stable	114898
1991	0.283458	10.503	2.87194	0.00742927	0.0842379	-2.73992	225132_at	FBXL3	stable	26224
1992	-0.316724	4.29329	-2.87174	0.00743294	0.0842446	-2.74036	214936_at	LRCH1	stable	23143
1993	0.574368	6.40309	2.87112	0.00744432	0.084345	-2.74175	205577_at	PYGM	stable	5837
1994	0.472577	7.36228	2.87073	0.00745136	0.0843693	-2.74261	220032_at	CPED1	stable	79974
1995	0.220762	6.71463	2.86982	0.00746821	0.0845217	-2.74467	218837_s_at	UBE2D4	stable	51619
1996	0.619003	8.77845	2.8693	0.00747776	0.0846122	-2.74583	206766_at	ITGA10	stable	8515
1997	0.534324	4.91805	2.86873	0.00748842	0.0846804	-2.74712	214764_at	RRP15	stable	51018
1998	-0.261851	5.85013	-2.8681	0.00750001	0.0847763	-2.74853	226121_at	DHRS13	stable	147015
[truncated: 18,868 more rows]

## Sheet: Supplement 4
The DEGs in GSE54666 dataset
	logFC	AveExpr	t	P.Value	adj.P.Val	B	probe_id	symbol	change	ENTREZID
1	-3.06647	9.70966	-21.9206	6.77e-12	1.6e-07	14.7449	ILMN_2053415	LDLR	down	3949
2	2.42577	10.1931	18.2725	7.22e-11	1.14e-06	13.3712	ILMN_1713124	AKR1C3	up	8644
3	-1.12714	8.71922	-14.4608	1.44e-09	8.11e-06	11.328	ILMN_1755974	ALDOC	down	230
4	1.077	7.81628	14.4176	1.5e-09	8.11e-06	11.3001	ILMN_2165993	ITLN1	up	55600
5	-2.03199	9.15208	-13.7964	2.62e-09	1.06e-05	10.8856	ILMN_1772241	SQLE	down	6713
6	0.77657	12.2818	13.7829	2.65e-09	1.06e-05	10.8763	ILMN_1670145	GSDME	up	1687
7	-2.35005	9.83319	-13.7649	2.69e-09	1.06e-05	10.8639	ILMN_1689842	MSMO1	down	6307
8	1.24002	11.0669	13.4086	3.74e-09	1.26e-05	10.6131	ILMN_1704531	PTGR1	up	22949
9	1.45817	12.9353	13.0127	5.45e-09	1.71e-05	10.3233	ILMN_1773006	FABP4	up	2167
10	-1.10315	8.53607	-11.3793	2.86e-08	6.44e-05	8.99171	ILMN_1705686	NRGN	down	4900
11	-1.53827	10.1332	-11.2279	3.37e-08	7.24e-05	8.85612	ILMN_1797728	HMGCS1	down	3157
12	-1.3964	10.1766	-10.8815	4.94e-08	9.72e-05	8.53756	ILMN_1657395	HMGCR	down	3156
13	-1.30309	10.0306	-10.2478	1.02e-07	0.000185007	7.92274	ILMN_1741096	FDFT1	down	2222
14	-1.68158	10.1715	-10.0985	1.21e-07	0.000204788	7.77166	ILMN_1670134	FADS1	down	3992
15	-1.21844	9.2117	-10.0115	1.35e-07	0.000219267	7.6824	ILMN_1733276	CYSLTR1	down	10800
16	-0.626244	9.61463	-9.49377	2.53e-07	0.000355403	7.13357	ILMN_1692163	NSDHL	down	50814
17	-0.75911	8.26068	-9.48395	2.56e-07	0.000355403	7.12285	ILMN_1657550	MVD	down	4597
18	1.33451	9.06006	9.4284	2.74e-07	0.00036998	7.06201	ILMN_1658926	NOTCH3	up	4854
19	1.5206	10.1524	9.39878	2.85e-07	0.000373266	7.02943	ILMN_1792455	TMEM158	up	25907
20	-1.38937	8.93259	-9.17244	3.79e-07	0.000483328	6.77685	ILMN_2145116	STING1	down	340061
21	-1.18494	8.95596	-9.10524	4.13e-07	0.000512806	6.70063	ILMN_1710962	TMEM97	down	27346
22	1.05814	9.23425	9.0319	4.53e-07	0.000549037	6.61682	ILMN_2227248	SLAMF9	up	89886
23	-0.916092	8.53038	-8.96992	4.91e-07	0.000579951	6.54545	ILMN_1698952	TNFRSF11A	down	8792
24	0.834582	9.73218	8.70047	6.99e-07	0.000764852	6.22944	ILMN_1662973	CD82	up	3732
25	-0.990513	9.72938	-8.68564	7.13e-07	0.000764852	6.21177	ILMN_2073604	EBP	down	10682
26	0.670963	10.3853	8.63861	7.59e-07	0.000764852	6.15555	ILMN_1790973	CDS2	up	8760
27	-0.771249	8.78487	-8.63769	7.6e-07	0.000764852	6.15445	ILMN_1804248	FDPS	down	2224
28	0.424481	9.42117	8.48301	9.35e-07	0.000901125	5.96745	ILMN_1670096	NRBP1	stable	29959
29	0.833477	10.4029	8.42796	1.01e-06	0.000951332	5.90012	ILMN_1651769	ZFYVE16	up	9765
30	-2.9338	10.5492	-8.32301	1.16e-06	0.00101769	5.77063	ILMN_1717163	F13A1	down	2162
31	-0.555331	9.64613	-8.32187	1.16e-06	0.00101769	5.76922	ILMN_1763228	MEF2D	down	4209
32	0.586918	10.3889	8.28738	1.22e-06	0.0010475	5.72633	ILMN_1805225	LPCAT3	up	10162
33	0.917106	11.9623	8.26308	1.26e-06	0.00106369	5.69601	ILMN_1720282	NQO1	up	1728
34	-0.396188	8.95974	-8.15722	1.46e-06	0.00118857	5.56299	ILMN_1785252	SLC26A6	stable	65010
35	0.728869	9.85374	8.11587	1.55e-06	0.00123747	5.51062	ILMN_1736939	UGCG	up	7357
36	-1.53436	8.77896	-8.06726	1.65e-06	0.00130216	5.44873	ILMN_1686989	INSIG1	down	3638
37	1.35236	10.9021	7.96442	1.91e-06	0.00147961	5.31671	ILMN_1694757	CTSL	up	1514
38	-0.455188	7.89841	-7.89417	2.11e-06	0.00158216	5.22567	ILMN_1655261	ERP27	stable	121506
39	1.03769	10.2886	7.87324	2.17e-06	0.00160437	5.19842	ILMN_1662619	TFPI	up	7035
40	-0.7429	7.69197	-7.83066	2.31e-06	0.00164568	5.14276	ILMN_1733811	JUP	down	3728
41	-1.1332	8.4603	-7.81401	2.37e-06	0.00164568	5.12093	ILMN_1815626	DHCR7	down	1717
42	0.827291	9.56895	7.79685	2.42e-06	0.00165921	5.09839	ILMN_1656378	NMT2	up	9397
43	0.693105	11.8158	7.67945	2.87e-06	0.00186961	4.94301	ILMN_1727309	RMDN3	up	55177
44	-1.323	10.1867	-7.67397	2.89e-06	0.00186961	4.93571	ILMN_1755075	IDI1	down	3422
45	-1.01171	7.85989	-7.66219	2.94e-06	0.00186961	4.92	ILMN_2075065	FADS2	down	9415
46	0.559676	12.2736	7.65711	2.96e-06	0.00186961	4.91322	ILMN_2098743	ACOT13	up	55856
47	0.545352	9.5167	7.65584	2.97e-06	0.00186961	4.91153	ILMN_1670304	FAM156A	up	29057
48	1.06738	8.77265	7.6134	3.16e-06	0.00196204	4.85473	ILMN_1736982	PHACTR1	up	221692
49	0.437913	7.72728	7.59579	3.24e-06	0.00198676	4.83108	ILMN_1654204	DNAJC5B	stable	85479
50	-0.852399	9.73879	-7.57662	3.33e-06	0.00199124	4.80528	ILMN_2112988	NCF1C	down	654817
51	-1.04221	8.63631	-7.54891	3.47e-06	0.00204744	4.7679	ILMN_1742544	MEF2C	down	4208
52	-0.375283	13.2638	-7.51164	3.66e-06	0.00209175	4.71744	ILMN_1756360	RPL35A	stable	6165
53	-0.682989	7.69574	-7.5024	3.71e-06	0.00209175	4.7049	ILMN_1750003	CD200R1	down	131450
54	0.535425	13.7507	7.47905	3.84e-06	0.00213457	4.67315	ILMN_1674038	CTSD	up	1509
55	-1.41777	10.0559	-7.40642	4.28e-06	0.0023246	4.57389	ILMN_1725510	DHCR24	down	1718
56	-0.919099	10.3146	-7.40538	4.28e-06	0.0023246	4.57246	ILMN_1697309	NCF1	down	653361
57	-0.610364	8.4868	-7.37744	4.46e-06	0.00234198	4.53406	ILMN_1654518	SAP25	down	100316904
58	0.924477	12.1516	7.36997	4.51e-06	0.00234204	4.52377	ILMN_1814022	NR1H3	up	10062
59	2.6596	11.3113	7.34119	4.71e-06	0.00241769	4.48406	ILMN_1801077	PLIN2	up	123
60	-0.783985	9.2708	-7.33212	4.77e-06	0.00242417	4.47152	ILMN_1804419	IRAG2	down	4033
61	0.956433	12.2509	7.30526	4.97e-06	0.00249623	4.43432	ILMN_1717056	TXNRD1	up	7296
62	-1.038	9.72696	-7.27552	5.19e-06	0.0025552	4.39299	ILMN_1800626	SESN1	down	27244
63	-0.668629	12.6896	-7.23726	5.5e-06	0.0025976	4.33963	ILMN_1808707	FSCN1	down	6624
64	0.34574	9.89564	7.21454	5.69e-06	0.00266109	4.30784	ILMN_1652505	APEX2	stable	27301
65	0.580546	7.99964	7.15864	6.19e-06	0.00281869	4.22929	ILMN_1810584	IL1R1	up	3554
66	1.22307	10.0266	7.14646	6.31e-06	0.00281869	4.21212	ILMN_3307791	DIPK1A	up	388650
67	0.633511	8.93049	7.14431	6.33e-06	0.00281869	4.20907	ILMN_1667564	ALDH3A2	up	224
68	-1.65126	10.4052	-7.13578	6.41e-06	0.00281985	4.19703	ILMN_1669409	VSIG4	down	11326
69	0.687621	10.3601	7.1104	6.66e-06	0.00285925	4.16112	ILMN_1685012	EAF1	up	85403
70	-1.28575	9.40514	-7.07383	7.04e-06	0.00299529	4.10921	ILMN_1807925	GNG2	down	54331
71	1.22598	12.0349	7.05822	7.21e-06	0.0030399	4.08699	ILMN_1796349	SMPDL3A	up	10924
72	0.677682	9.60926	7.03515	7.47e-06	0.00312084	4.05409	ILMN_1672759	MCU	up	90550
73	-1.46395	9.16174	-7.02075	7.63e-06	0.003121	4.0335	ILMN_1723035	OLR1	down	4973
74	0.579829	13.383	7.01796	7.67e-06	0.003121	4.02951	ILMN_1737308	GLRX	up	2745
75	0.568961	9.53186	7.00697	7.8e-06	0.00314678	4.01377	ILMN_1721247	KRT75	up	9119
76	-1.68702	8.18335	-6.99876	7.89e-06	0.00314962	4.002	ILMN_1675191	GAPT	down	202309
77	1.36112	8.98093	6.9953	7.94e-06	0.00314962	3.99705	ILMN_1703946	ADORA2B	up	136
78	0.596577	9.23933	6.92576	8.83e-06	0.00347543	3.89693	ILMN_1673586	SLC6A6	up	6533
79	-0.916812	10.4857	-6.88541	9.4e-06	0.00363807	3.8385	ILMN_1688373	LST1	down	7940
80	0.672556	11.8609	6.86723	9.67e-06	0.00371141	3.81209	ILMN_1713505	NPC1	up	4864
81	1.04142	9.63722	6.84351	1e-05	0.00378877	3.77756	ILMN_1762529	SLC12A8	up	84561
82	-0.466086	7.61288	-6.82818	1.03e-05	0.00384925	3.75519	ILMN_1724422	SELL	stable	6402
83	-0.890634	8.69059	-6.81455	1.05e-05	0.00390069	3.73528	ILMN_1695590	ADRB2	down	154
84	-0.905227	10.7678	-6.80406	1.07e-05	0.00393393	3.71993	ILMN_1784871	FASN	down	2194
85	0.543996	10.4136	6.78027	1.11e-05	0.00399978	3.68506	ILMN_2204876	FLVCR2	up	55640
86	0.82865	10.7705	6.77191	1.12e-05	0.00399978	3.67279	ILMN_1785821	TDP2	up	51567
87	-0.379583	12.7039	-6.77105	1.12e-05	0.00399978	3.67153	ILMN_1727402	HCLS1	stable	3059
88	1.45599	8.66898	6.77028	1.12e-05	0.00399978	3.67041	ILMN_1655229	SLC7A11	up	23657
89	-0.708069	9.77676	-6.76883	1.13e-05	0.00399978	3.66826	ILMN_1767365	PAK1	down	5058
90	0.490649	7.63329	6.74341	1.17e-05	0.00408199	3.63087	ILMN_1810374	TMEM156	stable	80008
91	0.402693	13.1235	6.73191	1.19e-05	0.00408199	3.61392	ILMN_1683146	FTH1	stable	2495
92	-0.650265	11.8181	-6.71989	1.22e-05	0.00410217	3.59618	ILMN_1804277	SPRED1	down	161742
93	-0.799758	8.04643	-6.66858	1.32e-05	0.00435336	3.52019	ILMN_2141482	SERPINF1	down	5176
94	0.589041	9.49229	6.65352	1.35e-05	0.00439638	3.49782	ILMN_1658425	DAG1	up	1605
95	-0.755775	11.6295	-6.64009	1.38e-05	0.00442942	3.47784	ILMN_1702301	DOCK10	down	55619
96	-1.17977	8.86984	-6.5733	1.53e-05	0.00482507	3.37801	ILMN_1677038	CPED1	down	79974
97	-0.480402	7.82323	-6.54682	1.6e-05	0.00496396	3.33825	ILMN_1691339	CLEC1A	stable	51267
98	-0.470059	7.88961	-6.54299	1.61e-05	0.00496396	3.33249	ILMN_2115633	CD320	stable	51293
99	1.00651	8.82188	6.48118	1.77e-05	0.00539234	3.2392	ILMN_1767934	PCSK5	up	5125
100	-1.44427	10.617	-6.47897	1.78e-05	0.00539234	3.23586	ILMN_1693009	FGL2	down	10875
101	-0.517448	7.82804	-6.46086	1.83e-05	0.0054495	3.2084	ILMN_1786310	MVK	down	4598
102	-0.754972	10.8468	-6.46005	1.84e-05	0.0054495	3.20717	ILMN_1803560	LAT2	down	7462
103	0.371925	11.1457	6.42664	1.94e-05	0.00558701	3.15639	ILMN_1729533	NAXE	stable	128240
104	0.696815	8.30927	6.42569	1.94e-05	0.00558701	3.15495	ILMN_1699357	SLC22A5	up	6584
105	-0.385229	7.59875	-6.40475	2.01e-05	0.00570888	3.12303	ILMN_1781431	GLCCI1	stable	113263
106	0.415343	7.75108	6.39568	2.04e-05	0.00572398	3.10918	ILMN_1672608	PLPP3	stable	8613
107	0.367507	12.6226	6.35062	2.19e-05	0.00601299	3.04018	ILMN_3193306	TMEM251	stable	26175
108	0.463028	8.47668	6.34295	2.22e-05	0.00605287	3.02841	ILMN_1809417	LRFN4	stable	78999
109	0.317053	10.9758	6.33616	2.24e-05	0.00608467	3.01798	ILMN_1653856	UBASH3B	stable	84959
110	0.503289	8.34074	6.33141	2.26e-05	0.00609661	3.01068	ILMN_2111932	SERINC2	up	347735
111	0.868853	8.53239	6.29423	2.4e-05	0.00643913	2.95341	ILMN_1806434	PAQR5	up	54852
112	0.611742	12.4866	6.28351	2.44e-05	0.00651537	2.93686	ILMN_1806408	ACADVL	up	37
113	-0.372401	11.3991	-6.24302	2.61e-05	0.00684407	2.87416	ILMN_1661886	APEX1	stable	328
114	-0.859317	9.27905	-6.23754	2.63e-05	0.00686429	2.86565	ILMN_1676372	CD209	down	30835
115	0.742597	11.8318	6.23287	2.65e-05	0.00686429	2.85841	ILMN_1691508	PLAUR	up	5329
116	0.337742	13.3378	6.22447	2.69e-05	0.00690131	2.84536	ILMN_1741003	ANXA5	stable	308
117	0.436197	8.15927	6.21893	2.71e-05	0.00692653	2.83674	ILMN_1655296	UTRN	stable	7402
118	0.640407	10.7083	6.14841	3.05e-05	0.00770492	2.72668	ILMN_1781536	FAH	up	2184
119	-0.544044	11.8578	-6.13844	3.1e-05	0.00773581	2.71105	ILMN_1726245	TGFBR2	down	7048
120	0.586706	10.4982	6.13646	3.11e-05	0.00773581	2.70795	ILMN_1775182	GSR	up	2936
121	0.319844	7.77436	6.1354	3.11e-05	0.00773581	2.70629	ILMN_1729791	UBQLN4	stable	56893
122	0.479656	8.63156	6.10654	3.26e-05	0.00799346	2.66096	ILMN_1679782	BLOC1S2	stable	282991
123	-0.51443	11.019	-6.10346	3.28e-05	0.00799346	2.65612	ILMN_1747622	CD33	down	945
124	0.55146	9.55183	6.09982	3.3e-05	0.00799346	2.65038	ILMN_1719867	RNF13	up	11342
125	-0.647544	7.79932	-6.0923	3.34e-05	0.00803594	2.63854	ILMN_1670379	ANTXR1	down	84168
126	0.475953	13.103	6.08707	3.37e-05	0.00803594	2.63031	ILMN_1794165	PGD	stable	5226
127	0.43222	10.8603	6.08434	3.39e-05	0.00803594	2.626	ILMN_1790650	CEP20	stable	123811
128	0.421417	8.57456	6.07366	3.45e-05	0.00813838	2.60916	ILMN_1793549	PTPN4	stable	5775
129	-0.405089	8.87309	-6.05619	3.55e-05	0.00829451	2.58157	ILMN_1708798	EAF2	stable	55840
130	0.682087	12.7322	6.02889	3.71e-05	0.00855234	2.53835	ILMN_1696302	FABP5	up	2171
131	-0.353391	8.33627	-6.01674	3.79e-05	0.00868453	2.51909	ILMN_1773868	ZRSR2	stable	8233
132	-0.728409	9.77148	-6.00842	3.84e-05	0.00876318	2.50587	ILMN_1812940	TRMT1	down	55621
133	-0.261694	7.44338	-5.9941	3.93e-05	0.00893177	2.48311	ILMN_1793672	SIX5	stable	147912
134	0.821658	13.1876	5.96431	4.13e-05	0.00929783	2.43566	ILMN_1766054	ABCA1	up	19
135	-0.487126	8.62176	-5.95541	4.2e-05	0.0093229	2.42146	ILMN_1688098	TBC1D4	stable	9882
136	-0.501019	9.66543	-5.9533	4.21e-05	0.0093229	2.41809	ILMN_1721626	ARID5B	down	84159
137	-0.512248	8.42057	-5.95246	4.22e-05	0.0093229	2.41675	ILMN_1739942	FAM117B	down	150864
138	-0.500088	7.59497	-5.95142	4.22e-05	0.0093229	2.41509	ILMN_2233783	CD38	down	952
139	-0.963044	11.478	-5.93474	4.34e-05	0.00943475	2.38843	ILMN_1668559	RGS10	down	6001
140	1.03408	8.75419	5.9344	4.35e-05	0.00943475	2.38789	ILMN_3209232	CTSLP8	up	1518
141	0.942446	8.49704	5.91697	4.48e-05	0.00965154	2.35997	ILMN_1664094	P2RY13	up	53829
142	-0.608606	8.31958	-5.90409	4.57e-05	0.00981769	2.33932	ILMN_1690040	TM7SF2	down	7108
143	-1.50123	9.04441	-5.8973	4.63e-05	0.0098409	2.32843	ILMN_1735764	HTR2B	down	3357
144	-1.04329	9.80575	-5.87504	4.8e-05	0.0100902	2.29265	ILMN_1729180	GATM	down	2628
145	-0.405826	8.75949	-5.87125	4.83e-05	0.0101001	2.28654	ILMN_1802106	APOBEC3G	stable	60489
146	-0.414331	9.43617	-5.86553	4.88e-05	0.0101529	2.27733	ILMN_1756595	SH3TC1	stable	54436
147	-0.746602	11.594	-5.85746	4.95e-05	0.0102141	2.26433	ILMN_1709204	CLEC4A	down	50856
148	0.502516	12.3553	5.85676	4.95e-05	0.0102141	2.2632	ILMN_1676336	NCEH1	up	57552
149	-0.827323	8.47856	-5.85209	4.99e-05	0.0102503	2.25567	ILMN_2230566	RAB40B	down	10966
150	-0.633954	8.10483	-5.84294	5.07e-05	0.0102768	2.24091	ILMN_1692080	ANKH	down	56172
151	-0.53519	10.5045	-5.84288	5.07e-05	0.0102768	2.24081	ILMN_1683950	SNX11	down	29916
152	0.543089	8.78171	5.83542	5.13e-05	0.0103626	2.22877	ILMN_1741389	B3GNT8	up	374907
153	0.384709	8.04293	5.82181	5.25e-05	0.0104696	2.20677	ILMN_1736327	CDC42EP3	stable	10602
154	0.542361	13.3852	5.814	5.32e-05	0.0105202	2.19413	ILMN_1701195	PLA2G7	up	7941
155	-0.523253	11.1909	-5.80125	5.44e-05	0.0106606	2.17348	ILMN_1671554	LPIN1	down	23175
156	0.440137	9.42786	5.78855	5.56e-05	0.010803	2.15288	ILMN_1778161	DNAJC25	stable	548645
157	-1.03593	10.71	-5.75924	5.84e-05	0.0110734	2.10527	ILMN_1783956	ATP8B4	down	79895
158	0.418008	9.80686	5.75813	5.85e-05	0.0110734	2.10347	ILMN_1666004	WASL	stable	8976
159	-0.981082	9.21459	-5.75739	5.86e-05	0.0110734	2.10226	ILMN_1664718	CYP51A1	down	1595
160	-0.848819	9.46233	-5.75727	5.86e-05	0.0110734	2.10206	ILMN_2145280	DEF6	down	50619
161	-0.482829	8.35048	-5.74921	5.94e-05	0.0111395	2.08895	ILMN_1790100	DDIAS	stable	220042
162	-0.38908	8.56313	-5.74909	5.94e-05	0.0111395	2.08874	ILMN_2180371	FAM216A	stable	29902
163	0.706286	12.467	5.7463	5.97e-05	0.0111481	2.08421	ILMN_1699695	TNFRSF21	up	27242
164	-1.04727	10.3766	-5.73176	6.12e-05	0.0113827	2.0605	ILMN_1758315	SLC9A9	down	285195
165	-0.654746	7.77467	-5.72583	6.18e-05	0.0114087	2.05081	ILMN_1749878	FAM124B	down	79843
166	-0.384808	10.5093	-5.70854	6.37e-05	0.0116423	2.02257	ILMN_2224833	ADIPOR2	stable	79602
167	0.949516	8.25741	5.70711	6.38e-05	0.0116423	2.02025	ILMN_1676213	SRPX2	up	27286
168	-0.882613	13.4522	-5.6946	6.52e-05	0.0117722	1.99976	ILMN_1785071	SELENOP	down	6414
169	-1.15905	10.7095	-5.69396	6.53e-05	0.0117722	1.99873	ILMN_1696591	RB1	down	5925
170	-0.642266	7.77297	-5.68522	6.63e-05	0.011892	1.98441	ILMN_1716224	STARD4	down	134429
171	-0.84683	12.4046	-5.68175	6.67e-05	0.011892	1.97873	ILMN_1697448	TXNIP	down	10628
172	0.485842	7.91016	5.6813	6.67e-05	0.011892	1.97799	ILMN_1653028	COL4A1	stable	1282
173	0.660713	9.34759	5.6517	7.02e-05	0.0123374	1.9294	ILMN_1684368	SMIM3	up	85027
174	0.755702	11.8553	5.64811	7.06e-05	0.0123374	1.92349	ILMN_1717326	SLC29A3	up	55315
175	0.626613	13.3465	5.64775	7.07e-05	0.0123374	1.92291	ILMN_1704985	CYP27A1	up	1593
176	0.902915	11.0281	4.45374	0.000603263	0.0491253	-0.143148	ILMN_1686623	CSF1R	up	1436
177	0.89873	10.3497	5.64464	7.11e-05	0.0123374	1.91779	ILMN_1784553	SDC2	up	6383
178	-0.451508	7.67853	-5.64068	7.15e-05	0.012376	1.91128	ILMN_1656818	GPR141	stable	353345
179	1.15863	10.2349	5.62971	7.29e-05	0.0125654	1.89322	ILMN_1815023	PIM1	up	5292
180	-0.259996	11.5269	-5.61727	7.45e-05	0.012763	1.87272	ILMN_1758918	BRD2	stable	6046
181	0.304849	9.92289	5.6164	7.46e-05	0.012763	1.87129	ILMN_1760855	OCRL	stable	4952
182	-0.366856	7.80683	-5.58334	7.9e-05	0.0133656	1.81669	ILMN_1745927	TGFBR1	stable	7046
183	1.08804	9.18282	5.5572	8.26e-05	0.0138119	1.77338	ILMN_1695475	SEMA3C	up	10512
184	-0.579894	9.31241	-5.55608	8.28e-05	0.0138119	1.77153	ILMN_1683023	PDGFC	down	56034
185	-0.274068	12.8314	-5.5479	8.39e-05	0.0139102	1.75797	ILMN_1760714	RPS3	stable	6188
186	-0.715103	8.17202	-5.54565	8.43e-05	0.0139157	1.75422	ILMN_1701911	DCANP1	down	140947
187	0.969682	10.7149	5.54165	8.48e-05	0.0139634	1.74759	ILMN_1697559	G6PD	up	2539
188	-0.417441	7.88318	-5.52507	8.73e-05	0.0142243	1.72004	ILMN_1696933	NLRP3	stable	114548
189	-1.07625	9.518	-5.52496	8.73e-05	0.0142243	1.71985	ILMN_2101278	RGS18	down	64407
190	0.314696	7.28367	5.49661	9.17e-05	0.0148391	1.67264	ILMN_1696434	LAMA1	stable	284217
191	-0.52873	11.1722	-5.49007	9.28e-05	0.0149574	1.66173	ILMN_1666967	MPC1	down	51660
192	0.522784	8.50199	5.46877	9.63e-05	0.0153576	1.62617	ILMN_1679267	TGM2	up	7052
193	-0.409858	7.79325	-5.46709	9.66e-05	0.0153576	1.62336	ILMN_1719870	FAM72D	stable	728833
194	-0.571259	7.59078	-5.45516	9.86e-05	0.0156273	1.60341	ILMN_1714709	OLFM1	down	10439
195	0.423585	10.5203	5.45249	9.91e-05	0.0156477	1.59894	ILMN_1796397	CISD2	stable	493856
196	0.478596	11.5202	5.44496	0.000100369	0.0156693	1.58633	ILMN_1714167	CYB5A	stable	1528
197	-0.840118	11.5408	-5.44408	0.000100523	0.0156693	1.58485	ILMN_1701947	GPR34	down	2857
198	0.510923	8.67072	5.4417	0.000100941	0.0156827	1.58087	ILMN_1666742	C9orf72	up	203228
199	0.358525	10.8711	5.43032	0.000102965	0.0157894	1.56179	ILMN_1751571	RAD23A	stable	5886
200	-1.08793	9.45565	-5.41914	0.000104997	0.0159971	1.54302	ILMN_1699071	MAP3K7CL	down	56911
201	-1.2061	9.46289	-5.41001	0.000106686	0.0160987	1.52768	ILMN_1747305	GIMAP8	down	155038
202	-0.685365	10.2658	-5.40361	0.000107886	0.0161765	1.51693	ILMN_1770824	ARHGAP4	down	393
203	0.540246	10.4743	5.3982	0.000108913	0.0162788	1.50783	ILMN_1720771	STX11	up	8676
204	0.529414	9.985	5.38873	0.000110734	0.0164987	1.4919	ILMN_1768814	KLHL6	up	89857
205	-0.462181	9.97917	-5.38235	0.000111978	0.0165794	1.48116	ILMN_1731064	COQ8A	stable	56997
206	-0.431086	8.54213	-5.37386	0.000113658	0.0167756	1.46685	ILMN_1750181	TESC	stable	54997
207	0.650141	10.9085	5.33987	0.000120648	0.0176967	1.40946	ILMN_1660341	LRPAP1	up	4043
208	0.900218	10.9685	5.33793	0.000121061	0.0177022	1.40618	ILMN_1784948	SPOCD1	up	90853
209	-1.22343	10.1387	-5.32033	0.000124867	0.0181465	1.37641	ILMN_1756928	RTN1	down	6252
210	-0.691248	8.89377	-5.29551	0.000130451	0.0188999	1.33432	ILMN_1666364	COQ10A	down	93058
211	-0.790931	9.28939	-5.29072	0.000131561	0.0190023	1.32618	ILMN_1695711	OTULINL	down	54491
212	-0.681339	9.82819	-5.28647	0.000132551	0.019087	1.31896	ILMN_1665538	SKP2	down	6502
213	0.603936	7.796	5.28373	0.000133194	0.0191213	1.31431	ILMN_1781281	B9D1	up	27077
214	-0.371909	7.56801	-5.27956	0.000134178	0.01914	1.30722	ILMN_1700042	TLN2	stable	83660
215	-0.380864	9.41858	-5.27692	0.000134805	0.01914	1.30274	ILMN_1673275	TRAPPC2	stable	6399
216	-0.386238	9.47629	-5.27599	0.000135027	0.01914	1.30116	ILMN_1750549	PI4K2A	stable	55361
217	0.641316	9.94053	5.27208	0.000135963	0.0191691	1.29451	ILMN_1786388	RNF113A	up	7737
218	-0.431363	11.4254	-5.26657	0.000137294	0.0192992	1.28514	ILMN_1702177	GLO1	stable	2739
219	-1.23917	10.8268	-5.25472	0.000140202	0.0196495	1.26497	ILMN_1678939	VNN2	down	8875
220	0.390892	11.0222	5.24573	0.000142451	0.0199056	1.24965	ILMN_1797793	BLVRB	stable	645
221	-0.264609	7.87672	-5.24024	0.000143843	0.0200409	1.24029	ILMN_1758323	ACP3	stable	55
222	0.373067	7.83623	5.22151	0.0001487	0.020462	1.20832	ILMN_1765979	VSIG10L	stable	147645
223	0.525394	12.3951	5.21967	0.000149188	0.020462	1.20517	ILMN_3240187	EMC3	up	55831
224	0.72488	10.311	5.21933	0.000149278	0.020462	1.20459	ILMN_1788547	GCLM	up	2730
225	0.777237	12.1451	5.21753	0.000149756	0.020462	1.20151	ILMN_1704753	EPAS1	up	2034
226	-0.689179	9.67741	-5.20709	0.000152557	0.0207649	1.18367	ILMN_1744212	INPP5D	down	3635
227	0.391471	12.0153	5.20171	0.000154022	0.020904	1.17447	ILMN_1684585	ACSL1	stable	2180
228	1.65722	9.65373	5.18004	0.000160074	0.0213585	1.13736	ILMN_1684982	PDK4	up	5166
229	-0.727462	8.57924	-5.18001	0.000160084	0.0213585	1.1373	ILMN_1679949	SLC25A23	down	79085
230	0.318286	10.6051	5.17109	0.000162646	0.0215399	1.12201	ILMN_1711909	EDEM2	stable	55741
231	-0.788973	9.52425	-5.16895	0.000163268	0.0215399	1.11833	ILMN_1712532	CARD9	down	64170
232	-0.292143	8.90892	-5.15736	0.000166675	0.0217456	1.09844	ILMN_1744138	CHCHD7	stable	79145
233	0.774789	8.87986	5.15447	0.000167534	0.0217456	1.09349	ILMN_1718977	GADD45B	up	4616
234	0.413751	8.92981	5.15429	0.000167589	0.0217456	1.09317	ILMN_1701111	GPCPD1	stable	56261
235	-0.270969	10.4654	-5.1495	0.000169026	0.0218719	1.08495	ILMN_3248443	SNHG6	stable	641638
236	0.340422	8.34597	5.11759	0.000178942	0.0230198	1.03002	ILMN_1690922	MAST2	stable	23139
237	0.569749	12.0898	5.11445	0.000179949	0.023033	1.02462	ILMN_1806023	JUN	up	3725
238	0.43741	9.18176	5.11044	0.000181244	0.0231097	1.01771	ILMN_2230683	CDCA7L	stable	55536
239	0.529086	11.4517	5.10957	0.000181527	0.0231097	1.0162	ILMN_1685824	B4GALT5	up	9334
240	0.286632	7.56065	5.10652	0.000182521	0.0231595	1.01094	ILMN_1772667	P2RY1	stable	5028
241	0.971549	9.67012	5.1047	0.000183115	0.0231595	1.00781	ILMN_1741404	MSC	up	9242
242	0.424271	13.1451	5.08989	0.000188039	0.0234954	0.982239	ILMN_1766637	GLA	stable	2717
243	0.312297	8.05607	5.07342	0.000193674	0.0240722	0.95378	ILMN_1706818	THADA	stable	63892
244	0.262264	8.00082	5.0679	0.000195601	0.0242478	0.94424	ILMN_1690145	VOPP1	stable	81552
245	0.350441	8.57816	5.06544	0.000196466	0.0242913	0.939984	ILMN_1747504	AHCTF1	stable	25909
246	0.410607	9.38632	5.05141	0.00020148	0.0247815	0.915693	ILMN_1740861	DTWD1	stable	56986
247	-0.254302	7.74094	-5.04541	0.000203666	0.0249854	0.905289	ILMN_1797107	SCLT1	stable	132320
248	0.404137	13.3548	5.03775	0.000206491	0.0252663	0.892007	ILMN_2184184	ANXA1	stable	301
249	0.497876	10.6771	5.03094	0.000209036	0.0254476	0.8802	ILMN_1669599	DENND4C	stable	55667
250	0.426805	10.9193	5.0309	0.000209051	0.0254476	0.880132	ILMN_1663132	ADCK2	stable	90956
251	0.335175	9.6815	5.02585	0.000210959	0.0255182	0.871369	ILMN_1658800	BRPF3	stable	27154
252	0.363963	9.51505	5.02523	0.000211196	0.0255182	0.870285	ILMN_1656902	HECTD3	stable	79654
253	-0.585046	8.68621	-5.02508	0.000211251	0.0255182	0.870034	ILMN_1805916	NIPSNAP1	down	8508
254	-0.454111	11.7777	-5.0217	0.000212541	0.0256085	0.864166	ILMN_1661306	RPL29	stable	6159
255	-0.770114	8.77068	-5.01102	0.00021667	0.0259409	0.845613	ILMN_1757186	GIMAP1	down	170575
256	-0.660406	9.59327	-5.01031	0.000216948	0.0259409	0.844378	ILMN_1696317	CACNA2D4	down	93589
257	-0.33307	7.70955	-5.00762	0.000218003	0.0260013	0.839697	ILMN_3246560	EMB	stable	133418
258	0.508634	10.2011	5.00258	0.000219992	0.0261724	0.83094	ILMN_1808299	IQSEC1	up	9922
259	0.301876	9.48745	4.9926	0.00022399	0.0265624	0.813574	ILMN_1772527	ATG101	stable	60673
260	0.774322	9.87169	4.9916	0.000224395	0.0265624	0.811829	ILMN_1797822	SEL1L3	up	23231
261	-1.50923	9.21636	-4.98649	0.000226474	0.0267415	0.802936	ILMN_1776678	GIMAP7	down	168537
262	-0.542766	8.27865	-4.98479	0.00022717	0.0267568	0.799975	ILMN_1772588	CCDC170	down	80129
263	0.280929	8.25095	4.96636	0.000234866	0.0274578	0.767844	ILMN_1678862	FUT11	stable	170384
264	0.335239	8.35203	4.95808	0.000238409	0.0276666	0.753399	ILMN_1668270	ZDHHC18	stable	84243
265	-0.386427	7.89964	-4.95568	0.000239444	0.0277185	0.749222	ILMN_1691071	FCRLA	stable	84824
266	0.29972	13.3559	4.95313	0.000240552	0.0277788	0.744766	ILMN_1662438	SOD1	stable	6647
267	0.708125	9.19745	4.94326	0.000244892	0.028211	0.727517	ILMN_1716265	PGM2L1	up	283209
268	-0.389303	9.28408	-4.92251	0.000254277	0.0290793	0.691235	ILMN_1798346	RELCH	stable	57614
269	-0.492706	7.69132	-4.9126	0.000258892	0.0294644	0.673881	ILMN_1727466	KCNMB4	stable	27345
270	0.232864	7.88775	4.90319	0.000263352	0.0299	0.657398	ILMN_1777437	LEXM	stable	163747
271	-0.56472	8.95815	-4.90021	0.000264783	0.0299903	0.65217	ILMN_1723260	ETV5	down	2119
272	0.36412	9.10286	4.89502	0.000267288	0.0300578	0.643084	ILMN_1764362	LYAR	stable	55646
273	-0.427173	9.39294	-4.88089	0.000274246	0.030767	0.618284	ILMN_1762712	HHEX	stable	3087
274	0.385966	8.4709	4.87844	0.000275468	0.0308309	0.613991	ILMN_1717887	GOLGA7B	stable	401647
275	-0.738036	8.08812	-4.87583	0.00027678	0.0309045	0.609406	ILMN_1701613	PLAAT4	down	5920
276	0.411289	7.61674	4.87156	0.000278941	0.0309415	0.601901	ILMN_1702775	LRP5	stable	4041
277	0.673589	10.4544	4.87129	0.000279077	0.0309415	0.601432	ILMN_1735495	TBC1D8	up	11138
278	0.397614	7.64932	4.86865	0.000280423	0.0310011	0.596787	ILMN_1807493	ACVRL1	stable	94
279	0.467775	9.6294	4.86756	0.00028098	0.0310011	0.594873	ILMN_1667429	SLC25A20	stable	788
280	0.337875	10.5843	4.86638	0.000281583	0.0310011	0.592802	ILMN_1693136	VTI1B	stable	10490
281	-0.827206	12.97	-4.8621	0.00028379	0.0311624	0.585267	ILMN_1772218	HLA-DPA1	down	3113
282	-0.378103	12.1073	-4.86095	0.000284382	0.0311624	0.583256	ILMN_1768719	RDH11	stable	51109
283	0.346277	8.32903	4.8594	0.000285187	0.0311624	0.580529	ILMN_1661998	METTL6	stable	131965
284	-0.63812	10.1321	-4.85844	0.000285688	0.0311624	0.578835	ILMN_1770085	BTG2	down	7832
285	-0.203168	7.62201	-4.84893	0.000290684	0.0315616	0.562102	ILMN_1757134	MPV17L2	stable	84769
286	-0.388026	12.6557	-4.84555	0.000292481	0.0316794	0.556153	ILMN_1713369	RPL13A	stable	23521
287	0.375907	9.77862	4.84186	0.000294452	0.0316794	0.549669	ILMN_1798395	PIGH	stable	5283
288	0.574027	8.10321	4.83152	0.000300065	0.0321119	0.53144	ILMN_1694810	PANX2	up	56666
289	0.326122	9.35656	4.82895	0.000301473	0.032142	0.526921	ILMN_1731113	ZBTB43	stable	23099
290	0.479564	13.0566	4.81244	0.000310707	0.0330518	0.497796	ILMN_1651826	BASP1	stable	10409
291	0.545897	8.59563	4.80549	0.00031468	0.0331705	0.48553	ILMN_2193980	ABCB6	up	10058
292	-0.300044	7.36557	-4.804	0.000315537	0.0331705	0.482905	ILMN_1747023	PTGIR	stable	5739
293	0.339555	13.6257	4.80395	0.000315565	0.0331705	0.482819	ILMN_1702487	SGK1	stable	6446
294	0.56106	10.0092	4.79996	0.000317878	0.0331705	0.475768	ILMN_1807972	MICAL1	up	64780
295	0.507814	10.8902	4.79951	0.000318143	0.0331705	0.474964	ILMN_1657708	MGLL	up	11343
296	-0.400091	8.17751	-4.7995	0.000318144	0.0331705	0.474961	ILMN_1706764	GOLPH3L	stable	55204
297	1.20858	11.4653	4.79802	0.000319006	0.0331872	0.472347	ILMN_1695246	KLHDC8B	up	200942
298	-0.297887	7.71554	-4.79181	0.000322657	0.0334197	0.461362	ILMN_1718152	DEPDC7	stable	91614
299	0.598416	10.9827	4.77887	0.000330391	0.0340714	0.43849	ILMN_1778144	SLC48A1	up	55652
300	0.238551	9.87496	4.77445	0.000333078	0.0342737	0.430669	ILMN_1658182	MEX3C	stable	51320
301	0.327466	7.86374	4.77098	0.000335201	0.0343425	0.424534	ILMN_1690863	ZNF470	stable	388566
302	-0.46172	10.883	-4.76467	0.000339104	0.0345177	0.413357	ILMN_2208413	ARHGAP15	stable	55843
303	-0.398825	8.20309	-4.75501	0.000345168	0.0348727	0.396241	ILMN_1781996	NUDT16	stable	131870
304	0.343749	10.1236	4.75482	0.000345285	0.0348727	0.395914	ILMN_1745807	TMEM62	stable	80021
305	0.367518	11.8214	4.75451	0.000345483	0.0348727	0.39536	ILMN_1659936	PPP1R15A	stable	23645
306	-0.664984	9.43819	-4.75441	0.000345545	0.0348727	0.395187	ILMN_1705984	HNMT	down	3176
307	0.305308	8.39488	4.75238	0.000346835	0.0349283	0.391588	ILMN_1793386	MED12	stable	9968
308	0.325108	9.17279	4.74783	0.000349747	0.0349995	0.383514	ILMN_1721563	TMEM127	stable	55654
309	-1.39779	10.6062	-4.7478	0.000349766	0.0349995	0.383463	ILMN_1802780	CD163L1	down	283316
310	-0.273012	7.62459	-4.73674	0.000356946	0.0354984	0.363838	ILMN_1689156	MMAB	stable	326625
311	0.378197	9.69722	4.72798	0.00036274	0.0359928	0.348289	ILMN_2044027	NCOR1P1	stable	149934
312	0.488575	9.97575	4.72679	0.00036353	0.0359956	0.346187	ILMN_1800837	CFDP1	stable	10428
313	0.24774	12.6832	4.71108	0.000374192	0.0366858	0.318268	ILMN_1704619	VPS29	stable	51699
314	0.261297	8.71489	4.71064	0.00037449	0.0366858	0.3175	ILMN_1803197	RAB3IP	stable	117177
315	-0.77468	8.28616	-4.71061	0.000374514	0.0366858	0.317438	ILMN_1657373	P3H2	down	55214
316	0.460196	11.2563	4.70999	0.000374942	0.0366858	0.316335	ILMN_1707088	DENND2D	stable	79961
317	0.66081	9.24069	4.70855	0.000375938	0.0366858	0.313772	ILMN_1714170	SPSB1	up	80176
318	0.850549	10.9516	4.7064	0.000377427	0.0367552	0.309954	ILMN_1694780	GCHFR	up	2644
319	-0.765839	8.22613	-4.68876	0.000389894	0.0377283	0.278566	ILMN_1801307	TNFSF10	down	8743
320	0.351547	9.1833	4.68776	0.000390615	0.0377283	0.276781	ILMN_1685574	TSC22D2	stable	9819
321	0.274706	11.7673	4.6655	0.000406989	0.0391497	0.237116	ILMN_1672504	PDXK	stable	8566
322	0.243926	7.52983	4.66404	0.000408086	0.0391755	0.234515	ILMN_1773567	LAMA5	stable	3911
323	-0.489038	10.5859	-4.66006	0.000411092	0.0393839	0.227427	ILMN_1667050	PRPS1	stable	5631
324	0.568887	12.4948	4.6536	0.000416029	0.0395521	0.215894	ILMN_3307729	CXXC5	up	51523
325	0.33152	9.25465	4.65035	0.000418535	0.0396149	0.210092	ILMN_1716876	MED27	stable	9442
326	0.194308	7.59237	4.64742	0.000420805	0.0396981	0.204867	ILMN_1717197	CD3G	stable	917
327	-0.453079	10.8859	-4.64619	0.000421763	0.0396981	0.202672	ILMN_1779886	TBC1D14	stable	57533
328	0.356427	11.0738	4.64577	0.000422092	0.0396981	0.201917	ILMN_1693421	RPN2	stable	6185
329	0.320822	9.94787	4.64489	0.000422777	0.0396981	0.200352	ILMN_1775744	MRPS16	stable	51021
330	1.03143	9.58522	4.63891	0.000427484	0.0399812	0.189656	ILMN_2094061	IMPA2	up	3613
331	-0.236032	7.30544	-4.63011	0.000434499	0.0403246	0.173931	ILMN_1736180	FRAT1	stable	10023
332	0.489162	8.63023	4.63002	0.000434571	0.0403246	0.173771	ILMN_1694596	FAR2	stable	55711
333	-0.433821	8.08754	-4.62467	0.00043889	0.040566	0.164216	ILMN_1793517	RASAL1	stable	8437
334	-0.300515	7.98143	-4.62227	0.000440845	0.0406027	0.159924	ILMN_1724708	RAB33A	stable	9363
335	0.477317	10.8645	4.62207	0.000441007	0.0406027	0.159569	ILMN_1653180	TPM4	stable	7171
336	0.32733	7.6994	4.62045	0.000442332	0.0406455	0.15667	ILMN_1792922	SOD2	stable	6648
337	0.772277	11.7123	4.61268	0.000448745	0.0411547	0.142763	ILMN_1804822	SRXN1	up	140809
338	0.268629	8.36393	4.60972	0.000451209	0.0413005	0.137473	ILMN_1675501	SENP5	stable	205564
339	0.306957	13.3651	4.60756	0.000453026	0.0413712	0.133591	ILMN_1781580	BRI3	stable	25798
340	0.312005	7.91404	4.60337	0.000456553	0.0414682	0.126099	ILMN_1802023	OR7E156P	stable	283491
341	0.574691	10.0802	4.59558	0.000463192	0.04191	0.11215	ILMN_1661622	TBC1D7	up	51256
342	0.514141	8.90815	4.5881	0.000469662	0.0423332	0.0987471	ILMN_1720430	PPDPF	up	79144
343	0.408523	9.3815	4.58646	0.0004711	0.042382	0.0957937	ILMN_1786789	FAM102B	stable	284611
344	-1.17055	11.7074	-4.57478	0.000481426	0.0432286	0.074845	ILMN_1721035	MS4A6A	down	64231
345	0.422259	8.59998	4.57028	0.000485459	0.043508	0.0667843	ILMN_2119297	SAMD4A	stable	23034
346	-0.295602	7.70805	-4.56335	0.000491757	0.0439058	0.0543298	ILMN_1698554	AACS	stable	65985
347	0.497882	11.5807	4.54929	0.000504772	0.0448137	0.0290905	ILMN_3178302	FNDC3B	stable	64778
348	-1.02627	10.7564	-4.5459	0.000507966	0.0449363	0.0229954	ILMN_1700268	QPRT	down	23475
349	-0.404642	9.17722	-4.54174	0.000511913	0.0451928	0.0155168	ILMN_1699676	SPTSSA	stable	171546
350	-0.319296	11.7305	-4.53808	0.000515411	0.0454167	0.00893742	ILMN_2116714	SLC39A1	stable	27173
351	-0.579945	10.811	-4.53233	0.00052096	0.0456245	-0.0014111	ILMN_1803423	ARHGEF6	down	9459
352	-0.22517	11.7748	-4.53164	0.000521632	0.0456245	-0.00265672	ILMN_1683660	EIF3H	stable	8667
353	0.442133	11.0665	4.51805	0.000535007	0.0462448	-0.0271194	ILMN_1788024	PCID2	stable	55795
354	-0.362277	8.04792	-4.51636	0.00053669	0.0462562	-0.0301547	ILMN_1717049	ZNF561	stable	93134
355	0.586502	10.8338	4.50905	0.000544055	0.0467204	-0.0433249	ILMN_1795963	OSGIN1	up	29948
356	0.48246	10.0478	4.50808	0.000545043	0.0467204	-0.0450785	ILMN_1749244	LYRM1	stable	57149
357	-0.800807	8.71611	-4.50456	0.000548625	0.0469422	-0.0514082	ILMN_1735930	KLF2	down	10365
358	0.392205	8.74579	4.5005	0.000552803	0.0471201	-0.0587397	ILMN_1688853	ZBTB9	stable	221504
359	1.13303	11.062	4.49963	0.000553697	0.0471201	-0.0603005	ILMN_1725338	CLDN23	up	137075
360	0.521688	10.52	4.49597	0.000557488	0.0472483	-0.0668932	ILMN_1781285	DUSP1	up	1843
361	-0.212101	10.9895	-4.49529	0.000558205	0.0472483	-0.0681356	ILMN_1770732	COPS3	stable	8533
362	-1.00454	10.3703	-4.49181	0.000561838	0.0474708	-0.074404	ILMN_1756541	MXD4	down	10608
363	-0.549736	8.36454	-4.48384	0.000570256	0.0477549	-0.0887752	ILMN_1780334	KCNJ2	down	3759
364	0.265512	8.19115	4.47979	0.000574594	0.0479482	-0.0960991	ILMN_1807300	PKD2	stable	5311
365	0.507607	9.87915	4.47621	0.00057845	0.0481671	-0.102562	ILMN_1762224	HPS3	up	84343
366	-0.306874	7.47929	-4.47546	0.000579258	0.0481671	-0.10391	ILMN_1786041	ASB9	stable	140462
367	-0.526836	8.25437	-4.47169	0.000583352	0.0481837	-0.110716	ILMN_1681252	LINC00324	down	284029
368	0.374721	8.48014	4.47152	0.000583537	0.0481837	-0.111023	ILMN_1724984	EIF2AK3	stable	9451
369	-0.667177	10.3229	-4.46972	0.000585501	0.0482615	-0.11427	ILMN_2197365	RGS2	down	5997
370	-0.607238	10.7589	-4.46584	0.000589759	0.0483852	-0.121272	ILMN_1663916	ARHGAP9	down	64333
371	0.435928	10.7813	4.45463	0.00060226	0.0491253	-0.14154	ILMN_1718297	EML4	stable	27436
372	-0.867517	13.0478	-5.6456	7.09e-05	0.0123374	1.91936	ILMN_1669940	TMEM38B	down	55151
373	0.42409	9.83641	4.45118	0.00060616	0.0492763	-0.147778	ILMN_1715809	OGFRL1	stable	79627
374	-0.668744	8.74791	-4.44529	0.000612882	0.0495669	-0.158436	ILMN_1659029	DENND6B	down	414918
375	0.318253	13.4674	4.44393	0.000614436	0.0496076	-0.160883	ILMN_1814726	SCARB2	stable	950
376	-0.59574	7.78012	-4.43858	0.000620621	0.0500214	-0.170561	ILMN_1694027	SESN3	stable	143686
377	-0.876743	9.9232	-4.43551	0.000624204	0.0502245	-0.176124	ILMN_1713749	CORO1A	stable	11151
378	-0.394296	9.99542	-4.42998	0.000630699	0.0504401	-0.186127	ILMN_1655077	PRDM1	stable	639
379	-0.380299	11.7892	-4.4296	0.000631156	0.0504401	-0.186826	ILMN_1789809	RPL13AP6	stable	644511
380	-0.617366	7.66251	-4.4251	0.000636492	0.0507646	-0.194962	ILMN_1684497	PYROXD2	stable	84795
381	0.479844	8.59654	4.41464	0.000649099	0.0515254	-0.213915	ILMN_1704656	PPP2R1B	stable	5519
382	0.343403	8.54985	4.41372	0.000650225	0.0515282	-0.215591	ILMN_1803810	RRBP1	stable	6238
383	-0.321422	10.5021	-4.40887	0.000656165	0.0517852	-0.224378	ILMN_1804629	TPK1	stable	27010
384	0.403992	9.42083	4.40713	0.000658308	0.0517852	-0.227529	ILMN_1681081	AGPAT2	stable	10555
385	-0.425185	10.1632	-4.40661	0.000658951	0.0517852	-0.228473	ILMN_1768480	VGLL4	stable	9686
386	0.846568	8.6472	4.40384	0.000662386	0.0519687	-0.233496	ILMN_1801443	TSKU	stable	25987
387	0.478459	11.3325	4.39464	0.000673924	0.0526728	-0.250184	ILMN_1660199	ACAA2	stable	10449
388	0.800682	10.8303	4.39358	0.000675264	0.0526728	-0.252104	ILMN_1805643	RILPL1	stable	353116
389	0.474325	8.62611	4.39314	0.000675821	0.0526728	-0.2529	ILMN_1781565	TLNRD1	stable	59274
390	-0.536442	9.37772	-4.38889	0.000681239	0.0529826	-0.260616	ILMN_1773119	CCNF	stable	899
391	0.211921	9.63093	4.38752	0.000682995	0.0529826	-0.263104	ILMN_1701434	RAP1B	stable	5908
392	0.537993	10.732	4.38686	0.000683831	0.0529826	-0.264287	ILMN_1668743	RILPL2	stable	196383
393	-0.762728	8.9405	-4.38613	0.000684771	0.0529826	-0.265614	ILMN_1730906	FILIP1L	stable	11259
394	-0.444178	13.7724	-4.3839	0.000687649	0.0529826	-0.269667	ILMN_1736567	CD74	stable	972
395	0.389463	11.2545	4.38031	0.0006923	0.0531675	-0.27618	ILMN_1814230	CMC4	stable	100272147
396	0.445748	11.2877	4.37799	0.000695328	0.0533134	-0.280398	ILMN_1810100	PBX3	stable	5090
397	-1.1519	10.2566	-4.36809	0.000708387	0.0542093	-0.298378	ILMN_1657892	TLR8	stable	51311
398	-0.668593	12.4653	-4.35365	0.000727895	0.0552721	-0.324629	ILMN_1755926	DBI	stable	1622
399	-0.295288	8.38739	-4.35178	0.000730465	0.0553143	-0.328035	ILMN_1784113	NAT14	stable	57106
400	0.21127	12.1175	4.34683	0.000737296	0.0557172	-0.337029	ILMN_1793118	TAX1BP1	stable	8887
401	-1.78184	11.1977	-4.34258	0.000743217	0.0558171	-0.344758	ILMN_1797875	ALOX5AP	stable	241
402	0.331868	8.57356	4.34196	0.000744087	0.0558171	-0.345888	ILMN_1780197	TBC1D24	stable	57465
403	-0.514604	11.0679	-4.33833	0.000749196	0.0559894	-0.352501	ILMN_1773963	GNA15	stable	2769
404	0.619819	7.73226	4.33287	0.000756931	0.0564781	-0.362426	ILMN_1811370	HSD11B1	stable	3290
405	-0.31213	7.9351	-4.32818	0.000763655	0.056711	-0.370972	ILMN_1670912	ACVR2A	stable	92
406	0.222744	9.55665	4.31535	0.000782358	0.0576467	-0.394351	ILMN_1712577	FAM174A	stable	345757
407	0.834614	8.77291	4.31187	0.000787498	0.057845	-0.400679	ILMN_1653496	GLUL	stable	2752
408	0.841904	10.1532	4.30665	0.000795303	0.0581992	-0.410208	ILMN_1699887	ST14	stable	6768
409	0.194081	7.34095	4.30549	0.000797046	0.0581992	-0.412323	ILMN_1784459	MMP3	stable	4314
410	-1.8025	11.0929	-4.30197	0.000802355	0.0584816	-0.418739	ILMN_1704730	CD93	stable	22918
411	0.280542	9.43632	4.29821	0.000808067	0.0588071	-0.425593	ILMN_1801553	LEO1	stable	123169
412	-0.323522	8.07651	-4.29675	0.000810295	0.0588515	-0.428253	ILMN_2065690	GRAMD2B	stable	65983
413	0.686295	10.3212	4.29364	0.000815072	0.0588634	-0.433932	ILMN_2347592	NMB	stable	4828
414	-0.294735	8.08156	-4.29207	0.000817491	0.0588671	-0.436795	ILMN_1652846	PCYT2	stable	5833
415	-0.729818	8.383	-4.29196	0.000817665	0.0588671	-0.437001	ILMN_1800739	SPINT2	stable	10653
416	0.589885	9.67198	4.29118	0.000818863	0.0588671	-0.438415	ILMN_1732923	SIPA1L2	stable	57568
417	0.314195	7.54392	4.28887	0.000822446	0.0589018	-0.442634	ILMN_1685493	TMCC3	stable	57458
418	-0.192738	7.20009	-4.28846	0.000823087	0.0589018	-0.443387	ILMN_1689828	DMPK	stable	1760
419	-0.316389	9.5711	-4.28709	0.000825207	0.0589642	-0.445872	ILMN_2065606	TOMM40L	stable	84134
420	0.340754	9.72091	4.28374	0.000830458	0.0590713	-0.452001	ILMN_1716272	KBTBD8	stable	84541
421	0.304092	8.06835	4.28072	0.000835206	0.0591563	-0.457509	ILMN_1753440	DCAF16	stable	54876
422	0.398681	12.0217	4.28002	0.00083631	0.0591563	-0.458786	ILMN_1661537	LEPROT	stable	54741
423	0.583895	10.331	4.2798	0.000836663	0.0591563	-0.459193	ILMN_1804938	TPRA1	stable	131601
424	0.381073	8.99582	4.27687	0.000841297	0.059395	-0.46453	ILMN_1684045	CDCA4	stable	55038
425	0.251795	10.1912	4.27573	0.000843118	0.0594189	-0.466619	ILMN_1707634	CMC1	stable	152100
426	0.849793	8.67917	4.27492	0.00084441	0.0594189	-0.468098	ILMN_1743373	DLL1	stable	28514
427	0.352388	8.37123	4.27208	0.000848957	0.0595193	-0.473288	ILMN_1767135	SOS1	stable	6654
428	0.526067	8.5813	4.27183	0.000849358	0.0595193	-0.473744	ILMN_1746846	TTLL4	stable	9654
429	-0.63597	10.7535	-4.27065	0.000851248	0.0595634	-0.475891	ILMN_1727284	CD4	stable	920
430	-0.235132	11.4153	-4.26949	0.000853117	0.0596059	-0.47801	ILMN_1655422	RPL17	stable	6139
431	-0.59057	10.7957	-4.26838	0.000854915	0.0596111	-0.480044	ILMN_1746252	POLD2	stable	5425
432	-1.11576	10.4864	-4.26788	0.000855716	0.0596111	-0.48095	ILMN_1684887	SAMSN1	stable	64092
433	0.259869	7.87936	4.26252	0.000864441	0.0601302	-0.49075	ILMN_1666169	NBR2	stable	10230
434	-0.563518	8.60525	-4.25831	0.000871351	0.0603602	-0.498443	ILMN_1710092	ZBTB46	stable	140685
435	-0.230496	7.57577	-4.25822	0.000871501	0.0603602	-0.498609	ILMN_1710204	TNFRSF4	stable	7293
436	-0.353915	11.7038	-4.25817	0.000871581	0.0603602	-0.498698	ILMN_1673363	ADGRE5	stable	976
437	0.259639	11.5939	4.25702	0.000873476	0.0603615	-0.500795	ILMN_1688753	PTDSS1	stable	9791
438	-0.410109	9.89262	-4.25661	0.000874157	0.0603615	-0.501548	ILMN_1772702	SRSF8	stable	10929
439	0.487944	9.78891	4.25477	0.000877212	0.0604841	-0.504919	ILMN_1679041	SLC3A2	stable	6520
440	0.473405	11.9487	4.25142	0.000882787	0.0607774	-0.51104	ILMN_2104830	ACP2	stable	53
441	0.345732	9.04732	4.24999	0.000885181	0.0607774	-0.513657	ILMN_1745686	MFHAS1	stable	9258
442	0.330936	9.65968	4.24969	0.000885674	0.0607774	-0.514194	ILMN_1720965	TULP4	stable	56995
443	0.403876	9.54104	4.24913	0.000886612	0.0607774	-0.515217	ILMN_1750394	SLC39A6	stable	25800
444	-0.566003	8.52167	-4.24766	0.000889083	0.0608584	-0.517905	ILMN_1749006	RCSD1	stable	92241
445	0.381734	10.0111	4.24597	0.000891932	0.060965	-0.520996	ILMN_3244506	CRSP8P	stable	441089
446	-0.363772	8.63207	-4.23586	0.00090918	0.0619646	-0.5395	ILMN_1774110	CHN2	stable	1124
447	0.254102	13.3147	4.23463	0.000911301	0.0620197	-0.541751	ILMN_1750101	S100A11	stable	6282
448	-0.33557	7.90313	-4.23364	0.000913007	0.0620464	-0.543559	ILMN_1665219	LTBP4	stable	8425
449	-0.45873	8.87541	-4.22977	0.00091973	0.0624134	-0.550646	ILMN_1684629	CFAP61	stable	26074
450	0.370173	9.27941	4.21583	0.000944361	0.0636279	-0.576177	ILMN_1697153	ZDHHC17	stable	23390
451	0.475072	13.6121	4.21018	0.000954522	0.0637439	-0.586515	ILMN_1782292	LAMP1	stable	3916
452	0.32295	10.1479	4.21017	0.000954539	0.0637439	-0.586533	ILMN_1694686	HMGXB3	stable	22993
453	0.326468	13.7897	4.20641	0.000961377	0.0638633	-0.593428	ILMN_1662618	SQSTM1	stable	8878
454	-0.615994	8.19065	-4.20171	0.000969979	0.0643442	-0.602034	ILMN_1782419	GNG11	stable	2791
455	0.375067	9.97862	4.20028	0.00097263	0.0644296	-0.60467	ILMN_2041577	SLC52A2	stable	79581
456	0.401681	8.32318	4.1986	0.000975732	0.0645445	-0.607745	ILMN_1687743	BTBD7	stable	55727
457	0.35177	11.4821	4.19411	0.000984087	0.0648566	-0.615981	ILMN_1796642	NCF2	stable	4688
458	0.590589	10.446	4.19385	0.00098457	0.0648566	-0.616455	ILMN_1656111	MYLIP	stable	29116
459	0.278296	13.3534	4.193	0.000986157	0.0648708	-0.618012	ILMN_1726769	CNDP2	stable	55748
460	0.177462	7.45818	4.18761	0.000996294	0.0651688	-0.62789	ILMN_2061116	MATN1	stable	4146
461	0.207896	10.7773	4.18679	0.000997843	0.0651688	-0.629391	ILMN_1680239	NUDT9	stable	53343
462	-0.275154	10.007	-4.18588	0.000999569	0.0651688	-0.63106	ILMN_2152581	STK38	stable	11329
463	-0.154723	7.2913	-4.1835	0.00100411	0.0652422	-0.635439	ILMN_3308188	MIR1976	stable	100302190
464	0.401928	11.8001	4.18019	0.00101045	0.0655554	-0.641513	ILMN_1706094	HECTD1	stable	25831
465	0.249518	8.88166	4.17402	0.00102236	0.0662169	-0.652838	ILMN_1702384	ZNF706	stable	51123
466	0.427006	9.06117	4.17346	0.00102344	0.0662169	-0.65386	ILMN_1795839	SCCPDH	stable	51097
467	0.494989	11.6478	4.17159	0.00102709	0.0663202	-0.657291	ILMN_1651799	SLC38A2	stable	54407
468	0.448447	11.3377	4.17025	0.00102971	0.0663202	-0.659756	ILMN_1711102	B3GNT2	stable	10678
469	-0.768205	13.0766	-4.17	0.00103019	0.0663202	-0.660201	ILMN_1750974	S100A9	stable	6280
470	-1.02671	10.6671	-4.16976	0.00103066	0.0663202	-0.660644	ILMN_1738116	TMEM119	stable	338773
471	-0.739889	7.73749	-4.16735	0.0010354	0.0665349	-0.665081	ILMN_1652198	CCM2	stable	83605
472	0.353415	7.87443	4.16635	0.00103736	0.06657	-0.666903	ILMN_1685176	SGMS2	stable	166929
473	-0.53354	9.16761	-4.16179	0.00104641	0.0668779	-0.67529	ILMN_1713058	PSTPIP2	stable	9050
474	-0.359835	7.35998	-4.15997	0.00105003	0.0669553	-0.678633	ILMN_1803739	RPGRIP1	stable	57096
475	0.613389	8.36749	4.15976	0.00105045	0.0669553	-0.679016	ILMN_1738816	FOXO1	stable	2308
476	0.410533	10.1414	4.15856	0.00105284	0.0669954	-0.681212	ILMN_1659206	RARA	stable	5914
477	0.495992	9.47562	4.15802	0.00105392	0.0669954	-0.682198	ILMN_1714335	RDH10	stable	157506
478	-0.306515	8.55991	-4.15425	0.00106151	0.0673876	-0.689134	ILMN_1731666	ZNF641	stable	121274
479	0.42642	10.9374	4.15162	0.00106684	0.0676349	-0.69397	ILMN_1758672	FAM107B	stable	83641
480	-0.407452	8.63204	-4.14306	0.00108435	0.0684899	-0.70969	ILMN_1776649	LRRK2	stable	120892
481	-0.325103	8.21034	-4.14238	0.00108575	0.0684899	-0.710936	ILMN_2225746	BORCS6	stable	54785
482	-0.448041	8.54008	-4.1415	0.00108758	0.0684899	-0.712563	ILMN_1664369	DHTKD1	stable	55526
483	0.326976	9.2688	4.13878	0.00109322	0.0687536	-0.717561	ILMN_1779076	HINT3	stable	135114
484	0.340283	8.81951	4.13122	0.00110907	0.0694365	-0.731457	ILMN_1681415	SIGLEC7	stable	27036
485	-0.309451	11.3519	-4.12878	0.00111424	0.06952	-0.735951	ILMN_1712312	RAB11A	stable	8766
486	0.478659	9.04889	4.12306	0.00112645	0.0700752	-0.746478	ILMN_1763634	PEX14	stable	5195
487	0.770398	10.359	4.12253	0.00112759	0.0700752	-0.747452	ILMN_1693552	CD300A	stable	11314
488	0.345598	8.6174	4.11676	0.00114004	0.070663	-0.758055	ILMN_1686360	ZNF124	stable	7678
489	0.321251	8.93532	4.10567	0.00116439	0.0718896	-0.778468	ILMN_1661500	B4GALT4	stable	8702
490	0.518515	9.79779	4.10026	0.00117649	0.0724933	-0.788443	ILMN_1805161	LZTR1	stable	8216
491	0.535417	11.604	4.09992	0.00117724	0.0724933	-0.789063	ILMN_1718336	C7orf50	stable	84310
492	-0.318547	7.5035	-4.08701	0.0012066	0.0739157	-0.812848	ILMN_1695506	DKK2	stable	27123
493	0.24063	10.4499	4.08228	0.00121754	0.0743928	-0.82156	ILMN_1702065	MFSD5	stable	84975
494	0.405422	11.467	4.07848	0.00122639	0.0747403	-0.828555	ILMN_1688158	CYB5R4	stable	51167
495	0.390328	8.93349	4.0745	0.00123577	0.0750212	-0.835906	ILMN_1691393	DNPEP	stable	23549
496	0.421738	9.83094	4.07247	0.00124056	0.075119	-0.839643	ILMN_1810069	CCNYL1	stable	151195
497	0.259306	8.30569	4.07013	0.00124611	0.0752625	-0.843957	ILMN_1757415	COA7	stable	65260
498	0.358436	9.09615	4.06917	0.00124841	0.0753048	-0.845733	ILMN_1708881	RAB20	stable	55647
499	-0.723057	8.07111	-4.06784	0.00125157	0.0753989	-0.848171	ILMN_1651253	WIPF3	stable	644150
500	0.386061	8.74119	4.0668	0.00125406	0.0754528	-0.850093	ILMN_1719649	TMEM63A	stable	9725
501	0.872213	9.53675	4.05966	0.00127128	0.0761976	-0.863257	ILMN_1725791	HACD1	stable	9200
502	-0.441793	9.92846	-4.05605	0.00128008	0.0765422	-0.869921	ILMN_3244521	LINC00294	stable	283267
503	-0.294595	12.2399	-4.05598	0.00128027	0.0765422	-0.87006	ILMN_1732967	PPP1R18	stable	170954
504	0.583739	12.2139	4.04534	0.00130655	0.0776224	-0.889678	ILMN_1708934	ADM	stable	133
505	-0.656828	7.77534	-4.04355	0.00131104	0.0776975	-0.892989	ILMN_1709613	IGF1	stable	3479
506	-0.436877	7.49036	-4.04299	0.00131246	0.0776975	-0.894033	ILMN_1717572	PGA5	stable	5222
507	-0.361128	9.3145	-4.0426	0.00131342	0.0776975	-0.89474	ILMN_1770433	PIK3CG	stable	5294
508	0.265098	9.68232	4.03902	0.00132246	0.0780766	-0.901361	ILMN_1690546	PPP3CC	stable	5533
509	0.383511	11.2716	4.03665	0.00132846	0.0783326	-0.905726	ILMN_1782459	OSBPL8	stable	114882
510	0.212179	11.531	4.03493	0.00133283	0.078478	-0.908898	ILMN_1798874	EMC4	stable	51234
511	0.488715	9.04806	4.03329	0.00133704	0.078478	-0.911941	ILMN_1778360	PYGB	stable	5834
512	0.247423	8.18535	4.03308	0.00133757	0.078478	-0.912324	ILMN_1656042	KIAA0319L	stable	79932
513	-0.68792	8.59178	-4.02905	0.00134793	0.0788897	-0.91977	ILMN_3248591	LTBP2	stable	4053
514	-0.432669	11.957	-4.02658	0.0013543	0.0791647	-0.924324	ILMN_1763452	EVI2B	stable	2124
515	-0.340336	10.7804	-4.02307	0.00136343	0.0795013	-0.930805	ILMN_1691572	TST	stable	7263
516	-0.400158	9.04331	-4.01856	0.00137526	0.0799923	-0.939146	ILMN_1711030	OPLAH	stable	26873
517	-0.87452	8.41914	-4.01792	0.00137693	0.0799923	-0.940315	ILMN_1698007	ACKR4	stable	51554
518	0.208723	10.1607	4.01722	0.00137878	0.0800015	-0.941612	ILMN_1708604	CCZ1	stable	51622
519	-0.385405	7.94972	-4.00154	0.00142082	0.0823396	-0.970597	ILMN_1815951	PCYOX1L	stable	78991
520	-0.291909	7.88238	-4.0002	0.00142448	0.0824506	-0.973081	ILMN_2227968	NTHL1	stable	4913
521	-0.245331	8.43592	-3.99741	0.00143211	0.0825813	-0.978237	ILMN_1712320	DDX50	stable	79009
522	-0.197541	7.50332	-3.99737	0.00143221	0.0825813	-0.978302	ILMN_1738207	CISH	stable	1154
523	0.274218	7.86596	3.99682	0.00143373	0.0825813	-0.979328	ILMN_1694475	GTPBP2	stable	54676
524	-0.272378	10.8585	-3.99404	0.0014414	0.0829004	-0.984471	ILMN_2174394	MMS19	stable	64210
525	0.338728	9.21038	3.9929	0.00144454	0.0829004	-0.986573	ILMN_2199284	ANAPC7	stable	51434
526	0.356266	9.94432	3.99072	0.00145058	0.0830384	-0.990602	ILMN_1738491	SNX30	stable	401548
527	0.261818	13.4575	3.9895	0.00145398	0.0830384	-0.992856	ILMN_1666976	PLD3	stable	23646
528	0.348055	10.4356	3.98867	0.00145631	0.0830714	-0.994406	ILMN_1708805	NCOA3	stable	8202
529	-0.227612	8.35119	-3.98488	0.00146692	0.0835757	-1.00141	ILMN_1682336	MASTL	stable	84930
530	0.395975	9.54799	3.98298	0.00147228	0.0837574	-1.00493	ILMN_1664068	ERGIC1	stable	57222
531	-0.36127	12.7069	-3.97979	0.00148132	0.0839904	-1.01083	ILMN_1765858	CAB39	stable	51719
532	0.787981	8.78231	3.97763	0.00148747	0.0842381	-1.01483	ILMN_1670844	OPN3	stable	23596
533	0.269875	9.3347	3.97483	0.00149546	0.084491	-1.02	ILMN_1751051	C7orf25	stable	79020
534	-0.904729	8.82489	-3.96978	0.00151004	0.0847537	-1.02936	ILMN_1779015	ZNF467	stable	168544
535	-0.186616	7.62159	-3.96969	0.00151028	0.0847537	-1.02951	ILMN_1757391	TMEM50B	stable	757
536	-0.249851	7.34678	-3.96947	0.00151093	0.0847537	-1.02993	ILMN_3308936	MIR223	stable	407008
537	-0.30605	8.77423	-3.96882	0.00151282	0.0847592	-1.03114	ILMN_1675684	APOBEC3C	stable	27350
538	-0.741243	10.8386	-3.96631	0.0015201	0.0850512	-1.03577	ILMN_1656285	METTL7A	stable	25840
539	0.262491	9.9145	3.95768	0.0015455	0.0859783	-1.05175	ILMN_2231020	TMEM185B	stable	79134
540	0.493138	8.36819	3.95064	0.00156654	0.087046	-1.0648	ILMN_1655068	TOM1L2	stable	146691
541	-0.193818	7.72486	-3.94872	0.00157232	0.0871621	-1.06835	ILMN_1801045	SPIN3	stable	169981
542	-0.340732	9.01903	-3.94633	0.00157955	0.0874606	-1.07278	ILMN_2161508	PHTF2	stable	57157
543	0.484669	8.9858	3.94411	0.00158631	0.087675	-1.0769	ILMN_1811029	TLK1	stable	9874
544	-0.654464	10.0565	-3.94372	0.00158748	0.087675	-1.07761	ILMN_1693431	LACC1	stable	144811
545	-0.571179	9.28281	-3.94323	0.00158899	0.087675	-1.07853	ILMN_1730294	INO80C	stable	125476
546	-0.864514	9.87279	-3.94205	0.00159259	0.0877707	-1.08071	ILMN_1692177	TSC22D1	stable	8848
547	-0.964186	9.33287	-3.93629	0.00161029	0.0883342	-1.09137	ILMN_1665865	IGFBP4	stable	3487
548	-0.242535	10.2091	-3.93176	0.00162439	0.0887981	-1.09978	ILMN_1717366	MDFIC	stable	29969
549	0.357161	13.6661	3.92596	0.00164259	0.0894331	-1.11052	ILMN_1693014	CEBPB	stable	1051
550	0.569667	12.7368	3.92445	0.00164737	0.0894331	-1.11332	ILMN_1693338	CYP1B1	stable	1545
551	-0.177	7.52841	-3.92239	0.0016539	0.0896844	-1.11714	ILMN_1657868	SIRT4	stable	23409
552	0.365447	10.1923	3.92011	0.00166118	0.0898932	-1.12138	ILMN_1732809	ALG9	stable	79796
553	0.462303	8.34487	3.91511	0.00167721	0.0905545	-1.13064	ILMN_1665510	ERRFI1	stable	54206
554	-0.596199	9.11536	-3.91265	0.00168517	0.0908096	-1.1352	ILMN_1795344	GOLIM4	stable	27333
555	0.713058	11	3.91234	0.00168618	0.0908096	-1.13578	ILMN_1730032	BOK	stable	666
556	0.238427	9.15178	3.9105	0.00169214	0.0910268	-1.13919	ILMN_1771411	ALG6	stable	29929
557	-0.149068	7.06823	-3.90892	0.00169729	0.0910965	-1.14212	ILMN_1764959	SAXO1	stable	158297
558	0.454884	8.57515	3.90777	0.00170107	0.0911009	-1.14426	ILMN_1815130	MICALL1	stable	85377
559	-0.364719	8.03317	-3.90772	0.00170123	0.0911009	-1.14435	ILMN_1745623	CRACR2B	stable	283229
560	-0.159112	7.12946	-3.90361	0.00171472	0.0917189	-1.15197	ILMN_2060086	ADAM23	stable	8745
561	-0.257165	9.0866	-3.90267	0.00171784	0.0917514	-1.15372	ILMN_1703754	CEP192	stable	55125
562	0.508286	8.81298	3.90203	0.00171994	0.0917514	-1.1549	ILMN_1651950	TPST1	stable	8460
563	-0.308832	7.71559	-3.90167	0.00172115	0.0917514	-1.15558	ILMN_1698728	FGD4	stable	121512
564	0.335911	10.886	3.8998	0.00172734	0.0919776	-1.15904	ILMN_1812552	ACER3	stable	55331
565	0.384222	12.867	3.8968	0.00173736	0.0921991	-1.16461	ILMN_1802557	HEBP1	stable	50865
566	-0.5078	9.05226	-3.89572	0.00174095	0.092262	-1.16661	ILMN_1814194	TCF4	stable	6925
567	0.204403	12.4327	3.89527	0.00174245	0.092262	-1.16744	ILMN_1783753	TXNDC12	stable	51060
568	-0.532993	8.52669	-3.89396	0.00174687	0.0923193	-1.16988	ILMN_1757604	TPM2	stable	7169
569	0.38502	8.57422	3.89321	0.0017494	0.0923193	-1.17127	ILMN_2198499	SLC25A51	stable	92014
570	0.341259	9.07263	3.88764	0.00176824	0.0931057	-1.1816	ILMN_1685002	RCE1	stable	9986
571	-0.308535	10.4077	-3.88225	0.0017867	0.0934528	-1.19162	ILMN_1667839	UBR7	stable	55148
572	0.298575	7.85455	3.8776	0.00180276	0.0939423	-1.20024	ILMN_1730928	CDK5R1	stable	8851
573	-0.381287	11.6069	-3.87609	0.001808	0.0939423	-1.20304	ILMN_1731354	PARL	stable	55486
574	0.197401	7.53359	3.87355	0.00181688	0.0943002	-1.20776	ILMN_2164164	AICDA	stable	57379
575	-1.34279	8.60664	-3.87275	0.00181967	0.0943413	-1.20924	ILMN_1677827	TLR7	stable	51284
576	-0.259197	7.70561	-3.87204	0.00182216	0.0943669	-1.21056	ILMN_1760506	HSD17B7P2	stable	158160
577	0.655728	8.91353	3.8699	0.00182968	0.0944901	-1.21453	ILMN_1687440	HIPK2	stable	28996
578	1.11304	8.14993	3.86818	0.00183576	0.0945524	-1.21773	ILMN_1801216	S100P	stable	6286
579	-0.609452	7.82218	-3.86376	0.00185146	0.0951539	-1.22594	ILMN_1794803	NDP	stable	4693
580	-0.303496	9.46532	-3.85878	0.00186932	0.095967	-1.23519	ILMN_1733311	PIGB	stable	9488
581	0.292602	9.82862	3.85493	0.00188324	0.0963675	-1.24234	ILMN_1688452	LCMT1	stable	51451
582	0.261811	8.42544	3.85301	0.00189022	0.0966199	-1.24591	ILMN_1683300	BAX	stable	581
583	-0.298517	8.55439	-3.84975	0.00190212	0.0970187	-1.25196	ILMN_1779010	MAP3K3	stable	4215
584	0.404705	11.1691	3.84913	0.00190443	0.0970313	-1.25312	ILMN_3245458	SNORA61	stable	677838
585	0.280526	8.35235	3.84822	0.00190775	0.0970463	-1.2548	ILMN_1768751	MTA3	stable	57504
586	0.385993	11.6169	3.84683	0.00191289	0.0970463	-1.2574	ILMN_1793410	SNTB1	stable	6641
587	-0.306449	10.6522	-3.84681	0.00191294	0.0970463	-1.25742	ILMN_1660186	SYF2	stable	25949
588	-0.468997	7.77341	-3.84117	0.00193387	0.098003	-1.26791	ILMN_1690454	INKA1	stable	389119
589	-0.617337	8.76065	-3.83863	0.00194336	0.0982144	-1.27263	ILMN_1752755	VWF	stable	7450
590	-0.19724	7.25054	-3.83783	0.00194636	0.0982144	-1.27412	ILMN_1683194	DCN	stable	1634
591	0.19887	7.66446	3.83433	0.00195955	0.0983546	-1.28062	ILMN_2077680	CLDND2	stable	125875
592	0.470511	8.93762	3.83433	0.00195955	0.0983546	-1.28062	ILMN_1656194	TSPAN10	stable	83882
593	0.354942	7.98104	3.83175	0.00196935	0.0984483	-1.28543	ILMN_1809607	PPIF	stable	10105
594	-1.40105	11.3096	-3.83157	0.00197002	0.0984483	-1.28576	ILMN_1668063	FCN1	stable	2219
595	0.490262	12.4175	3.83057	0.00197383	0.0984483	-1.28762	ILMN_1783226	SSR2	stable	6746
596	0.205214	7.2343	3.83054	0.00197393	0.0984483	-1.28767	ILMN_1688722	IL13RA2	stable	3598
597	0.433408	7.99562	3.82909	0.00197945	0.0986152	-1.29036	ILMN_1651610	SPRY1	stable	10252
598	-0.321581	11.9862	-3.82821	0.00198284	0.0986152	-1.29201	ILMN_1742163	MTMR12	stable	54545
599	-0.404544	9.76944	-3.82748	0.00198563	0.0986152	-1.29336	ILMN_1781468	SMAP2	stable	64744
600	0.24821	7.3535	3.8257	0.00199244	0.09885	-1.29666	ILMN_1679901	PPARG	stable	5468
601	0.511293	9.8732	3.82483	0.00199581	0.0988563	-1.29829	ILMN_1779706	TP53BP2	stable	7159
602	0.304862	7.98976	3.82439	0.00199748	0.0988563	-1.2991	ILMN_1791647	ASIP	stable	434
603	0.243462	7.46922	3.82404	0.00199885	0.0988563	-1.29976	ILMN_1706548	SPTBN4	stable	57731
604	0.48211	7.75824	3.82149	0.0020087	0.0989349	-1.30449	ILMN_1661197	CLCF1	stable	23529
605	-0.597317	9.32441	-3.82115	0.00201002	0.0989349	-1.30513	ILMN_1677098	YPEL2	stable	388403
606	0.283514	8.45584	3.82092	0.00201091	0.0989349	-1.30556	ILMN_1667577	LCMT2	stable	9836
607	0.517903	9.39316	3.81825	0.00202131	0.0991431	-1.31052	ILMN_1791569	PLXNA1	stable	5361
608	0.388836	10.9953	3.81818	0.00202159	0.0991431	-1.31066	ILMN_2214997	LRRFIP1	stable	9208
609	-0.488737	7.74317	-3.81768	0.00202354	0.0991431	-1.31159	ILMN_1691334	NME8	stable	51314
610	-0.216458	7.87237	-3.81519	0.00203328	0.0994139	-1.31621	ILMN_1726989	FAAP20	stable	199990
611	-0.314115	11.8771	-3.8119	0.00204622	0.0999432	-1.32232	ILMN_1660364	CYTH4	stable	27128
612	-1.45942	9.16071	-3.81088	0.00205026	0.100037	-1.32422	ILMN_1745963	FOLR2	stable	2350
613	-0.343805	10.7528	-3.80891	0.0020581	0.100316	-1.3279	ILMN_1779735	LAMTOR4	stable	389541
614	-0.52815	13.446	-3.80806	0.00206148	0.100364	-1.32948	ILMN_1742981	TUBA1A	stable	7846
615	0.564711	11.5767	3.79372	0.00211937	0.102772	-1.35616	ILMN_1667430	DEGS1	stable	8560
616	-0.337546	7.70862	-3.79309	0.00212192	0.10279	-1.35732	ILMN_1723436	PFKFB2	stable	5208
617	0.559986	11.2503	3.79141	0.00212883	0.102809	-1.36045	ILMN_1756572	COQ2	stable	27235
618	0.350404	11.5135	3.78202	0.00216781	0.104052	-1.37792	ILMN_1689001	CDK4	stable	1019
619	-0.728913	8.87539	-3.77533	0.00219603	0.105222	-1.39038	ILMN_1773125	ENTPD1	stable	953
620	-1.31606	9.71108	-3.77183	0.00221094	0.105572	-1.3969	ILMN_1730710	ADORA3	stable	140
621	0.164988	7.23229	3.77175	0.00221125	0.105572	-1.39704	ILMN_1660655	SUGT1P1	stable	441394
622	-0.653018	8.30544	-3.76973	0.00221993	0.105572	-1.40081	ILMN_1696294	SNX6	stable	58533
623	0.73864	7.64046	3.76581	0.0022368	0.106071	-1.4081	ILMN_1696584	ORM1	stable	5004
624	0.235643	12.0529	3.76044	0.00226016	0.106857	-1.4181	ILMN_1699772	RRAGD	stable	58528
625	0.454678	12.8164	3.76044	0.00226018	0.106857	-1.41811	ILMN_1784207	PITHD1	stable	57095
626	0.651017	9.77382	3.75946	0.00226447	0.106953	-1.41994	ILMN_1678353	FARP1	stable	10160
627	-0.504184	11.2838	-3.75436	0.0022869	0.107608	-1.42942	ILMN_2353633	ADGRE2	stable	30817
628	0.159275	7.29482	3.75371	0.00228977	0.107608	-1.43063	ILMN_1695631	CHP2	stable	63928
629	0.683589	9.49812	3.75243	0.00229545	0.107663	-1.43302	ILMN_1768391	ARL4C	stable	10123
630	0.428432	8.37932	3.75172	0.00229859	0.107672	-1.43434	ILMN_1676384	PCSK6	stable	5046
631	-0.250113	12.0999	-3.75136	0.00230021	0.107672	-1.43501	ILMN_1798980	CAPZB	stable	832
632	-0.331933	11.3928	-3.73774	0.00236164	0.109786	-1.46039	ILMN_1684289	PNPO	stable	55163
633	0.188879	9.96723	3.7354	0.00237236	0.110068	-1.46475	ILMN_1728471	ARFGEF1	stable	10565
634	0.556442	10.1269	3.73439	0.00237699	0.110174	-1.46662	ILMN_1699100	SOAT1	stable	6646
635	0.573101	9.02348	3.73324	0.00238229	0.110312	-1.46877	ILMN_1663042	SDC4	stable	6385
636	-0.235856	8.17753	-3.72948	0.0023997	0.1109	-1.47578	ILMN_1673509	RPL28	stable	6158
637	-0.171494	9.86896	-3.72832	0.00240511	0.111042	-1.47794	ILMN_1762115	CRYZL1	stable	9946
638	0.299149	8.64004	3.72674	0.00241248	0.111273	-1.48089	ILMN_1727023	AMMECR1L	stable	83607
639	0.313868	9.05558	3.72335	0.00242837	0.111836	-1.4872	ILMN_1786843	KCTD13	stable	253980
640	0.198724	7.99357	3.72312	0.00242942	0.111836	-1.48762	ILMN_1661399	ARL4A	stable	10124
641	0.298728	8.15334	3.71918	0.00244805	0.112365	-1.49498	ILMN_1659350	CASP6	stable	839
642	0.484569	10.1565	3.71773	0.00245493	0.112462	-1.49767	ILMN_1658759	PEX19	stable	5824
643	0.401648	8.13403	3.71207	0.00248196	0.113152	-1.50821	ILMN_1714522	CLMN	stable	79789
644	-0.391923	10.2748	-3.7107	0.00248856	0.113343	-1.51077	ILMN_3235637	LOC100128288	stable	100128288
645	-0.257737	7.73742	-3.70869	0.00249828	0.113484	-1.51452	ILMN_1751161	COL7A1	stable	1294
646	-0.401591	8.05147	-3.70857	0.00249886	0.113484	-1.51474	ILMN_1729314	PRG2	stable	5553
647	-0.357145	9.11473	-3.70716	0.0025057	0.113561	-1.51737	ILMN_1755658	ABI3	stable	51225
648	-0.36821	10.2247	-3.70569	0.00251286	0.113683	-1.52012	ILMN_1778444	FKBP5	stable	2289
649	0.284573	11.5914	3.70386	0.00252179	0.113786	-1.52353	ILMN_1745954	CORO1C	stable	23603
650	0.197822	9.61756	3.70374	0.00252237	0.113786	-1.52375	ILMN_1730048	C7orf26	stable	79034
651	-0.415795	12.7625	-3.69928	0.00254424	0.114663	-1.53206	ILMN_1672503	DPYSL2	stable	1808
652	0.255008	7.85879	3.69616	0.00255967	0.115248	-1.53788	ILMN_1661427	RFNG	stable	5986
653	-0.72775	8.22241	-3.69542	0.00256334	0.115256	-1.53926	ILMN_1776905	TMEM236	stable	653567
654	-0.543088	9.13379	-3.69514	0.00256472	0.115256	-1.53977	ILMN_1756685	DEPTOR	stable	64798
655	0.317141	8.51032	3.69113	0.00258477	0.115809	-1.54726	ILMN_1701402	IKBIP	stable	121457
656	0.429061	9.1919	3.69072	0.00258683	0.115809	-1.54803	ILMN_1807919	TNS1	stable	7145
657	0.35254	7.6939	3.69007	0.00259007	0.115844	-1.54924	ILMN_1710408	LGR4	stable	55366
658	0.253811	9.65999	3.68544	0.00261341	0.116557	-1.55787	ILMN_1667222	MTX1	stable	4580
659	-0.24959	8.72416	-3.68441	0.00261863	0.11668	-1.55979	ILMN_2062754	SRA1	stable	10011
660	0.242745	8.39251	3.68297	0.00262598	0.116822	-1.56248	ILMN_1759495	XPO5	stable	57510
661	0.206282	8.51067	3.68281	0.00262678	0.116822	-1.56278	ILMN_1774890	LAS1L	stable	81887
662	0.22642	11.0665	3.68059	0.00263809	0.117021	-1.56691	ILMN_1710326	CLDND1	stable	56650
663	0.61504	11.4804	3.68016	0.0026403	0.117021	-1.56771	ILMN_1794875	GPAT3	stable	84803
664	-0.267067	9.84706	-3.67999	0.00264116	0.117021	-1.56803	ILMN_1803464	PHTF1	stable	10745
665	0.323558	13.6404	3.67714	0.00265579	0.117559	-1.57334	ILMN_1713934	LITAF	stable	9516
666	0.955046	8.8217	3.67537	0.00266495	0.117854	-1.57665	ILMN_1659914	AK8	stable	158067
667	-0.23431	8.27562	-3.67438	0.00267005	0.117969	-1.57849	ILMN_1788053	SLC25A12	stable	8604
668	-0.31967	9.7668	-3.67365	0.00267383	0.118026	-1.57985	ILMN_1767894	POLB	stable	5423
669	0.186409	7.27647	3.66958	0.00269504	0.118851	-1.58745	ILMN_3308966	MIR1910	stable	100302261
670	0.371125	9.27315	3.66418	0.00272341	0.11999	-1.59752	ILMN_1700202	TMEM135	stable	65084
671	0.339588	11.3912	3.65934	0.00274912	0.120813	-1.60656	ILMN_1701655	SLC8B1	stable	80024
672	0.424275	9.15678	3.65922	0.00274976	0.120813	-1.60678	ILMN_1707748	PIM3	stable	415116
673	0.269706	7.76457	3.65859	0.0027531	0.120847	-1.60795	ILMN_1796639	UBQLN3	stable	50613
674	0.31721	8.69867	3.65758	0.00275849	0.120971	-1.60983	ILMN_1741954	SMYD3	stable	64754
675	0.434452	13.0337	3.65666	0.00276341	0.120972	-1.61154	ILMN_1679809	GSTP1	stable	2950
676	-0.545812	9.18496	-3.65635	0.00276508	0.120972	-1.61212	ILMN_1747205	JDP2	stable	122953
677	0.28673	9.00142	3.65611	0.00276636	0.120972	-1.61257	ILMN_1739236	ZNF668	stable	79759
678	0.267076	10.2263	3.6531	0.00278256	0.121351	-1.61818	ILMN_1743711	XPOT	stable	11260
679	0.288731	8.72678	3.64859	0.00280703	0.12208	-1.6266	ILMN_1809003	CBR1	stable	873
680	-0.17242	7.55344	-3.64498	0.00282676	0.122262	-1.63334	ILMN_1812567	ICA1	stable	3382
681	0.558832	8.51128	3.64237	0.00284115	0.12266	-1.63822	ILMN_1652677	FAM89A	stable	375061
682	0.896992	9.33733	3.63959	0.00285652	0.123211	-1.64341	ILMN_1723971	SLC29A1	stable	2030
683	-0.220556	11.2486	-3.63492	0.00288252	0.124141	-1.65212	ILMN_1699208	NAP1L1	stable	4673
684	0.311538	10.0303	3.63414	0.0028869	0.124141	-1.65358	ILMN_1691276	CXXC1	stable	30827
685	-0.207332	7.89348	-3.63392	0.00288813	0.124141	-1.65399	ILMN_1747192	RNF125	stable	54941
686	0.754962	10.5635	3.63384	0.00288858	0.124141	-1.65413	ILMN_1736863	TMEM140	stable	55281
687	-0.312911	8.1128	-3.63209	0.00289841	0.124414	-1.6574	ILMN_1662747	EVI2A	stable	2123
688	0.302353	13.599	3.63157	0.00290134	0.124414	-1.65837	ILMN_1742789	LPXN	stable	9404
689	0.331875	7.53716	3.62887	0.00291659	0.12489	-1.66341	ILMN_1688580	CAMP	stable	820
690	-0.833035	8.62756	-3.62748	0.00292444	0.125113	-1.66599	ILMN_1730628	RNASE2	stable	6036
691	-0.189203	7.34745	-3.62305	0.00294973	0.12608	-1.67427	ILMN_1663397	CAMK2B	stable	816
692	0.233467	12.3908	3.62169	0.00295752	0.126299	-1.67681	ILMN_1769319	CNBP	stable	7555
693	0.425291	9.69678	3.62039	0.00296499	0.126504	-1.67923	ILMN_1811616	EEPD1	stable	80820
694	-0.965996	10.7083	-3.61962	0.0029694	0.126578	-1.68066	ILMN_1735827	NISCH	stable	11188
695	0.354648	9.32946	3.61836	0.00297671	0.12666	-1.68302	ILMN_1696311	BPNT2	stable	54928
696	0.381285	11.4854	3.6177	0.0029805	0.126708	-1.68424	ILMN_1798061	ZFYVE26	stable	23503
697	0.336989	9.09575	3.61651	0.00298741	0.12673	-1.68647	ILMN_1770206	GEMIN4	stable	50628
698	0.686639	10.0098	3.61623	0.00298907	0.12673	-1.687	ILMN_1702320	JAKMIP2	stable	9832
699	0.360472	10.3379	3.61317	0.00300686	0.127171	-1.6927	ILMN_1703330	FEM1C	stable	56929
700	0.234331	7.93542	3.61209	0.00301319	0.127181	-1.69473	ILMN_1773553	FLJ46906	stable	441172
701	0.481019	8.22999	3.61049	0.00302257	0.127236	-1.69771	ILMN_1703263	SP140	stable	11262
702	-0.327364	10.6483	-3.60853	0.00303411	0.127535	-1.70137	ILMN_2176251	MGME1	stable	92667
703	0.743541	9.20339	3.60791	0.00303776	0.127535	-1.70253	ILMN_1787186	CCN3	stable	4856
704	-0.166493	7.16622	-3.60597	0.00304922	0.127902	-1.70615	ILMN_1766261	SLC2A12	stable	154091
705	-0.522345	9.36978	-3.60426	0.00305937	0.128209	-1.70934	ILMN_1745620	KRCC1	stable	51315
706	0.409804	11.3937	3.60382	0.00306196	0.128209	-1.71015	ILMN_1752451	CTSH	stable	1512
707	-0.194907	7.74407	-3.60237	0.00307062	0.128458	-1.71287	ILMN_1700307	ZNF815P	stable	401303
708	-0.201936	8.73995	-3.60022	0.00308348	0.128881	-1.71689	ILMN_1693630	VPS9D1	stable	9605
709	0.293416	12.7124	3.59852	0.00309367	0.129116	-1.72005	ILMN_1806312	TMEM230	stable	29058
710	0.650561	8.84839	3.59837	0.00309457	0.129116	-1.72033	ILMN_1656837	RBP1	stable	5947
711	-0.329858	8.80914	-3.59667	0.0031048	0.129325	-1.7235	ILMN_1728180	LUC7L3	stable	51747
712	0.259861	8.39417	3.59663	0.00310505	0.129325	-1.72358	ILMN_1658884	ATP11B	stable	23200
713	-0.482396	10.6485	-3.59388	0.00312172	0.129684	-1.72873	ILMN_1661631	LILRA3	stable	11026
714	-0.166998	8.12475	-3.59385	0.0031219	0.129684	-1.72878	ILMN_1716973	POLM	stable	27434
715	-0.326318	10.1227	-3.59205	0.0031328	0.130022	-1.73213	ILMN_3256478	LOC100129034	stable	100129034
716	0.422616	13.0133	3.58914	0.00315057	0.130645	-1.73756	ILMN_1667748	ANKRD33	stable	341405
717	-0.368647	11.1211	-3.58557	0.0031725	0.131439	-1.74423	ILMN_1798659	CCDC28A	stable	25901
718	-0.145519	7.02455	-3.57903	0.00321308	0.132788	-1.75644	ILMN_1803956	BOC	stable	91653
719	0.603726	9.42367	3.57772	0.00322128	0.132993	-1.75888	ILMN_1730917	KMO	stable	8564
720	0.220561	9.13991	3.57709	0.00322522	0.133039	-1.76006	ILMN_1741736	DDX28	stable	55794
721	-0.368015	9.72525	-3.57395	0.00324497	0.133277	-1.76592	ILMN_1718960	SERPINB8	stable	5271
722	-0.398876	9.67348	-3.57351	0.0032478	0.133277	-1.76676	ILMN_3307827	DNAJC4	stable	3338
723	0.216889	7.48717	3.57345	0.00324812	0.133277	-1.76685	ILMN_1738971	USP54	stable	159195
724	0.411881	9.5354	3.57321	0.00324966	0.133277	-1.76731	ILMN_1692464	TTC38	stable	55020
725	-0.222745	7.26534	-3.57242	0.00325469	0.133277	-1.76879	ILMN_1853599	LINC01119	stable	100134259
726	-0.171431	7.26512	-3.5717	0.00325924	0.133277	-1.77013	ILMN_1664236	ADAM28	stable	10863
727	-0.230364	7.54354	-3.57145	0.0032608	0.133277	-1.7706	ILMN_2106725	NCF1B	stable	654816
728	-0.267838	13.2444	-3.57102	0.00326355	0.133277	-1.7714	ILMN_1769810	ARL6IP5	stable	10550
729	-0.287765	7.56851	-3.56992	0.00327049	0.133277	-1.77344	ILMN_1660519	C3orf70	stable	285382
730	0.213635	13.8655	3.56822	0.00328136	0.133605	-1.77663	ILMN_1746588	TALDO1	stable	6888
731	0.241427	11.4678	3.56608	0.00329502	0.1338	-1.78062	ILMN_1676448	WDFY1	stable	57590
732	-0.252075	11.7789	-3.56577	0.00329701	0.1338	-1.7812	ILMN_1684321	CYB5B	stable	80777
733	-0.421102	9.51049	-3.565	0.00330194	0.1338	-1.78264	ILMN_1742427	POLR1D	stable	51082
734	0.648952	9.27629	3.56449	0.00330526	0.1338	-1.7836	ILMN_1812191	C12orf57	stable	113246
735	-0.563164	9.66983	-3.5624	0.00331868	0.134171	-1.78749	ILMN_1711223	LINC01094	stable	100505702
736	0.263446	9.76228	3.56163	0.00332366	0.134171	-1.78893	ILMN_1652082	ELF4	stable	2000
737	-0.269302	9.24676	-3.55987	0.00333509	0.134517	-1.79223	ILMN_1801101	ZBTB48	stable	3104
738	0.25986	7.38577	3.55805	0.00334691	0.134764	-1.79562	ILMN_1776000	EID3	stable	493861
739	-0.414259	9.61214	-3.55171	0.0033884	0.135971	-1.80745	ILMN_1809437	RHBDD2	stable	57414
740	0.338082	10.6698	3.55005	0.00339938	0.136296	-1.81056	ILMN_1736940	HPRT1	stable	3251
741	0.238064	10.1697	3.54865	0.00340864	0.136551	-1.81317	ILMN_1765880	USB1	stable	79650
742	0.629308	10.7159	3.54363	0.0034421	0.137203	-1.82255	ILMN_1810852	LAMC1	stable	3915
743	0.229153	12.3533	3.54349	0.00344302	0.137203	-1.8228	ILMN_1743655	TMED9	stable	54732
744	0.242554	9.90942	3.54298	0.00344643	0.137203	-1.82375	ILMN_1694603	SMARCC1	stable	6599
745	0.42653	11.073	3.5427	0.00344835	0.137203	-1.82429	ILMN_1742705	SLC39A11	stable	201266
746	-0.177008	7.21873	-3.54254	0.00344943	0.137203	-1.82459	ILMN_1670959	CEACAM5	stable	1048
747	-0.465108	9.72588	-3.54229	0.00345106	0.137203	-1.82504	ILMN_1680132	CADM1	stable	23705
748	0.312374	11.0143	3.53581	0.00349489	0.138712	-1.83716	ILMN_1737580	DESI1	stable	27351
749	0.472725	8.11352	3.53006	0.0035342	0.139785	-1.84789	ILMN_1695025	CD2	stable	914
750	0.284342	11.3449	3.52507	0.00356871	0.140461	-1.85722	ILMN_1673421	LINC01720	stable	440704
751	-0.450122	8.21623	-3.52298	0.00358326	0.140692	-1.86112	ILMN_1696546	FZD1	stable	8321
752	0.234625	9.13185	3.52251	0.00358649	0.140692	-1.86198	ILMN_1782129	ZBED4	stable	9889
753	0.291796	9.63041	3.52001	0.00360398	0.141144	-1.86665	ILMN_1667707	SPCS3	stable	60559
754	0.363042	8.58849	3.51795	0.00361846	0.141593	-1.8705	ILMN_1717809	RNF24	stable	11237
755	-0.323994	7.56656	-3.51634	0.00362981	0.14192	-1.87351	ILMN_1768469	TCN1	stable	6947
756	0.371616	13.4024	3.50701	0.00369636	0.143384	-1.89093	ILMN_1737988	PRNP	stable	5621
757	0.242712	9.47048	3.50642	0.00370065	0.143384	-1.89205	ILMN_1703226	KTI12	stable	112970
758	0.271062	9.90542	3.50571	0.00370577	0.143394	-1.89337	ILMN_1655921	GTF2E1	stable	2960
759	-0.214389	8.2462	-3.50554	0.00370697	0.143394	-1.89369	ILMN_1701507	EHHADH	stable	1962
760	0.640794	8.24786	3.49977	0.00374883	0.144658	-1.90445	ILMN_1751901	TMEM163	stable	81615
761	-0.227223	10.7969	-3.49426	0.00378933	0.145982	-1.91476	ILMN_1662026	BTK	stable	695
762	-0.388085	10.2889	-3.49265	0.00380122	0.146157	-1.91777	ILMN_1788213	FRAT2	stable	23401
763	0.151466	7.18055	3.49239	0.00380315	0.146157	-1.91825	ILMN_1653092	FAM186A	stable	121006
764	-0.385596	9.99434	-3.49165	0.0038086	0.146247	-1.91963	ILMN_1802380	RERE	stable	473
765	-0.664622	10.4574	-3.49104	0.00381311	0.146301	-1.92076	ILMN_1807359	CLEC11A	stable	6320
766	-0.819651	8.00144	-3.48565	0.00385338	0.147422	-1.93084	ILMN_1659075	HLA-DOA	stable	3111
767	0.329391	7.6044	3.48546	0.0038548	0.147422	-1.93119	ILMN_1812297	CYP26B1	stable	56603
768	-0.306177	7.38117	-3.48483	0.00385951	0.147483	-1.93236	ILMN_1673704	INA	stable	9118
769	-0.248989	7.87272	-3.48267	0.00387577	0.147859	-1.93639	ILMN_1651429	SELENOM	stable	140606
770	-0.172583	7.29669	-3.48149	0.00388474	0.147859	-1.93861	ILMN_1722217	DYNLT2	stable	6991
771	0.759861	12.1466	3.48145	0.00388502	0.147859	-1.93868	ILMN_1779852	FABP5P3	stable	220832
772	-1.00709	8.84748	-3.47936	0.00390085	0.147968	-1.94258	ILMN_1768284	P2RY8	stable	286530
773	-0.218857	7.68955	-3.47751	0.00391493	0.148243	-1.94603	ILMN_1743204	DUSP8	stable	1850
774	0.208993	7.78052	3.47723	0.00391708	0.148243	-1.94656	ILMN_1655644	ZNF804A	stable	91752
775	0.24835	8.86173	3.4763	0.0039242	0.14825	-1.9483	ILMN_1714809	RPIA	stable	22934
776	-0.36601	7.48127	-3.47629	0.00392424	0.14825	-1.94831	ILMN_1664828	APOBEC3H	stable	164668
777	-0.224268	10.1256	-3.47551	0.00393021	0.14825	-1.94977	ILMN_1703650	TNIP1	stable	10318
778	-1.45026	10.2413	-3.47517	0.00393281	0.14825	-1.9504	ILMN_1748473	GIMAP4	stable	55303
779	-0.28288	8.95691	-3.47515	0.00393296	0.14825	-1.95044	ILMN_1789186	STN1	stable	79991
780	-0.44739	9.09812	-3.47452	0.00393783	0.148316	-1.95162	ILMN_1694075	GADD45A	stable	1647
781	0.238839	10.8382	3.47316	0.00394828	0.148591	-1.95416	ILMN_1736008	YRDC	stable	79693
782	-0.635214	8.88082	-3.47035	0.00396997	0.149051	-1.95942	ILMN_1652065	KCNMB1	stable	3779
783	0.316779	12.0088	3.46951	0.00397645	0.149175	-1.96098	ILMN_1667043	EIF4A3	stable	9775
784	-0.147956	7.18747	-3.46635	0.00400097	0.149524	-1.96687	ILMN_3221729	LOC729080	stable	729080
785	-0.21028	7.59492	-3.46572	0.00400591	0.149568	-1.96806	ILMN_1660320	WASF2	stable	10163
786	-0.225193	7.44099	-3.46442	0.00401606	0.149736	-1.97048	ILMN_1710219	CALCR	stable	799
787	0.180678	7.3885	3.46433	0.00401675	0.149736	-1.97065	ILMN_1661307	JRK	stable	8629
788	0.206139	10.9292	3.46172	0.00403726	0.150157	-1.97553	ILMN_1687430	EIF2B4	stable	8890
789	0.261433	9.74763	3.46168	0.0040376	0.150157	-1.97561	ILMN_1746561	BCL2L2	stable	599
790	0.299998	9.41511	3.45746	0.00407094	0.151041	-1.98349	ILMN_1741054	SLC5A6	stable	8884
791	0.313535	9.06346	3.45567	0.0040851	0.151058	-1.98682	ILMN_2082324	SLC36A4	stable	120103
792	-0.317712	7.63978	-3.45542	0.0040871	0.151058	-1.98729	ILMN_1796923	REXO5	stable	81691
793	0.548457	11.0269	3.45538	0.00408741	0.151058	-1.98736	ILMN_1714278	MSANTD3	stable	91283
794	0.189679	7.81569	3.45409	0.00409771	0.151202	-1.98977	ILMN_2206812	CCNJ	stable	54619
795	-0.623522	7.79394	-3.45224	0.00411257	0.151514	-1.99324	ILMN_1763127	ACKR2	stable	1238
796	-0.861157	7.72086	-3.44534	0.00416824	0.153206	-2.00613	ILMN_1808114	LYVE1	stable	10894
797	0.251791	9.47658	3.44478	0.00417276	0.153253	-2.00717	ILMN_1765159	ELMOD2	stable	255520
798	0.319298	11.075	3.44295	0.00418768	0.153681	-2.01058	ILMN_1698605	TMEM43	stable	79188
799	-0.158278	7.36039	-3.43925	0.00421802	0.154555	-2.0175	ILMN_1665492	SORCS1	stable	114815
800	0.356126	11.4329	3.43824	0.00422627	0.154737	-2.01937	ILMN_1790471	CIDECP1	stable	152302
801	0.240059	7.59061	3.43419	0.00425982	0.155845	-2.02695	ILMN_1770663	KRT24	stable	192666
802	-0.226397	10.0033	-3.43342	0.00426619	0.155957	-2.02838	ILMN_1776522	SLC50A1	stable	55974
803	-0.245146	11.2645	-3.43209	0.00427723	0.15624	-2.03086	ILMN_1720083	EHD4	stable	30844
804	-0.480659	8.32943	-3.43073	0.00428864	0.156535	-2.03341	ILMN_1733851	DACT3	stable	147906
805	0.231656	8.49772	3.42931	0.00430053	0.156727	-2.03606	ILMN_1753790	ZPR1	stable	8882
806	0.290243	9.93745	3.42718	0.00431841	0.157257	-2.04003	ILMN_1655307	FAM136A	stable	84908
807	-0.309134	13.3879	-3.42231	0.00435958	0.157917	-2.04912	ILMN_1666385	CALM3	stable	808
808	-0.194471	7.36994	-3.42213	0.0043611	0.157917	-2.04946	ILMN_1764754	RAMP1	stable	10267
809	-0.199711	7.86408	-3.42188	0.00436328	0.157917	-2.04994	ILMN_1811632	FMO5	stable	2330
810	-1.5817	9.27403	-3.41843	0.00439272	0.158861	-2.05637	ILMN_1718984	FCGBP	stable	8857
811	-0.361153	7.37212	-3.41743	0.00440126	0.159048	-2.05824	ILMN_1669876	CUX2	stable	23316
812	-0.176839	8.08626	-3.41683	0.00440645	0.159114	-2.05936	ILMN_1674167	IL10	stable	3586
813	0.167698	7.52392	3.41098	0.004457	0.160816	-2.07029	ILMN_1728450	SLC25A51P1	stable	442229
814	0.230158	7.95876	3.4101	0.00446465	0.160847	-2.07193	ILMN_1679995	PALS2	stable	51678
815	-0.189991	7.65979	-3.40718	0.00449016	0.161274	-2.07739	ILMN_1792597	CRYGS	stable	1427
816	0.363278	11.0823	3.39915	0.00456096	0.163568	-2.09236	ILMN_1710078	TMEM181	stable	57583
817	0.166028	7.80104	3.39585	0.00459047	0.164264	-2.09854	ILMN_1654890	LENG8	stable	114823
818	-0.351053	10.3712	-3.39236	0.00462182	0.165028	-2.10505	ILMN_1751753	IDH2	stable	3418
819	-0.128547	7.06966	-3.39217	0.00462355	0.165028	-2.10541	ILMN_1746658	RORB	stable	6096
820	-0.440836	8.06729	-3.39114	0.00463283	0.165028	-2.10733	ILMN_1672591	SCN9A	stable	6335
821	0.376987	8.63025	3.38766	0.00466438	0.165667	-2.11382	ILMN_1739103	MPZL1	stable	9019
822	-0.719595	12.7212	-3.38758	0.00466509	0.165667	-2.11397	ILMN_1740015	CD14	stable	929
823	0.401281	10.5966	3.3843	0.00469499	0.166257	-2.12009	ILMN_1787718	SLC27A1	stable	376497
824	0.43143	12.8928	3.38355	0.00470188	0.166348	-2.12149	ILMN_1666269	CTSZ	stable	1522
825	0.234816	7.59029	3.38242	0.00471229	0.166591	-2.1236	ILMN_1763267	ZFYVE28	stable	57732
826	-0.359904	9.69898	-3.38125	0.00472304	0.166847	-2.12579	ILMN_1754149	LETMD1	stable	25875
827	0.511778	10.2581	3.37969	0.00473747	0.167231	-2.12871	ILMN_1730491	FMNL2	stable	114793
828	0.626579	9.87701	3.37872	0.00474644	0.167298	-2.13051	ILMN_3248910	MIR155HG	stable	114614
829	0.211563	12.4188	3.37601	0.0047716	0.167934	-2.13557	ILMN_1670609	ATOX1	stable	475
830	-0.126714	7.02142	-3.37508	0.00478028	0.168103	-2.13731	ILMN_1721271	PPP3R2	stable	5535
831	-0.165947	7.23695	-3.37409	0.00478949	0.168188	-2.13915	ILMN_2129600	OR4A15	stable	81328
832	-0.17207	7.54105	-3.37257	0.0048037	0.16853	-2.14199	ILMN_1808132	FAS	stable	355
833	-0.485806	13.7541	-3.37111	0.00481743	0.168667	-2.14472	ILMN_1689655	HLA-DRA	stable	3122
834	-0.250786	7.50119	-3.36503	0.00487486	0.170048	-2.15606	ILMN_1688670	CDCP1	stable	64866
835	0.321538	12.2925	3.36441	0.00488082	0.17013	-2.15723	ILMN_1761912	MGAT1	stable	4245
836	0.264821	8.50499	3.36335	0.00489087	0.170354	-2.15919	ILMN_1681325	CPTP	stable	80772
837	-0.691811	8.48715	-3.36228	0.00490109	0.170585	-2.16119	ILMN_1723520	CD1A	stable	909
838	0.415329	9.61618	3.36126	0.00491084	0.170798	-2.16309	ILMN_1770850	PNMA1	stable	9240
839	-0.204993	7.32673	-3.35989	0.00492404	0.17092	-2.16566	ILMN_1717727	HMSD	stable	284293
840	-0.636466	12.7658	-3.35977	0.0049252	0.17092	-2.16588	ILMN_1703538	AIF1	stable	199
841	0.317996	9.27111	3.35687	0.0049531	0.171636	-2.17129	ILMN_1656293	GOSR2	stable	9570
842	0.173015	7.52366	3.35251	0.0049954	0.17253	-2.17942	ILMN_1730085	LCORL	stable	254251
843	-0.295833	11.2812	-3.35221	0.00499837	0.17253	-2.17999	ILMN_1780825	RRAS	stable	6237
844	-0.27114	7.46241	-3.34739	0.00504555	0.173735	-2.18897	ILMN_1793543	CIART	stable	148523
845	-0.30833	11.7457	-3.34522	0.00506699	0.174032	-2.19303	ILMN_1661346	HNRNPA1	stable	3178
846	-0.163084	7.1893	-3.34469	0.00507223	0.174032	-2.19401	ILMN_1795499	MAML3	stable	55534
847	0.199918	8.00962	3.34281	0.00509088	0.174074	-2.19752	ILMN_1761722	ZNF579	stable	163033
848	-0.820149	8.95104	-3.34109	0.00510805	0.174341	-2.20074	ILMN_2043452	FANCE	stable	2178
849	-0.215418	7.50708	-3.34102	0.00510867	0.174341	-2.20086	ILMN_1690839	PLPP7	stable	84814
850	0.252675	9.35551	3.34055	0.00511342	0.174377	-2.20175	ILMN_1682774	TEX30	stable	93081
851	0.361825	9.95331	3.33992	0.00511968	0.174464	-2.20292	ILMN_1717229	PRXL2C	stable	195827
852	-0.287064	8.25027	-3.3384	0.00513487	0.174785	-2.20575	ILMN_2103919	LRFN3	stable	79414
853	0.401068	8.84057	3.33824	0.00513649	0.174785	-2.20605	ILMN_1671451	HSD17B14	stable	51171
854	0.284845	9.12893	3.33766	0.00514232	0.174857	-2.20714	ILMN_1793508	YAE1	stable	57002
855	-0.17073	7.52431	-3.33672	0.0051518	0.174883	-2.2089	ILMN_1782513	TRMT10B	stable	158234
856	-0.318927	10.1047	-3.33611	0.00515787	0.174883	-2.21002	ILMN_1694106	GPD1L	stable	23171
857	0.404022	9.74496	3.33401	0.00517902	0.175207	-2.21393	ILMN_1659352	KCNK13	stable	56659
858	0.270378	10.285	3.33328	0.00518641	0.175207	-2.2153	ILMN_1735275	WDSUB1	stable	151525
859	0.168373	7.50343	3.33285	0.00519079	0.175207	-2.21611	ILMN_3245893	SNORA1	stable	677792
860	-0.138322	7.14265	-3.33272	0.00519207	0.175207	-2.21634	ILMN_1788118	SLC23A3	stable	151295
861	-0.30843	12.8099	-3.33248	0.00519451	0.175207	-2.21679	ILMN_1685538	RPL4	stable	6124
862	-0.355476	8.86116	-3.33154	0.00520405	0.175316	-2.21854	ILMN_1713174	TCP11L1	stable	55346
863	-0.286556	10.762	-3.3288	0.00523197	0.176005	-2.22366	ILMN_1666553	SLC25A19	stable	60386
864	-0.148815	7.22107	-3.32503	0.00527065	0.176928	-2.2307	ILMN_1657958	LINC01761	stable	440594
865	0.176855	7.90707	3.32458	0.00527525	0.176934	-2.23153	ILMN_1787190	NRP2	stable	8828
866	0.376895	10.0144	3.32373	0.00528407	0.176934	-2.23313	ILMN_2150352	CBWD5	stable	220869
867	-0.292102	9.40336	-3.32322	0.00528923	0.176934	-2.23406	ILMN_1680850	RECQL	stable	5965
868	0.288067	9.66842	3.32306	0.00529093	0.176934	-2.23437	ILMN_1677041	CHUK	stable	1147
869	0.179144	7.5395	3.32303	0.00529124	0.176934	-2.23443	ILMN_1666715	NSD3	stable	54904
870	-0.387803	9.85173	-3.32196	0.00530226	0.176983	-2.23641	ILMN_1653292	PFKFB4	stable	5210
871	0.897086	9.48425	3.3209	0.00531324	0.177224	-2.23839	ILMN_1655990	CDK5RAP2	stable	55755
872	-0.248595	7.34641	-3.32048	0.00531763	0.177246	-2.23918	ILMN_1674593	SIGLEC11	stable	114132
873	0.144749	7.85569	3.31758	0.0053478	0.177723	-2.24459	ILMN_1741585	SFMBT1	stable	51460
874	0.268835	8.75474	3.31482	0.00537668	0.178208	-2.24973	ILMN_1716057	CAPN2	stable	824
875	0.169124	8.18241	3.31008	0.00542667	0.179266	-2.25858	ILMN_1798083	CHERP	stable	10523
876	-0.434773	8.37675	-3.30964	0.00543137	0.179266	-2.2594	ILMN_1652525	MVB12B	stable	89853
877	-0.265531	10.0064	-3.30821	0.00544656	0.179641	-2.26207	ILMN_1729281	SPHK2	stable	56848
878	-0.294775	10.9533	-3.30655	0.00546416	0.179955	-2.26515	ILMN_1786328	DCAF12	stable	25853
879	-0.366505	8.39428	-3.30603	0.00546973	0.179955	-2.26613	ILMN_1754660	ZCCHC24	stable	219654
880	0.14804	7.46309	3.30431	0.00548813	0.180083	-2.26934	ILMN_1714569	CDK16	stable	5127
881	0.547239	10.1983	3.3041	0.00549044	0.180083	-2.26974	ILMN_1791726	TUBB3	stable	10381
882	0.288384	10.5533	3.30343	0.00549756	0.180138	-2.27097	ILMN_1788347	CIPC	stable	85457
883	-0.126817	7.14945	-3.30254	0.00550711	0.180254	-2.27263	ILMN_1777556	SOAT2	stable	8435
884	-0.188594	7.65656	-3.30071	0.00552681	0.180553	-2.27604	ILMN_1814661	PHLPP1	stable	23239
885	-0.365629	8.34635	-3.30063	0.00552773	0.180553	-2.2762	ILMN_1749799	HMGN5	stable	79366
886	-0.442732	10.1203	-3.29873	0.00554822	0.180972	-2.27974	ILMN_1695640	PTPN22	stable	26191
887	0.4195	9.57276	3.29837	0.00555217	0.180976	-2.28042	ILMN_1812688	SLC35F6	stable	54978
888	-0.390348	9.33014	-3.29702	0.00556685	0.181304	-2.28294	ILMN_1813671	SLC25A1	stable	6576
889	-0.289797	7.69172	-3.29608	0.00557703	0.181304	-2.28468	ILMN_1755792	STK38L	stable	23012
890	0.256961	8.07436	3.29603	0.00557758	0.181304	-2.28478	ILMN_1741455	USP30	stable	84749
891	0.177829	8.48463	3.2944	0.0055953	0.181578	-2.28781	ILMN_1805792	TRIO	stable	7204
892	-0.296785	10.4687	-3.29391	0.00560067	0.181578	-2.28872	ILMN_1800602	GCA	stable	25801
893	0.236304	12.9225	3.29296	0.00561114	0.181578	-2.29051	ILMN_1703006	MTCH1	stable	23787
894	0.411419	9.45991	3.29279	0.00561291	0.181578	-2.29081	ILMN_1730504	AGPAT4	stable	56895
895	0.42599	10.5965	3.29231	0.00561826	0.181626	-2.29172	ILMN_1703074	CPD	stable	1362
896	-0.266585	7.53281	-3.29017	0.00564177	0.182254	-2.29571	ILMN_2197128	OSR1	stable	130497
897	0.181654	7.8138	3.28984	0.00564538	0.182254	-2.29632	ILMN_1670664	PPP1R15B	stable	84919
898	-0.317014	9.48698	-3.28839	0.00566133	0.182643	-2.29901	ILMN_1720850	BAZ2B	stable	29994
899	-0.32259	7.6317	-3.28721	0.00567439	0.18294	-2.30121	ILMN_1702899	PLEKHA7	stable	144100
900	-0.340964	8.54338	-3.28656	0.00568158	0.183047	-2.30242	ILMN_1811574	MAPK8IP3	stable	23162
901	0.535961	9.2155	3.28574	0.0056907	0.183149	-2.30395	ILMN_1687335	FLNA	stable	2316
902	0.388856	11.3889	3.28307	0.0057205	0.183924	-2.30894	ILMN_1755077	HEBP2	stable	23593
903	0.563816	8.03064	3.28212	0.00573109	0.184139	-2.3107	ILMN_1761084	FNDC5	stable	252995
904	-0.420124	9.17328	-3.27982	0.00575684	0.184716	-2.31499	ILMN_1655612	ARRDC2	stable	27106
905	-0.773328	11.1567	-3.27891	0.00576716	0.184874	-2.3167	ILMN_1786429	LPAR6	stable	10161
906	0.316717	8.93404	3.27869	0.00576959	0.184874	-2.3171	ILMN_1731412	UBTD2	stable	92181
907	-0.139287	7.18636	-3.27611	0.00579872	0.185681	-2.3219	ILMN_2211739	SLC15A2	stable	6565
908	0.141268	7.3227	3.27485	0.00581301	0.186012	-2.32425	ILMN_1720498	TMEM120B	stable	144404
909	-0.209927	10.1686	-3.27441	0.00581795	0.186042	-2.32507	ILMN_1678707	TAF15	stable	8148
910	-0.22145	11.6128	-3.27407	0.00582181	0.186042	-2.3257	ILMN_1801606	AMZ2	stable	51321
911	0.259463	7.66836	3.27342	0.00582924	0.186154	-2.32692	ILMN_1685057	SLC22A4	stable	6583
912	-0.418691	7.46882	-3.2715	0.00585119	0.186602	-2.3305	ILMN_1780799	ENPP2	stable	5168
913	-0.408624	11.0877	-3.2692	0.00587748	0.187062	-2.33478	ILMN_1682717	IER3	stable	8870
914	-0.588485	11.1088	-3.26874	0.00588273	0.187102	-2.33563	ILMN_1804328	WWP1	stable	11059
915	0.169395	7.45945	3.26761	0.00589573	0.18739	-2.33774	ILMN_1660973	GAD1	stable	2571
916	0.526967	9.08719	3.26671	0.00590613	0.187594	-2.33942	ILMN_1808566	MFSD13A	stable	79847
917	-0.400917	8.72796	-3.2659	0.00591547	0.187677	-2.34093	ILMN_1688103	CTNNBIP1	stable	56998
918	-0.206118	7.65134	-3.26574	0.00591736	0.187677	-2.34124	ILMN_1720249	GNAS	stable	2778
919	0.38327	9.80571	3.26252	0.00595467	0.188502	-2.34724	ILMN_1782618	BBLN	stable	79095
920	0.202843	7.80407	3.25874	0.00599877	0.18939	-2.35428	ILMN_1753795	SOCS4	stable	122809
921	-0.220294	10.3485	-3.25744	0.00601392	0.189742	-2.35668	ILMN_1683664	SINHCAF	stable	58516
922	0.201456	9.92996	3.25649	0.00602512	0.189911	-2.35846	ILMN_1672024	ISCA1	stable	81689
923	0.805008	8.49208	3.2529	0.00606749	0.190967	-2.36515	ILMN_1746888	PCOLCE2	stable	26577
924	0.483944	8.14014	3.25278	0.00606892	0.190967	-2.36537	ILMN_1699978	TMEM255A	stable	55026
925	0.462016	9.39751	3.25218	0.00607602	0.191063	-2.36649	ILMN_3237329	FNIP2	stable	57600
926	0.540373	12.1923	3.24832	0.00612205	0.191999	-2.37369	ILMN_1701731	AKR1B1	stable	231
927	0.223726	8.01756	3.24663	0.00614223	0.192504	-2.37683	ILMN_1727761	GMEB1	stable	10691
928	0.480142	12.0702	3.24517	0.00615977	0.192793	-2.37954	ILMN_1723486	HK2	stable	3099
929	0.517376	10.5744	3.24467	0.00616584	0.192793	-2.38049	ILMN_1780302	DYNC1H1	stable	1778
930	-0.254403	8.01599	-3.24462	0.00616641	0.192793	-2.38057	ILMN_1815366	ENGASE	stable	64772
931	-0.216517	7.66936	-3.24419	0.0061716	0.192793	-2.38137	ILMN_1693740	DNAJC3-DT	stable	100289274
932	0.215843	7.98206	3.24304	0.00618543	0.193089	-2.38351	ILMN_3248301	ZNF583	stable	147949
933	0.361526	8.45778	3.24141	0.00620518	0.193566	-2.38655	ILMN_1805842	FHL1	stable	2273
934	-0.189598	10.0481	-3.23856	0.00623983	0.194261	-2.39186	ILMN_1696675	CES2	stable	8824
935	-0.176161	7.33001	-3.23718	0.00625663	0.194541	-2.39443	ILMN_1652490	MANSC1	stable	54682
936	0.286043	9.49162	3.23408	0.0062946	0.19557	-2.4002	ILMN_2064694	STIM1	stable	6786
937	0.22708	10.2485	3.2336	0.00630051	0.19557	-2.40109	ILMN_1713322	CCZ1B	stable	221960
938	-0.142697	7.08723	-3.23158	0.00632544	0.196006	-2.40486	ILMN_2293393	ZNF623	stable	9831
939	-0.287039	9.92159	-3.23139	0.00632779	0.196006	-2.40521	ILMN_1737561	N4BP2L2	stable	10443
940	-0.249077	10.5789	-3.23131	0.00632867	0.196006	-2.40534	ILMN_1676955	TYK2	stable	7297
941	0.693791	9.93116	3.2288	0.00635981	0.196713	-2.41002	ILMN_2112357	CD300LF	stable	146722
942	0.198618	7.75794	3.22726	0.00637899	0.197177	-2.4129	ILMN_2181089	DCAF1	stable	9730
943	0.370926	10.4395	3.22638	0.00638998	0.197387	-2.41454	ILMN_1765146	IFNAR2	stable	3455
944	-0.426041	10.7727	-3.2212	0.00645488	0.199002	-2.42417	ILMN_1760062	IFI44	stable	10561
945	0.152987	7.88674	3.21891	0.00648375	0.19954	-2.42842	ILMN_1781104	MAP2K7	stable	5609
946	-0.204639	8.45042	-3.21891	0.00648383	0.19954	-2.42844	ILMN_1683328	IP6K2	stable	51447
947	-0.209557	7.76368	-3.21848	0.00648924	0.19954	-2.42923	ILMN_1774287	CFB	stable	629
948	0.421275	7.79072	3.21664	0.00651254	0.199879	-2.43265	ILMN_1663519	SLC24A3	stable	57419
949	0.219874	7.93937	3.2166	0.00651316	0.199879	-2.43274	ILMN_1680465	ARL5B	stable	221079
950	0.19504	7.208	3.21628	0.00651719	0.199879	-2.43333	ILMN_1652244	POPDC3	stable	64208
951	-0.95072	8.06179	-3.21565	0.00652516	0.199924	-2.43449	ILMN_1727532	OLFML3	stable	56944
952	-0.393339	7.67173	-3.21392	0.00654724	0.200151	-2.43771	ILMN_1665943	MAP4K1	stable	11184
953	0.313189	8.30852	3.21245	0.00656611	0.200338	-2.44046	ILMN_1701077	N6AMT1	stable	29104
954	0.272839	13.2176	3.20816	0.00662133	0.201373	-2.44844	ILMN_2363586	SDCBP	stable	6386
955	0.154377	7.79764	3.20726	0.00663297	0.201597	-2.45011	ILMN_1658746	HACD3	stable	51495
956	-0.552734	9.5343	-3.20547	0.00665615	0.201956	-2.45344	ILMN_1661599	DDIT4	stable	54541
957	0.204973	9.4499	3.20527	0.00665878	0.201956	-2.45381	ILMN_1761911	GORAB	stable	92344
958	0.25263	13.1801	3.2026	0.00669361	0.202657	-2.45878	ILMN_1761804	ALDH9A1	stable	223
959	0.195715	7.65656	3.19967	0.00673203	0.20356	-2.46424	ILMN_1750896	STX17	stable	55014
960	0.113064	7.4001	3.19794	0.0067547	0.204109	-2.46744	ILMN_1701918	KLHDC9	stable	126823
961	-0.429629	9.78295	-3.19691	0.00676838	0.204121	-2.46937	ILMN_1721046	PTMS	stable	5763
962	-0.281759	7.67062	-3.19662	0.0067722	0.204121	-2.4699	ILMN_1668876	HECTD2	stable	143279
963	0.29476	8.93001	3.19365	0.00681154	0.204846	-2.47542	ILMN_1782110	ZBTB21	stable	49854
964	0.201173	8.33153	3.1935	0.00681361	0.204846	-2.47571	ILMN_1815361	XIAP	stable	331
965	-1.08885	8.59619	-3.19256	0.00682608	0.205051	-2.47745	ILMN_1754076	CACNA2D3	stable	55799
966	0.262933	9.85432	3.18745	0.00689456	0.206407	-2.48696	ILMN_1738736	SNX4	stable	8723
967	0.112084	7.32377	3.18601	0.0069139	0.206666	-2.48963	ILMN_1781390	FGF17	stable	8822
968	-0.193672	8.05713	-3.18539	0.00692228	0.206666	-2.49078	ILMN_1779600	DSTYK	stable	25778
969	-0.347176	8.69911	-3.18416	0.00693898	0.207007	-2.49308	ILMN_1756862	APOL3	stable	80833
970	0.412844	9.2669	3.18389	0.00694259	0.207007	-2.49357	ILMN_2054392	PPIL1	stable	51645
971	-0.157343	7.2119	-3.18358	0.00694685	0.207007	-2.49416	ILMN_1724096	TNK1	stable	8711
972	0.411652	9.49027	3.1832	0.00695194	0.207028	-2.49485	ILMN_1811050	CCDC88A	stable	55704
973	0.270912	7.98216	3.18247	0.00696183	0.207062	-2.49621	ILMN_1693878	GMPPA	stable	29926
974	0.293243	8.68185	3.18135	0.00697714	0.207155	-2.4983	ILMN_2186369	NCOR1	stable	9611
975	0.227908	8.29521	3.18128	0.00697811	0.207155	-2.49843	ILMN_1770373	TMEM39A	stable	55254
976	-0.153639	7.22174	-3.18063	0.00698687	0.207189	-2.49963	ILMN_1697418	RBFOX2	stable	23543
977	0.354173	10.245	3.17995	0.00699616	0.207222	-2.50089	ILMN_1657446	NTPCR	stable	84284
978	-0.460791	10.3966	-3.17982	0.00699793	0.207222	-2.50113	ILMN_1741200	RFX5	stable	5993
979	-0.291802	7.2276	-3.17903	0.0070088	0.207414	-2.50261	ILMN_1684758	ETFB	stable	2109
980	-0.233593	12.4909	-3.1782	0.00702013	0.207619	-2.50415	ILMN_1804530	ARPC1B	stable	10095
981	0.198265	7.23535	3.17738	0.00703143	0.207693	-2.50568	ILMN_1715567	C12orf50	stable	160419
982	0.161294	7.57467	3.17591	0.00705154	0.208157	-2.5084	ILMN_1792990	ZNF202	stable	7753
983	0.269776	9.54519	3.17449	0.00707121	0.208179	-2.51105	ILMN_1701375	FBXW5	stable	54461
984	0.547382	9.77769	3.17426	0.00707431	0.208179	-2.51147	ILMN_1693771	ASPH	stable	444
985	-0.194877	7.71598	-3.17149	0.00711275	0.208919	-2.51663	ILMN_2173891	FAAP24	stable	91442
986	0.358149	9.15101	3.16985	0.00713555	0.209261	-2.51968	ILMN_1684576	CLN8	stable	2055
987	0.221773	9.45111	3.16933	0.00714268	0.209278	-2.52063	ILMN_1733930	PREB	stable	10113
988	-0.332265	7.86189	-3.16736	0.00717023	0.209825	-2.52429	ILMN_1704084	CMAHP	stable	8418
989	0.272515	10.4143	3.16589	0.00719092	0.210009	-2.52703	ILMN_1807201	FAM104A	stable	84923
990	0.19379	8.26534	3.16579	0.00719222	0.210009	-2.52721	ILMN_1792107	ERCC8	stable	1161
991	-0.224457	12.643	-3.16493	0.00720436	0.210068	-2.52881	ILMN_2290808	RPL21	stable	6144
992	-0.151885	7.15587	-3.16487	0.00720523	0.210068	-2.52893	ILMN_1714936	CCDC142	stable	84865
993	-0.256641	8.38835	-3.16249	0.00723878	0.210526	-2.53335	ILMN_1737857	GTF2B	stable	2959
994	-0.189074	11.318	-3.16118	0.00725727	0.210853	-2.53577	ILMN_1689446	EIF3G	stable	8666
995	-0.16424	7.17815	-3.16029	0.00726986	0.210853	-2.53742	ILMN_1777550	ARL13A	stable	392509
996	-0.333617	9.70515	-3.16012	0.00727234	0.210853	-2.53775	ILMN_1799467	SAMD9L	stable	219285
997	0.36344	7.80187	3.15938	0.00728286	0.211029	-2.53912	ILMN_3240901	ZBTB7C	stable	201501
998	-0.197705	13.0748	-3.15777	0.00730577	0.211433	-2.54211	ILMN_1749447	RPS9	stable	6203
999	-0.807093	9.71736	-3.15423	0.00735648	0.212689	-2.5487	ILMN_1809467	VAMP5	stable	10791
1000	0.139906	7.27692	3.15379	0.00736269	0.212689	-2.5495	ILMN_1719599	SYTL4	stable	94121
1001	0.484299	9.3855	3.15274	0.00737788	0.212997	-2.55146	ILMN_1677768	POR	stable	5447
1002	-0.673258	8.0805	-3.15243	0.00738236	0.212997	-2.55204	ILMN_1723912	IFI44L	stable	10964
1003	-0.225052	7.39394	-3.15179	0.00739148	0.21313	-2.55321	ILMN_1663648	MTUS1	stable	57509
1004	-0.179812	7.15589	-3.14999	0.00741761	0.213753	-2.55657	ILMN_1753271	B4GALNT3	stable	283358
1005	-0.150093	7.21055	-3.14887	0.00743379	0.214089	-2.55864	ILMN_1664124	FLJ13224	stable	79857
1006	0.122927	7.27449	3.14586	0.00747764	0.214742	-2.56424	ILMN_1653146	MSH4	stable	4438
1007	0.205362	7.99246	3.14535	0.0074851	0.214742	-2.56519	ILMN_2234412	TLE3	stable	7090
1008	0.157733	7.42605	3.14492	0.00749131	0.214742	-2.56598	ILMN_1777060	CTH	stable	1491
1009	-0.175035	8.11498	-3.14193	0.00753523	0.215032	-2.57154	ILMN_1810436	DNAJC27	stable	51277
1010	0.204181	9.98095	3.14192	0.00753524	0.215032	-2.57154	ILMN_1681008	CGRRF1	stable	10668
1011	0.434768	8.65964	3.14187	0.00753606	0.215032	-2.57164	ILMN_1710495	PAPLN	stable	89932
1012	-0.221101	9.09306	-3.14164	0.00753939	0.215032	-2.57206	ILMN_1681118	CAPRIN2	stable	65981
1013	0.993665	8.76809	3.1403	0.0075592	0.215226	-2.57456	ILMN_1704537	PHGDH	stable	26227
1014	0.451883	9.47307	3.14013	0.00756167	0.215226	-2.57487	ILMN_1815745	SOX4	stable	6659
1015	-0.361183	8.09397	-3.1394	0.00757245	0.215325	-2.57622	ILMN_1767377	GUSBP14	stable	11039
1016	-0.575526	11.6857	-3.13857	0.00758467	0.215531	-2.57776	ILMN_1682312	CYBB	stable	1536
1017	0.656893	9.69439	3.13596	0.00762341	0.21577	-2.5826	ILMN_1710124	CMTM8	stable	152189
1018	0.277388	8.5147	3.13304	0.00766699	0.216388	-2.58802	ILMN_1709623	MAPK7	stable	5598
1019	-0.174922	13.9071	-3.13224	0.00767897	0.216388	-2.58951	ILMN_1686954	RPS10	stable	6204
1020	-0.156596	7.21674	-3.13152	0.0076898	0.216388	-2.59085	ILMN_1697220	NT5E	stable	4907
1021	-0.116495	7.13763	-3.13144	0.00769107	0.216388	-2.591	ILMN_1651685	FAM135B	stable	51059
1022	0.206794	8.35132	3.13126	0.00769379	0.216388	-2.59134	ILMN_1812169	SERAC1	stable	84947
1023	-0.133852	7.19005	-3.13115	0.00769533	0.216388	-2.59153	ILMN_1676088	MSRB3	stable	253827
1024	0.655143	9.81432	3.13079	0.00770084	0.216388	-2.59221	ILMN_1701025	EPHX1	stable	2052
1025	-0.549951	8.67263	-3.12897	0.00772812	0.216847	-2.59557	ILMN_1803906	ETV2	stable	2116
1026	-0.220132	11.3655	-3.12852	0.00773497	0.216847	-2.59642	ILMN_1662843	CD53	stable	963
1027	0.201776	9.59512	3.12765	0.0077481	0.216847	-2.59803	ILMN_1716730	BOD1	stable	91272
1028	0.184782	8.22267	3.12698	0.0077582	0.216847	-2.59927	ILMN_1742872	UBA2	stable	10054
1029	-0.226673	7.20463	-3.12685	0.00776029	0.216847	-2.59952	ILMN_1699354	EPHA2	stable	1969
1030	-0.588225	7.73315	-3.12631	0.00776833	0.216847	-2.60051	ILMN_1678842	THBS2	stable	7058
1031	0.337778	8.66252	3.12461	0.00779415	0.21716	-2.60366	ILMN_1785768	PDE4A	stable	5141
1032	0.682225	8.79888	3.12331	0.00781409	0.217228	-2.60609	ILMN_1810560	NUPR1	stable	26471
1033	0.176862	7.28693	3.12024	0.00786097	0.218188	-2.61178	ILMN_1671997	PVALEF	stable	388428
1034	-0.339406	8.64141	-3.12021	0.00786137	0.218188	-2.61183	ILMN_1755954	CPEB3	stable	22849
1035	0.222131	11.3301	3.12014	0.00786254	0.218188	-2.61197	ILMN_1741957	RABEPK	stable	10244
1036	-0.243853	8.46271	-3.11758	0.00790191	0.218742	-2.61672	ILMN_1811261	KRIT1	stable	889
1037	-0.137841	8.6227	-3.11708	0.00790963	0.218742	-2.61764	ILMN_1762549	LTO1	stable	220064
1038	-0.172263	7.59347	-3.11693	0.00791197	0.218742	-2.61792	ILMN_1710726	APOBEC3F	stable	200316
1039	0.192922	9.69012	3.11661	0.0079169	0.218742	-2.61852	ILMN_1721729	MED1	stable	5469
1040	0.154845	7.37528	3.11537	0.00793604	0.218813	-2.62081	ILMN_1745299	FABP7	stable	2173
1041	-0.544031	7.79693	-3.11504	0.00794118	0.218827	-2.62143	ILMN_2216637	STK32B	stable	55351
1042	-0.224738	8.61806	-3.11428	0.00795297	0.219024	-2.62284	ILMN_1726289	RESF1	stable	55196
1043	-0.368544	7.88398	-3.11312	0.00797091	0.219135	-2.62498	ILMN_1673681	SLC46A1	stable	113235
1044	0.393635	10.1804	3.11224	0.00798464	0.219385	-2.62661	ILMN_1676548	BZW2	stable	28969
1045	-0.193772	7.30587	-3.11042	0.00801303	0.219781	-2.62999	ILMN_1776861	HAP1	stable	9001
1046	-0.175543	7.32366	-3.10964	0.00802528	0.219862	-2.63144	ILMN_1746349	TSPAN19	stable	144448
1047	-0.449263	7.41798	-3.10815	0.00804862	0.220374	-2.6342	ILMN_1696380	GHRL	stable	51738
1048	0.149987	7.13626	3.10703	0.00806624	0.220728	-2.63628	ILMN_1725889	AFF2	stable	2334
1049	0.299032	9.5082	3.10538	0.00809222	0.220799	-2.63933	ILMN_1741253	UBR5	stable	51366
1050	0.180198	9.81033	3.10467	0.00810345	0.220924	-2.64065	ILMN_3236244	C1orf174	stable	339448
1051	0.348824	8.14479	3.1045	0.00810615	0.220924	-2.64097	ILMN_1671486	HOMER2	stable	9455
1052	0.407451	8.36578	3.10297	0.00813046	0.221242	-2.64381	ILMN_1726704	RSC1A1	stable	6248
1053	0.169524	7.29161	3.10229	0.00814124	0.221242	-2.64507	ILMN_1657058	PPIL6	stable	285755
1054	0.200872	8.24018	3.09811	0.0082078	0.222795	-2.6528	ILMN_1684770	USF2	stable	7392
1055	-0.172533	7.513	-3.09752	0.00821722	0.222922	-2.65389	ILMN_1666625	KIF17	stable	57576
1056	-0.526838	9.94845	-3.09474	0.00826206	0.223673	-2.65906	ILMN_1811114	SDS	stable	10993
1057	0.430182	10.2956	3.09473	0.00826217	0.223673	-2.65908	ILMN_1679912	DPH3	stable	285381
1058	-0.215713	8.14193	-3.09417	0.00827123	0.223673	-2.66012	ILMN_1677868	ADRA2B	stable	151
1059	0.235332	9.11757	3.09313	0.00828791	0.22394	-2.66203	ILMN_1655194	JADE1	stable	79960
1060	0.467204	12.0617	3.09098	0.00832286	0.224755	-2.66603	ILMN_1654118	BCL2L1	stable	598
1061	0.27367	9.4887	3.09051	0.00833053	0.224834	-2.6669	ILMN_1728435	NOPCHAP1	stable	121053
1062	-0.167577	9.86591	-3.08836	0.00836549	0.225391	-2.67088	ILMN_1786920	KDM5A	stable	5927
1063	0.187773	9.34206	3.08668	0.00839289	0.225561	-2.67398	ILMN_1728965	NKAPD1	stable	55216
1064	0.209994	7.49031	3.08626	0.00839981	0.225561	-2.67477	ILMN_3237376	GRAMD1B	stable	57476
1065	0.23757	8.57032	3.08622	0.00840046	0.225561	-2.67484	ILMN_1707534	NKRF	stable	55922
1066	0.274399	12.2548	3.08467	0.00842588	0.225987	-2.67771	ILMN_1714820	ITGB1	stable	3688
1067	0.373039	11.0115	3.0841	0.00843528	0.226008	-2.67877	ILMN_1656335	RIT1	stable	6016
1068	0.196143	8.69246	3.08263	0.00845952	0.226117	-2.68149	ILMN_1658526	RYK	stable	6259
1069	-0.273612	12.3985	-3.08234	0.00846426	0.226117	-2.68202	ILMN_1774334	HIGD2A	stable	192286
1070	-0.451325	10.0338	-3.08166	0.00847544	0.226288	-2.68328	ILMN_1738992	MNDA	stable	4332
1071	0.223028	9.00137	3.07911	0.00851781	0.227291	-2.68801	ILMN_1700001	TCTA	stable	6988
1072	0.297254	8.18854	3.07856	0.00852693	0.227379	-2.68903	ILMN_2078592	ADTRP	stable	84830
1073	0.158103	7.86734	3.07733	0.00854741	0.227379	-2.69131	ILMN_1746317	NUP58	stable	9818
1074	0.17569	12.912	3.07689	0.00855476	0.227379	-2.69212	ILMN_1739946	VKORC1	stable	79001
1075	-0.91924	10.214	-3.07659	0.00855978	0.227379	-2.69268	ILMN_1737918	C1QA	stable	712
1076	0.20929	13.4574	3.07605	0.00856876	0.227379	-2.69367	ILMN_1769118	SEPTIN9	stable	10801
1077	0.219397	9.5697	3.07602	0.00856926	0.227379	-2.69373	ILMN_1721575	VPS18	stable	57617
1078	-0.321592	10.4714	-3.0756	0.00857638	0.227379	-2.69452	ILMN_3238269	NDUFA6	stable	4700
1079	0.142167	7.30737	3.07036	0.00866441	0.229091	-2.70421	ILMN_1680424	CTSG	stable	1511
1080	0.292351	10.9476	3.06959	0.00867743	0.229091	-2.70563	ILMN_1790461	UQCC2	stable	84300
1081	0.145734	7.43595	3.06537	0.00874918	0.229959	-2.71345	ILMN_2052686	LCA5	stable	167691
1082	0.228197	9.47063	3.06536	0.00874926	0.229959	-2.71346	ILMN_1758963	NADK	stable	65220
1083	0.146274	7.09716	3.06491	0.00875696	0.230033	-2.71429	ILMN_1791653	TRPM1	stable	4308
1084	0.234412	12.0385	3.06367	0.00877816	0.230293	-2.71659	ILMN_1747598	PPP1R11	stable	6992
1085	0.132454	8.03575	3.06127	0.00881932	0.230893	-2.72103	ILMN_1702592	WDR73	stable	84942
1086	-0.456553	10.0031	-3.06085	0.00882655	0.230893	-2.7218	ILMN_1779252	TRIM22	stable	10346
1087	0.159338	7.22965	3.05995	0.00884214	0.230902	-2.72348	ILMN_1674533	TRPV6	stable	55503
1088	0.140901	7.17142	3.05966	0.00884715	0.230902	-2.72402	ILMN_1907326	TDRG1	stable	732253
1089	-0.181033	7.50841	-3.0573	0.00888799	0.231799	-2.72839	ILMN_1677363	TMEM253	stable	643382
1090	-0.41633	9.029	-3.05686	0.00889555	0.231868	-2.72919	ILMN_1729417	GNE	stable	10020
1091	0.372176	9.19657	3.05567	0.00891625	0.23228	-2.7314	ILMN_1693233	KIAA0513	stable	9764
1092	-0.170456	7.1032	-3.05447	0.00893716	0.23244	-2.73362	ILMN_3310735	MIR873	stable	100126316
1093	-1.07562	9.33004	-3.05397	0.00894584	0.232538	-2.73454	ILMN_2044453	LPAR5	stable	57121
1094	0.187862	7.61397	3.05259	0.00896988	0.232906	-2.73709	ILMN_1692056	HS3ST3A1	stable	9955
1095	0.359749	9.50125	3.05151	0.00898884	0.233064	-2.73909	ILMN_1787843	HSDL2	stable	84263
1096	0.212406	10.0619	3.0514	0.00899077	0.233064	-2.73929	ILMN_1805812	TOR1A	stable	1861
1097	0.217165	9.6604	3.0498	0.00901888	0.233537	-2.74225	ILMN_1700232	FBXO30	stable	84085
1098	0.329308	10.8621	3.04772	0.00905542	0.233842	-2.74609	ILMN_1811592	ARHGAP21	stable	57584
1099	-0.158436	7.17722	-3.0477	0.0090558	0.233842	-2.74613	ILMN_1745713	STKLD1	stable	169436
1100	-0.220997	12.4806	-3.0475	0.00905942	0.233842	-2.74651	ILMN_1778242	CALM1	stable	801
1101	0.919854	9.10128	3.04719	0.00906483	0.233842	-2.74707	ILMN_1712475	HS3ST2	stable	9956
1102	0.226236	12.1662	3.04403	0.00912094	0.234303	-2.75292	ILMN_1803624	TMEM147	stable	10430
1103	-0.60366	9.45053	-3.04256	0.00914706	0.234684	-2.75564	ILMN_1798108	ARMT1	stable	79624
1104	-0.393943	9.87444	-3.0421	0.00915521	0.23475	-2.75648	ILMN_1813669	ANKS1A	stable	23294
1105	0.348498	10.0603	3.03945	0.00920274	0.235151	-2.76139	ILMN_1702683	SLC33A1	stable	9197
1106	-0.165798	9.39629	-3.03916	0.00920783	0.235151	-2.76191	ILMN_1703288	TMEM259	stable	91304
1107	0.271459	10.7597	3.0388	0.00921442	0.235151	-2.76259	ILMN_1749521	SLC35E3	stable	55508
1108	-0.455776	10.8617	-3.03828	0.0092237	0.235151	-2.76355	ILMN_1758418	TNFSF13B	stable	10673
1109	-0.320588	10.4407	-3.038	0.00922876	0.235151	-2.76407	ILMN_1764577	MFNG	stable	4242
1110	-0.191796	10.3487	-3.0379	0.00923058	0.235151	-2.76425	ILMN_1666713	LYPLA1	stable	10434
1111	0.208963	8.94721	3.03527	0.00927798	0.235662	-2.76911	ILMN_1659099	ROCK2	stable	9475
1112	0.155227	7.91827	3.03526	0.00927824	0.235662	-2.76914	ILMN_3235196	ARRDC3-AS1	stable	100129716
1113	-0.335749	8.47415	-3.03401	0.00930077	0.235687	-2.77144	ILMN_1793241	SRD5A1	stable	6715
1114	-0.341894	8.0798	-3.0328	0.00932284	0.235974	-2.77368	ILMN_1654630	FAM193B	stable	54540
1115	-0.231321	7.65694	-3.03246	0.009329	0.236003	-2.77431	ILMN_1724236	FUT7	stable	2529
1116	0.184244	10.2808	3.03093	0.00935681	0.236327	-2.77713	ILMN_1683305	COMMD2	stable	51122
1117	-0.153006	7.38244	-3.02919	0.00938853	0.236622	-2.78034	ILMN_1693674	TRDN	stable	10345
1118	-0.190647	8.05925	-3.02767	0.00941651	0.237201	-2.78316	ILMN_1813763	SLC20A2	stable	6575
1119	-0.197477	12.8945	-3.02657	0.0094367	0.237393	-2.78519	ILMN_1659405	RPL31	stable	6160
1120	-0.453074	10.661	-3.02327	0.00949748	0.238731	-2.79127	ILMN_1765076	APPL2	stable	55198
1121	0.153867	7.4939	3.02176	0.00952553	0.239309	-2.79407	ILMN_1717886	PKHD1L1	stable	93035
1122	-0.157943	7.58518	-3.0211	0.00953781	0.23949	-2.79529	ILMN_1760247	CD70	stable	970
1123	-0.227088	12.0063	-3.01903	0.00957642	0.239949	-2.79912	ILMN_1737738	NDUFA12	stable	55967
1124	-0.134584	7.12157	-3.01832	0.0095896	0.240152	-2.80042	ILMN_1734748	LILRA1	stable	11024
1125	-0.357863	9.87043	-3.01689	0.00961639	0.24026	-2.80306	ILMN_1676361	ARHGAP22	stable	58504
1126	-0.152431	7.17559	-3.01652	0.00962337	0.24026	-2.80375	ILMN_1675927	NEBL	stable	10529
1127	-0.131748	7.26004	-3.01645	0.00962469	0.24026	-2.80388	ILMN_1717059	ZSCAN5B	stable	342933
1128	0.152147	7.48963	3.01619	0.00962954	0.24026	-2.80436	ILMN_1805561	SLC14A1	stable	6563
1129	0.415034	10.8419	3.01438	0.00966353	0.240834	-2.8077	ILMN_1764383	MCOLN1	stable	57192
1130	0.244044	9.51928	3.0138	0.00967456	0.240834	-2.80878	ILMN_1696568	ATP2C1	stable	27032
1131	0.224759	8.96177	3.01361	0.00967802	0.240834	-2.80911	ILMN_1747204	HTRA2	stable	27429
1132	-0.183982	7.38043	-3.01166	0.00971488	0.241499	-2.81272	ILMN_1807609	SPTBN5	stable	51332
1133	0.214115	7.80669	3.01139	0.00971994	0.241499	-2.81321	ILMN_3176790	UBXN2B	stable	137886
1134	0.237293	8.94047	3.01089	0.00972956	0.241607	-2.81415	ILMN_1783702	MORC3	stable	23515
1135	0.135498	7.12537	3.00915	0.0097626	0.242286	-2.81736	ILMN_1684865	GPR22	stable	2845
1136	0.145187	7.37654	3.00864	0.00977229	0.242286	-2.8183	ILMN_1812134	EMSY	stable	56946
1137	-0.109083	7.07889	-3.00797	0.00978498	0.242298	-2.81953	ILMN_3309148	MIR556	stable	693141
1138	0.159711	9.8383	3.00746	0.00979471	0.242298	-2.82047	ILMN_1657436	FGFR1OP2	stable	26127
1139	0.281898	9.6651	3.00727	0.00979844	0.242298	-2.82083	ILMN_1810055	FAM234A	stable	83986
1140	0.229829	9.54018	3.00601	0.00982249	0.242593	-2.82315	ILMN_1688479	LRRC42	stable	115353
1141	-0.3813	10.2144	-3.00544	0.00983335	0.242593	-2.8242	ILMN_1728426	INPPL1	stable	3636
1142	-0.319649	10.5589	-3.005	0.00984186	0.242593	-2.82501	ILMN_1777061	ZSWIM6	stable	57688
1143	0.597311	9.28301	3.00478	0.00984605	0.242593	-2.82542	ILMN_1755649	SLC16A5	stable	9121
1144	0.452302	9.97346	3.00232	0.00989336	0.243372	-2.82996	ILMN_2298511	BOLA2	stable	552900
1145	-0.15047	7.53614	-2.99992	0.00993966	0.243878	-2.83438	ILMN_1690420	GFI1	stable	2672
1146	0.269073	13.9708	2.99911	0.00995548	0.243888	-2.83588	ILMN_1772359	LAPTM5	stable	7805
1147	-0.19441	7.18509	-2.99866	0.00996419	0.24397	-2.83671	ILMN_1740502	CLEC4GP1	stable	440508
1148	0.298499	7.95757	2.99772	0.00998245	0.24426	-2.83845	ILMN_1725346	SNAPC1	stable	6617
1149	-0.340786	9.19529	-2.99687	0.00999886	0.24426	-2.84	ILMN_1686906	TP53INP2	stable	58476
1150	-0.248423	7.75202	-2.99681	0.0100002	0.24426	-2.84012	ILMN_1683494	TMEM154	stable	201799
1151	0.291139	7.9244	2.99666	0.0100031	0.24426	-2.8404	ILMN_1771664	CLEC4E	stable	26253
1152	-0.141965	7.18874	-2.99645	0.0100071	0.24426	-2.84078	ILMN_1687708	LOC646471	stable	646471
1153	0.257543	9.66034	2.99551	0.0100255	0.244288	-2.84252	ILMN_1742611	C1orf52	stable	148423
1154	0.240797	10.446	2.99534	0.0100289	0.244288	-2.84284	ILMN_1764177	JARID2	stable	3720
1155	-0.653537	8.71646	-2.9948	0.0100393	0.244353	-2.84382	ILMN_1682799	STAMBPL1	stable	57559
1156	0.245268	8.97905	2.9943	0.0100492	0.244405	-2.84475	ILMN_1713301	DGCR2	stable	9993
1157	0.345846	10.1565	2.99325	0.0100698	0.244527	-2.84669	ILMN_1703617	AHSA1	stable	10598
1158	0.308218	11.1932	2.99221	0.0100901	0.244895	-2.8486	ILMN_1757287	MAPK6	stable	5597
1159	-0.44992	9.08328	-2.9903	0.0101276	0.245391	-2.85211	ILMN_1674983	LINC00857	stable	439990
1160	0.235013	7.2355	2.98953	0.0101429	0.245442	-2.85354	ILMN_1808241	PNPLA1	stable	285848
1161	0.201943	7.50288	2.98881	0.0101572	0.245481	-2.85487	ILMN_1711699	HIP1R	stable	9026
1162	-0.349088	10.7378	-2.9863	0.010207	0.246401	-2.8595	ILMN_1710906	RNF145	stable	153830
1163	0.176293	7.793	2.98617	0.0102095	0.246401	-2.85974	ILMN_1800838	SPATA12	stable	353324
1164	-0.243628	10.0719	-2.98199	0.0102931	0.24808	-2.86745	ILMN_1682930	SIPA1	stable	6494
1165	0.242431	8.24783	2.98189	0.0102949	0.24808	-2.86762	ILMN_1793033	RBM28	stable	55131
1166	-0.166558	7.40917	-2.98118	0.0103093	0.2483	-2.86894	ILMN_3199489	PDCD4-AS1	stable	282997
1167	0.257051	8.03683	2.97944	0.0103441	0.248759	-2.87213	ILMN_1812503	PHKA1	stable	5255
1168	-0.513736	9.24293	-2.97846	0.0103639	0.248981	-2.87394	ILMN_1689371	GIMAP2	stable	26157
1169	0.333399	9.79234	2.97688	0.010396	0.249447	-2.87686	ILMN_1742089	NLN	stable	57486
1170	0.145237	13.6713	2.97645	0.0104045	0.249447	-2.87764	ILMN_1751956	MGST3	stable	4259
1171	0.322666	10.1224	2.9763	0.0104077	0.249447	-2.87793	ILMN_1668012	SLC25A13	stable	10165
1172	0.120753	7.0859	2.9761	0.0104118	0.249447	-2.8783	ILMN_1774207	ANGPT2	stable	285
1173	-0.32639	10.6128	-2.97499	0.0104343	0.249783	-2.88034	ILMN_1713668	TSNAX	stable	7257
1174	-0.411081	8.98712	-2.97383	0.0104578	0.250091	-2.88247	ILMN_1729161	NOTCH1	stable	4851
1175	-0.257786	8.84385	-2.97304	0.0104738	0.250349	-2.88392	ILMN_2124386	RGL2	stable	5863
1176	-0.272621	8.07352	-2.97215	0.0104922	0.250435	-2.88557	ILMN_3246209	SCARNA10	stable	692148
1177	-0.166278	13.4762	-2.97115	0.0105126	0.250528	-2.88741	ILMN_1707810	RPS5	stable	6193
1178	-0.199471	7.37656	-2.9711	0.0105136	0.250528	-2.88751	ILMN_1714891	OR2A14	stable	135941
1179	0.28611	9.8411	2.96972	0.0105419	0.25096	-2.89005	ILMN_1701058	TATDN1	stable	83940
1180	0.222916	8.07374	2.96715	0.0105948	0.251966	-2.89478	ILMN_1688639	FBXL2	stable	25827
1181	0.160006	7.58935	2.96679	0.0106022	0.251974	-2.89544	ILMN_1706722	CD200	stable	4345
1182	-0.123972	7.45755	-2.96654	0.0106073	0.251974	-2.89589	ILMN_1750880	AMN1	stable	196394
1183	0.12627	7.28326	2.96635	0.0106112	0.251974	-2.89624	ILMN_1805823	BANF2	stable	140836
1184	-0.408107	8.28494	-2.96524	0.0106343	0.252269	-2.8983	ILMN_1803779	AP2A2	stable	161
1185	0.440659	9.94743	2.95661	0.0108143	0.254827	-2.91418	ILMN_1700733	FAM214A	stable	56204
1186	0.354085	12.0493	2.95618	0.0108234	0.254827	-2.91496	ILMN_1674034	MACROH2A1	stable	9555
1187	-0.241748	7.55194	-2.95584	0.0108307	0.254827	-2.9156	ILMN_1699139	CYP19A1	stable	1588
1188	0.614478	9.50305	2.95555	0.0108368	0.254827	-2.91613	ILMN_1729691	SLC16A6	stable	9120
1189	-0.464442	9.50589	-2.95531	0.0108418	0.254827	-2.91657	ILMN_1669523	FOS	stable	2353
1190	-0.478058	8.20456	-2.95519	0.0108443	0.254827	-2.91679	ILMN_1782403	PRR11	stable	55771
1191	-0.228278	8.18046	-2.95248	0.0109016	0.255784	-2.92177	ILMN_1654457	TXN2	stable	25828
1192	0.172976	7.52248	2.95214	0.0109089	0.255829	-2.92241	ILMN_1753523	SDC3	stable	9672
1193	0.721927	9.26099	2.95182	0.0109156	0.255859	-2.92299	ILMN_1772224	KCNJ5	stable	3762
1194	0.339355	8.66901	2.9513	0.0109268	0.255994	-2.92395	ILMN_1687442	TNIK	stable	23043
1195	-0.140217	7.34961	-2.95085	0.0109364	0.256091	-2.92478	ILMN_1664773	C11orf49	stable	79096
1196	-0.217618	10.2187	-2.94985	0.0109575	0.256273	-2.92661	ILMN_1764230	GNPTG	stable	84572
1197	-0.25267	9.49534	-2.94972	0.0109604	0.256273	-2.92686	ILMN_2078697	ALPK1	stable	80216
1198	0.20646	9.29305	2.94859	0.0109845	0.256582	-2.92893	ILMN_1696702	NEO1	stable	4756
1199	0.23018	8.2669	2.94741	0.0110099	0.256851	-2.93111	ILMN_1682368	LRWD1	stable	222229
1200	-0.499161	8.77384	-2.94714	0.0110156	0.256851	-2.93161	ILMN_1740505	SGMS1	stable	259230
1201	0.337072	8.43667	2.94704	0.0110178	0.256851	-2.93179	ILMN_1705953	LONRF1	stable	91694
1202	0.275758	10.7847	2.94521	0.011057	0.257247	-2.93515	ILMN_1807596	UBAP1	stable	51271
1203	0.323257	10.8564	2.94519	0.0110574	0.257247	-2.93518	ILMN_1665831	CLPTM1	stable	1209
1204	-0.224816	9.9107	-2.94361	0.0110916	0.257555	-2.9381	ILMN_1723414	HACL1	stable	26061
1205	0.177051	7.2047	2.94161	0.0111347	0.258068	-2.94176	ILMN_1800317	WNT5A	stable	7474
1206	-0.140598	7.1322	-2.94157	0.0111355	0.258068	-2.94184	ILMN_1779742	GABRD	stable	2563
1207	0.146461	7.51868	2.94086	0.0111511	0.258209	-2.94316	ILMN_1790781	DHRS13	stable	147015
1208	-0.426525	10.972	-2.94032	0.0111627	0.258209	-2.94414	ILMN_2216582	LYL1	stable	4066
1209	0.22195	7.48352	2.93996	0.0111705	0.258209	-2.94479	ILMN_1691507	CXCR2P1	stable	3580
1210	-0.258022	8.27822	-2.93995	0.0111708	0.258209	-2.94483	ILMN_1803561	PLA2G4A	stable	5321
1211	-0.459193	8.23935	-2.93992	0.0111715	0.258209	-2.94488	ILMN_1814333	SERPINI1	stable	5274
1212	-0.273077	13.1823	-2.93927	0.0111856	0.258341	-2.94608	ILMN_1695311	HLA-DMA	stable	3108
1213	0.346	10.5714	2.93813	0.0112103	0.258629	-2.94816	ILMN_1659189	CARD19	stable	84270
1214	-0.260526	8.67285	-2.93801	0.0112129	0.258629	-2.94838	ILMN_1805990	BAK1	stable	578
1215	0.231969	9.92669	2.93769	0.01122	0.258629	-2.94897	ILMN_1679358	ZDHHC5	stable	25921
1216	0.140078	7.25374	2.93714	0.011232	0.25878	-2.94999	ILMN_1787360	GUCA1C	stable	9626
1217	-0.19004	7.2891	-2.93608	0.0112551	0.259088	-2.95192	ILMN_1718046	ARNT2	stable	9915
1218	0.150629	7.34445	2.93269	0.0113298	0.260189	-2.95817	ILMN_1651430	CTRB2	stable	440387
1219	-0.158887	7.8734	-2.93235	0.0113372	0.260189	-2.95879	ILMN_3238797	FAM72A	stable	729533
1220	-0.240464	7.90599	-2.92982	0.011393	0.260957	-2.96343	ILMN_1699521	LOC100506123	stable	100506123
1221	0.170685	13.9652	2.92753	0.0114439	0.261747	-2.96764	ILMN_1806692	HEXB	stable	3074
1222	0.274169	9.45873	2.92724	0.0114505	0.26177	-2.96818	ILMN_1756162	EXOSC8	stable	11340
1223	0.454296	9.66798	2.92695	0.0114569	0.261791	-2.96871	ILMN_1666665	COL23A1	stable	91522
1224	-0.446769	8.36104	-2.92531	0.0114935	0.26225	-2.97172	ILMN_1718982	BEST1	stable	7439
1225	0.359334	7.91052	2.92429	0.0115162	0.262479	-2.97359	ILMN_3241378	PPIEL	stable	728448
1226	0.25114	8.82493	2.92325	0.0115395	0.262662	-2.97549	ILMN_1775761	TSR1	stable	55720
1227	-0.659158	9.46225	-2.92217	0.0115639	0.262662	-2.97749	ILMN_1707051	NFATC1	stable	4772
1228	-0.362627	12.3314	-2.92202	0.0115673	0.262662	-2.97777	ILMN_1685009	ITGAM	stable	3684
1229	-0.219497	7.43579	-2.92151	0.0115788	0.262796	-2.97871	ILMN_1767665	GPX8	stable	493869
1230	-0.251308	7.79474	-2.9202	0.0116082	0.263085	-2.9811	ILMN_1758529	P2RX1	stable	5023
1231	0.215332	12.756	2.91815	0.0116545	0.263829	-2.98486	ILMN_1693490	SEC11A	stable	23478
1232	-0.142238	7.23393	-2.91754	0.0116684	0.263829	-2.98598	ILMN_1697729	MAP2K6	stable	5608
1233	0.201782	12.4332	2.91752	0.011669	0.263829	-2.98603	ILMN_1793829	TMCO1	stable	54499
1234	-0.190854	10.6185	-2.91699	0.011681	0.263974	-2.987	ILMN_1692199	RNF103	stable	7844
1235	-0.280161	10.2244	-2.91628	0.0116972	0.263994	-2.98831	ILMN_1706434	YBX3P1	stable	440359
1236	0.256186	10.6153	2.91621	0.0116987	0.263994	-2.98843	ILMN_2228873	STARD3NL	stable	83930
1237	0.347907	11.1392	2.91372	0.0117555	0.264634	-2.993	ILMN_1804863	FKBP15	stable	23307
1238	0.446933	9.52565	2.91363	0.0117574	0.264634	-2.99316	ILMN_1742187	MAN1A1	stable	4121
1239	0.369478	9.66962	2.913	0.0117718	0.264634	-2.99431	ILMN_1789001	SLC35B2	stable	347734
1240	-0.199352	7.326	-2.913	0.0117718	0.264634	-2.99431	ILMN_1806533	PDE7B	stable	27115
1241	-0.259413	10.7534	-2.91232	0.0117875	0.264861	-2.99557	ILMN_1791576	CHSY1	stable	22856
1242	-0.405171	8.61692	-2.90824	0.0118815	0.266338	-3.00306	ILMN_1713867	PMFBP1	stable	83449
1243	-0.167707	11.3664	-2.90718	0.0119059	0.266631	-3.005	ILMN_1725312	RASA1	stable	5921
1244	-0.195272	7.47363	-2.90658	0.0119198	0.266816	-3.0061	ILMN_1695744	LILRB2	stable	10288
1245	-0.341582	9.47759	-2.9031	0.0120007	0.268153	-3.01248	ILMN_1789616	NUP42	stable	11097
1246	0.206779	7.54228	2.90303	0.0120022	0.268153	-3.0126	ILMN_1740052	SPEG	stable	10290
1247	-0.278971	8.34838	-2.90188	0.0120292	0.268501	-3.01472	ILMN_2148679	TMCC1-DT	stable	100507032
1248	-0.287306	8.99909	-2.90143	0.0120398	0.268612	-3.01555	ILMN_1797974	AIG1	stable	51390
1249	0.393283	10.4211	2.9011	0.0120474	0.268655	-3.01615	ILMN_1789361	PKD2L1	stable	9033
1250	0.322127	11.5624	2.90053	0.0120609	0.268828	-3.0172	ILMN_1743032	CTSS	stable	1520
1251	-0.252216	8.34134	-2.89897	0.0120975	0.269509	-3.02006	ILMN_1668822	BATF	stable	10538
1252	-0.189448	8.21338	-2.89717	0.0121399	0.270049	-3.02336	ILMN_1748109	PEX1	stable	5189
1253	0.172729	7.46444	2.89698	0.0121442	0.270049	-3.02369	ILMN_1775634	AGTR2	stable	186
1254	0.32154	9.72567	2.89528	0.0121844	0.270307	-3.02681	ILMN_1700681	CD99L2	stable	83692
1255	-0.277102	7.55416	-2.89395	0.0122159	0.270791	-3.02925	ILMN_1792726	TDRKH	stable	11022
1256	-0.373142	9.46849	-2.89388	0.0122177	0.270791	-3.02939	ILMN_1743933	TSHZ3	stable	57616
1257	-0.26753	9.39802	-2.89216	0.0122586	0.271514	-3.03254	ILMN_1667239	INPP1	stable	3628
1258	0.209955	7.63687	2.89178	0.0122676	0.271514	-3.03323	ILMN_1711611	CR1	stable	1378
1259	0.261834	7.43495	2.89151	0.0122742	0.271532	-3.03374	ILMN_1672148	AKR1B10	stable	57016
1260	-0.167233	12.5384	-2.89117	0.0122822	0.271583	-3.03435	ILMN_1802027	MGST2	stable	4258
1261	0.380186	10.2298	2.89005	0.0123089	0.27179	-3.0364	ILMN_1758034	ETFDH	stable	2110
1262	0.228206	9.19201	2.8888	0.0123388	0.271821	-3.03869	ILMN_1728224	OGFR	stable	11054
1263	-0.275823	11.9507	-2.88825	0.0123521	0.271827	-3.0397	ILMN_1671482	GALM	stable	130589
1264	0.243687	8.83118	2.88806	0.0123565	0.271827	-3.04004	ILMN_1689817	LCOR	stable	84458
1265	0.195414	7.5576	2.88753	0.0123694	0.271983	-3.04102	ILMN_1806293	LIN7A	stable	8825
1266	-0.596736	10.472	-2.88645	0.0123953	0.272066	-3.043	ILMN_1747347	MILR1	stable	284021
1267	-0.134037	10.6775	-2.88642	0.0123961	0.272066	-3.04305	ILMN_1815051	API5	stable	8539
1268	-0.29594	8.56078	-2.88513	0.0124273	0.272621	-3.04542	ILMN_1741594	CLCN6	stable	1185
1269	0.153455	7.21172	2.8821	0.0125006	0.273848	-3.05097	ILMN_1766377	PCDHB6	stable	56130
1270	-0.199572	9.73867	-2.88107	0.0125255	0.274138	-3.05284	ILMN_1738750	TFCP2	stable	7024
1271	-0.144957	7.19406	-2.88003	0.0125509	0.274568	-3.05476	ILMN_1688537	OR10J3	stable	441911
1272	-0.299124	10.5921	-2.87923	0.0125705	0.274742	-3.05622	ILMN_1724493	LYSMD2	stable	256586
1273	0.130717	7.09786	2.87814	0.012597	0.274964	-3.05821	ILMN_1810093	TSPAN2	stable	10100
1274	0.211824	8.38857	2.87587	0.0126527	0.275772	-3.06237	ILMN_2059211	TMEM94	stable	9772
1275	-0.301749	7.21174	-2.87529	0.0126669	0.275955	-3.06343	ILMN_1704376	GLDN	stable	342035
1276	0.347479	9.83508	2.87452	0.0126859	0.276017	-3.06484	ILMN_2180606	NAA50	stable	80218
1277	-0.536057	8.49268	-2.87448	0.0126868	0.276017	-3.06491	ILMN_1746819	C5	stable	727
1278	0.121985	7.15956	2.87446	0.0126875	0.276017	-3.06495	ILMN_1708982	OR10K2	stable	391107
1279	-0.398603	10.1945	-2.87422	0.0126934	0.276017	-3.06539	ILMN_1695962	SLC12A9	stable	56996
1280	0.239233	8.16262	2.87389	0.0127015	0.276017	-3.066	ILMN_1661428	ATP11C	stable	286410
1281	0.241331	8.04503	2.87353	0.0127105	0.276017	-3.06666	ILMN_1694269	CCDC93	stable	54520
1282	-0.303755	7.53855	-2.87352	0.0127106	0.276017	-3.06667	ILMN_3237617	RNU5A-1	stable	26831
1283	-0.641574	10.302	-2.87164	0.0127572	0.276647	-3.07012	ILMN_1796409	C1QB	stable	713
1284	0.579155	9.52611	2.86934	0.0128142	0.277628	-3.07432	ILMN_1655702	ABHD5	stable	51099
1285	0.119749	7.16214	2.8682	0.0128427	0.277999	-3.07641	ILMN_1691375	CSPG4P1Y	stable	114758
1286	-0.165216	7.33966	-2.86726	0.0128662	0.278213	-3.07814	ILMN_1720004	LRRC8C-DT	stable	400761
1287	-0.314995	9.65699	-2.86708	0.0128707	0.278213	-3.07846	ILMN_1737025	PLCL2	stable	23228
1288	-0.323837	7.41478	-2.86679	0.0128779	0.278242	-3.079	ILMN_1654540	SEMA6D	stable	80031
1289	0.298869	8.70895	2.86519	0.012918	0.27894	-3.08192	ILMN_1781360	MPHOSPH6	stable	10200
1290	-0.470746	10.0268	-2.8643	0.0129402	0.279078	-3.08354	ILMN_1784661	CEMIP2	stable	23670
1291	0.174039	8.32175	2.86164	0.0130072	0.280122	-3.08841	ILMN_1719972	PLXNA3	stable	55558
1292	0.121333	7.37128	2.86138	0.0130137	0.280122	-3.08888	ILMN_1707368	OPRD1	stable	4985
1293	-0.40687	8.2434	-2.86013	0.0130455	0.280197	-3.09117	ILMN_1743219	CA11	stable	770
1294	0.145213	7.59012	2.85968	0.0130569	0.280313	-3.09199	ILMN_1693245	ZCCHC4	stable	29063
1295	0.22622	8.42567	2.85859	0.0130844	0.280401	-3.09398	ILMN_1727642	MOGS	stable	7841
[truncated: 19,622 more rows]
