# Supplementary material for: Identification and validation of hub genes involved in foam cell formation and atherosclerosis development via bioinformatics
Source: PeerJ. 2023 Oct 3;11:e16122. doi: 10.7717/peerj.16122 (PMC10557941; doi:10.7717/peerj.16122)
Supplement: Supplemental Information 2 [file peerj-11-16122-s002.xlsx]

## Sheet: Sheet1
ONTOLOGY	ID	Description	GeneRatio	BgRatio	pvalue	p.adjust	qvalue	geneID	Count
CC	GO:0005635	nuclear envelope	14/211	464/19717	0.000497445	0.0469315	0.0424854	DHCR7/GCHFR/NPC1/PAK1/TM7SF2/EBP/RAB40B/RNF13/LPIN1/TMEM97/FAM156A/OTULINL/TMEM38B/C9orf72	14
CC	GO:0045121	membrane raft	11/211	315/19717	0.00060958	0.0469315	0.0424854	ABCA1/CTSD/DAG1/INPP5D/NPC1/OLR1/TFPI/TGFBR2/LAT2/ITLN1/SPRED1	11
CC	GO:0071437	invadopodium	3/211	16/19717	0.000610463	0.0469315	0.0424854	PAK1/PLAUR/FSCN1	3
CC	GO:0098857	membrane microdomain	11/211	316/19717	0.000625753	0.0469315	0.0424854	ABCA1/CTSD/DAG1/INPP5D/NPC1/OLR1/TFPI/TGFBR2/LAT2/ITLN1/SPRED1	11
CC	GO:0098589	membrane region	11/211	328/19717	0.000849421	0.0509652	0.0461369	ABCA1/CTSD/DAG1/INPP5D/NPC1/OLR1/TFPI/TGFBR2/LAT2/ITLN1/SPRED1	11
CC	GO:0009897	external side of plasma membrane	12/211	393/19717	0.0011254	0.0562702	0.0509393	ABCA1/CD33/DAG1/GSR/IL1R1/LDLR/TGFBR2/TNFRSF11A/CD209/ANTXR1/CD200R1/CD163L1	12
CC	GO:0005791	rough endoplasmic reticulum	5/211	85/19717	0.00219461	0.0940545	0.0851441	KCNJ2/LRPAP1/SLC7A11/TMEM97/NCF1	5
