# Supplementary material for: Identification and validation of hub genes involved in foam cell formation and atherosclerosis development via bioinformatics
Source: PeerJ. 2023 Oct 3;11:e16122. doi: 10.7717/peerj.16122 (PMC10557941; doi:10.7717/peerj.16122)
Supplement: Supplemental Information 4 [file peerj-11-16122-s004.xlsx]

## Sheet: WB strip grayscale values
WB strip grayscale values
		Test1	Test2	Test3
CSG1R
	Control	27648.8	26947.6	18590.3
	Ox-LDL(25 μg/ml)	38304.9	32969.6	17639
	Ox-LDL(50 μg/ml)	47947	41474.5	25259.2
GAPDH-CSFPR	Control	56415.8	50157.7	32690
	Ox-LDL(25 μg/ml)	44026.7	52844.3	26560.8
	Ox-LDL(50 μg/ml)	44616	57956.2	24126.7
PLAUR	Control	22116.6	9432.32	16778
	Ox-LDL(25 μg/ml)	33309.7	23677.9	21755.2
	Ox-LDL(50 μg/ml)	55874.2	39693.1	26671.2
GAPDH-PLAUR	Control	54758.9	42308.1	32690
	Ox-LDL(25 μg/ml)	49597.9	29599	26560.8
	Ox-LDL(50 μg/ml)	53104.2	35742.5	24126.7
